# Supplementary material for: Association of Cutibacterium acnes with human thyroid cancer
Source: PubMed Central journal article supplement (PMC10668118; doi:10.3389/fendo.2023.1152514), 2023-11-10
Supplement: DataSheet_1.pdf [file DataSheet_1.pdf]

## **Association of *Cutibacterium acne* with human thyroid cancer**

Vaishakhi Trivedi<sup>1,2</sup>, Vanita Noronha<sup>1,2</sup>, Peddagangannagari Sreekanthreddy<sup>3</sup>, Sanket Desai<sup>2,4</sup>, Disha Poojary<sup>1</sup>, Linu Varughese<sup>3</sup>, Pooja Gowda<sup>3</sup>, Ashwin Butle<sup>4</sup>, Rohit Mishra<sup>4</sup>, Munita Bal<sup>5</sup>, Neha Mittal<sup>5</sup>, Swapnil Rane<sup>5</sup>, Shubhada Kane<sup>6</sup>, Sandip Basu<sup>7</sup>, Vijay Patil<sup>1</sup>, Nandini Menon<sup>1</sup>, Ajay Kumar Singh<sup>1</sup>, Pankaj Chaturvedi<sup>2,8</sup>, Pratik Chandrani<sup>2,9,10</sup>, Anuradha Choughule<sup>1,2</sup>, Vidya Veldore<sup>3</sup>, Kumar Prabhash<sup>1,2#</sup>, Amit Dutt<sup>2,4\*</sup>

1. Department of medical oncology, Tata Memorial Hospital, Ernest Borges Marg, Parel, Mumbai 400012, Maharashtra, India.
2. Homi Bhabha National Institute, Training School Complex, Anushakti Nagar, Mumbai 400094, Maharashtra, India
3. 4baseCare Oncosolutions Pvt Ltd, Institute of Bioinformatics and Applied Biotechnology, Biotech Park Electronic City Phase I, Bengaluru 560100, Karnataka, India
4. Integrated Cancer Genomics Laboratory, Advanced Centre for Treatment, Research, and Education in Cancer, Kharghar, Navi Mumbai 410210, Maharashtra, India
5. Department of Pathology, Tata Memorial Hospital, Ernest Borges Marg, Parel, Mumbai 400012, Maharashtra, India.
6. Consultant onco-pathologist, Jaslok Hospital, Pedder Rd, IT Colony, Tardeo, Mumbai 400026, Maharashtra, India.
7. Radiation Medicine Centre, Bhabha Atomic Research Centre, Tata Memorial Hospital Ernest Borges Marg, Parel, Mumbai 400012, Maharashtra, India.
8. Department of Head and Neck Oncology, Tata Memorial Centre, Ernest Borges Marg, Parel, Mumbai 400012, Maharashtra, India
9. Medical oncology molecular laboratory, Tata Memorial Hospital, Ernest Borges Marg, Parel, Mumbai 400012, Maharashtra, India
10. Centre for computational biology, bioinformatics and crosstalk lab, Advanced Centre for Treatment, Research, and Education in Cancer, Kharghar, Navi Mumbai 410210, Maharashtra, India

# Corresponding author: Dr. Kumar Prabhash

Email address: kprabhash1@gmail.com

Correspondence address: Department of medical oncology, Tata Memorial Hospital, Ernest Borges Marg, Parel, Mumbai 400012, Maharashtra, India

\* Co-Corresponding author: Dr. Amit Dutt

Email address: adutt@actrec.gov.in

Correspondence address: ACTREC-Tata Memorial Centre, Sector-22, Kharghar, Navi Mumbai 410210, Maharashtra, India

### Supplementary Figure S1

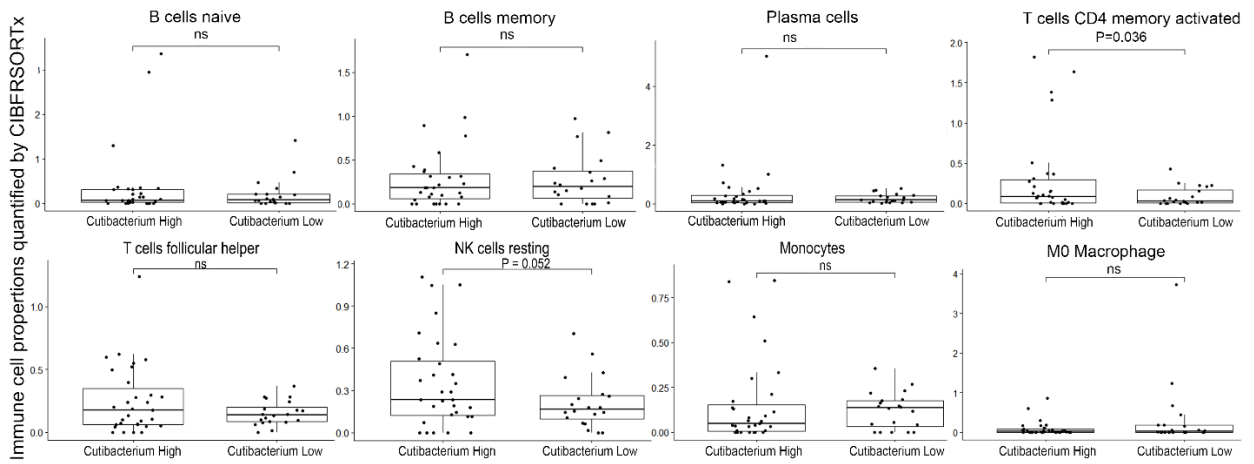

### Supplementary Figure S2

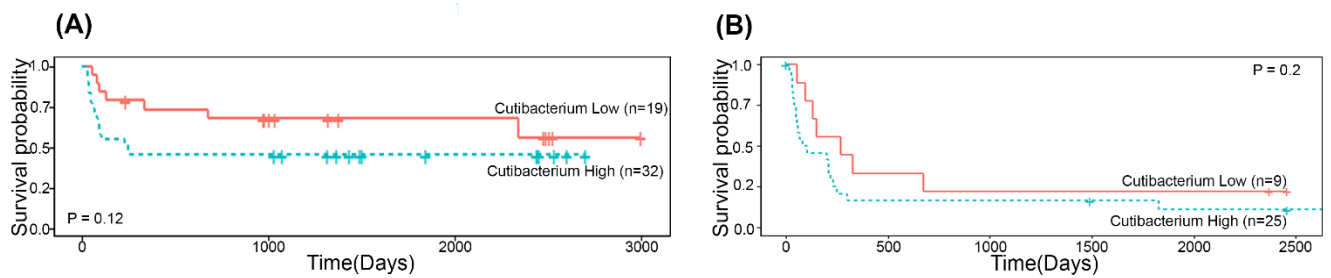

### Supplementary Figure S3

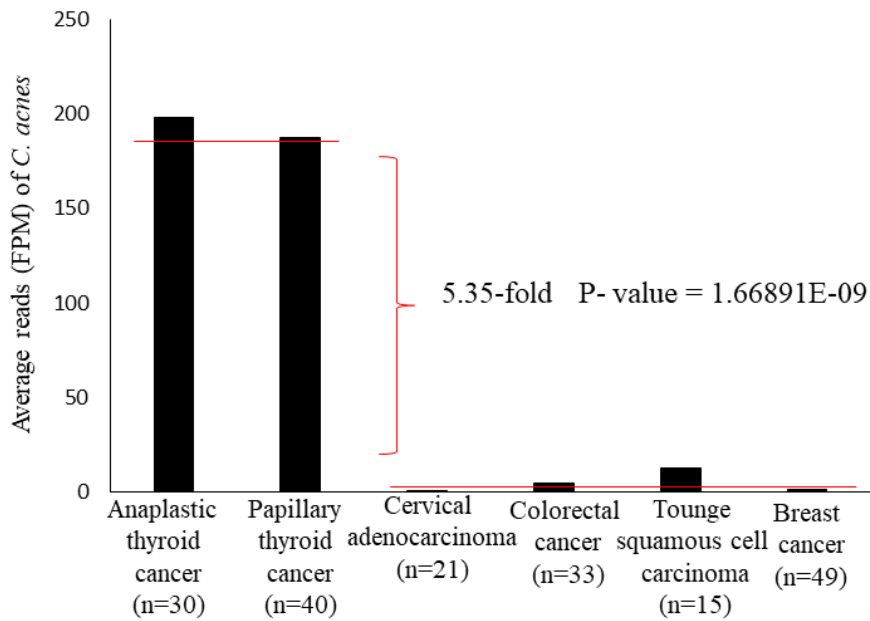

## Supplementary Figure S4

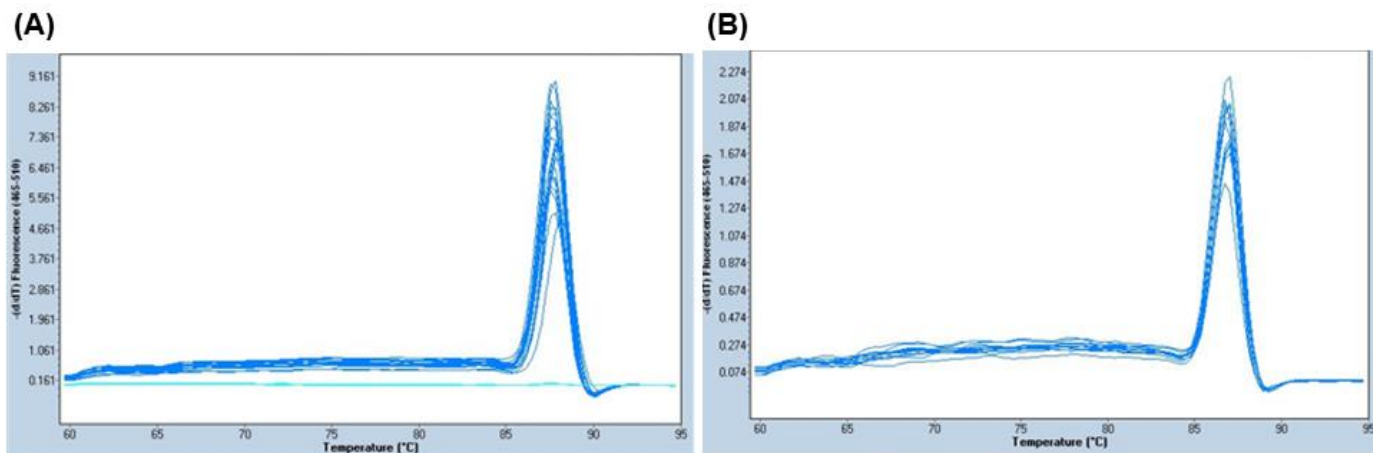

**Supplementary Table S1:** In-house whole transcriptome samples analysed using IPD.

| Sr. No. | Tumor type                | Data type     | ADLABID | Tumor_Normal | Public ID    |
|---------|---------------------------|---------------|---------|--------------|--------------|
| 1       | Anaplastic thyroid cancer | Transcriptome | AD3387  | Tumor        | E-MTAB-12479 |
| 2       | Anaplastic thyroid cancer | Transcriptome | AD3388  | Tumor        | E-MTAB-12479 |
| 3       | Anaplastic thyroid cancer | Transcriptome | AD3389  | Tumor        | E-MTAB-12479 |
| 4       | Anaplastic thyroid cancer | Transcriptome | AD3390  | Tumor        | E-MTAB-12479 |
| 5       | Anaplastic thyroid cancer | Transcriptome | AD3391  | Tumor        | E-MTAB-12479 |
| 6       | Anaplastic thyroid cancer | Transcriptome | AD3392  | Tumor        | E-MTAB-12479 |
| 7       | Anaplastic thyroid cancer | Transcriptome | AD3393  | Tumor        | E-MTAB-12479 |
| 8       | Anaplastic thyroid cancer | Transcriptome | AD3394  | Tumor        | E-MTAB-12479 |
| 9       | Anaplastic thyroid cancer | Transcriptome | AD3397  | Tumor        | E-MTAB-12479 |
| 10      | Anaplastic thyroid cancer | Transcriptome | AD3399  | Tumor        | E-MTAB-12479 |
| 11      | Anaplastic thyroid cancer | Transcriptome | AD3400  | Tumor        | E-MTAB-12479 |
| 12      | Anaplastic thyroid cancer | Transcriptome | AD3403  | Tumor        | E-MTAB-12479 |
| 13      | Anaplastic thyroid cancer | Transcriptome | AD3405  | Tumor        | E-MTAB-12479 |
| 14      | Anaplastic thyroid cancer | Transcriptome | AD3406  | Tumor        | E-MTAB-12479 |
| 15      | Anaplastic thyroid cancer | Transcriptome | AD3407  | Tumor        | E-MTAB-12479 |
| 16      | Anaplastic thyroid cancer | Transcriptome | AD3408  | Tumor        | E-MTAB-12479 |
| 17      | Anaplastic thyroid cancer | Transcriptome | AD3409  | Tumor        | E-MTAB-12479 |
| 18      | Anaplastic thyroid cancer | Transcriptome | AD3410  | Tumor        | E-MTAB-12479 |
| 19      | Anaplastic thyroid cancer | Transcriptome | AD3411  | Tumor        | E-MTAB-12479 |
| 20      | Anaplastic thyroid cancer | Transcriptome | AD3412  | Tumor        | E-MTAB-12479 |
| 21      | Anaplastic thyroid cancer | Transcriptome | AD3413  | Tumor        | E-MTAB-12479 |
| 22      | Anaplastic thyroid cancer | Transcriptome | AD3414  | Tumor        | E-MTAB-12479 |
| 23      | Anaplastic thyroid cancer | Transcriptome | AD3415  | Tumor        | E-MTAB-12479 |
| 24      | Anaplastic thyroid cancer | Transcriptome | AD3416  | Tumor        | E-MTAB-12479 |
| 25      | Anaplastic thyroid cancer | Transcriptome | AD3417  | Tumor        | E-MTAB-12479 |
| 26      | Anaplastic thyroid cancer | Transcriptome | AD3418  | Tumor        | E-MTAB-12479 |
| 27      | Anaplastic thyroid cancer | Transcriptome | AD3420  | Tumor        | E-MTAB-12479 |

|    |                           |               |        |       |              |
|----|---------------------------|---------------|--------|-------|--------------|
| 28 | Anaplastic thyroid cancer | Transcriptome | AD3421 | Tumor | E-MTAB-12479 |
| 29 | Anaplastic thyroid cancer | Transcriptome | AD3422 | Tumor | E-MTAB-12479 |
| 30 | Anaplastic thyroid cancer | Transcriptome | AD3424 | Tumor | E-MTAB-12479 |
| 31 | Papillary thyroid cancer  | Transcriptome | AD3347 | Tumor | E-MTAB-12476 |
| 32 | Papillary thyroid cancer  | Transcriptome | AD3348 | Tumor | E-MTAB-12476 |
| 33 | Papillary thyroid cancer  | Transcriptome | AD3376 | Tumor | E-MTAB-12476 |
| 34 | Papillary thyroid cancer  | Transcriptome | AD3349 | Tumor | E-MTAB-12476 |
| 35 | Papillary thyroid cancer  | Transcriptome | AD3350 | Tumor | E-MTAB-12476 |
| 36 | Papillary thyroid cancer  | Transcriptome | AD3377 | Tumor | E-MTAB-12476 |
| 37 | Papillary thyroid cancer  | Transcriptome | AD3351 | Tumor | E-MTAB-12476 |
| 38 | Papillary thyroid cancer  | Transcriptome | AD3352 | Tumor | E-MTAB-12476 |
| 39 | Papillary thyroid cancer  | Transcriptome | AD3378 | Tumor | E-MTAB-12476 |
| 40 | Papillary thyroid cancer  | Transcriptome | AD3353 | Tumor | E-MTAB-12476 |
| 41 | Papillary thyroid cancer  | Transcriptome | AD3354 | Tumor | E-MTAB-12476 |
| 42 | Papillary thyroid cancer  | Transcriptome | AD3355 | Tumor | E-MTAB-12476 |
| 43 | Papillary thyroid cancer  | Transcriptome | AD3379 | Tumor | E-MTAB-12476 |
| 44 | Papillary thyroid cancer  | Transcriptome | AD3380 | Tumor | E-MTAB-12476 |
| 45 | Papillary thyroid cancer  | Transcriptome | AD3381 | Tumor | E-MTAB-12476 |
| 46 | Papillary thyroid cancer  | Transcriptome | AD3356 | Tumor | E-MTAB-12476 |
| 47 | Papillary thyroid cancer  | Transcriptome | AD3357 | Tumor | E-MTAB-12476 |
| 48 | Papillary thyroid cancer  | Transcriptome | AD3358 | Tumor | E-MTAB-12476 |
| 49 | Papillary thyroid cancer  | Transcriptome | AD3359 | Tumor | E-MTAB-12476 |
| 50 | Papillary thyroid cancer  | Transcriptome | AD3360 | Tumor | E-MTAB-12476 |
| 51 | Papillary thyroid cancer  | Transcriptome | AD3382 | Tumor | E-MTAB-12476 |
| 52 | Papillary thyroid cancer  | Transcriptome | AD3361 | Tumor | E-MTAB-12476 |
| 53 | Papillary thyroid cancer  | Transcriptome | AD3362 | Tumor | E-MTAB-12476 |
| 54 | Papillary thyroid cancer  | Transcriptome | AD3363 | Tumor | E-MTAB-12476 |
| 55 | Papillary thyroid cancer  | Transcriptome | AD3383 | Tumor | E-MTAB-12476 |
| 56 | Papillary thyroid cancer  | Transcriptome | AD3384 | Tumor | E-MTAB-12476 |
| 57 | Papillary thyroid cancer  | Transcriptome | AD3364 | Tumor | E-MTAB-12476 |
| 58 | Papillary thyroid cancer  | Transcriptome | AD3365 | Tumor | E-MTAB-12476 |
| 59 | Papillary thyroid cancer  | Transcriptome | AD3366 | Tumor | E-MTAB-12476 |
| 60 | Papillary thyroid cancer  | Transcriptome | AD3385 | Tumor | E-MTAB-12476 |
| 61 | Papillary thyroid cancer  | Transcriptome | AD3367 | Tumor | E-MTAB-12476 |
| 62 | Papillary thyroid cancer  | Transcriptome | AD3368 | Tumor | E-MTAB-12476 |
| 63 | Papillary thyroid cancer  | Transcriptome | AD3369 | Tumor | E-MTAB-12476 |
| 64 | Papillary thyroid cancer  | Transcriptome | AD3386 | Tumor | E-MTAB-12476 |
| 65 | Papillary thyroid cancer  | Transcriptome | AD3370 | Tumor | E-MTAB-12476 |
| 66 | Papillary thyroid cancer  | Transcriptome | AD3371 | Tumor | E-MTAB-12476 |
| 67 | Papillary thyroid cancer  | Transcriptome | AD3372 | Tumor | E-MTAB-12476 |
| 68 | Papillary thyroid cancer  | Transcriptome | AD3373 | Tumor | E-MTAB-12476 |
| 69 | Papillary thyroid cancer  | Transcriptome | AD3374 | Tumor | E-MTAB-12476 |
| 70 | Papillary thyroid cancer  | Transcriptome | AD3375 | Tumor | E-MTAB-12476 |

**Supplementary Table S2:** List of primers used for *Cutibacterium acne* validation by qPCR

| Name              | Primer  | Sequence             |
|-------------------|---------|----------------------|
| Cutibacterium_16s | Forward | AGATGGGTGTGCCTCTTTTG |
|                   | Reverse | AAGGGGCATGATGACTTGAC |
| Beta-actin        | Forward | CCATCTACGAGGGGTATGC  |
|                   | Reverse | TGGTGGTGAAGCTGTAGCC  |

**Supplementary Table S3:** Transcriptome sequencing data statistics of papillary thyroid cancer (n=40) and anaplastic thyroid cancer (n=30)

| LabID     | Total reads (Millions) | Total Mapped reads on human genome (hg19) (Million) | % alignment on human genome hg19 | Length (bp) | % GC |
|-----------|------------------------|-----------------------------------------------------|----------------------------------|-------------|------|
| AD3347_R1 | 12.1                   | 6.04                                                | 50.15%                           | 151 bp      | 51%  |
| AD3347_R2 | 12.1                   | 6.04                                                | 50.15%                           | 150 bp      | 51%  |
| AD3348_R1 | 1                      | 0.62                                                | 65.38%                           | 151 bp      | 36%  |
| AD3348_R2 | 1                      | 0.62                                                | 65.38%                           | 151 bp      | 37%  |
| AD3376_R1 | 15.6                   | 5.47                                                | 35.03%                           | 151 bp      | 37%  |
| AD3376_R2 | 15.6                   | 5.47                                                | 35.03%                           | 151 bp      | 36%  |
| AD3349_R1 | 34.3                   | 18.10                                               | 52.71%                           | 151 bp      | 45%  |
| AD3349_R2 | 34.3                   | 18.10                                               | 52.71%                           | 151 bp      | 45%  |
| AD3350_R1 | 9.7                    | 4.01                                                | 41.36%                           | 150 bp      | 45%  |
| AD3350_R2 | 9.7                    | 4.01                                                | 41.36%                           | 151 bp      | 45%  |
| AD3377_R1 | 14                     | 6.06                                                | 43.31%                           | 151 bp      | 42%  |
| AD3377_R2 | 14                     | 6.06                                                | 43.31%                           | 151 bp      | 42%  |
| AD3351_R1 | 3.8                    | 1.71                                                | 45.45%                           | 151 bp      | 50%  |
| AD3351_R2 | 3.8                    | 1.71                                                | 45.45%                           | 151 bp      | 48%  |
| AD3352_R1 | 1.6                    | 0.13                                                | 8.17%                            | 151 bp      | 12%  |
| AD3352_R2 | 1.6                    | 0.13                                                | 8.17%                            | 151 bp      | 13%  |
| AD3378_R1 | 17.7                   | 5.22                                                | 29.47%                           | 151 bp      | 35%  |
| AD3378_R2 | 17.7                   | 5.22                                                | 29.47%                           | 151 bp      | 35%  |
| AD3353_R1 | 78.9                   | 59.36                                               | 75.24%                           | 150 bp      | 49%  |
| AD3353_R2 | 78.9                   | 59.36                                               | 75.24%                           | 151 bp      | 49%  |
| AD3354_R1 | 41.3                   | 28.84                                               | 69.83%                           | 150 bp      | 49%  |
| AD3354_R2 | 41.3                   | 28.84                                               | 69.83%                           | 151 bp      | 50%  |
| AD3355_R1 | 42.3                   | 31.53                                               | 74.60%                           | 150 bp      | 48%  |
| AD3355_R2 | 42.3                   | 31.53                                               | 74.60%                           | 151 bp      | 48%  |
| AD3379_R1 | 40.3                   | 24.14                                               | 59.90%                           | 151 bp      | 46%  |
| AD3379_R2 | 40.3                   | 24.14                                               | 59.90%                           | 151 bp      | 46%  |
| AD3380_R1 | 11.6                   | 4.85                                                | 41.80%                           | 151 bp      | 43%  |
| AD3380_R2 | 11.6                   | 4.85                                                | 41.80%                           | 151 bp      | 42%  |
| AD3381_R1 | 8.3                    | 0.85                                                | 10.28%                           | 151 bp      | 16%  |
| AD3381_R2 | 8.3                    | 0.85                                                | 10.28%                           | 151 bp      | 16%  |
| AD3356_R1 | 1.6                    | 0.42                                                | 26.84%                           | 151 bp      | 20%  |
| AD3356_R2 | 1.6                    | 0.42                                                | 26.84%                           | 151 bp      | 21%  |

|           |      |       |        |        |     |
|-----------|------|-------|--------|--------|-----|
| AD3357_R1 | 35.7 | 22.34 | 62.62% | 150 bp | 48% |
| AD3357_R2 | 35.7 | 22.34 | 62.62% | 151 bp | 48% |
| AD3358_R1 | 30.7 | 14.15 | 46.09% | 151 bp | 43% |
| AD3358_R2 | 30.7 | 14.15 | 46.09% | 151 bp | 43% |
| AD3359_R1 | 45.3 | 27.24 | 60.17% | 150 bp | 50% |
| AD3359_R2 | 45.3 | 27.24 | 60.17% | 151 bp | 51% |
| AD3360_R1 | 39.1 | 26.90 | 68.84% | 151 bp | 47% |
| AD3360_R2 | 39.1 | 26.90 | 68.84% | 151 bp | 47% |
| AD3382_R1 | 40.8 | 25.11 | 61.57% | 151 bp | 46% |
| AD3382_R2 | 40.8 | 25.11 | 61.57% | 151 bp | 47% |
| AD3361_R1 | 1.9  | 0.07  | 3.33%  | 151 bp | 5%  |
| AD3361_R2 | 1.9  | 0.07  | 3.33%  | 151 bp | 5%  |
| AD3362_R1 | 29.1 | 16.33 | 56.17% | 150 bp | 48% |
| AD3362_R2 | 29.1 | 16.33 | 56.17% | 151 bp | 48% |
| AD3363_R1 | 2.3  | 0.72  | 30.91% | 151 bp | 41% |
| AD3363_R2 | 2.3  | 0.72  | 30.91% | 151 bp | 41% |
| AD3383_R1 | 44.4 | 26.53 | 59.70% | 150 bp | 45% |
| AD3383_R2 | 44.4 | 26.53 | 59.70% | 151 bp | 46% |
| AD3384_R1 | 1.2  | 0.38  | 30.27% | 151 bp | 24% |
| AD3384_R2 | 1.2  | 0.38  | 30.27% | 151 bp | 24% |
| AD3364_R1 | 1.5  | 0.28  | 18.17% | 151 bp | 22% |
| AD3364_R2 | 1.5  | 0.28  | 18.17% | 151 bp | 23% |
| AD3365_R1 | 44.8 | 24.96 | 55.66% | 150 bp | 45% |
| AD3365_R2 | 44.8 | 24.96 | 55.66% | 151 bp | 44% |
| AD3366_R1 | 7.9  | 3.17  | 39.87% | 151 bp | 47% |
| AD3366_R2 | 7.9  | 3.17  | 39.87% | 151 bp | 47% |
| AD3385_R1 | 37.8 | 25.45 | 67.29% | 151 bp | 44% |
| AD3385_R2 | 37.8 | 25.45 | 67.29% | 151 bp | 44% |
| AD3367_R1 | 9.1  | 0.33  | 3.69%  | 151 bp | 6%  |
| AD3367_R2 | 9.1  | 0.33  | 3.69%  | 151 bp | 6%  |
| AD3368_R1 | 1.8  | 0.07  | 3.70%  | 151 bp | 5%  |
| AD3368_R2 | 1.8  | 0.07  | 3.70%  | 151 bp | 5%  |
| AD3369_R1 | 5.4  | 0.15  | 2.73%  | 151 bp | 5%  |
| AD3369_R2 | 5.4  | 0.15  | 2.73%  | 151 bp | 5%  |
| AD3386_R1 | 10.9 | 1.17  | 10.71% | 151 bp | 13% |
| AD3386_R2 | 10.9 | 1.17  | 10.71% | 151 bp | 13% |
| AD3370_R1 | 45.6 | 31.32 | 68.62% | 150 bp | 50% |
| AD3370_R2 | 45.6 | 31.32 | 68.62% | 151 bp | 51% |
| AD3371_R1 | 46.4 | 24.24 | 52.26% | 150 bp | 50% |
| AD3371_R2 | 46.4 | 24.24 | 52.26% | 150 bp | 49% |
| AD3372_R1 | 9.6  | 5.65  | 58.65% | 151 bp | 47% |
| AD3372_R2 | 9.6  | 5.65  | 58.65% | 151 bp | 47% |
| AD3373_R1 | 37.7 | 27.44 | 72.83% | 150 bp | 49% |
| AD3373_R2 | 37.7 | 27.44 | 72.83% | 151 bp | 49% |

|           |      |       |        |        |     |
|-----------|------|-------|--------|--------|-----|
| AD3374_R1 | 1.6  | 0.06  | 3.95%  | 151 bp | 6%  |
| AD3374_R2 | 1.6  | 0.06  | 3.95%  | 151 bp | 6%  |
| AD3375_R1 | 42.9 | 24.24 | 56.49% | 150 bp | 49% |
| AD3375_R2 | 42.9 | 24.24 | 56.49% | 151 bp | 48% |
| AD3400_R1 | 10.8 | 1.37  | 95.84% | 151 bp | 56% |
| AD3400_R2 | 10.8 | 1.37  | 95.84% | 151 bp | 55% |
| AD3387_R1 | 0.6  | 0.33  | 83.87% | 101 bp | 39% |
| AD3387_R2 | 0.6  | 0.33  | 83.87% | 107 bp | 38% |
| AD3388_R1 | 1.7  | 1.12  | 91.35% | 101 bp | 46% |
| AD3388_R2 | 1.7  | 1.12  | 91.35% | 107 bp | 42% |
| AD3389_R1 | 0.2  | 0.07  | 56.37% | 142 bp | 30% |
| AD3389_R2 | 0.2  | 0.07  | 56.37% | 144 bp | 31% |
| AD3390_R1 | 10.1 | 7.36  | 93.45% | 103 bp | 48% |
| AD3390_R2 | 10.1 | 7.36  | 93.45% | 109 bp | 45% |
| AD3391_R1 | 1.4  | 0.60  | 53.65% | 140 bp | 13% |
| AD3391_R2 | 1.4  | 0.60  | 53.65% | 142 bp | 17% |
| AD3392_R1 | 5.3  | 0.93  | 21.36% | 146 bp | 8%  |
| AD3392_R2 | 5.3  | 0.93  | 21.36% | 147 bp | 14% |
| AD3393_R1 | 1.1  | 0.39  | 50.98% | 134 bp | 15% |
| AD3393_R2 | 1.1  | 0.39  | 50.98% | 135 bp | 20% |
| AD3394_R1 | 1.9  | 1.17  | 76.66% | 127 bp | 29% |
| AD3394_R2 | 1.9  | 1.17  | 76.66% | 130 bp | 31% |
| AD3397_R1 | 1    | 0.76  | 95.23% | 101 bp | 48% |
| AD3397_R2 | 1    | 0.76  | 95.23% | 105 bp | 46% |
| AD3399_R1 | 10.7 | 8.14  | 92.83% | 106 bp | 50% |
| AD3399_R2 | 10.7 | 8.14  | 92.83% | 111 bp | 48% |
| AD3403_R1 | 0.2  | 0.13  | 70.04% | 138 bp | 30% |
| AD3403_R2 | 0.2  | 0.13  | 70.04% | 139 bp | 32% |
| AD3405_R1 | 2.2  | 1.22  | 72.13% | 103 bp | 51% |
| AD3405_R2 | 2.2  | 1.22  | 72.13% | 107 bp | 49% |
| AD3406_R1 | 23.8 | 19.24 | 94.47% | 112 bp | 50% |
| AD3406_R2 | 23.8 | 19.24 | 94.47% | 115 bp | 48% |
| AD3407_R1 | 10.8 | 7.54  | 92.12% | 105 bp | 51% |
| AD3407_R2 | 10.8 | 7.54  | 92.12% | 112 bp | 49% |
| AD3408_R1 | 0.3  | 0.14  | 70.73% | 133 bp | 34% |
| AD3408_R2 | 0.3  | 0.14  | 70.73% | 137 bp | 36% |
| AD3409_R1 | 1    | 0.18  | 20.88% | 127 bp | 43% |
| AD3409_R2 | 1    | 0.18  | 20.88% | 129 bp | 42% |
| AD3410_R1 | 5.2  | 3.45  | 92.22% | 98 bp  | 45% |
| AD3410_R2 | 5.2  | 3.45  | 92.22% | 104 bp | 45% |
| AD3411_R1 | 22.3 | 17.10 | 93.97% | 105 bp | 48% |
| AD3411_R2 | 22.3 | 17.10 | 93.97% | 110 bp | 46% |
| AD3412_R1 | 2    | 1.36  | 91.49% | 100 bp | 43% |
| AD3412_R2 | 2    | 1.36  | 91.49% | 106 bp | 41% |

|           |      |       |        |        |     |
|-----------|------|-------|--------|--------|-----|
| AD3413_R1 | 1.8  | 0.62  | 44.35% | 148 bp | 7%  |
| AD3413_R2 | 1.8  | 0.62  | 44.35% | 149 bp | 14% |
| AD3414_R1 | 8.3  | 6.10  | 91.96% | 105 bp | 42% |
| AD3414_R2 | 8.3  | 6.10  | 91.96% | 105 bp | 42% |
| AD3415_R1 | 1.7  | 0.74  | 53.35% | 142 bp | 17% |
| AD3415_R2 | 1.7  | 0.74  | 53.35% | 143 bp | 22% |
| AD3416_R1 | 1.4  | 0.55  | 46.59% | 122 bp | 49% |
| AD3416_R2 | 1.4  | 0.55  | 46.59% | 125 bp | 48% |
| AD3417_R1 | 0.5  | 0.23  | 68.66% | 104 bp | 44% |
| AD3417_R2 | 0.5  | 0.23  | 68.66% | 110 bp | 42% |
| AD3418_R1 | 0.3  | 0.12  | 54.48% | 146 bp | 13% |
| AD3418_R2 | 0.3  | 0.12  | 54.48% | 147 bp | 19% |
| AD3420_R1 | 4.8  | 3.66  | 95.16% | 99 bp  | 50% |
| AD3420_R2 | 4.8  | 3.66  | 95.16% | 105 bp | 47% |
| AD3421_R1 | 3.6  | 2.78  | 86.18% | 130 bp | 43% |
| AD3421_R2 | 3.6  | 2.78  | 86.18% | 131 bp | 42% |
| AD3422_R1 | 22.7 | 17.15 | 88.97% | 109 bp | 52% |
| AD3422_R2 | 22.7 | 17.15 | 88.97% | 112 bp | 50% |
| AD3424_R1 | 18.4 | 14.80 | 96.58% | 104 bp | 49% |
| AD3424_R2 | 18.4 | 14.80 | 96.58% | 107 bp | 47% |

**Supplementary Table-S4:** Differentially expressed genes in *Cutibacterium acne* high versus low sub-group of papillary thyroid cancer samples (n=40). Padj is p-values, adjusted for multiple testing with the Benjamini-Hochberg procedure.

| Gene name       | log2FoldChange | pvalue   | padj     |
|-----------------|----------------|----------|----------|
| REXO1L6P        | 27.47924344    | 9.95E-21 | 1.85E-18 |
| EFHD2           | 26.9683621     | 5.84E-31 | 7.07E-28 |
| HSPA1A          | 26.4241844     | 2.81E-19 | 3.86E-17 |
| GOLGA8T         | 25.86987939    | 1.55E-18 | 2.06E-16 |
| ENSG00000254701 | 25.61870751    | 3.34E-18 | 4.30E-16 |
| MSH5            | 25.42672298    | 5.96E-18 | 7.52E-16 |
| DYRK1A          | 25.06620054    | 1.69E-17 | 2.07E-15 |
| NAIPP4          | 24.818869      | 3.67E-17 | 4.35E-15 |
| ABCF1           | 24.81586989    | 3.70E-17 | 4.35E-15 |
| POMP            | 24.66486458    | 5.79E-17 | 6.68E-15 |
| ENSG00000255292 | 24.36997461    | 1.37E-16 | 1.43E-14 |
| SNRPCP6         | 24.35957267    | 1.42E-16 | 1.46E-14 |
| SLC35A1         | 24.09572515    | 3.08E-16 | 2.72E-14 |
| ENSG00000259665 | 23.36779515    | 2.54E-15 | 2.01E-13 |
| PRAMEF31P       | 23.13686985    | 4.90E-15 | 3.70E-13 |
| ENSG00000185641 | 22.50003188    | 2.90E-14 | 2.12E-12 |
| BCLAF1P2        | 22.35291423    | 4.38E-14 | 3.12E-12 |
| IL5RA           | 22.0578668     | 8.83E-14 | 5.97E-12 |



|                 |             |             |             |
|-----------------|-------------|-------------|-------------|
| ACOXL           | 21.78287539 | 1.82E-13    | 1.16E-11    |
| PDXP            | 20.47932803 | 4.62E-12    | 2.22E-10    |
| SH3D21          | 12.47837555 | 2.27E-05    | 0.000337783 |
| USP17L13        | 10.73079739 | 0.000267414 | 0.002257166 |
| GRIK3           | 9.979736414 | 0.000684268 | 0.004614137 |
| FAT3            | 9.294784691 | 0.001607744 | 0.008862329 |
| EFCAB5          | 9.037334287 | 0.001861726 | 0.009940153 |
| ENSG00000238015 | 8.491292417 | 0.003996379 | 0.017989865 |
| ACO2            | 8.260610762 | 0.005183753 | 0.022147597 |
| IGBP1           | 8.225187046 | 0.005322532 | 0.022589037 |
| CD302           | 7.996648075 | 0.00647356  | 0.026141569 |
| SLC2A10         | 7.839562687 | 0.008141394 | 0.031204378 |
| SPATA21         | 7.76931594  | 0.008550452 | 0.032362313 |
| CLEC18A         | 7.743362168 | 0.007853607 | 0.030360926 |
| H2BC19P         | 7.45451145  | 0.010522953 | 0.037958708 |
| ENSG00000278931 | 7.331779327 | 0.009597865 | 0.035440074 |
| TUBBP1          | 7.265563319 | 0.006603274 | 0.026567238 |
| ENSG00000235018 | 7.122554823 | 0.0160641   | 0.052360437 |
| ENSG00000226945 | 6.964342354 | 0.018628695 | 0.05856699  |
| HLA-F           | 6.937131977 | 0.019100134 | 0.059661426 |
| RPS27P23        | 6.937131977 | 0.019100134 | 0.059661426 |
| SSC5D           | 6.692972442 | 0.022634828 | 0.06787948  |
| CCNJ            | 6.602829123 | 0.015785975 | 0.05178142  |
| NRIP2           | 6.516867042 | 0.007596027 | 0.029583055 |
| TRIM53BP        | 6.513863021 | 0.027959567 | NA          |
| EIF4A1P10       | 6.496599574 | 0.028392053 | NA          |
| ENSG00000235371 | 6.471440077 | 0.029014435 | 0.08201558  |
| ABCB11          | 6.43029106  | 0.030071581 | NA          |
| SLC14A1         | 6.402465334 | 0.030700139 | 0.085522321 |
| RPL9P31         | 6.355558174 | 0.032076299 | NA          |
| FAM189A2        | 6.337008958 | 0.002410696 | 0.012132666 |
| ACTR2           | 6.319949094 | 0.030566519 | 0.085307158 |
| MAVS            | 6.248618401 | 0.000532601 | 0.003787665 |
| CDS1            | 6.244346695 | 0.035274181 | NA          |
| LRPPRC          | 6.229097288 | 0.035562263 | NA          |
| TATDN2P3        | 6.190569112 | 0.036915194 | NA          |
| ERVW-1          | 6.149666063 | 0.000845898 | 0.0054116   |
| DUX4L26         | 6.061456374 | 0.001438813 | 0.008183927 |
| HLA-DRA         | 6.028465581 | 0.03806212  | 0.099741048 |
| PCDHA7          | 5.994089737 | 0.009842346 | 0.036172153 |
| TM2D2           | 5.988727727 | 0.01613467  | 0.052512516 |
| ENSG00000270870 | 5.931393887 | 0.045787104 | NA          |
| ZC3H7B          | 5.917458363 | 0.000159222 | 0.001517501 |
| OR4A9P          | 5.868345642 | 0.048193196 | NA          |

|                 |             |             |             |
|-----------------|-------------|-------------|-------------|
| PLCB4           | 5.849259172 | 0.012831853 | 0.044275016 |
| RPL29P14        | 5.838799007 | 0.03590953  | 0.09563266  |
| MGAT3           | 5.816434552 | 0.050256307 | NA          |
| SLC22A18        | 5.801773383 | 0.048536897 | 0.119651853 |
| CDH12           | 5.7967074   | 0.005245679 | 0.022349067 |
| LIN7C           | 5.627302739 | 0.043060913 | NA          |
| USP12P2         | 5.518246614 | 0.012644201 | NA          |
| RAB1A           | 5.303685298 | 0.012028251 | 0.042102356 |
| CMBL            | 5.300439077 | 0.031062281 | 0.086202157 |
| SKINT1L         | 5.283529575 | 0.000447767 | 0.003302725 |
| KMO             | 5.193512995 | 0.030944297 | 0.085984795 |
| CEP162          | 5.118235087 | 0.002524774 | 0.012576075 |
| ZFP30           | 4.806963691 | 0.019865276 | 0.061495983 |
| PGM5            | 4.699858101 | 0.027100368 | 0.077989265 |
| ZNF169          | 4.627437637 | 0.034201436 | 0.092300603 |
| CYSLTR2         | 4.602749651 | 0.011406282 | 0.040403907 |
| ENSG00000225813 | 4.563984966 | 0.048725266 | NA          |
| MUC4            | 4.555215441 | 0.044172018 | 0.111363904 |
| TAC4            | 4.510753788 | 0.042953021 | 0.109136198 |
| SDF4            | 4.467182006 | 0.001906845 | 0.010138374 |
| C1orf216        | 4.3412239   | 0.043016876 | NA          |
| COL1A2          | 4.29080216  | 0.000981662 | 0.006084019 |
| ARHGEF5         | 4.276158529 | 0.046360621 | 0.115629292 |
| RPS18           | 4.24837748  | 5.54E-05    | 0.000682265 |
| S100A1          | 4.22672452  | 0.043503011 | 0.110182139 |
| RIPPLY3         | 4.14945536  | 0.049623407 | NA          |
| PHIP            | 4.113907809 | 0.024939291 | 0.073037789 |
| VGLL4           | 4.113030042 | 0.003877014 | 0.017556073 |
| PSMA5           | 4.099835581 | 0.028707774 | 0.081434005 |
| TESC            | 4.06060311  | 0.041188248 | 0.105668198 |
| POLR3H          | 3.987727928 | 0.008282647 | 0.031643076 |
| HEATR5A         | 3.937274191 | 0.001129407 | 0.006778782 |
| PDE4DIPP6       | 3.92117272  | 0.022436113 | NA          |
| PNN             | 3.908956384 | 0.023191001 | 0.069138884 |
| ZNF236          | 3.89847878  | 0.039931829 | 0.103365024 |
| BAG6            | 3.892900318 | 0.049219891 | 0.120882398 |
| GGT1            | 3.889344271 | 0.012127283 | 0.042326597 |
| UBAC2           | 3.846096974 | 0.006980463 | 0.027747628 |
| SPP2            | 3.8376444   | 0.032005898 | NA          |
| CALM2           | 3.834135891 | 0.009919457 | 0.036359931 |
| MUC6            | 3.823357152 | 0.017732725 | 0.056430939 |
| NFAT5           | 3.792031922 | 0.030431085 | 0.085066479 |
| POLR2A          | 3.778165268 | 0.032756627 | 0.089520481 |
| SLC2A4RG        | 3.77585411  | 0.008403565 | 0.031956252 |

|                 |             |             |             |
|-----------------|-------------|-------------|-------------|
| ABHD17A         | 3.769504434 | 0.038887475 | 0.101333477 |
| SUPT16H         | 3.689532309 | 0.016378745 | 0.053127941 |
| PDAP1           | 3.674477248 | 0.033590541 | 0.091120552 |
| GIGYF2          | 3.661806479 | 0.002254108 | 0.011508055 |
| ZNF580          | 3.570886466 | 0.039764562 | 0.103127378 |
| STAM2           | 3.509914886 | 0.016434039 | 0.05327199  |
| AQP6            | 3.506137416 | 0.037902524 | NA          |
| CROT            | 3.484460308 | 0.021432373 | 0.065131169 |
| INGX            | 3.454390293 | 0.021259201 | NA          |
| FARSA           | 3.445674554 | 0.022065679 | 0.066537863 |
| RPL5            | 3.437019635 | 0.026264839 | 0.076054932 |
| ENSG00000254503 | 3.43286737  | 0.043550823 | NA          |
| NONO            | 3.42922947  | 0.006120034 | 0.025009078 |
| AP3D1           | 3.423492269 | 0.007400814 | 0.02898722  |
| MED16           | 3.412283488 | 0.018119972 | 0.057459823 |
| HLA-V           | 3.385775048 | 0.000221835 | 0.001955639 |
| PKD1P1          | 3.380942299 | 0.043589504 | 0.110331944 |
| RIN1            | 3.380032375 | 0.048853883 | 0.120188496 |
| RPL26           | 3.330984128 | 0.023461196 | 0.069714462 |
| COL16A1         | 3.313864233 | 0.006866736 | 0.02738247  |
| IL17RA          | 3.304823771 | 0.048602095 | 0.119763795 |
| ARHGAP44        | 3.298852622 | 0.022492477 | 0.067589112 |
| EPS8L1          | 3.293746919 | 0.012143822 | 0.042359892 |
| RDH13           | 3.291026852 | 0.016447257 | 0.053291115 |
| RPS16           | 3.284264908 | 0.016919025 | 0.054435908 |
| TP53BP1         | 3.282337124 | 0.003636314 | 0.016703585 |
| ATXN7L3         | 3.224861993 | 0.028980368 | 0.081976717 |
| TENM4           | 3.209962467 | 0.038335048 | 0.100304241 |
| SBNO2           | 3.205213783 | 0.005826545 | 0.024102701 |
| HERC1           | 3.196980867 | 0.002517475 | 0.012560393 |
| TSC2            | 3.191456609 | 0.021707324 | 0.065765563 |
| TLL2            | 3.190262015 | 0.040574267 | NA          |
| LINC00672       | 3.180861844 | 0.025932151 | NA          |
| MAGI1           | 3.17016109  | 0.005664361 | 0.023650027 |
| UQCRC1          | 3.142729675 | 0.014273942 | 0.047872485 |
| QTRT1           | 3.126729319 | 0.04200491  | 0.107349304 |
| P2RX5-TAX1BP3   | 3.111728063 | 0.010970791 | 0.039182784 |
| SNF8            | 3.09338707  | 0.020735147 | 0.063570978 |
| PIGQ            | 3.078041015 | 0.013365794 | 0.045635987 |
| GABBR1          | 3.069991899 | 0.021892219 | 0.06616315  |
| GTDC1           | 3.069698577 | 0.028535096 | 0.081058155 |
| FRMPD1          | 3.06015746  | 0.000536837 | 0.00380884  |
| TCIRG1          | 3.054525462 | 0.01525178  | 0.050453006 |
| SPECC1          | 3.032013626 | 0.010094322 | 0.036812797 |

|          |             |             |             |
|----------|-------------|-------------|-------------|
| RNF227   | 3.031227658 | 0.003026611 | 0.014508553 |
| PLXNB2   | 3.028342966 | 0.001681513 | 0.009162369 |
| MYCBP2   | 3.027660375 | 0.033244406 | 0.090445108 |
| NSFL1C   | 3.016652675 | 0.046988308 | 0.11685771  |
| NEPRO    | 3.007721223 | 0.049298363 | 0.121012489 |
| HMG20B   | 2.966969185 | 0.017770006 | 0.056512914 |
| POLR3E   | 2.956838177 | 0.046381661 | 0.115657936 |
| IRS3P    | 2.954259971 | 0.007085548 | 0.028045608 |
| LTBP3    | 2.911804964 | 0.00763008  | 0.02966816  |
| DGLUCY   | 2.904487472 | 0.032274921 | 0.088584047 |
| SNX25    | 2.893537129 | 0.027638981 | 0.079256627 |
| ATP2B4   | 2.892619246 | 0.010741722 | 0.038489582 |
| CD63     | 2.887579849 | 0.003562544 | 0.01644978  |
| MYO1C    | 2.85257506  | 0.030878885 | 0.085881898 |
| CEP170   | 2.851755184 | 0.015536391 | 0.051087334 |
| WASH6P   | 2.851337611 | 0.024616803 | 0.072426296 |
| ADCY6    | 2.845763403 | 0.042687431 | 0.108589503 |
| SRRT     | 2.834959012 | 0.023182114 | 0.069129418 |
| SRRM2    | 2.822566185 | 3.18E-05    | 0.000438339 |
| KIAA0232 | 2.81831806  | 0.0324567   | 0.088872185 |
| PAXBP1   | 2.81724523  | 0.045869894 | 0.114783792 |
| SCRN2    | 2.781961893 | 0.025307875 | 0.073820468 |
| RHOC     | 2.779517604 | 0.013763863 | 0.046574727 |
| DMXL1    | 2.772328002 | 0.004224497 | 0.018840572 |
| GON4L    | 2.765738623 | 0.034558812 | 0.092996855 |
| RSRP1    | 2.714517266 | 0.008775927 | 0.032999013 |
| PGGHG    | 2.705466    | 0.033542067 | 0.091050275 |
| DACT3    | 2.699303655 | 0.007571014 | 0.029513543 |
| SHFL     | 2.695062582 | 0.040354267 | 0.104137771 |
| RPL6     | 2.644074365 | 0.01859499  | 0.058521518 |
| ATRNL1   | 2.629358873 | 0.041980832 | 0.107314887 |
| EPOR     | 2.627216137 | 0.027208125 | 0.078224976 |
| SDHAP1   | 2.595213041 | 0.029256436 | 0.082487747 |
| CHFR     | 2.590920725 | 0.03726897  | 0.098140998 |
| SLC4A8   | 2.587538986 | 0.00091319  | 0.005750908 |
| TMTC2    | 2.559210415 | 0.036444161 | 0.096546316 |
| LDHB     | 2.538840051 | 0.032588675 | 0.089121854 |
| GNAS     | 2.538128088 | 0.003744329 | 0.017070189 |
| GRINA    | 2.530024593 | 0.042694766 | 0.108589503 |
| HDLBP    | 2.529214575 | 1.96E-06    | 4.11E-05    |
| ITGA3    | 2.509310068 | 0.013878918 | 0.046833125 |
| LMO7     | 2.494455091 | 0.007885809 | 0.030456233 |
| C12orf43 | 2.493610898 | 0.047298223 | 0.117459518 |
| BCAM     | 2.463631273 | 0.049298793 | 0.121012489 |

|                 |             |             |             |
|-----------------|-------------|-------------|-------------|
| TNKS1BP1        | 2.425360687 | 0.024807666 | 0.072687484 |
| SEMA6B          | 2.417227031 | 0.021076608 | 0.064296544 |
| ATP11A          | 2.407359847 | 0.012718252 | 0.043970785 |
| EEF1A1P5        | 2.405638245 | 0.01092843  | 0.039089158 |
| RACK1           | 2.402897675 | 0.00189543  | 0.010088958 |
| USP34           | 2.400551222 | 0.040072477 | 0.103551935 |
| PLD3            | 2.398792269 | 0.023594071 | 0.069984025 |
| LRP1            | 2.370839623 | 0.047236255 | 0.117391932 |
| PML             | 2.357156472 | 0.048312918 | 0.119237273 |
| MDN1            | 2.331514233 | 0.010680383 | 0.038326521 |
| SPG11           | 2.331451026 | 0.00997216  | 0.036477192 |
| SYNE2           | 2.307786759 | 0.001580864 | 0.008769375 |
| ZMYM2           | 2.278378422 | 0.017932969 | 0.056926476 |
| ENSG00000271519 | 2.251291516 | 0.00934827  | 0.034698395 |
| BRWD1           | 2.234596375 | 0.044159022 | 0.111359162 |
| MAPK12          | 2.220345907 | 0.019231467 | 0.060025187 |
| DNM1P47         | 2.219575046 | 0.049808332 | 0.121966427 |
| ATXN2L          | 2.202903509 | 0.014483439 | 0.048387397 |
| INTS10          | 2.199614474 | 0.035177524 | 0.094368073 |
| TMEM138         | 2.182298867 | 0.01006114  | 0.036766669 |
| ZNF556          | 2.173517047 | 0.025546239 | 0.074365481 |
| LRIG3           | 2.154297948 | 0.036393569 | 0.096451928 |
| NFE2L1          | 2.15146912  | 0.042821059 | 0.108842104 |
| FN1             | 2.127964561 | 0.039799314 | 0.103127378 |
| DDX39B          | 2.087672009 | 0.015728129 | 0.051633652 |
| RASEF           | 2.06556088  | 0.000202948 | 0.001822316 |
| LAIR1           | 2.054219328 | 0.021859386 | 0.06608042  |
| CABIN1          | 2.050431627 | 0.014196686 | 0.04770591  |
| HNRNPH1         | 2.042470567 | 0.038705046 | 0.1010539   |
| ARHGAP5         | 1.998790445 | 0.0038752   | 0.017554424 |
| ATP2A2          | 1.97432198  | 0.050531382 | 0.123412398 |
| ALDOA           | 1.968292173 | 0.042073668 | 0.107461423 |
| KBTBD12         | 1.962371529 | 0.006664065 | 0.026752753 |
| MYO15B          | 1.935881243 | 0.000818773 | 0.005274307 |
| RGL3            | 1.9214744   | 0.015442234 | 0.050834182 |
| NPIP5           | 1.908013202 | 0.020598425 | 0.063199833 |
| PCDH11Y         | 1.897765016 | 0.012120212 | 0.042314118 |
| LTBP4           | 1.885702431 | 0.040602802 | 0.104520695 |
| ENSG00000283809 | 1.880300892 | 0.004519652 | 0.019856939 |
| SPINK9          | 1.847193145 | 0.039165591 | 0.101882724 |
| GAPDH           | 1.795861437 | 0.042274924 | 0.10783892  |
| MLLT6           | 1.738391026 | 0.048845613 | 0.120188496 |
| ACSL6           | 1.712934983 | 0.024493954 | 0.072134992 |
| RPL13A          | 1.674511167 | 0.029029996 | 0.082040409 |

|          |              |             |             |
|----------|--------------|-------------|-------------|
| EXD1     | 1.614707665  | 0.033996585 | 0.091897726 |
| RPL10    | 1.536863376  | 0.030624681 | 0.085371058 |
| TMEM212  | 1.522315789  | 0.045388243 | 0.113813816 |
| SLC25A29 | -1.377893363 | 0.017205028 | 0.05507793  |
| NPIPA1   | -1.464495679 | 0.050517314 | 0.123402939 |
| ANKRD12  | -1.820896423 | 0.023481639 | 0.069714462 |
| MORC4    | -1.822545196 | 0.01109092  | 0.039553476 |
| MAP4     | -1.846480576 | 0.04266902  | 0.108569648 |
| SUCO     | -1.892122437 | 0.041769537 | 0.10691023  |
| DCBLD2   | -1.913788869 | 0.032608263 | 0.089155277 |
| ACLY     | -1.936342679 | 0.043573854 | 0.110331944 |
| KDM3B    | -1.947358986 | 0.047852874 | 0.118448095 |
| ACAA1    | -1.972453702 | 0.045669446 | 0.114353119 |
| SLC38A9  | -2.040482262 | 0.045234285 | 0.113498298 |
| GGA2     | -2.063640518 | 0.040591693 | 0.104514327 |
| MIPOL1   | -2.125022708 | 0.028469589 | 0.080929052 |
| HPCAL1   | -2.133856727 | 0.0479127   | 0.118547694 |
| CHD2     | -2.146178324 | 0.034135138 | 0.09216411  |
| TOR1AIP2 | -2.160459213 | 0.00900867  | 0.033736425 |
| DYNC2I1  | -2.166406101 | 0.04941965  | 0.121210831 |
| ADAMTSL3 | -2.172882839 | 0.03234096  | 0.088704959 |
| ZNF2     | -2.183508613 | 0.040033473 | 0.103495336 |
| CAMSAP2  | -2.184851073 | 0.049680725 | 0.121727833 |
| NXN      | -2.204648422 | 0.046854254 | 0.116572227 |
| RAD50    | -2.208300218 | 0.048407054 | 0.119380397 |
| ZNF148   | -2.21234607  | 0.041955567 | 0.107272959 |
| PPP2R5C  | -2.214265194 | 0.014959445 | 0.049730602 |
| S100BPB  | -2.218113618 | 0.024527085 | 0.072197432 |
| ATP1B1   | -2.218278156 | 0.050292005 | 0.122976653 |
| ZNF655   | -2.220753123 | 0.014817367 | 0.049326021 |
| FAM120A  | -2.23416475  | 0.046324297 | 0.115562509 |
| JUP      | -2.250855475 | 0.039490937 | 0.102486772 |
| ABCC10   | -2.258392979 | 0.008628767 | 0.032567069 |
| LARS1    | -2.289633374 | 0.04408369  | 0.111233892 |
| KANK2    | -2.316512648 | 0.016379232 | 0.053127941 |
| USF2     | -2.318877909 | 0.035791995 | 0.095466352 |
| C2CD5    | -2.322448232 | 0.022435543 | 0.067485043 |
| ACAP2    | -2.32329344  | 0.036021577 | 0.095783209 |
| EEF1A1P6 | -2.323906231 | 0.023697661 | 0.070148323 |
| MCM3AP   | -2.327049579 | 0.018594762 | 0.058521518 |
| TNS3     | -2.339700387 | 0.027805659 | 0.079576548 |
| NELFCD   | -2.35174111  | 0.041178151 | 0.105664689 |
| PIDD1    | -2.366368106 | 0.022206842 | 0.066913521 |
| ZNF268   | -2.370968664 | 0.04339855  | 0.110009644 |

|           |              |             |             |
|-----------|--------------|-------------|-------------|
| SORBS3    | -2.371622706 | 0.015360047 | 0.050672667 |
| PPM1F     | -2.371765457 | 0.038787725 | 0.101182461 |
| G3BP2     | -2.372420344 | 0.016965    | 0.054498714 |
| TNFRSF12A | -2.37877945  | 0.011860058 | 0.041658195 |
| MTMR12    | -2.396589366 | 0.042728254 | 0.108651845 |
| DROSHA    | -2.399234399 | 0.038348407 | 0.100317511 |
| ARF1      | -2.410205243 | 0.039426045 | 0.102384219 |
| CARNMT1   | -2.411932972 | 0.028339379 | 0.080710551 |
| HNRNP3    | -2.414672277 | 0.024775602 | 0.072646289 |
| PI4KB     | -2.420809832 | 0.006271813 | 0.025508743 |
| LIMK1     | -2.420955628 | 0.044539102 | 0.112055974 |
| TIPARP    | -2.443306908 | 0.043700236 | 0.11047484  |
| DOCK7     | -2.444660273 | 0.044079782 | 0.111233892 |
| BTBD7     | -2.450540697 | 0.035572677 | 0.095090919 |
| SUCLG1    | -2.455218654 | 0.018621098 | 0.05856699  |
| GRHL2     | -2.457623819 | 0.018771362 | 0.058882338 |
| ULK1      | -2.461490518 | 0.048235858 | 0.119103799 |
| VDAC1     | -2.46225261  | 0.048775748 | 0.120069484 |
| LRPAP1    | -2.462816032 | 0.021813526 | 0.065969493 |
| NUB1      | -2.464390418 | 0.014439065 | 0.048265794 |
| PRMT1     | -2.466071955 | 0.039315297 | 0.102139811 |
| IKZF2     | -2.4671861   | 0.043614946 | 0.11037326  |
| ZMYND8    | -2.47037944  | 0.045822783 | 0.114689612 |
| EYA3      | -2.47038719  | 0.047267683 | 0.117407765 |
| NBR1      | -2.470537891 | 0.027745674 | 0.079506069 |
| HEATR1    | -2.476554485 | 0.023686314 | 0.070131884 |
| ISG20L2   | -2.47698193  | 0.020617113 | 0.06324114  |
| NRBP2     | -2.479885519 | 0.016313389 | 0.052979961 |
| NEMF      | -2.483672528 | 0.016093482 | 0.052406646 |
| ATP5MC2   | -2.488030884 | 0.024706016 | 0.072570554 |
| RAPGEF2   | -2.492847419 | 0.025911164 | 0.075246817 |
| TRMU      | -2.497574357 | 0.048875026 | 0.120191652 |
| RPL21P135 | -2.499761983 | 0.029675676 | 0.083397814 |
| LUC7L2    | -2.507501244 | 0.039961746 | 0.1033917   |
| LRRC37A3  | -2.511383535 | 0.040359409 | 0.104137771 |
| TSPAN3    | -2.525223151 | 0.016220618 | 0.052749694 |
| ZNF587    | -2.525878947 | 0.020505956 | 0.062948034 |
| BLNK      | -2.527408295 | 0.042533999 | 0.108322832 |
| HBP1      | -2.536845828 | 0.048485119 | 0.11954856  |
| DNAJA2    | -2.53808788  | 0.030535187 | 0.085247604 |
| WSB2      | -2.538120892 | 0.050989259 | 0.124304933 |
| EHBP1     | -2.540971298 | 0.046666257 | 0.116200035 |
| CLK4      | -2.542443847 | 0.043380571 | 0.110009644 |
| RUFY2     | -2.543900406 | 0.050831958 | 0.123996375 |

|          |              |             |             |
|----------|--------------|-------------|-------------|
| ASAP1    | -2.555995872 | 0.024720522 | 0.072580512 |
| ZNF334   | -2.566339419 | 0.019833721 | 0.061461179 |
| UBXN1    | -2.567974061 | 0.008385873 | 0.031929099 |
| UBN1     | -2.573166866 | 0.043051968 | 0.109337184 |
| CRYZL1   | -2.574837945 | 0.025559238 | 0.074385434 |
| TMEM175  | -2.579581584 | 0.03925249  | 0.102042985 |
| USP25    | -2.581771325 | 0.022966027 | 0.0686145   |
| NIN      | -2.586041741 | 0.031476334 | 0.087063426 |
| ZC3H14   | -2.587965777 | 0.021153722 | 0.064494874 |
| BTG2     | -2.591808227 | 0.029655724 | 0.083361097 |
| MED14    | -2.598516592 | 0.03158314  | 0.08721933  |
| ZNF519   | -2.599283058 | 0.033773343 | 0.091458681 |
| ACAP1    | -2.600880196 | 0.037533191 | 0.098654015 |
| MCFD2    | -2.600881851 | 0.016733404 | 0.053996566 |
| UBXN4    | -2.603387552 | 0.014968684 | 0.049747654 |
| SUZ12    | -2.605263785 | 0.023642254 | 0.070018556 |
| ANKRD13C | -2.608653229 | 0.023877114 | 0.070558737 |
| SIPA1L3  | -2.609940174 | 0.027882564 | 0.079726426 |
| PDXK     | -2.610913247 | 0.041345608 | 0.105986983 |
| TTC39B   | -2.613205455 | 0.021311222 | 0.064828105 |
| FNDC3A   | -2.619450866 | 0.00924914  | 0.034426698 |
| SUZ12P1  | -2.620707178 | 0.029902865 | 0.083943059 |
| RECQL5   | -2.621169014 | 0.039065579 | 0.101666259 |
| PHF20    | -2.624509218 | 0.042200626 | 0.107717498 |
| PRR14L   | -2.624679367 | 0.013460001 | 0.045868002 |
| LTB4R    | -2.626996229 | 0.048003558 | 0.118691889 |
| TMEM98   | -2.630382898 | 0.045204888 | 0.113448053 |
| MXI1     | -2.630582512 | 0.043638857 | 0.110387613 |
| LIN54    | -2.632137693 | 0.047765004 | 0.11828686  |
| RANBP1   | -2.632494565 | 0.038043712 | 0.099714398 |
| MNT      | -2.6396329   | 0.046265253 | 0.115439006 |
| NOL8     | -2.639760168 | 0.035000125 | 0.093996342 |
| TEP1     | -2.644706077 | 0.015890331 | 0.052010993 |
| DOCK10   | -2.645632482 | 0.048319466 | 0.119237273 |
| CNOT4    | -2.647903935 | 0.025088778 | 0.073404535 |
| XBP1     | -2.649645429 | 0.024337151 | 0.071708102 |
| NSUN4    | -2.650753204 | 0.047251611 | 0.117391932 |
| CTDSP2   | -2.651264024 | 0.034177374 | 0.092257567 |
| BFAR     | -2.652728948 | 0.049225821 | 0.120882398 |
| NDRG2    | -2.653188727 | 0.037106116 | 0.097850202 |
| MAN1A2   | -2.656401316 | 0.009088573 | 0.033932169 |
| VWA8     | -2.661906247 | 0.027460419 | 0.078837978 |
| NUP155   | -2.662033695 | 0.023100946 | 0.068955326 |
| PSME1    | -2.663245395 | 0.050291761 | 0.122976653 |



|                 |              |             |             |
|-----------------|--------------|-------------|-------------|
| RBM10           | -2.667752671 | 0.044456343 | 0.111894276 |
| NOLC1           | -2.671598074 | 0.029438404 | 0.082904243 |
| ENSG00000225840 | -2.671911731 | 0.000166687 | 0.001568876 |
| DEGS1           | -2.67658779  | 0.033288123 | 0.090543695 |
| CYP3A5          | -2.677012792 | 0.003156551 | 0.014971353 |
| PBRM1           | -2.677898586 | 0.010158468 | 0.03697988  |
| ARRDC1          | -2.683256374 | 0.038588357 | 0.100792722 |
| MEF2D           | -2.686342811 | 0.015329147 | 0.050598308 |
| NAV3            | -2.688621626 | 0.01343213  | 0.045823705 |
| CLN3            | -2.698799075 | 0.022468013 | 0.067532877 |
| ZCCHC8          | -2.702478396 | 0.02195835  | 0.066280267 |
| ZNF783          | -2.702824721 | 0.016795299 | 0.054181851 |
| MINK1           | -2.703417785 | 0.017621476 | 0.056217802 |
| VPS45           | -2.705774916 | 0.04716311  | 0.117244257 |
| PBX2            | -2.70815427  | 0.005236148 | 0.022316314 |
| CARS2           | -2.713089831 | 0.040697398 | 0.104700417 |
| PRR13           | -2.714985542 | 0.033008757 | 0.08994552  |
| ITPRID2         | -2.716946686 | 0.01500762  | 0.049836003 |
| MBD2            | -2.717279798 | 0.022441803 | 0.067487102 |
| PACSIN2         | -2.718614869 | 0.02977347  | 0.083614404 |
| FAM172A         | -2.719776352 | 0.025187873 | 0.0735829   |
| NCOA7           | -2.724110094 | 0.024647089 | 0.072470354 |
| ANP32A          | -2.728773768 | 0.022346302 | 0.067283493 |
| NBPF8           | -2.730621764 | 0.03677785  | 0.09719631  |
| CTSD            | -2.734855668 | 0.023444421 | 0.069714462 |
| TEX9            | -2.734979903 | 0.045646963 | 0.11434413  |
| SHARPIN         | -2.738244471 | 0.039690279 | 0.102982022 |
| LINC02210       | -2.739469652 | 0.038004702 | 0.099633726 |
| ZNF394          | -2.744679137 | 0.04766594  | 0.118130331 |
| USP36           | -2.747593729 | 0.047348788 | 0.11753686  |
| PRKD3           | -2.750706816 | 0.04023874  | 0.103892856 |
| IQC�            | -2.75330542  | 0.030111487 | 0.08438746  |
| ATP6V1D         | -2.759592747 | 0.034452373 | 0.092813603 |
| ZNF264          | -2.771998907 | 0.017136597 | 0.054924826 |
| HLA-DQA1        | -2.774133498 | 0.012231464 | 0.042628746 |
| ARHGEF26        | -2.774703473 | 0.02582465  | 0.075031579 |
| CDK5RAP2        | -2.776050034 | 0.024990628 | 0.073152734 |
| PPHLN1          | -2.776441894 | 0.027888441 | 0.079726426 |
| COQ8B           | -2.777534136 | 0.032962933 | 0.089901608 |
| TMF1            | -2.781383316 | 0.034731839 | 0.093400173 |
| MYO1D           | -2.781485802 | 0.032334361 | 0.088704959 |
| CEP70           | -2.782745358 | 0.01358472  | 0.046110334 |
| ZNF117          | -2.78335495  | 0.020306496 | 0.06243074  |
| FAM133B         | -2.783521409 | 0.02791547  | 0.079784852 |

|                 |              |             |             |
|-----------------|--------------|-------------|-------------|
| ACACA           | -2.78473949  | 0.004697773 | 0.020483372 |
| REXO2           | -2.785928683 | 0.04610793  | 0.115165165 |
| ZMAT3           | -2.788057979 | 0.012070443 | 0.042225607 |
| DAP3            | -2.789569841 | 0.03604269  | 0.095801874 |
| CEP128          | -2.792295567 | 0.047996826 | 0.118691889 |
| CD164           | -2.793100424 | 0.018655144 | 0.058588962 |
| PPOX            | -2.795942943 | 0.046811898 | 0.116490791 |
| IPO11           | -2.797757345 | 0.041199055 | 0.105673525 |
| PNPT1           | -2.797867248 | 0.000377568 | 0.002890625 |
| PPP2CA          | -2.802255567 | 0.035027086 | 0.094027024 |
| HSD17B12        | -2.806988794 | 0.016912903 | 0.054435908 |
| DNM1            | -2.808716845 | 0.030997351 | 0.086092688 |
| TIMM44          | -2.808944132 | 0.036559492 | 0.096774178 |
| DIP2B           | -2.809971359 | 0.011394873 | 0.040399396 |
| CCDC28B         | -2.811397772 | 0.037085784 | 0.097822135 |
| CTDNEP1         | -2.816483402 | 0.03795157  | 0.099537551 |
| PLD2            | -2.816935184 | 0.034481742 | 0.092830739 |
| APPL2           | -2.821513109 | 0.046194686 | 0.115320315 |
| CAPN10          | -2.824174775 | 0.030355509 | 0.084910501 |
| IGFBP5          | -2.825777774 | 0.035546313 | 0.095065438 |
| CLCN3           | -2.827878917 | 0.050248898 | 0.12292091  |
| CBX5            | -2.828967705 | 0.035969225 | 0.095707078 |
| DYSF            | -2.833104677 | 0.033643744 | 0.091203557 |
| KXD1            | -2.835126116 | 0.007040764 | 0.027904847 |
| SYNE3           | -2.836624435 | 0.048764465 | 0.120066127 |
| PSMG2           | -2.839848158 | 0.045889638 | 0.114809463 |
| ENSG00000250575 | -2.841804842 | 0.013892742 | 0.04685365  |
| GRB2            | -2.8447483   | 0.042425218 | 0.108108388 |
| MCL1            | -2.846390921 | 0.016714759 | 0.053950786 |
| WDR86           | -2.848525621 | 0.006842285 | 0.027310733 |
| BCAS3           | -2.855940175 | 0.027314151 | 0.078455263 |
| RBFA            | -2.856072051 | 0.018102062 | 0.057433121 |
| SH3GLB1         | -2.85879942  | 0.021728205 | 0.06578244  |
| PGD             | -2.859184011 | 0.039772449 | 0.103127378 |
| PIP4K2A         | -2.860866827 | 0.021237801 | 0.064702327 |
| SMC6            | -2.863280851 | 0.021050441 | 0.064260919 |
| CNTRL           | -2.863331973 | 0.04030031  | 0.104029634 |
| ENSG00000259948 | -2.865115931 | 0.049215696 | 0.120882398 |
| ZNF780B         | -2.866151734 | 0.032455239 | 0.088872185 |
| R3HDM2          | -2.8673257   | 0.0170072   | 0.054596838 |
| PPP1R21         | -2.868981491 | 0.019750982 | 0.061220457 |
| SYNJ2           | -2.869012622 | 0.010327603 | 0.037415535 |
| RNPC3           | -2.874177326 | 0.005402642 | 0.022856894 |
| KCTD15          | -2.875938822 | 0.034503698 | 0.092869192 |

|                 |              |             |             |
|-----------------|--------------|-------------|-------------|
| ARHGAP45        | -2.877659132 | 0.010088723 | 0.036812797 |
| RRP12           | -2.879376593 | 0.000840413 | 0.005379357 |
| YWHAB           | -2.881503804 | 0.025651111 | 0.074599002 |
| GALNT1          | -2.881829895 | 0.008304889 | 0.03170053  |
| PCED1A          | -2.88295868  | 0.044894268 | 0.112808847 |
| ZNF189          | -2.886546599 | 0.02793608  | 0.079811075 |
| ZNF841          | -2.891296528 | 0.002685861 | 0.013172474 |
| EDC4            | -2.894622208 | 0.034611387 | 0.093117632 |
| NAPB            | -2.895956494 | 0.015271278 | 0.050489906 |
| ZSCAN18         | -2.897976654 | 0.001518168 | 0.00849164  |
| USP8            | -2.898965772 | 0.005373123 | 0.022773715 |
| SSU72           | -2.899169426 | 0.03412302  | 0.092151948 |
| ZHX1            | -2.903998128 | 0.011583342 | 0.040887947 |
| SLMAP           | -2.907938698 | 0.01724218  | 0.055182271 |
| CSPG4P12        | -2.908481323 | 0.008041109 | 0.03091791  |
| PPP1R13L        | -2.909470917 | 0.047411167 | 0.11761934  |
| PLEKHB2         | -2.909668684 | 0.003608508 | 0.016601057 |
| PDCD2           | -2.911004007 | 0.048027338 | 0.118691889 |
| RIC1            | -2.911679249 | 0.009414028 | 0.03491103  |
| RPAP3           | -2.912287051 | 0.044827288 | 0.112687329 |
| DDAH2           | -2.918590083 | 0.019641378 | 0.060943151 |
| CLK3            | -2.91986306  | 0.012581067 | 0.043571169 |
| WBP2            | -2.923554743 | 0.027617031 | 0.079212451 |
| CORO7           | -2.924849104 | 0.045960049 | 0.114937642 |
| TCOF1           | -2.927502641 | 0.050729292 | 0.123770884 |
| PRRT3           | -2.928982908 | 0.029546631 | 0.08310424  |
| LAMA1           | -2.929013689 | 0.018761838 | 0.058878219 |
| EEF1A1P3        | -2.929452395 | 0.04498231  | NA          |
| BCAR1           | -2.930296565 | 0.014870372 | 0.049448071 |
| FHIP2A          | -2.930635498 | 0.015425198 | 0.050818346 |
| TM9SF1          | -2.935440558 | 0.030040363 | 0.084246653 |
| TAP2            | -2.938090414 | 0.039824074 | 0.103152277 |
| MARVELD2        | -2.940234761 | 0.040141958 | 0.103687208 |
| FCHSD2          | -2.941082191 | 0.010396351 | 0.0375999   |
| ALKBH1          | -2.941442689 | 0.041754586 | NA          |
| SEC23A          | -2.94868241  | 0.006113038 | 0.025005817 |
| KIAA1614        | -2.950564334 | 0.02913542  | 0.082242332 |
| FGF7P3          | -2.951913842 | 0.032556478 | 0.089053924 |
| ENSG00000233836 | -2.952084493 | 0.024960328 | 0.073081715 |
| ARHGEF15        | -2.952445009 | 0.016242237 | 0.052791633 |
| ABR             | -2.955043979 | 0.017656287 | 0.056294016 |
| RGS12           | -2.957172425 | 0.024447406 | 0.072015431 |
| MEF2C           | -2.960183981 | 0.022773389 | 0.068162488 |
| HSDL2           | -2.965397282 | 0.039472201 | 0.102460116 |

|           |              |             |             |
|-----------|--------------|-------------|-------------|
| MAP1S     | -2.966329041 | 0.020148011 | 0.062053824 |
| RPL7AP10  | -2.96641228  | 0.043635232 | 0.110387613 |
| CBFA2T2   | -2.967504628 | 0.017688986 | 0.056329252 |
| ICE2      | -2.968824364 | 0.020840525 | 0.063780143 |
| ENTPD1    | -2.970203007 | 0.008068637 | 0.030994369 |
| USP3      | -2.970647063 | 0.038372647 | 0.100359232 |
| CUL4A     | -2.972956238 | 0.039288123 | 0.102091765 |
| OAZ1      | -2.975918581 | 0.002594263 | 0.012853444 |
| ZNF766    | -2.977495332 | 0.035911865 | 0.09563266  |
| RAC1      | -2.981228584 | 0.047459595 | 0.117715355 |
| LAD1      | -2.982354635 | 0.046403148 | 0.115663861 |
| ATF5      | -2.983113233 | 0.01661504  | 0.053671855 |
| ARVCF     | -2.985520525 | 0.044419501 | 0.111840186 |
| FKBP2     | -2.987863719 | 0.040437004 | 0.104249095 |
| LONRF2    | -2.989980565 | 0.003226798 | 0.015232903 |
| SEMA4D    | -2.993133352 | 0.007119655 | 0.028152989 |
| CCDC148   | -2.995150214 | 0.029618141 | 0.08327479  |
| EEF1A1P11 | -2.997423734 | 0.05048827  | NA          |
| DCAF6     | -2.999980245 | 0.008653667 | 0.032620365 |
| RPS15AP29 | -3.003221184 | 0.014776599 | 0.049217378 |
| IRF7      | -3.00663449  | 0.033998514 | 0.091897726 |
| KATNIP    | -3.008624943 | 0.019967172 | 0.06168521  |
| EXOSC3    | -3.013914471 | 0.029190201 | 0.082358554 |
| ZNF778    | -3.028228119 | 0.010495774 | 0.03788871  |
| UCP2      | -3.028261873 | 0.008031876 | 0.030892222 |
| DIO2      | -3.029023374 | 0.022555912 | 0.06772268  |
| BRPF3     | -3.032924591 | 0.033119625 | 0.090207006 |
| PRR14     | -3.033005385 | 0.049876078 | 0.122107615 |
| IP6K1     | -3.033295485 | 0.02292432  | 0.068512586 |
| CNOT7     | -3.033918808 | 0.009935484 | 0.036398032 |
| ZBTB14    | -3.036994388 | 0.015602566 | 0.051263154 |
| GOLIM4    | -3.038504017 | 0.027944426 | 0.079811075 |
| MPZL2     | -3.041700336 | 0.021932197 | 0.066238423 |
| PCDHGC3   | -3.042018186 | 0.029224904 | 0.082418041 |
| RNF149    | -3.043202353 | 0.032413091 | 0.088822289 |
| SNRNP35   | -3.045856132 | 0.031242691 | 0.086575441 |
| DPM2      | -3.053140852 | 0.034407222 | 0.092733247 |
| SULT1A1   | -3.055147608 | 0.005904489 | 0.024370004 |
| GNPTG     | -3.056861832 | 0.007773389 | 0.030127792 |
| PXDN      | -3.057481257 | 0.017009639 | 0.054596838 |
| MRPL43    | -3.059055582 | 0.029411403 | 0.082847479 |
| ARHGAP6   | -3.061050592 | 0.014685931 | 0.04898278  |
| KDM1B     | -3.062135758 | 0.01924181  | 0.060039279 |
| RNF146    | -3.062263533 | 0.009853548 | 0.036196463 |

|                 |              |             |             |
|-----------------|--------------|-------------|-------------|
| EZR             | -3.063237431 | 0.035550897 | 0.095065438 |
| STARD9          | -3.06333572  | 0.026163184 | 0.075887654 |
| ZNF83           | -3.0637863   | 0.023175334 | 0.069126229 |
| CD74            | -3.066299637 | 0.00503058  | 0.021600264 |
| ACCS            | -3.067149631 | 0.033586459 | 0.091120552 |
| CSPP1           | -3.067742266 | 0.038812566 | 0.101225447 |
| APEX1           | -3.069019329 | 0.018942258 | 0.059321369 |
| SAV1            | -3.069894082 | 0.041831649 | 0.107028734 |
| SRGAP3          | -3.074681456 | 0.031867432 | 0.087764141 |
| YWHAQ           | -3.078105473 | 0.014698055 | 0.048996215 |
| PDXDC1          | -3.081511706 | 0.010675343 | 0.038326521 |
| SELENOF         | -3.08438558  | 0.011894326 | 0.041766443 |
| DCAF1           | -3.087862498 | 0.019496129 | 0.060616785 |
| CFAP410         | -3.089576503 | 0.048700619 | 0.119957732 |
| SLC25A36        | -3.08993326  | 0.039003023 | 0.101568974 |
| RETSAT          | -3.090888364 | 0.021658838 | 0.065687441 |
| BET1            | -3.094636814 | 0.038577411 | 0.100785881 |
| PIN1            | -3.095702746 | 0.033460106 | 0.090909342 |
| RCSD1           | -3.096446171 | 0.038856771 | 0.101297082 |
| SPATA13         | -3.097011845 | 0.043280833 | 0.109780218 |
| CTSO            | -3.098321998 | 0.044679776 | 0.112362164 |
| SEPTIN10        | -3.099546035 | 0.003265033 | 0.015359487 |
| FZR1            | -3.099729422 | 0.011409497 | 0.040403907 |
| ENSG00000260404 | -3.102464594 | 0.006437884 | 0.026035466 |
| DLST            | -3.107005232 | 0.026577162 | 0.07677565  |
| KLF12           | -3.107549782 | 0.033007002 | 0.08994552  |
| FBH1            | -3.108317279 | 0.015409721 | 0.050781176 |
| UNC5B           | -3.114304935 | 0.028462776 | 0.080928691 |
| DENND6B         | -3.116526541 | 0.032362703 | 0.088724384 |
| RTTN            | -3.123047822 | 0.048203889 | 0.119049148 |
| ARHGEF3         | -3.123612468 | 0.037680384 | 0.09895495  |
| STXBP1          | -3.125532205 | 0.046654909 | 0.116195684 |
| POC1B           | -3.126955232 | 0.020840613 | 0.063780143 |
| UNC45A          | -3.128262104 | 0.014245793 | 0.047791319 |
| TBC1D10C        | -3.130308039 | 0.013965228 | 0.04708499  |
| CHID1           | -3.132657166 | 0.042384893 | 0.108028372 |
| CAMK2B          | -3.133078156 | 0.011765007 | 0.041396409 |
| PRMT1P1         | -3.133625824 | 0.030487849 | 0.085150913 |
| ATAD3B          | -3.138614663 | 0.028601161 | 0.08118866  |
| TRIM24          | -3.14450223  | 0.01205164  | 0.04217203  |
| CREB3L2         | -3.147040607 | 0.035123976 | 0.094266209 |
| PDZD2           | -3.147241591 | 0.036250151 | 0.096242997 |
| COL9A3          | -3.151588421 | 0.03932349  | 0.102139811 |
| ATXN7           | -3.15254449  | 0.016385451 | 0.053128717 |

|           |              |             |             |
|-----------|--------------|-------------|-------------|
| TRAPPC6B  | -3.155010735 | 0.04900036  | 0.120450926 |
| ANXA7     | -3.156581402 | 0.016569737 | 0.053568403 |
| SHROOM1   | -3.158887227 | 0.009345963 | 0.034698395 |
| MNAT1     | -3.159123164 | 0.034473813 | 0.092830042 |
| URGCP     | -3.159213307 | 0.005494827 | 0.023148714 |
| RAB11B    | -3.159681628 | 0.035404155 | 0.09480794  |
| TCF7L2    | -3.15979564  | 0.034106264 | 0.092151948 |
| RDH11     | -3.160105932 | 0.036240862 | 0.096239446 |
| RIC8A     | -3.160611528 | 0.033424386 | 0.090853081 |
| ZNF606    | -3.162681766 | 0.048373079 | 0.11934524  |
| ANKRD11   | -3.163138718 | 0.012186558 | 0.042496716 |
| PRR3      | -3.165217857 | 0.021068998 | 0.064296544 |
| MICOS13   | -3.168099374 | 0.04578797  | 0.114626181 |
| ATP6V1A   | -3.168499629 | 0.00338749  | 0.015830955 |
| EBF2      | -3.16952246  | 0.041426516 | 0.106122021 |
| SNUPN     | -3.169727366 | 0.033854524 | 0.091610812 |
| KDSR      | -3.173318963 | 0.011167397 | 0.039725707 |
| ACOT8     | -3.174337221 | 0.019898306 | 0.061580151 |
| DDAH2     | -3.175670836 | 0.049530194 | 0.121432746 |
| SUPV3L1   | -3.17665161  | 0.045035122 | 0.11306889  |
| FLOT1     | -3.177345849 | 0.029075743 | 0.082112178 |
| AMPD3     | -3.178404608 | 0.026426849 | 0.076450904 |
| MAT2B     | -3.179894291 | 0.008530319 | 0.03229621  |
| SMIM5     | -3.181462495 | 0.036629741 | 0.096896775 |
| SGSH      | -3.184075229 | 0.00996234  | 0.03646331  |
| SEMA3F    | -3.185940444 | 0.017659317 | 0.056294016 |
| PHLPP2    | -3.185997879 | 0.010643555 | 0.038239711 |
| LRRC37A2  | -3.189216829 | 0.039797219 | 0.103127378 |
| UBE2J2    | -3.191412797 | 0.013528013 | 0.046008169 |
| STRN      | -3.196876775 | 0.040702371 | 0.104700417 |
| NUP133    | -3.197146988 | 0.025466516 | 0.074206638 |
| TTYH3     | -3.198835076 | 0.031556768 | 0.087205095 |
| NECTIN2   | -3.198924696 | 0.014708832 | 0.04901864  |
| CTBS      | -3.199924297 | 0.032926959 | 0.089864241 |
| SLC33A1   | -3.200228604 | 0.005156944 | 0.022048625 |
| SLC35E1P1 | -3.201698583 | 0.044354232 | 0.111753461 |
| TMUB1     | -3.206351408 | 0.035447514 | 0.094903056 |
| TRABD     | -3.207872814 | 0.048395656 | 0.119376609 |
| ARAP2     | -3.208420839 | 0.005512869 | 0.023193525 |
| RNF207    | -3.208560046 | 0.01024659  | 0.037199977 |
| MYEF2     | -3.208963981 | 0.001027086 | 0.006297798 |
| SEC11A    | -3.209192061 | 9.14E-05    | 0.000999243 |
| ITGB8     | -3.210296891 | 0.001701586 | 0.009249341 |
| KPNA1     | -3.210661113 | 0.020078973 | 0.061904199 |

|                 |              |             |             |
|-----------------|--------------|-------------|-------------|
| FAM168B         | -3.213930264 | 0.034800356 | 0.093522095 |
| EPPK1           | -3.220977448 | 0.044373915 | 0.111779784 |
| NT5C3B          | -3.223704265 | 0.019288318 | 0.060125111 |
| CCDC125         | -3.224261587 | 0.002363298 | 0.011973779 |
| DOCK4           | -3.224542799 | 0.016087773 | 0.052402153 |
| SEL1L           | -3.230266994 | 0.028408078 | 0.080830129 |
| ARHGAP1         | -3.230368625 | 0.012431302 | 0.043176035 |
| MAP3K4          | -3.237331997 | 0.009380247 | 0.034806411 |
| UBA5            | -3.237464876 | 0.012086044 | 0.042234888 |
| PSEN2           | -3.238859677 | 0.049086561 | 0.120638321 |
| BBS9            | -3.239736045 | 0.00170435  | 0.009249341 |
| DDX52           | -3.240533865 | 0.036044426 | 0.095801874 |
| ZNF540          | -3.243861063 | 0.012896104 | 0.044471351 |
| GSTM3           | -3.252324189 | 0.012365498 | 0.043003831 |
| AURKAIP1        | -3.254294747 | 0.012141814 | 0.042359892 |
| TRAPPC1         | -3.254363716 | 0.026356888 | 0.076303222 |
| RIPOR1          | -3.256897867 | 0.000582321 | 0.004062489 |
| FBLN1           | -3.257234523 | 0.013785504 | 0.04662189  |
| ENSG00000237719 | -3.257612123 | 0.030648267 | 0.085417136 |
| PFKM            | -3.259369726 | 3.44E-05    | 0.000468057 |
| LRP3            | -3.262549123 | 0.019907727 | 0.061580151 |
| POLR2J3         | -3.263282238 | 0.001592117 | 0.008802352 |
| ZNF419          | -3.265432678 | 0.047402946 | 0.11761934  |
| NR4A2           | -3.266331947 | 0.022791439 | 0.068199649 |
| KDELR1          | -3.267607733 | 0.012020319 | 0.042086763 |
| ARHGAP12        | -3.268318742 | 0.030868731 | 0.085873391 |
| RINT1           | -3.275023559 | 0.027602164 | 0.079188574 |
| TMUB2           | -3.275386109 | 0.037281511 | 0.098140998 |
| SEC13           | -3.276954014 | 0.001327308 | 0.00767227  |
| LSG1            | -3.278061039 | 0.041922825 | 0.107211889 |
| MTMR14          | -3.282165384 | 0.00610166  | 0.024976156 |
| SEC11C          | -3.286015869 | 0.025531533 | 0.074358439 |
| ENSG00000259924 | -3.286646601 | 0.021967887 | 0.066292204 |
| MAPK6P3         | -3.287917661 | 0.014428574 | 0.048257382 |
| EEF1A1P9        | -3.28846006  | 0.001345687 | 0.007763677 |
| SLC35A3         | -3.290170735 | 0.001365703 | 0.007852952 |
| RGPD6           | -3.293420618 | 0.02673216  | 0.07713433  |
| PDE4D           | -3.294760486 | 0.028854406 | 0.081677985 |
| USP40           | -3.295881379 | 0.003229937 | 0.015235836 |
| C1orf52         | -3.296043499 | 0.049578853 | 0.121502822 |
| TRMT10B         | -3.300964772 | 0.013789662 | 0.046622923 |
| RPS3AP6         | -3.302063163 | 0.01897381  | 0.059358749 |
| CCDC30          | -3.303629289 | 0.022566704 | 0.067728088 |
| ENSG00000249967 | -3.30381729  | 0.016965561 | 0.054498714 |

|             |              |             |             |
|-------------|--------------|-------------|-------------|
| REC8        | -3.303964163 | 0.031488808 | 0.08707803  |
| FAM177A1    | -3.308511338 | 0.007105574 | 0.02811568  |
| BAHD1       | -3.313346909 | 0.011280546 | 0.040064475 |
| PCBP4       | -3.313572305 | 0.008361975 | 0.031868182 |
| ZCCHC7      | -3.313887544 | 0.042373175 | 0.108021254 |
| NPIP13      | -3.314804775 | 0.022559306 | 0.06772268  |
| ACTR8       | -3.319556326 | 0.03130252  | 0.086681697 |
| SPDYE16     | -3.319710302 | 0.016282559 | 0.052894282 |
| NDUFS7      | -3.324898259 | 0.009940755 | 0.036406323 |
| IQCJ-SCHIP1 | -3.326633584 | 0.01593582  | 0.052098637 |
| MDM4        | -3.326701778 | 0.000173085 | 0.00161155  |
| COQ4        | -3.327016173 | 0.00322953  | 0.015235836 |
| CCDC78      | -3.329559406 | 0.038439366 | 0.100512008 |
| MMADHCP2    | -3.330545834 | 0.013876687 | 0.046833125 |
| KLHL22      | -3.330667675 | 0.014224841 | 0.04775801  |
| CBX6        | -3.332278252 | 0.00054094  | 0.003826734 |
| TAS2R20     | -3.336625279 | 0.040457984 | 0.10428097  |
| GATAD2B     | -3.336673706 | 0.01208705  | 0.042234888 |
| ADPGK       | -3.338566327 | 0.032992592 | 0.089941966 |
| ZBTB18      | -3.339979831 | 0.007928253 | 0.030590875 |
| MTHFD1P1    | -3.34280174  | 0.044425612 | 0.111840186 |
| SLC12A7     | -3.343025659 | 0.001697592 | 0.0092349   |
| CCNB1IP1    | -3.343981788 | 0.000697254 | 0.004673703 |
| VEZTP1      | -3.344084218 | 0.042251657 | 0.107802289 |
| CEP135      | -3.344452897 | 0.010080155 | 0.036805491 |
| HMGB1       | -3.345706044 | 0.002614539 | 0.012919084 |
| TBCEL       | -3.347469123 | 0.016317688 | 0.052979961 |
| PHKA1       | -3.347518038 | 0.026774894 | 0.077217139 |
| ZNF470      | -3.350235664 | 0.006697464 | 0.026860868 |
| TBC1D22A    | -3.352423281 | 0.004824501 | 0.020915385 |
| CDH5        | -3.35353562  | 0.042224902 | 0.10775674  |
| WDR13       | -3.35394143  | 0.005018811 | 0.021572927 |
| FAM214B     | -3.354340758 | 0.021738097 | 0.065795931 |
| NFE2L3      | -3.357664641 | 0.016960792 | 0.054498714 |
| RFX5        | -3.358445841 | 0.01165442  | 0.041102885 |
| TBC1D22B    | -3.358990456 | 0.0355975   | 0.095136263 |
| LANCL1      | -3.360282698 | 0.023481978 | 0.069714462 |
| NPIP11      | -3.360370127 | 0.001255004 | 0.00737406  |
| VTI1A       | -3.363084921 | 0.013313287 | 0.045482366 |
| ZBTB25      | -3.365384627 | 0.044142448 | 0.11135894  |
| KMT5A       | -3.366027725 | 0.041044896 | 0.1054087   |
| MBNL1       | -3.366185234 | 0.009530161 | 0.035233068 |
| TYW1        | -3.366296584 | 0.023608829 | 0.069984025 |
| HDGFL2      | -3.367822863 | 0.009251485 | 0.034426698 |



|          |              |             |             |
|----------|--------------|-------------|-------------|
| UFC1     | -3.368495973 | 0.04687186  | 0.116592065 |
| PIK3C3   | -3.370183239 | 0.028610433 | 0.081195939 |
| ACBD5    | -3.370381433 | 0.00727261  | 0.028617579 |
| RRM1     | -3.374115561 | 0.022468184 | 0.067532877 |
| SPSB1    | -3.37671015  | 0.035815226 | 0.095507269 |
| NPLOC4   | -3.376911984 | 0.005055868 | 0.021700788 |
| RRP8     | -3.377246647 | 0.024735179 | 0.072580512 |
| MRS2     | -3.377703127 | 0.00130881  | 0.007597643 |
| TMEM231  | -3.380603716 | 0.01944727  | 0.060511504 |
| MRPL4    | -3.381313155 | 0.023801058 | 0.070378735 |
| GSTM2    | -3.381690089 | 0.018130612 | 0.057463883 |
| HBA2     | -3.384206639 | 0.023350815 | 0.069495517 |
| RREB1    | -3.384642929 | 0.004759598 | 0.020685881 |
| MUC5B    | -3.386338624 | 0.01619728  | 0.052687954 |
| TRIM32   | -3.388941129 | 0.031569292 | 0.087205095 |
| SEC24D   | -3.393032976 | 0.008970384 | 0.033625746 |
| ADAMTS10 | -3.393550426 | 0.030368271 | 0.084910501 |
| GMPS     | -3.397337732 | 0.003573243 | 0.016482673 |
| CNPY4    | -3.397601081 | 0.045501447 | 0.114026815 |
| SLC43A3  | -3.398185288 | 0.040047762 | 0.103510168 |
| TMEM267  | -3.398533077 | 0.044952256 | 0.112931114 |
| TMPO     | -3.399758237 | 0.01613325  | 0.052512516 |
| RER1     | -3.401203389 | 0.005672763 | 0.023676939 |
| RBSN     | -3.402338502 | 0.005030663 | 0.021600264 |
| WDPCP    | -3.404367748 | 7.71E-06    | 0.000134969 |
| PARP6    | -3.404399864 | 0.00155996  | 0.008689259 |
| MGAT1    | -3.407502925 | 0.001363032 | 0.00784505  |
| MBTD1    | -3.40757141  | 0.002539587 | 0.01262907  |
| TRIM5    | -3.408141586 | 0.009418417 | 0.034915933 |
| SH2B3    | -3.408731231 | 0.005386934 | 0.022814363 |
| PPAN     | -3.408967159 | 0.010473721 | 0.037831668 |
| ETF1P2   | -3.409993476 | 0.022553979 | 0.06772268  |
| CAMTA1   | -3.413508671 | 0.028023687 | 0.079999695 |
| CARS1    | -3.415533985 | 0.001506103 | 0.008459334 |
| CD58     | -3.416969464 | 0.033792566 | 0.091484058 |
| TRIQQ    | -3.421218159 | 0.023032599 | 0.068768273 |
| CYP4V2   | -3.422109138 | 0.00075749  | 0.004974855 |
| RNGTT    | -3.422527309 | 0.026131146 | 0.075812893 |
| CDCP1    | -3.42325046  | 0.006141831 | 0.025072758 |
| FBXO3    | -3.424620471 | 0.002417001 | 0.012154292 |
| PABIR2   | -3.427004656 | 0.010233831 | 0.037164803 |
| AGK      | -3.427296758 | 0.013745835 | 0.046539746 |
| PCGF5    | -3.431664954 | 0.027075502 | 0.077954777 |
| SLC37A2  | -3.432794739 | 0.004688131 | 0.020448699 |

|                 |              |             |             |
|-----------------|--------------|-------------|-------------|
| GSTCD           | -3.433502427 | 0.005530375 | 0.023218751 |
| MEAK7           | -3.435585692 | 0.03551404  | 0.09503912  |
| SPEG            | -3.437902424 | 0.005585786 | 0.023390255 |
| NUP205          | -3.440623855 | 0.032487205 | 0.088924725 |
| PTENP1          | -3.442126149 | 0.020011265 | 0.061783391 |
| MCUR1           | -3.442428881 | 0.002244397 | 0.011486756 |
| HSPB1           | -3.442480498 | 0.011140449 | 0.039659999 |
| HSP90AB3P       | -3.443244306 | 0.044160937 | 0.111359162 |
| ENSG00000228981 | -3.44561062  | 0.047244808 | 0.117391932 |
| CXADR           | -3.445916926 | 0.013451978 | 0.04586556  |
| DCTN3           | -3.448181298 | 0.010627498 | 0.038238774 |
| SCAMP1          | -3.448864441 | 0.011522143 | 0.040755119 |
| TAS2R3          | -3.450391291 | 0.04183544  | 0.107028734 |
| TRIR            | -3.451353849 | 0.019467831 | 0.060559916 |
| KATNA1          | -3.451720729 | 0.037587366 | 0.098753523 |
| PELP1           | -3.451842405 | 0.00761232  | 0.029621295 |
| COPB1           | -3.454120652 | 0.006117636 | 0.025009078 |
| RYK             | -3.455746273 | 0.005604272 | 0.023438435 |
| NPIPP1          | -3.456687638 | 0.013972589 | 0.04709669  |
| ITPK1           | -3.459738035 | 0.00671477  | 0.026921358 |
| LONRF1          | -3.45996753  | 0.001501485 | 0.008437316 |
| SLC39A11        | -3.460308525 | 0.038186247 | 0.100001369 |
| UBOX5           | -3.462545119 | 0.031820503 | 0.087693358 |
| SMURF2          | -3.463491022 | 0.024046034 | 0.071023229 |
| GSAP            | -3.463558381 | 0.005696783 | 0.023736624 |
| MTX2            | -3.464845823 | 0.011385876 | 0.040391163 |
| GLIS2           | -3.465785653 | 0.007570792 | 0.029513543 |
| DPH7            | -3.465836666 | 0.003412556 | 0.015929647 |
| CREB3L4         | -3.473248213 | 0.046088509 | 0.115140415 |
| ABITRAM         | -3.473524741 | 0.027762823 | 0.079517559 |
| MTHFD1          | -3.47367155  | 0.010107158 | 0.036848506 |
| GRHL1           | -3.475052977 | 0.009676723 | 0.035676836 |
| NUDCD3          | -3.476662656 | 0.014839398 | 0.049372204 |
| DHX57           | -3.4789319   | 0.015446804 | 0.050834182 |
| ZNF687          | -3.479162068 | 0.000829287 | 0.005322208 |
| ZNF252P         | -3.480666291 | 0.001694751 | 0.009223588 |
| LRP5L           | -3.482277152 | 0.008503471 | 0.032255096 |
| METAP2          | -3.482984975 | 0.014401703 | 0.04818082  |
| DCLRE1C         | -3.483747566 | 0.037158255 | 0.097958546 |
| GOSR1           | -3.48399152  | 0.000326684 | 0.002625618 |
| SLC25A45        | -3.484019192 | 0.011977401 | 0.04197292  |
| AP3B1           | -3.484104647 | 0.004370063 | 0.019382646 |
| NENF            | -3.485100572 | 0.043437542 | 0.110085428 |
| ENSG00000234268 | -3.485509914 | 0.023341761 | 0.069485656 |

|          |              |             |             |
|----------|--------------|-------------|-------------|
| KREMEN1  | -3.485947664 | 0.045988351 | 0.114937642 |
| ZNF677   | -3.486324505 | 0.019418424 | 0.06045283  |
| SSPOP    | -3.487740571 | 0.023985572 | 0.070861938 |
| SLC16A7  | -3.488503928 | 0.032272336 | 0.088584047 |
| PHF21A   | -3.490446044 | 0.022424572 | 0.06747169  |
| NFX1     | -3.495566111 | 0.004638529 | 0.020242492 |
| TRRAP    | -3.496227921 | 0.013563946 | 0.046065658 |
| LSM14B   | -3.496534999 | 0.031526517 | 0.087162395 |
| MMAA     | -3.499014716 | 0.030685271 | 0.085500581 |
| SUGP1    | -3.501043138 | 0.015444606 | 0.050834182 |
| PINK1    | -3.502139518 | 0.005809889 | 0.02405024  |
| DENND10  | -3.502965279 | 0.021331118 | 0.064858812 |
| CENPV    | -3.504977994 | 0.033196535 | 0.090355489 |
| MGME1    | -3.506452124 | 0.036293086 | 0.096272521 |
| TMEM126A | -3.507220327 | 0.014301963 | 0.047939896 |
| FAM184A  | -3.50723561  | 0.015128322 | 0.05014053  |
| SLC7A11  | -3.507554214 | 0.038254251 | 0.100157788 |
| TBC1D19  | -3.507829866 | 0.029974331 | 0.08411994  |
| ZCCHC2   | -3.508090735 | 0.0030066   | 0.014446959 |
| ATR      | -3.508659222 | 0.038524274 | 0.100707736 |
| ZNF93    | -3.509459832 | 0.010937338 | 0.039109464 |
| TNFSF12  | -3.509830138 | 0.043495848 | 0.110182139 |
| MYL12B   | -3.511505514 | 0.015686462 | 0.051510835 |
| IDH3A    | -3.511718041 | 0.017118373 | 0.054888381 |
| RHOF     | -3.512996021 | 0.04751464  | 0.11782774  |
| AXIN1    | -3.513164878 | 0.023506824 | 0.069771113 |
| MPPED2   | -3.513764028 | 0.042954796 | 0.109136198 |
| TGFB111  | -3.51489156  | 0.005533703 | 0.023224668 |
| ANKRD37  | -3.515107659 | 0.046484283 | 0.115794559 |
| COG8     | -3.516168308 | 0.00528394  | 0.022488328 |
| CRIP1    | -3.516529053 | 0.037673098 | 0.09895495  |
| THEMIS2  | -3.521568351 | 0.014160839 | 0.047625116 |
| OTUD4    | -3.524076642 | 0.013422362 | 0.045803291 |
| RBM45    | -3.525174914 | 0.050409046 | 0.123213065 |
| AKR1B1   | -3.528864995 | 0.000364656 | 0.002816715 |
| YY1      | -3.529423776 | 0.006524256 | 0.026288147 |
| WWC1     | -3.530413868 | 0.000407034 | 0.003063893 |
| ATXN10   | -3.531714785 | 0.001615911 | 0.008882372 |
| HSCB     | -3.533542211 | 0.032643112 | 0.089230404 |
| BUB3     | -3.533767865 | 0.030076682 | 0.08430944  |
| COMMD9   | -3.535648463 | 0.031827241 | 0.087693358 |
| CLCF1    | -3.535730038 | 0.028694641 | 0.081415831 |
| TMEM132A | -3.539039664 | 0.007965417 | 0.030695131 |
| PREX2    | -3.539968485 | 0.02242553  | 0.06747169  |

|          |              |             |             |
|----------|--------------|-------------|-------------|
| PFKP     | -3.542049312 | 0.01854942  | 0.058408474 |
| TMEM140  | -3.542940988 | 0.030793408 | 0.085703245 |
| ANKRD42  | -3.544333204 | 0.007605137 | 0.02960842  |
| TOP1MT   | -3.546381483 | 0.035523716 | 0.095044    |
| C8orf44  | -3.55286974  | 0.033367751 | 0.09071951  |
| ERCC6L2  | -3.553165952 | 0.003749176 | 0.017082356 |
| PDGFC    | -3.554539195 | 0.032361638 | 0.088724384 |
| BCR      | -3.55537219  | 0.000448798 | 0.003306297 |
| RNPS1    | -3.556146192 | 0.010817371 | 0.038714802 |
| ZNF415   | -3.557580896 | 0.001650214 | 0.009025843 |
| TNFAIP1  | -3.557613268 | 0.030276148 | 0.084770413 |
| OPTN     | -3.559016314 | 0.005605938 | 0.023438435 |
| COA5     | -3.559546107 | 0.028533186 | 0.081058155 |
| MAGED2   | -3.559871687 | 0.004009447 | 0.018020924 |
| ARHGEF9  | -3.560660114 | 0.02914327  | 0.082245312 |
| BAD      | -3.563871734 | 0.031289943 | 0.086666698 |
| USP5     | -3.564985164 | 0.000409654 | 0.003079781 |
| DDX23    | -3.565249036 | 0.001456111 | 0.008243578 |
| DHX40    | -3.565733527 | 0.00843617  | 0.032050033 |
| ZFTA     | -3.565825826 | 0.026629692 | 0.076890694 |
| INPP5J   | -3.566311023 | 0.001607871 | 0.008862329 |
| OSTCP8   | -3.567096393 | 0.036819214 | 0.097284385 |
| TCN2     | -3.568248952 | 0.011849075 | 0.04163258  |
| DEK      | -3.568285637 | 0.001088302 | 0.006583109 |
| MIGA1    | -3.569261554 | 0.002895136 | 0.014000292 |
| ZNF692   | -3.576925892 | 0.013582132 | 0.046110334 |
| ETV5     | -3.577294375 | 0.017398119 | 0.055578474 |
| MRPL52   | -3.579878101 | 0.015020663 | 0.049838296 |
| DPRXP4   | -3.579940353 | 0.022670846 | 0.067956394 |
| ERMARD   | -3.58220136  | 0.028843443 | 0.081677985 |
| IFT88    | -3.58366033  | 0.024707299 | 0.072570554 |
| IMMP1L   | -3.58420286  | 0.040491414 | 0.104328158 |
| SPNS1    | -3.586015736 | 0.002930729 | 0.014149799 |
| ISLR     | -3.58722273  | 0.011468262 | 0.040588259 |
| PBX4     | -3.587361996 | 0.035321181 | 0.094634283 |
| LCOR     | -3.589810313 | 0.002386543 | 0.012066296 |
| EIF3EP1  | -3.591187133 | 0.030253379 | 0.084726262 |
| GALNT11  | -3.594746094 | 0.00769609  | 0.029866313 |
| TP53INP2 | -3.594798256 | 0.028800633 | 0.081601794 |
| HLA-A    | -3.595513553 | 0.01778642  | 0.056550256 |
| CORO1A   | -3.599729061 | 0.024683309 | 0.072551427 |
| MTRFR    | -3.601647337 | 0.00220671  | 0.011346651 |
| RNF43    | -3.601716624 | 0.035633713 | 0.095168465 |
| ACTG1    | -3.603497084 | 0.009897789 | 0.036336926 |

|          |              |             |             |
|----------|--------------|-------------|-------------|
| DLC1     | -3.604559744 | 0.004088703 | 0.018309163 |
| RMDN1    | -3.605871574 | 0.001910191 | 0.010145218 |
| EVI2A    | -3.606543674 | 0.02311571  | 0.068982387 |
| MVP      | -3.606671806 | 0.013666062 | 0.046308516 |
| API5     | -3.609117572 | 0.008358761 | 0.031865968 |
| DAPK1    | -3.610493535 | 0.035193891 | 0.09439106  |
| MRPL10   | -3.611217344 | 0.0336847   | 0.091294136 |
| TM2D1    | -3.611251395 | 0.000594143 | 0.004125936 |
| GAS6     | -3.612592441 | 0.003896486 | 0.017631054 |
| NPIP9    | -3.612740426 | 0.005431851 | 0.022956398 |
| NOXA1    | -3.61437446  | 0.00571957  | 0.023764564 |
| NAA10    | -3.618462071 | 0.018963361 | 0.059341398 |
| SPSB3    | -3.623829604 | 0.01853314  | 0.058373515 |
| TEX261   | -3.624439874 | 0.016630642 | 0.053707922 |
| EIF4BP6  | -3.624448984 | 0.018204404 | 0.057606824 |
| PRRT2    | -3.624715213 | 0.028392543 | 0.080830129 |
| ACAD8    | -3.625109153 | 0.002407967 | 0.012129342 |
| C1orf112 | -3.626255702 | 0.001791502 | 0.009606418 |
| NCAPD2   | -3.627456774 | 0.005083743 | 0.021774107 |
| CAMKK1   | -3.629966734 | 0.001273591 | 0.007445466 |
| PAPOLA   | -3.630900094 | 0.003376972 | 0.015787899 |
| TBRG1    | -3.631393864 | 0.000688794 | 0.004639486 |
| MRPL35P3 | -3.634403898 | 0.025206378 | 0.07358852  |
| RBFOX2   | -3.636353083 | 0.019350096 | 0.060302153 |
| LYPD5    | -3.638573218 | 0.03237066  | 0.088726103 |
| ALDH2    | -3.638945046 | 0.00934088  | 0.03469224  |
| SPATS2L  | -3.638993056 | 0.00608525  | 0.024925842 |
| C1orf159 | -3.64034023  | 0.047848304 | 0.118448095 |
| AZI2     | -3.645315879 | 0.008331618 | 0.031772496 |
| FLYWCH2  | -3.64532712  | 0.015938636 | 0.052098637 |
| STEAP2   | -3.646770471 | 0.001790521 | 0.009606418 |
| EIF2B5   | -3.646879227 | 0.007168424 | 0.028326794 |
| TPD52L1  | -3.650409068 | 0.00892485  | 0.033499338 |
| AP1M1    | -3.650477317 | 0.007022762 | 0.027870004 |
| CDC73    | -3.651973262 | 0.011168753 | 0.039725707 |
| CSPG4P13 | -3.652228647 | 0.025192295 | 0.0735829   |
| XRCC6    | -3.652302851 | 0.001001927 | 0.006174811 |
| RPA2     | -3.652444443 | 0.018409336 | 0.058118571 |
| B4GALT6  | -3.655636417 | 0.021711764 | 0.065765563 |
| SCRN3    | -3.656221587 | 0.002460466 | 0.012342097 |
| CGRRF1   | -3.657760436 | 0.049754546 | 0.121867786 |
| IAH1     | -3.658241784 | 0.015629985 | 0.051339304 |
| DGKQ     | -3.65853167  | 0.00818002  | 0.031322669 |
| CPT2     | -3.659570039 | 0.010609631 | 0.038185839 |

|                 |              |             |             |
|-----------------|--------------|-------------|-------------|
| FAM102B         | -3.661430271 | 0.050049333 | 0.122507002 |
| DDX18P5         | -3.661962309 | 0.031313886 | 0.086693339 |
| SIL1            | -3.662459865 | 0.016531711 | 0.053459745 |
| ECT2            | -3.663207317 | 0.001681988 | 0.009162369 |
| TLR1            | -3.66408051  | 0.04447924  | 0.111928633 |
| DTYMK           | -3.664119746 | 0.033475376 | 0.090921301 |
| ZNF468          | -3.664895602 | 0.007427273 | 0.029056145 |
| EGFL7           | -3.665551895 | 0.001516535 | 0.008486426 |
| PBX2            | -3.66580309  | 0.003563394 | 0.01644978  |
| PACRGL          | -3.666283116 | 0.015967105 | 0.052135377 |
| ZNF45           | -3.667221386 | 0.018135495 | 0.057463883 |
| PHF23           | -3.667853327 | 0.001120367 | 0.006736644 |
| CHRAC1          | -3.668089903 | 0.031240283 | 0.086575441 |
| SULT1C2         | -3.668304609 | 0.005221088 | 0.02227566  |
| MSS51           | -3.668475511 | 0.031862163 | 0.087764141 |
| TFIP11          | -3.669224728 | 0.046208157 | 0.115320315 |
| SMARCD1         | -3.669719769 | 0.003970127 | 0.017910702 |
| ABCC8           | -3.670014586 | 0.045664644 | 0.114353119 |
| CEP192          | -3.670759525 | 0.003762394 | 0.017126746 |
| PAFAH1B2        | -3.671386071 | 0.016882492 | 0.054390653 |
| ZNF266          | -3.674456205 | 0.002038327 | 0.010625287 |
| SOD2            | -3.674663213 | 0.004458608 | 0.019674441 |
| HNRNPRP1        | -3.675891974 | 0.005082595 | 0.021774107 |
| COL7A1          | -3.676275489 | 0.000174558 | 0.001621527 |
| ENSG00000272101 | -3.6772171   | 0.035640999 | 0.095168465 |
| ENSG00000240265 | -3.677622417 | 0.023472371 | 0.069714462 |
| STAG3L4         | -3.678031805 | 0.040707218 | 0.104700417 |
| RTCA            | -3.679006874 | 0.013052172 | 0.044919958 |
| NF2             | -3.680964632 | 0.005503054 | 0.023160282 |
| R3HDM4          | -3.681446127 | 0.027942082 | 0.079811075 |
| PDGFB           | -3.681664709 | 0.024257475 | 0.071543002 |
| ZNF19           | -3.682758258 | 0.019955878 | 0.061681805 |
| HEXB            | -3.682817387 | 0.005502863 | 0.023160282 |
| PSMD9           | -3.683665598 | 0.008830912 | 0.033185147 |
| RAN             | -3.686785056 | 0.001003521 | 0.006180076 |
| RDH5            | -3.68707678  | 0.028112046 | 0.080192555 |
| ZNF791          | -3.6905422   | 0.003441793 | 0.016023204 |
| AEBP2           | -3.690951082 | 0.009123291 | 0.034051285 |
| GPR87           | -3.691107044 | 0.040432073 | 0.104249095 |
| ETHE1           | -3.692290914 | 0.040663371 | 0.104654359 |
| FTH1P11         | -3.695584468 | 0.012994556 | 0.044747112 |
| DUSP5           | -3.69568935  | 0.020197179 | 0.062173614 |
| RELA            | -3.69616377  | 0.000494754 | 0.003560344 |
| ZRANB2          | -3.698029106 | 0.001170336 | 0.006989652 |

|                 |              |             |             |
|-----------------|--------------|-------------|-------------|
| DYM             | -3.698338068 | 0.004905745 | 0.021237172 |
| GPALPP1         | -3.699956994 | 0.031542538 | 0.087186773 |
| METTL18         | -3.702522058 | 0.048716988 | 0.119973635 |
| SLC27A5         | -3.703016554 | 0.00446299  | 0.0196866   |
| PAXX            | -3.704841276 | 0.007631318 | 0.02966816  |
| UEVLD           | -3.705216792 | 0.00928863  | 0.034519365 |
| ZNF483          | -3.705455188 | 0.006244714 | 0.025424155 |
| LZIC            | -3.705629477 | 0.019245902 | 0.060039279 |
| GTF2B           | -3.70571327  | 0.04898663  | 0.120441635 |
| CLDN1           | -3.706740203 | 0.024276184 | 0.071563305 |
| FAAH            | -3.707084514 | 0.023601438 | 0.069984025 |
| PCDHA6          | -3.707302518 | 0.029364167 | 0.082733676 |
| METTL26         | -3.708770467 | 0.000786181 | 0.005137541 |
| SLC25A27        | -3.70945824  | 0.028194473 | 0.080373504 |
| GNB5            | -3.710596396 | 0.000311955 | 0.002538288 |
| DCP1A           | -3.712751146 | 0.006604496 | 0.026567238 |
| SENP2           | -3.713177948 | 0.007037852 | 0.027904847 |
| DGUOK           | -3.714381052 | 0.016712538 | 0.053950786 |
| CCDC142         | -3.714890652 | 0.03628779  | 0.096272521 |
| MBTPS2          | -3.716150967 | 0.049380005 | 0.121187262 |
| IL1R1           | -3.717244582 | 0.001232129 | 0.007271421 |
| CSNK1G1         | -3.717689165 | 0.011551993 | 0.040801085 |
| TIE1            | -3.717699838 | 0.009915379 | 0.036357389 |
| PIK3R3          | -3.718126525 | 0.006407887 | 0.025931481 |
| ZEB2            | -3.719056938 | 0.006813004 | 0.027216038 |
| ABLIM3          | -3.721078882 | 0.045301701 | 0.113643895 |
| CRMP1           | -3.7222499   | 0.024634092 | 0.07245955  |
| UBALD1          | -3.722535044 | 0.032975338 | 0.089915183 |
| SARNP           | -3.722684556 | 0.030607725 | 0.085363111 |
| SEMA4C          | -3.722831493 | 0.000248124 | 0.00213454  |
| PTGR2           | -3.723776397 | 0.006440059 | 0.026035562 |
| RPS7P1          | -3.724547455 | 0.05043753  | 0.123257797 |
| ACKR4P1         | -3.725005828 | 0.04049353  | 0.104328158 |
| ENSG00000232027 | -3.725546524 | 0.033129152 | 0.090212657 |
| XPO5            | -3.725738407 | 0.000714203 | 0.004757682 |
| EIF2AK3         | -3.727646358 | 0.013626082 | 0.046185969 |
| ZNF525          | -3.728749606 | 0.032328646 | 0.088704959 |
| FADS1           | -3.732169822 | 0.017499543 | 0.055887723 |
| FANCM           | -3.732897043 | 0.021168185 | 0.064506474 |
| ANO1            | -3.733198528 | 0.001588179 | 0.008793645 |
| ENSG00000236583 | -3.734779875 | 0.032906447 | 0.089838693 |
| MRPL30          | -3.735771745 | 0.01058432  | 0.038117408 |
| RAP1B           | -3.73629812  | 0.004546869 | 0.019918677 |
| PAXIP1          | -3.738457694 | 0.003731794 | 0.017042129 |

|                 |              |             |             |
|-----------------|--------------|-------------|-------------|
| NICN1           | -3.741318136 | 0.02764682  | 0.079260328 |
| ENSG00000251288 | -3.742269157 | 0.02361903  | 0.069984025 |
| SUMO2           | -3.742411635 | 0.008518746 | 0.032272582 |
| RIT1            | -3.742607305 | 0.036616268 | 0.096896221 |
| RALBP1          | -3.74565574  | 0.023724221 | 0.07019261  |
| ZWILCH          | -3.746095978 | 0.028854516 | 0.081677985 |
| B4GALT4         | -3.747343502 | 0.035995389 | 0.095734606 |
| LCMT2           | -3.750783478 | 0.043968467 | 0.110989431 |
| IL1RL2          | -3.751176728 | 0.015396676 | 0.050752006 |
| ARL17B          | -3.754560873 | 0.0106354   | 0.038238807 |
| NR4A3           | -3.756795112 | 0.018856678 | 0.05909923  |
| LYPLA2          | -3.757444787 | 0.010340232 | 0.037438876 |
| SHMT1           | -3.75930953  | 0.001432012 | 0.008160581 |
| SNAPC4          | -3.76092954  | 0.0045745   | 0.020032469 |
| TTC9C           | -3.762097044 | 0.002090503 | 0.010845887 |
| AMT             | -3.762398012 | 0.001681469 | 0.009162369 |
| IFIT3           | -3.763230313 | 0.035310408 | 0.094634283 |
| LRRFIP1P1       | -3.765883355 | 0.023219417 | 0.069189517 |
| DUT             | -3.765895386 | 0.004621328 | 0.020186414 |
| USP47           | -3.766117697 | 0.01017996  | 0.037018869 |
| WNT3            | -3.766122299 | 0.033479531 | 0.090921301 |
| KIAA0895L       | -3.766578009 | 0.007047136 | 0.02792096  |
| METTL17         | -3.767232995 | 0.010814186 | 0.038714802 |
| RBMXL1          | -3.76727986  | 0.004526906 | 0.01986573  |
| PAPOLG          | -3.768790381 | 0.011952382 | 0.04190951  |
| TPM3P9          | -3.768894668 | 0.033944473 | 0.091813163 |
| PALM            | -3.769573146 | 0.015314277 | 0.050563013 |
| GATM            | -3.771460718 | 0.033316254 | 0.09059985  |
| PDIK1L          | -3.771878693 | 0.035323669 | 0.094634283 |
| PBX2            | -3.773182929 | 0.025683655 | 0.074654857 |
| SNPH            | -3.773755538 | 0.017601091 | 0.056167572 |
| MYO1E           | -3.773967936 | 0.003297999 | 0.015478474 |
| CDK9            | -3.77574088  | 0.010726433 | 0.038452781 |
| BNC2            | -3.776199498 | 0.037761997 | 0.099083288 |
| ZNF512          | -3.77749     | 0.003353263 | 0.015707207 |
| MCRS1           | -3.777548964 | 0.001259951 | 0.007385204 |
| GRAMD4          | -3.777651804 | 0.036083946 | 0.095864811 |
| FAM98C          | -3.778311249 | 0.000335393 | 0.002672548 |
| CDAN1           | -3.778617769 | 0.015894635 | 0.052010993 |
| QRSL1P3         | -3.782871906 | 0.010063745 | 0.036766669 |
| USP21           | -3.784145451 | 0.004395085 | 0.019457979 |
| POLB            | -3.786966624 | 0.000558145 | 0.003925167 |
| TBC1D7          | -3.786988874 | 0.030291753 | 0.084774884 |
| DUSP4           | -3.789153128 | 0.025316322 | 0.073820468 |



|                 |              |             |             |
|-----------------|--------------|-------------|-------------|
| EPC1            | -3.789399675 | 0.003677432 | 0.016866859 |
| PLEKHB1         | -3.791071135 | 0.042611182 | 0.108445278 |
| ATF1            | -3.795025135 | 0.013773707 | 0.04659501  |
| TRO             | -3.796915972 | 0.00710869  | 0.028118817 |
| CXXC1           | -3.797065705 | 0.00758962  | 0.029576549 |
| PDGFRB          | -3.799337559 | 0.000853911 | 0.005451339 |
| FEZ2            | -3.801516568 | 0.007461291 | 0.029160951 |
| EIPR1           | -3.80259485  | 0.013214488 | 0.045272618 |
| ZFYVE16         | -3.804048926 | 0.000144628 | 0.001416324 |
| OGFOD3          | -3.804516138 | 0.004340661 | 0.019273425 |
| VPS13B          | -3.804553516 | 0.021255307 | 0.064739366 |
| ENSG00000146722 | -3.805183126 | 0.037194638 | 0.097998237 |
| SELENOO         | -3.805284634 | 0.007009301 | 0.027834835 |
| BEX3            | -3.806188352 | 0.012494654 | 0.043363942 |
| ATP5F1C         | -3.806705028 | 0.000830204 | 0.005325274 |
| RAP1A           | -3.807698909 | 0.020762579 | 0.063622849 |
| CDK20           | -3.809709437 | 0.01020215  | 0.037071997 |
| ZNF554          | -3.809739858 | 0.001310554 | 0.007600837 |
| ABHD16B         | -3.811128371 | 0.02370892  | 0.070164492 |
| PIGX            | -3.811204408 | 0.027092772 | 0.077985947 |
| CIAO2B          | -3.811925004 | 0.046203457 | 0.115320315 |
| PPP1R11         | -3.812338611 | 0.050983367 | 0.124304933 |
| TPRN            | -3.812915135 | 0.03655124  | 0.096774178 |
| ADORA1          | -3.812949582 | 0.036066834 | 0.095840386 |
| DTNBP1          | -3.814231698 | 0.014362695 | 0.048076896 |
| TRIM3           | -3.814484085 | 0.003427488 | 0.01598702  |
| TTC1            | -3.81511569  | 0.003993207 | 0.017989865 |
| HACE1           | -3.816099659 | 0.004070181 | 0.018241795 |
| ELK4            | -3.816750161 | 0.001224654 | 0.007237894 |
| RIPK1           | -3.816915429 | 0.007423085 | 0.02904915  |
| CIAO1           | -3.817900603 | 0.004976349 | 0.021458401 |
| RPSAP21         | -3.819313832 | 0.04547593  | 0.113986468 |
| LEMD2           | -3.821667462 | 0.005474013 | 0.023097508 |
| REEP4           | -3.82322788  | 0.041383458 | 0.10605661  |
| SLC6A12         | -3.823328765 | 0.03193239  | 0.0878761   |
| UBE2Q1          | -3.823987243 | 0.00844682  | 0.032080423 |
| SLC22A23        | -3.824792454 | 0.013154659 | 0.045195569 |
| PAG1            | -3.825946684 | 0.007469202 | 0.029173029 |
| ICMT            | -3.826394635 | 0.009902184 | 0.036342035 |
| SLC24A5         | -3.827172708 | 0.034239428 | 0.0923597   |
| ZNF850          | -3.827255333 | 0.015812179 | 0.051839277 |
| ALDH1A3         | -3.827485239 | 0.025224937 | 0.073607194 |
| TBC1D31         | -3.831949935 | 0.034796306 | 0.093522095 |
| HNRNPA1P76      | -3.833013155 | 0.013112527 | 0.045071215 |

|                 |              |             |             |
|-----------------|--------------|-------------|-------------|
| PIK3R1          | -3.835181038 | 0.003767288 | 0.017142575 |
| GUCD1           | -3.83569329  | 0.003217212 | 0.015206009 |
| CREB5           | -3.839569755 | 0.05065157  | 0.123680978 |
| HMG20A          | -3.840861773 | 0.037716646 | 0.099007217 |
| ENSG00000259232 | -3.841633846 | 0.048152166 | 0.118945678 |
| VAMP2           | -3.842317828 | 0.000131037 | 0.00131297  |
| ROR2            | -3.84373489  | 0.044970131 | 0.112952576 |
| EGR3            | -3.844652202 | 0.01699613  | 0.054582424 |
| ENSG00000179038 | -3.845555662 | 0.037163388 | 0.097958546 |
| USHBP1          | -3.846326468 | 0.006019623 | 0.024715577 |
| PCDH18          | -3.848762896 | 0.020014266 | 0.061783391 |
| ENSG00000275756 | -3.848825699 | 0.034999191 | 0.093996342 |
| SAMD9L          | -3.850303202 | 0.005170162 | 0.022097329 |
| SPTBN2          | -3.851740769 | 0.042536221 | 0.108322832 |
| SMN1            | -3.852011442 | 0.037183706 | 0.097990764 |
| ZNF250          | -3.853168965 | 0.011786412 | 0.041459671 |
| C21orf91        | -3.855280373 | 0.043677449 | 0.11046215  |
| OAF             | -3.855798134 | 0.038747943 | 0.101100815 |
| CMC2            | -3.856031536 | 0.042012034 | 0.107349304 |
| PLEKHA3         | -3.856093342 | 0.003932779 | 0.017768702 |
| ITGB3BP         | -3.857146413 | 0.016225214 | 0.052750468 |
| AP4B1           | -3.860080651 | 0.024077452 | 0.071098678 |
| MKI67           | -3.86078185  | 0.035700075 | 0.095284168 |
| ZNF713          | -3.860954115 | 0.009719165 | 0.035811498 |
| MDH1B           | -3.861752669 | 0.027828661 | 0.079611939 |
| PNPLA7          | -3.862434708 | 0.006850373 | 0.027329238 |
| KCMF1           | -3.866576689 | 0.02128902  | 0.064793134 |
| PIAS2           | -3.867577847 | 0.000282471 | 0.002351302 |
| DPH2            | -3.869953536 | 0.014628434 | 0.04881791  |
| MAEA            | -3.873560977 | 0.001639969 | 0.008977919 |
| FAM120AOS       | -3.873877271 | 0.018166249 | 0.057501119 |
| ST3GAL2         | -3.874208381 | 0.005930919 | 0.024459233 |
| RECK            | -3.875550239 | 0.029904368 | 0.083943059 |
| WRAP53          | -3.875938587 | 0.039279328 | 0.102090828 |
| ITPKB           | -3.879340073 | 0.003139541 | 0.014916279 |
| YEATS4          | -3.879771371 | 0.032890036 | 0.089838693 |
| TNFRSF21        | -3.880712641 | 0.016066314 | 0.052360437 |
| FGF11           | -3.882324014 | 0.04374845  | 0.110572403 |
| U2AF1L5         | -3.883176657 | 0.002068718 | 0.010746679 |
| UPP1            | -3.883881493 | 0.020176857 | 0.062126857 |
| CYP2R1          | -3.8855143   | 0.031393701 | 0.086874567 |
| POGLUT3         | -3.886593985 | 0.00579183  | 0.024008324 |
| SMPDL3B         | -3.886959171 | 0.026191146 | 0.075950559 |
| TBC1D4          | -3.887495488 | 0.015141716 | 0.050171183 |

|          |              |             |             |
|----------|--------------|-------------|-------------|
| KLF13    | -3.888890816 | 0.022762208 | 0.068162488 |
| RAD17    | -3.889439825 | 0.015469042 | 0.050893527 |
| CAMK1    | -3.894069282 | 0.027786276 | 0.079547088 |
| KDM2B    | -3.897107555 | 0.001443181 | 0.008197213 |
| VPS9D1   | -3.897992089 | 0.031080817 | 0.086205824 |
| SRP68    | -3.90076447  | 0.001818212 | 0.009720687 |
| NLRC3    | -3.901634443 | 0.020883709 | 0.063864681 |
| IP6K3    | -3.90271388  | 0.038748074 | 0.101100815 |
| ZNF430   | -3.902836135 | 0.031091554 | 0.086209817 |
| THUMPD2  | -3.905435515 | 0.016514012 | 0.05343106  |
| NCR3LG1  | -3.906107284 | 0.032535466 | 0.089016565 |
| FBXL20   | -3.908145478 | 0.00132278  | 0.007649751 |
| TERF2    | -3.909112444 | 0.007829695 | 0.030307205 |
| SERPINA1 | -3.911683072 | 0.025160049 | 0.073541954 |
| TAF2     | -3.912571378 | 0.032910176 | 0.089838693 |
| EOLA1    | -3.915083319 | 0.029487284 | 0.083022583 |
| VAR1     | -3.915227065 | 0.040750308 | 0.104766721 |
| SNX33    | -3.915548426 | 0.012963864 | 0.044665882 |
| LSM4     | -3.91748462  | 0.035243864 | 0.094504149 |
| RNLS     | -3.92040746  | 0.020110299 | 0.061953438 |
| CWC25    | -3.920576252 | 0.000150877 | 0.001463316 |
| QSOX2    | -3.92212983  | 0.02655231  | 0.076722169 |
| AACS     | -3.922423148 | 0.006185823 | 0.025218322 |
| KNTC1    | -3.926707247 | 0.002289253 | 0.011652277 |
| HMGB1P10 | -3.927004907 | 0.037527841 | 0.098654015 |
| CDHR5    | -3.928063216 | 0.014310087 | 0.047953847 |
| RPL29P11 | -3.928849421 | 0.020820193 | 0.063767111 |
| IL13RA1  | -3.9302738   | 0.000626353 | 0.004311584 |
| HGS      | -3.930605041 | 0.0010778   | 0.006541063 |
| PNMA8A   | -3.931091701 | 0.038079016 | 0.099742137 |
| NEK6     | -3.932380275 | 0.010294076 | 0.037327591 |
| PECR     | -3.934882641 | 0.011746031 | 0.041353681 |
| RANBP10  | -3.936792039 | 0.020975185 | 0.064079668 |
| MOB4     | -3.93819249  | 0.033835493 | 0.091579787 |
| NRCAM    | -3.938803826 | 0.007339969 | 0.028817058 |
| HERC6    | -3.938845564 | 0.029006375 | 0.082011952 |
| CDK17    | -3.939049464 | 0.004783233 | 0.020766232 |
| ZNF141   | -3.939218486 | 0.014352085 | 0.048054671 |
| TIGD6    | -3.939735074 | 0.038741341 | 0.101100815 |
| ARMC8    | -3.940222747 | 0.00059072  | 0.004106881 |
| STRN4    | -3.941396087 | 0.001079441 | 0.006544595 |
| RAD17    | -3.941941516 | 0.007308488 | 0.028721408 |
| SCD5     | -3.945254777 | 0.001350074 | 0.007785278 |
| TOMM22   | -3.945341654 | 0.026781027 | 0.077217139 |

|                 |              |             |             |
|-----------------|--------------|-------------|-------------|
| E2F6            | -3.945642783 | 0.019508898 | 0.060640908 |
| OXA1L           | -3.945842623 | 0.031622452 | 0.087268161 |
| EPHB6           | -3.945997406 | 0.031065252 | 0.086202157 |
| SLC48A1         | -3.946339044 | 0.002046126 | 0.010661349 |
| RASSF7          | -3.94652203  | 0.030920879 | 0.085939454 |
| ERO1A           | -3.946807505 | 0.001257299 | 0.007375924 |
| ENSG00000283145 | -3.947358225 | 0.046702068 | 0.116265289 |
| IL18            | -3.948270504 | 0.031080267 | 0.086205824 |
| DNAJC18         | -3.948761572 | 0.037208374 | 0.098013092 |
| NAV1            | -3.949952447 | 0.00048459  | 0.003505963 |
| TMEM41A         | -3.952733602 | 0.002669915 | 0.013115526 |
| TLCD5           | -3.952923457 | 0.01651089  | 0.05343106  |
| TICRR           | -3.952945528 | 0.022871464 | 0.068405288 |
| SLC22A5         | -3.955838007 | 0.011932814 | 0.041853024 |
| FTO             | -3.956067325 | 2.17E-05    | 0.000322757 |
| NADK2           | -3.957003483 | 0.008498961 | 0.032248097 |
| PALMD           | -3.957815217 | 0.047899149 | 0.118538398 |
| MRPL19          | -3.958567556 | 0.010023712 | 0.036654684 |
| BRD2            | -3.961963005 | 0.019545783 | 0.060708789 |
| CPM             | -3.962073491 | 0.010572952 | 0.0380878   |
| SNX5P1          | -3.962436784 | 0.040006904 | 0.103448743 |
| CCDC12          | -3.963142425 | 0.001426211 | 0.008131348 |
| PDE3A           | -3.965118893 | 0.045414368 | 0.11385574  |
| FGF1            | -3.966916004 | 0.039218647 | 0.101994108 |
| DDX10           | -3.966926368 | 0.021391333 | 0.065022775 |
| C11orf68        | -3.967397484 | 0.005077849 | 0.021771976 |
| AGTPBP1         | -3.969536591 | 0.005083136 | 0.021774107 |
| MRI1            | -3.970956193 | 0.011403969 | 0.040403907 |
| CNOT10          | -3.971006246 | 0.013870414 | 0.04683054  |
| ZPR1            | -3.974238789 | 0.006345019 | 0.025737182 |
| FAM217B         | -3.974476645 | 0.005217506 | 0.02227566  |
| FAM47E          | -3.975946425 | 0.024314887 | 0.071659944 |
| PRPF19          | -3.976088303 | 0.035290546 | 0.094608365 |
| TRIM26          | -3.977841478 | 0.048825329 | 0.120167098 |
| CYP24A1         | -3.977864274 | 0.038293656 | 0.100217603 |
| ZW10            | -3.979304155 | 0.013511834 | 0.045966059 |
| DCAF7           | -3.983095146 | 0.014169809 | 0.047642045 |
| CS              | -3.983661649 | 0.001176465 | 0.007018204 |
| TMEM63A         | -3.984041314 | 0.004729316 | 0.020598646 |
| HTD2            | -3.984063775 | 0.014810891 | 0.049318025 |
| TRIM37          | -3.985464466 | 0.007981023 | 0.030735697 |
| SRP9P1          | -3.987239913 | 0.028404446 | 0.080830129 |
| RALGDS          | -3.987804319 | 0.001883101 | 0.01002774  |
| YEATS2          | -3.98806735  | 0.027111216 | 0.078001939 |

|                 |              |             |             |
|-----------------|--------------|-------------|-------------|
| TUBGCP5         | -3.98982241  | 0.020837201 | 0.063780143 |
| EGFL8           | -3.991038824 | 0.017183969 | 0.055038217 |
| ZER1            | -3.991149444 | 0.006013288 | 0.024714715 |
| CHTF8           | -3.991893144 | 0.018132418 | 0.057463883 |
| PIPSL           | -3.992616065 | 0.0451272   | 0.113276573 |
| HNRNPA1P59      | -3.992664243 | 0.037705878 | 0.099000423 |
| EIF4BP7         | -3.992774058 | 0.047313409 | 0.117473129 |
| OSGEPL1         | -3.993780564 | 0.021165875 | 0.064506474 |
| PCDHGB7         | -3.994884348 | 0.000337933 | 0.002680431 |
| ZNF350          | -3.996436427 | 0.044407157 | 0.111840186 |
| ENSG00000279208 | -3.997593779 | 0.016590157 | 0.053605782 |
| RNF181          | -3.997790112 | 0.021628227 | 0.065643947 |
| C1QC            | -3.99834176  | 0.015565563 | 0.051169357 |
| IMPA2           | -3.998460638 | 0.02419307  | 0.071387839 |
| FAM186B         | -3.999919234 | 0.021635586 | 0.065649821 |
| HAAO            | -4.000379082 | 0.030771826 | 0.085702296 |
| MAPK8IP1        | -4.000935518 | 0.018264557 | 0.057782069 |
| ZNF701          | -4.001528975 | 0.04023561  | 0.103892856 |
| NTAN1P2         | -4.001669285 | 0.03374463  | 0.091436088 |
| NUDT22          | -4.001714874 | 0.002814195 | 0.013712968 |
| SEZ6            | -4.005617799 | 0.045591179 | 0.114228034 |
| POLR1E          | -4.007707477 | 0.033615383 | 0.091160062 |
| YWHAZP5         | -4.007990142 | 0.016012432 | 0.052255184 |
| SCNN1D          | -4.009799718 | 0.031763554 | 0.087594421 |
| SLC25A44        | -4.011185091 | 0.008402549 | 0.031956252 |
| ZC3H12B         | -4.011548526 | 0.003050209 | 0.014598548 |
| EME2            | -4.013798343 | 0.011393112 | 0.040399396 |
| EIF1B           | -4.015237244 | 0.029550615 | 0.08310424  |
| MAML3           | -4.016733111 | 0.000460036 | 0.00336859  |
| UTP4            | -4.018599178 | 0.00472883  | 0.020598646 |
| USP33           | -4.019179121 | 4.95E-05    | 0.000617444 |
| SRP14           | -4.020902248 | 0.003731299 | 0.017042129 |
| SNRNP48         | -4.021094147 | 0.030238337 | 0.084703732 |
| RPL7P21         | -4.022033594 | 0.041707782 | 0.106774744 |
| GLT1D1          | -4.022884205 | 0.049124015 | 0.120705862 |
| TERF1P7         | -4.023309111 | 0.019008062 | 0.059435179 |
| CAMKMT          | -4.024830991 | 0.036382479 | 0.096446239 |
| ID1             | -4.026541769 | 0.029550157 | 0.08310424  |
| VPS52           | -4.026876628 | 0.001709643 | 0.00927129  |
| ELAC1           | -4.027554686 | 0.018806096 | 0.058955965 |
| PPM1K           | -4.02924962  | 0.013884196 | 0.04683788  |
| ZNF507          | -4.030037373 | 0.015017761 | 0.049838296 |
| JPT1            | -4.030150421 | 0.023618439 | 0.069984025 |
| PCDHA14         | -4.031987068 | 0.019537117 | 0.060697449 |

|            |              |             |             |
|------------|--------------|-------------|-------------|
| EMC4       | -4.032385467 | 0.004118679 | 0.018395752 |
| DDX50P1    | -4.034687011 | 0.003211268 | 0.01518921  |
| TMCC1      | -4.037274322 | 0.001797928 | 0.009629255 |
| ZNF844     | -4.037346382 | 0.012965396 | 0.044665882 |
| FBLN7      | -4.037437003 | 0.036935563 | 0.097527934 |
| KRT18P15   | -4.037682121 | 0.010283923 | 0.03730195  |
| CLBA1      | -4.040264075 | 0.014473638 | 0.048368007 |
| LHFPL2     | -4.040279496 | 0.026931004 | 0.07761259  |
| CHTF18     | -4.041045672 | 0.003589174 | 0.016531098 |
| FAM126B    | -4.04151227  | 0.000327862 | 0.00262865  |
| HAUS7      | -4.044033996 | 0.019430425 | 0.060474636 |
| SLC50A1    | -4.044888488 | 0.000156152 | 0.001496487 |
| SLC35A2    | -4.045278178 | 0.004005324 | 0.018009078 |
| NAPRT      | -4.045746407 | 0.021573784 | 0.065495131 |
| GNAL       | -4.048316864 | 0.030486118 | 0.085150913 |
| ZNF454     | -4.049146243 | 0.013273812 | 0.045411593 |
| EPM2A      | -4.050240708 | 0.023429581 | 0.069695661 |
| EPHA2      | -4.051350941 | 0.003076361 | 0.014688867 |
| HOMER3     | -4.05313957  | 0.003806288 | 0.017285564 |
| VWA7       | -4.056023949 | 0.00471722  | 0.020560759 |
| TAF5L      | -4.057190386 | 0.034760051 | 0.093455276 |
| HNRNPA1P10 | -4.057360461 | 0.018328816 | 0.057897544 |
| USP51      | -4.058118949 | 0.036968288 | 0.097571775 |
| RORA       | -4.059170349 | 0.000216644 | 0.00192248  |
| HVCN1      | -4.060671344 | 0.019689289 | 0.061060505 |
| ATP5MF     | -4.062954003 | 0.000824372 | 0.005299094 |
| ZNF708     | -4.063854175 | 0.000255059 | 0.002174108 |
| ZNF114     | -4.063900191 | 0.01328829  | 0.045435442 |
| GRAMD1C    | -4.0645673   | 0.011385656 | 0.040391163 |
| CD101      | -4.064600258 | 0.034682486 | 0.093288181 |
| ABCA13     | -4.065835815 | 0.015745959 | 0.051678169 |
| STMP1      | -4.066045145 | 0.01863847  | 0.05856699  |
| ZCWPW1     | -4.066287525 | 0.013460273 | 0.045868002 |
| EEF1A1P12  | -4.066784543 | 0.000365258 | 0.002819566 |
| COMMD7     | -4.066846783 | 0.013449808 | 0.04586556  |
| CCHCR1     | -4.067132905 | 0.015300287 | 0.050551228 |
| AGAP14P    | -4.06882953  | 0.020396928 | 0.062692843 |
| ADGRL2     | -4.069736254 | 0.001566688 | 0.008714699 |
| LINC01881  | -4.071990588 | 0.020042    | 0.061837462 |
| CCDC90B    | -4.072945626 | 1.99E-05    | 0.000301348 |
| KNOP1      | -4.074265648 | 0.002849506 | 0.013818275 |
| PKNOX1     | -4.079494191 | 0.001673283 | 0.009135508 |
| FAHD2A     | -4.082145862 | 1.00E-04    | 0.001058744 |
| ZFP1       | -4.082399157 | 0.031937125 | 0.0878761   |

|                 |              |             |             |
|-----------------|--------------|-------------|-------------|
| CEP78           | -4.083767151 | 0.006666086 | 0.026752753 |
| MPC1            | -4.083952058 | 0.032036138 | 0.088009522 |
| RNF20           | -4.084266688 | 0.033564828 | 0.091091632 |
| POLN            | -4.084417134 | 0.034465264 | 0.092827672 |
| PRXL2C          | -4.084726949 | 0.04614646  | 0.115237621 |
| PDGFA           | -4.085562193 | 0.00992208  | 0.036359931 |
| B9D1            | -4.08576874  | 0.037750628 | 0.099074934 |
| ZNF615          | -4.086519662 | 0.008263819 | 0.0315836   |
| IFI6            | -4.087300545 | 0.005574144 | 0.023353908 |
| ANKRD20A11P     | -4.088160552 | 0.01728282  | 0.055268495 |
| HSD11B1L        | -4.089538785 | 0.050858441 | 0.12403598  |
| PLA2G7          | -4.089551998 | 0.039963797 | 0.1033917   |
| CCDC32          | -4.089662791 | 0.007056943 | 0.027941525 |
| FCF1P7          | -4.090795713 | 0.005283911 | 0.022488328 |
| METTL2A         | -4.090816653 | 0.034415238 | 0.092734204 |
| UTP15           | -4.091089646 | 0.014021705 | 0.047249085 |
| ENSG00000214135 | -4.091270015 | 0.013172692 | 0.045239612 |
| IMMP1LP1        | -4.09207711  | 0.02193019  | 0.066238423 |
| DZIP3           | -4.092127218 | 0.005283645 | 0.022488328 |
| CHTOP           | -4.092667205 | 0.000412678 | 0.003096746 |
| DYNLT1          | -4.093605081 | 0.014694173 | 0.048996215 |
| CCDC102B        | -4.093726641 | 0.015943312 | 0.052098929 |
| SLC9C1          | -4.094859606 | 0.016830188 | 0.054265474 |
| FAM126A         | -4.096461499 | 0.022751476 | 0.068162488 |
| DDX55           | -4.097345411 | 0.000564686 | 0.003962292 |
| SHC1            | -4.10058894  | 0.000142155 | 0.001397759 |
| GTF2H2C         | -4.101329231 | 0.01179089  | 0.041463373 |
| PWWP2B          | -4.102740116 | 0.050128477 | 0.12265112  |
| NR6A1           | -4.10377898  | 0.008574965 | 0.032424671 |
| CYRIB           | -4.104099119 | 0.000744664 | 0.00491935  |
| OR2A9P          | -4.104162378 | 0.001724633 | 0.009331675 |
| OXSM            | -4.104456668 | 0.046416842 | 0.115674174 |
| PIGH            | -4.10553918  | 0.002281118 | 0.011620644 |
| BBS5            | -4.105949464 | 0.00054864  | 0.003870865 |
| TUBD1           | -4.106500226 | 0.001032073 | 0.006315578 |
| NAA38           | -4.107406325 | 0.033775636 | 0.091458681 |
| PSMD10          | -4.107437077 | 0.029333337 | 0.082685307 |
| ZNF702P         | -4.107534225 | 0.03597743  | 0.095707872 |
| BRPF1           | -4.108511817 | 0.039079723 | 0.101681204 |
| TOMM7           | -4.108666827 | 0.013247072 | 0.045345746 |
| FOXRED2         | -4.110288251 | 0.03200748  | 0.088009522 |
| NDFIP1          | -4.110990818 | 0.005522812 | 0.02320344  |
| SLC9A5          | -4.111674405 | 0.004496384 | 0.019776246 |
| ATP5MC1         | -4.112974207 | 0.007343421 | 0.028821261 |

|                 |              |             |             |
|-----------------|--------------|-------------|-------------|
| CCNJL           | -4.115581661 | 0.01410332  | 0.04747124  |
| ZFPM1           | -4.116609105 | 0.041052265 | 0.1054087   |
| MARCHF9         | -4.11735997  | 0.037280577 | 0.098140998 |
| IFI35           | -4.11739977  | 0.023613331 | 0.069984025 |
| FAM47E-STBD1    | -4.117728393 | 0.022922853 | 0.068512586 |
| TCEA2           | -4.118032392 | 0.001561039 | 0.008689603 |
| NUTM2D          | -4.119194284 | 0.018684364 | 0.05866551  |
| LCMT1           | -4.121078156 | 0.018166047 | 0.057501119 |
| ST6GALNAC6      | -4.1216699   | 0.00411164  | 0.018377876 |
| ANAPC11         | -4.122848081 | 0.013605667 | 0.046155548 |
| MYG1            | -4.123703996 | 0.037087391 | 0.097822135 |
| ASB8            | -4.124873319 | 0.002396006 | 0.012098982 |
| SYT17           | -4.125939427 | 0.004227325 | 0.01884624  |
| MZB1            | -4.126642384 | 0.036496115 | 0.096662797 |
| ZNF197          | -4.127425059 | 0.011123467 | 0.039634513 |
| GUCY1A2         | -4.127765382 | 0.013807808 | 0.04665821  |
| POLR2K          | -4.12983404  | 0.035944733 | 0.09566294  |
| NOC3L           | -4.130385639 | 7.96E-05    | 0.00090428  |
| RPUSD1          | -4.131253309 | 0.017672358 | 0.056305927 |
| COG3            | -4.13136745  | 0.00036145  | 0.002801482 |
| XRCC4           | -4.132219266 | 0.0362743   | 0.096272521 |
| SLC1A3          | -4.133152503 | 0.030320755 | 0.084836436 |
| RIOK1           | -4.134325177 | 0.00847364  | 0.03217219  |
| BSPRY           | -4.13449807  | 0.03502284  | 0.094027024 |
| ENSG00000253330 | -4.135564467 | 0.018329758 | 0.057897544 |
| DR1             | -4.136254047 | 0.004107156 | 0.018364615 |
| CYP20A1         | -4.136771366 | 0.013605279 | 0.046155548 |
| NCF1            | -4.13781138  | 0.01862192  | 0.05856699  |
| ITGB1BP1        | -4.138034183 | 0.000754477 | 0.004960448 |
| ZNF620          | -4.138237661 | 0.010954406 | 0.039147365 |
| TTI2            | -4.138447104 | 0.013862714 | 0.046817603 |
| SHF             | -4.138707309 | 0.004013272 | 0.018031417 |
| PWWP2A          | -4.139199551 | 0.003061454 | 0.014640789 |
| CSF3R           | -4.141792445 | 0.004747331 | 0.020654813 |
| MRPS31          | -4.142686397 | 0.006653886 | 0.026730379 |
| DUSP8           | -4.143468065 | 0.013183923 | 0.04525743  |
| RTKL1P1         | -4.143678049 | 0.030471059 | 0.085150913 |
| MAPK3           | -4.143878561 | 0.001704831 | 0.009249341 |
| FBXW8           | -4.145339907 | 0.028793232 | 0.081599925 |
| VEZF1           | -4.145379736 | 0.024541256 | 0.072221581 |
| CHRN1           | -4.145845286 | 4.31E-05    | 0.000554157 |
| TTC31           | -4.146143436 | 0.000249278 | 0.002139905 |
| ENSG00000229689 | -4.146891177 | 0.017670102 | 0.056305927 |
| PI4K2A          | -4.14856797  | 0.030911163 | 0.085932181 |



|                 |              |             |             |
|-----------------|--------------|-------------|-------------|
| NOL4L           | -4.149015611 | 0.000497405 | 0.003575172 |
| RABAC1          | -4.149565864 | 0.004315123 | 0.019188189 |
| MLST8           | -4.150315289 | 0.000703521 | 0.004704649 |
| ERI3            | -4.152677159 | 0.005883525 | 0.024296892 |
| PIH1D2          | -4.155439156 | 0.028842873 | 0.081677985 |
| C1QA            | -4.155801112 | 0.028117747 | 0.080192555 |
| NKIRAS1         | -4.156497095 | 0.032530655 | 0.089016565 |
| BAG2            | -4.157840526 | 0.007962854 | 0.030695027 |
| LIN9            | -4.157872589 | 0.017267253 | 0.055247907 |
| MATR3           | -4.158174921 | 0.033077905 | 0.090113653 |
| RHOD            | -4.15987163  | 0.034925431 | 0.093837384 |
| ENSG00000268279 | -4.160311844 | 0.00611906  | 0.025009078 |
| SRPX            | -4.161231855 | 0.036955598 | 0.097559556 |
| CPNE3           | -4.161602228 | 0.00179579  | 0.009622063 |
| ORC4            | -4.162306689 | 0.000132328 | 0.001322623 |
| ATP6V0D1        | -4.162758397 | 0.000376807 | 0.00289029  |
| FBXO4           | -4.162832506 | 0.018635276 | 0.05856699  |
| TRIM4           | -4.163316626 | 0.006345355 | 0.025737182 |
| MAPRE3          | -4.165010476 | 0.024732008 | 0.072580512 |
| TMEM39A         | -4.166058219 | 0.00186445  | 0.009945924 |
| MSH5            | -4.166684932 | 0.025867975 | 0.075139423 |
| GMCL1           | -4.168268325 | 0.007596178 | 0.029583055 |
| HMBS            | -4.1688226   | 0.006677219 | 0.026788549 |
| SLC25A1         | -4.169845466 | 0.002252263 | 0.011508055 |
| GATB            | -4.172068333 | 0.000994704 | 0.006136545 |
| TTC33           | -4.172930395 | 0.017865378 | 0.056741677 |
| GNRHR           | -4.173738313 | 0.048260892 | 0.119141309 |
| ABCD3           | -4.174331317 | 0.009517325 | 0.035207114 |
| SPIRE1          | -4.175005537 | 0.004102711 | 0.018358303 |
| ENSG00000228897 | -4.175014714 | 0.017583508 | 0.056126262 |
| TMEM141         | -4.176185076 | 0.002125262 | 0.010997934 |
| ENSG00000235859 | -4.178754437 | 0.003534803 | 0.01634897  |
| CSF2RB          | -4.180071242 | 0.022539273 | 0.067712922 |
| PLA2G12A        | -4.180222167 | 0.01413602  | 0.047554859 |
| ZNF876P         | -4.180979973 | 0.009707956 | 0.035781089 |
| GALNTL6         | -4.181970085 | 0.049757981 | 0.121867786 |
| TCEAL4          | -4.182609814 | 0.003460815 | 0.016080503 |
| SMAD7           | -4.183524261 | 0.01816242  | 0.057501119 |
| ZNF304          | -4.184545339 | 0.01172326  | 0.041298143 |
| AKAP10          | -4.187294888 | 0.000248306 | 0.002134584 |
| MTHFD1L         | -4.189146537 | 0.001726568 | 0.00933797  |
| STXBP5          | -4.191532371 | 0.001863547 | 0.009945489 |
| TMEM86B         | -4.193474108 | 0.028997648 | 0.082006431 |
| LANCL3          | -4.193717467 | 0.012496153 | 0.043363942 |

|                 |              |             |             |
|-----------------|--------------|-------------|-------------|
| PCDHGB8P        | -4.193872172 | 0.006488394 | 0.026176303 |
| OMA1            | -4.197523801 | 0.005522894 | 0.02320344  |
| RBBP4P2         | -4.199831176 | 0.02600678  | 0.075506372 |
| C1orf116        | -4.200839716 | 0.012769792 | 0.044086015 |
| EGFEM1P         | -4.20134513  | 0.036278139 | 0.096272521 |
| FAM124A         | -4.201863083 | 0.050689464 | 0.123748542 |
| SAXO2           | -4.202749408 | 0.005693687 | 0.023736624 |
| EMC9            | -4.203197671 | 0.03517266  | 0.094368073 |
| HGH1            | -4.203339737 | 0.019852622 | 0.061472535 |
| C17orf75        | -4.204547038 | 1.37E-05    | 0.000219865 |
| DNAJC17         | -4.204649789 | 0.016469995 | 0.053326271 |
| MIF             | -4.205140167 | 0.000355012 | 0.002765167 |
| IDI1            | -4.205382845 | 0.017022763 | 0.054624475 |
| EEF1AKMT2       | -4.206326939 | 0.008714004 | 0.03278654  |
| ENSG00000170089 | -4.20640838  | 0.012324364 | 0.042927798 |
| MED20           | -4.206966499 | 0.009881453 | 0.036287957 |
| TAF1A           | -4.207416642 | 0.050709598 | 0.123770884 |
| TOP3A           | -4.207493136 | 0.00122209  | 0.007229805 |
| AAMDC           | -4.208614395 | 0.050114401 | 0.122641471 |
| IRX3            | -4.208829666 | 0.047709924 | 0.118190936 |
| INHBA           | -4.211896825 | 0.02477103  | 0.072646289 |
| WNT5A           | -4.211971274 | 0.004628155 | 0.020208941 |
| LRRC14          | -4.212855984 | 0.011542384 | 0.040779049 |
| FNTB            | -4.214628003 | 0.02260629  | 0.067813269 |
| DHX32           | -4.21505802  | 0.030781838 | 0.085703245 |
| RABL2A          | -4.215251477 | 0.004613526 | 0.020161938 |
| HMG3BP24        | -4.21536779  | 0.035757982 | 0.095396652 |
| RBAK            | -4.21562941  | 0.01349845  | 0.04596102  |
| GVQW3           | -4.217068652 | 0.005390663 | 0.022822172 |
| GK              | -4.21799975  | 0.031016089 | 0.086106528 |
| ZNF37BP         | -4.218789008 | 0.001045395 | 0.006374538 |
| ADAM8           | -4.219778124 | 0.047364869 | 0.11755267  |
| BORCS5          | -4.220013801 | 0.034245731 | 0.0923597   |
| AFAP1           | -4.220185154 | 0.027132605 | 0.078044927 |
| CYREN           | -4.220350173 | 0.002222193 | 0.011404712 |
| BIRC2           | -4.221293552 | 0.00012445  | 0.00125948  |
| VPS4A           | -4.221410832 | 0.003318209 | 0.015561255 |
| POLE4           | -4.221937061 | 0.011384382 | 0.040391163 |
| BMT2            | -4.222044233 | 0.030830539 | 0.085786862 |
| AP2B1           | -4.222279044 | 0.001120919 | 0.006736644 |
| PRPF4B          | -4.222792432 | 0.00270608  | 0.013260889 |
| FAM228B         | -4.225748439 | 0.000993006 | 0.006132321 |
| EIF3FP3         | -4.226728443 | 0.031997471 | 0.088002455 |
| EID3            | -4.227838104 | 0.025224437 | 0.073607194 |

|                 |              |             |             |
|-----------------|--------------|-------------|-------------|
| CACNB4          | -4.228431461 | 0.025033335 | 0.07326003  |
| ALDH4A1         | -4.229345095 | 0.006338364 | 0.025727553 |
| TDP2            | -4.230221237 | 0.000895815 | 0.00566803  |
| TPTE2P5         | -4.232863381 | 0.014208888 | 0.04773366  |
| MCTS1           | -4.23318502  | 0.004639183 | 0.020242492 |
| ZDHHC3          | -4.234179281 | 0.023753186 | 0.070261136 |
| OTULIN          | -4.234339971 | 0.005829652 | 0.024107315 |
| FAM104A         | -4.234399161 | 0.008402951 | 0.031956252 |
| CBFA2T3         | -4.235727391 | 0.010165594 | 0.036983573 |
| BORCS7          | -4.236035779 | 0.026775169 | 0.077217139 |
| OSBP            | -4.238455432 | 0.008367175 | 0.031877961 |
| THG1L           | -4.238813717 | 0.027809716 | 0.079576548 |
| TRAF3IP1        | -4.239567496 | 0.005629954 | 0.023522597 |
| TDRKH           | -4.239727154 | 0.002966184 | 0.014292472 |
| ENSG00000260914 | -4.239743605 | 4.70E-05    | 0.000596518 |
| CCDC77          | -4.241728236 | 0.033225641 | 0.09041438  |
| EXTL2           | -4.244738398 | 0.013028905 | 0.044852635 |
| SUMO3           | -4.245297442 | 0.000743577 | 0.004915489 |
| SEPTIN7P14      | -4.247441794 | 0.028335821 | 0.080710551 |
| TPTEP1          | -4.248073671 | 0.011692073 | 0.041223669 |
| SLC25A40        | -4.249359779 | 0.043774571 | 0.110615326 |
| MAK16           | -4.249861995 | 0.050479452 | 0.123335342 |
| RANBP17         | -4.250025088 | 0.004002329 | 0.018002301 |
| TXN             | -4.250594869 | 0.050722339 | 0.123770884 |
| TNFRSF10C       | -4.251813153 | 0.030289582 | 0.084774884 |
| TNIP2           | -4.254491959 | 0.007364523 | 0.02887599  |
| PRRG2           | -4.255072971 | 0.029121249 | 0.082221505 |
| CASP2           | -4.255835624 | 0.012082907 | 0.042234888 |
| ASCC2           | -4.256184514 | 0.002006032 | 0.010506709 |
| ACP6            | -4.25816625  | 0.00406375  | 0.018231145 |
| AQP1            | -4.259931492 | 0.014231918 | 0.04775801  |
| NHLRC3          | -4.260583701 | 0.000142416 | 0.00139919  |
| IRGQ            | -4.261756872 | 0.043240428 | 0.109741628 |
| CFH             | -4.263199008 | 0.006010189 | 0.024714715 |
| PTMS            | -4.263591254 | 0.049417543 | 0.121210831 |
| C8orf76         | -4.264412505 | 0.013191934 | 0.04525743  |
| CD34            | -4.264574881 | 0.000156719 | 0.001498363 |
| BARD1           | -4.265441431 | 0.00892836  | 0.033499338 |
| RPS3AP26        | -4.266164464 | 0.005691619 | 0.023736624 |
| TEAD2           | -4.267857949 | 0.008638552 | 0.032585808 |
| SHLD2P3         | -4.268088107 | 0.043122818 | 0.10947118  |
| CPNE1           | -4.268481822 | 7.97E-05    | 0.000904538 |
| RAB4B           | -4.269349553 | 0.000602241 | 0.004172593 |
| PPP2R5B         | -4.269460041 | 0.035379303 | 0.094762355 |

|                 |              |             |             |
|-----------------|--------------|-------------|-------------|
| PCDH7           | -4.269612077 | 0.00033992  | 0.002687386 |
| ITPRIPL2        | -4.271011362 | 0.000727891 | 0.004832906 |
| RRN3            | -4.271362262 | 0.00387001  | 0.017545994 |
| NPM2            | -4.272192336 | 0.049566342 | 0.12149676  |
| SIVA1           | -4.275041087 | 0.002239366 | 0.011475209 |
| COQ8A           | -4.275108174 | 0.005696597 | 0.023736624 |
| IL18BP          | -4.275453539 | 0.001994625 | 0.010478705 |
| MRPL35          | -4.275548995 | 0.04776819  | 0.11828686  |
| UTP18           | -4.275582948 | 0.012424637 | 0.043165272 |
| RABGGTA         | -4.275742001 | 0.000329722 | 0.002637776 |
| KIAA0825        | -4.275745399 | 0.00014736  | 0.00143611  |
| PHF14           | -4.276217945 | 0.00287935  | 0.013935087 |
| FBXO44          | -4.277328859 | 0.000701146 | 0.004691363 |
| POLR3F          | -4.27829794  | 0.01077051  | 0.038581312 |
| MTFMT           | -4.278501613 | 0.00587141  | 0.024255136 |
| PDPK2P          | -4.280230631 | 0.000678998 | 0.004583708 |
| FAM104B         | -4.28033369  | 0.024797435 | 0.072675098 |
| CDH24           | -4.28063245  | 0.005801687 | 0.024024502 |
| PSD4            | -4.282144731 | 2.33E-05    | 0.000343237 |
| DPY30           | -4.282791077 | 0.04000522  | 0.103448743 |
| LPCAT3          | -4.283071848 | 0.004531897 | 0.019874667 |
| MRPS28          | -4.285446239 | 0.007319062 | 0.028753627 |
| LYRM1           | -4.285506457 | 0.008230511 | 0.031486127 |
| SZRD1           | -4.285978321 | 0.016012326 | 0.052255184 |
| NOB1            | -4.286173509 | 0.016800939 | 0.054185601 |
| PLEKHG6         | -4.287651694 | 0.000975599 | 0.00606505  |
| GAPDHP2         | -4.287981747 | 0.031599391 | 0.087244303 |
| ARL4AP4         | -4.288059097 | 0.005232087 | 0.022306862 |
| ZRANB3          | -4.289812151 | 0.03290029  | 0.089838693 |
| SENP5           | -4.290410192 | 0.000174226 | 0.001619688 |
| KCNK1           | -4.290455642 | 0.024264362 | 0.071545879 |
| AGAP6           | -4.292015698 | 0.026217379 | 0.07600842  |
| CCDC158         | -4.292132494 | 0.016448745 | 0.053291115 |
| ENSG00000229273 | -4.292288677 | 0.019906325 | 0.061580151 |
| MAP3K21         | -4.292302786 | 0.013193679 | 0.04525743  |
| AK4             | -4.29237355  | 0.026248303 | 0.076047984 |
| SIK2            | -4.292861254 | 0.020075174 | 0.061904199 |
| PARP16          | -4.293041873 | 0.027353575 | 0.078549863 |
| POLR3C          | -4.293467361 | 0.017749544 | 0.056462676 |
| CADPS2          | -4.293603195 | 0.003135653 | 0.014907286 |
| GJC1            | -4.294832957 | 0.007265172 | 0.028597607 |
| KLHL3           | -4.295229465 | 0.003475941 | 0.016138395 |
| PCDHGB6         | -4.295690308 | 0.03996776  | 0.1033917   |
| DDX52           | -4.296195868 | 0.000988666 | 0.006111755 |

|                 |              |             |             |
|-----------------|--------------|-------------|-------------|
| WDR35           | -4.296393334 | 0.001308866 | 0.007597643 |
| TANGO2          | -4.296493482 | 0.000201047 | 0.001810623 |
| ARF4            | -4.300074587 | 0.005546384 | 0.023269821 |
| MCPH1           | -4.300430084 | 0.018878967 | 0.059153771 |
| WWTR1           | -4.301490138 | 0.000152126 | 0.001471893 |
| SARDH           | -4.301992636 | 0.01422786  | 0.04775801  |
| CLDN7           | -4.302716961 | 0.001449631 | 0.008218422 |
| MRPL17          | -4.305104869 | 0.00962411  | 0.03550449  |
| YIPF6           | -4.305324379 | 1.32E-05    | 0.000213573 |
| MBP             | -4.305801379 | 0.006915256 | 0.027533636 |
| NIPSNAP1        | -4.306848928 | 0.04256074  | 0.108362474 |
| DHX8            | -4.309522266 | 0.000709935 | 0.004737078 |
| ENSG00000284776 | -4.309696363 | 0.028745347 | 0.081502385 |
| ZNF275          | -4.309819349 | 0.031899831 | 0.087813407 |
| RBM41           | -4.309850871 | 0.004791802 | 0.020795976 |
| HAPLN3          | -4.31169173  | 0.027581211 | 0.079147222 |
| PIGS            | -4.311839447 | 0.00032793  | 0.00262865  |
| FBXO6           | -4.312195073 | 0.046479953 | 0.115794559 |
| DGKI            | -4.313119113 | 0.002070013 | 0.01074859  |
| RPL36AP13       | -4.31555659  | 0.028971025 | 0.081969445 |
| PHYH            | -4.315874302 | 0.016916397 | 0.054435908 |
| CYTIP           | -4.315947936 | 0.041103956 | 0.105519043 |
| SHANK2          | -4.316276146 | 0.011062739 | 0.039464603 |
| RPL7P46         | -4.318132561 | 0.048653214 | 0.119865357 |
| NPM1P26         | -4.319628861 | 0.002329951 | 0.011829586 |
| ZNF26           | -4.320197521 | 0.001119415 | 0.006734296 |
| COQ10B          | -4.320682596 | 0.021078047 | 0.064296544 |
| TBL2            | -4.320752409 | 0.001965502 | 0.010379769 |
| EMB             | -4.320793626 | 6.97E-05    | 0.000815037 |
| KHDRBS1         | -4.320835622 | 0.002420913 | 0.012168906 |
| ABHD17B         | -4.321086673 | 0.021310366 | 0.064828105 |
| ENSG00000223804 | -4.321526709 | 0.011532732 | 0.040759346 |
| FABP5P9         | -4.321639881 | 0.041842364 | 0.107028734 |
| GPX2            | -4.321909172 | 0.032076412 | 0.088099136 |
| L3MBTL4         | -4.323117752 | 0.007295792 | 0.028680828 |
| CHADL           | -4.32354378  | 0.027692681 | 0.079373008 |
| ZSWIM7          | -4.326032976 | 0.013498961 | 0.04596102  |
| ZNF623          | -4.326265458 | 0.001352795 | 0.007793539 |
| CDHR3           | -4.327631843 | 0.04484465  | 0.112707568 |
| KDR             | -4.328482096 | 0.002408031 | 0.012129342 |
| HELLS           | -4.329448688 | 0.000566338 | 0.003971433 |
| SAYSD1          | -4.329474221 | 0.006396714 | 0.02590359  |
| PLAA            | -4.329569385 | 0.001366723 | 0.007855087 |
| IFT46           | -4.331721722 | 0.007728904 | 0.029964977 |

|                 |              |             |             |
|-----------------|--------------|-------------|-------------|
| CCSER1          | -4.33180827  | 0.00539982  | 0.022852945 |
| LACTB2          | -4.331888002 | 0.020908333 | 0.063923835 |
| FLT3LG          | -4.333977797 | 0.018339243 | 0.057912391 |
| EDRF1           | -4.335228061 | 0.00256959  | 0.012757306 |
| ARMC1           | -4.338272275 | 0.019839243 | 0.061462553 |
| RILP            | -4.338586558 | 0.044264092 | 0.111572798 |
| TEKT4P2         | -4.339699071 | 0.042302311 | 0.107863318 |
| PDE2A           | -4.339890796 | 0.0078467   | 0.030345374 |
| DXO             | -4.340438053 | 0.01755761  | 0.056058379 |
| PCYOX1L         | -4.340510986 | 0.011236812 | 0.039932583 |
| ZSCAN30         | -4.343213198 | 9.73E-05    | 0.001040309 |
| MRPL28          | -4.345119043 | 0.011847576 | 0.04163258  |
| CXCR6           | -4.345859919 | 0.005698679 | 0.023736624 |
| AK1             | -4.345876411 | 0.002573522 | 0.012771592 |
| SLC27A2         | -4.346404876 | 0.044648163 | 0.112307016 |
| PSKH1           | -4.346469607 | 0.004758513 | 0.020685881 |
| ENSG00000165121 | -4.347041645 | 0.012931802 | 0.044581752 |
| AKAP8           | -4.348543706 | 0.023398128 | 0.06961921  |
| HAVCR2          | -4.348656275 | 0.040390669 | 0.104179577 |
| CTNNBIP1        | -4.35003911  | 0.019494094 | 0.060616785 |
| DGCR2           | -4.352122901 | 0.000793668 | 0.005167592 |
| MTHFD2L         | -4.35275705  | 0.045985066 | 0.114937642 |
| ZNF226          | -4.352810705 | 0.043473285 | 0.110152949 |
| CDYL2           | -4.353164335 | 0.040536103 | 0.10440104  |
| ZNF420          | -4.354078456 | 0.023305548 | 0.06939492  |
| ESRP2           | -4.354112307 | 0.000300661 | 0.002458918 |
| POLR2J4         | -4.354357168 | 0.034396367 | 0.092724637 |
| TRPT1           | -4.355165216 | 0.014071751 | 0.04739134  |
| CASP3           | -4.356307131 | 0.010351457 | 0.037468314 |
| MXD1            | -4.356898761 | 0.00609142  | 0.024942676 |
| MAD2L1BP        | -4.358169544 | 0.047691701 | 0.118169979 |
| KAT8            | -4.359348645 | 0.002118561 | 0.01096795  |
| SPINT1          | -4.359387966 | 0.000115496 | 0.001185718 |
| C6orf47         | -4.362309033 | 0.002734433 | 0.013378164 |
| CUEDC1          | -4.362420093 | 0.005227504 | 0.022295175 |
| THAP7           | -4.362829037 | 0.020270174 | 0.062382454 |
| DDX18P3         | -4.362937292 | 0.002614983 | 0.012919084 |
| PLEKHM2         | -4.363373981 | 0.000978545 | 0.006077119 |
| DLSTP1          | -4.363756023 | 0.00594405  | 0.024502918 |
| CHRM3           | -4.364172559 | 0.010995873 | 0.03926078  |
| ANOS1           | -4.365418    | 0.041128642 | 0.105560025 |
| ZNF486          | -4.365623795 | 0.012580094 | 0.043571169 |
| ATP6AP2         | -4.365987672 | 0.003614525 | 0.016616105 |
| KIF5A           | -4.367182987 | 0.007868618 | 0.030399538 |

|                 |              |             |             |
|-----------------|--------------|-------------|-------------|
| TRAPPC14        | -4.367542559 | 0.000697349 | 0.004673703 |
| RBL1            | -4.370978983 | 0.001146141 | 0.006867765 |
| ATL1            | -4.371254566 | 0.021795764 | 0.065937497 |
| MKRN2           | -4.372071608 | 0.009970496 | 0.036477192 |
| PLAT            | -4.374167549 | 0.000993806 | 0.006134128 |
| NRSN2           | -4.374441863 | 0.035625878 | 0.095168465 |
| SFXN2           | -4.374447483 | 0.02520533  | 0.07358852  |
| L3HYPDH         | -4.375084595 | 0.005698829 | 0.023736624 |
| BLOC1S5         | -4.377501575 | 0.022639579 | 0.06787948  |
| ZNF707          | -4.378594271 | 0.004913126 | 0.021261522 |
| IL33            | -4.380333667 | 0.037986533 | 0.099607669 |
| CLPX            | -4.380397065 | 0.000130984 | 0.00131297  |
| ENOX2           | -4.380896157 | 0.037421891 | 0.098446983 |
| OCRL            | -4.381100153 | 6.96E-05    | 0.000814723 |
| SHISA6          | -4.381320764 | 0.029757295 | 0.083588373 |
| GABBR1          | -4.381562492 | 0.016154875 | 0.052564141 |
| ZNF653          | -4.383363223 | 0.02512371  | 0.073488976 |
| ZNF665          | -4.384075084 | 0.021261027 | 0.064740497 |
| HLCS            | -4.38516364  | 0.000264004 | 0.002239316 |
| ZNF234          | -4.38532921  | 0.018504314 | 0.058327141 |
| COPG2           | -4.385360455 | 0.000878581 | 0.005579402 |
| NUBP1           | -4.385647511 | 0.003545775 | 0.016387196 |
| MMS22L          | -4.385768828 | 2.86E-06    | 5.70E-05    |
| PPIAP53         | -4.386241762 | 0.01328572  | 0.045435442 |
| C3orf35         | -4.386879102 | 0.022868407 | 0.068405288 |
| PIGU            | -4.388023446 | 0.014721182 | 0.049046294 |
| NDUFA2          | -4.389049518 | 0.004987336 | 0.021481465 |
| SEC14L1P1       | -4.389825917 | 0.021726661 | 0.06578244  |
| SNRPD1          | -4.390947764 | 0.003450733 | 0.016045974 |
| ENSG00000228007 | -4.391221473 | 0.019413069 | 0.060451708 |
| SMG1P6          | -4.39159508  | 0.005373573 | 0.022773715 |
| PFKFB3          | -4.392721479 | 0.00192062  | 0.010182735 |
| FAM174C         | -4.392723034 | 0.042092217 | 0.107486117 |
| THEM4           | -4.393394293 | 0.005520717 | 0.02320344  |
| SPI1            | -4.393427507 | 0.028589884 | 0.081175689 |
| ABCC4           | -4.393485268 | 0.013800977 | 0.046648151 |
| TMC8            | -4.39666161  | 0.001959941 | 0.010354923 |
| CCDC9B          | -4.397071792 | 0.01461808  | 0.048796812 |
| NDUFA11         | -4.397110681 | 0.015847062 | 0.051899846 |
| SCARA3          | -4.397203532 | 0.000648506 | 0.004419968 |
| RICTOR          | -4.39803733  | 0.001028434 | 0.006302868 |
| ZKSCAN3         | -4.398262179 | 0.006347116 | 0.025737182 |
| CCT5            | -4.398693508 | 0.003757536 | 0.017111067 |
| ZNF239          | -4.398971737 | 0.037443744 | 0.098483067 |

|                 |              |             |             |
|-----------------|--------------|-------------|-------------|
| EIF1AD          | -4.399125745 | 0.019264481 | 0.060081752 |
| RWDD4           | -4.39923074  | 0.002738932 | 0.013389559 |
| CDH12P2         | -4.401361299 | 0.025143977 | 0.07352737  |
| SLC19A2         | -4.403616122 | 0.028456198 | 0.080928691 |
| COMMD2          | -4.403706623 | 0.040392825 | 0.104179577 |
| KIF18A          | -4.404079908 | 0.018637523 | 0.05856699  |
| LINC01347       | -4.405611296 | 0.000846673 | 0.0054137   |
| UBR1            | -4.407252879 | 0.000475902 | 0.003458587 |
| VPS37B          | -4.408016917 | 0.001170524 | 0.006989652 |
| COX7A2L         | -4.408054485 | 0.000450603 | 0.003311422 |
| LRRC37A2        | -4.408457355 | 0.039225262 | 0.101994108 |
| GOSR2           | -4.408480712 | 0.002200981 | 0.011326818 |
| MIEN1           | -4.410232274 | 0.010563784 | 0.038077438 |
| SNHG32          | -4.410713775 | 0.011020018 | 0.039323792 |
| MAGOH           | -4.411156589 | 0.039805941 | 0.103127378 |
| HLA-C           | -4.411767251 | 0.00271129  | 0.01327567  |
| TCEA1P2         | -4.411956716 | 0.000889979 | 0.005636997 |
| AGO4            | -4.412245171 | 0.040817281 | 0.104849823 |
| NOP16           | -4.414970523 | 0.024250001 | 0.071538388 |
| NPM1P27         | -4.415024675 | 0.002004588 | 0.010506709 |
| TMX1            | -4.41519042  | 0.000119056 | 0.001216386 |
| RPL13AP5        | -4.417549581 | 0.03699259  | 0.097614629 |
| EMC3-AS1        | -4.418265895 | 0.011132974 | 0.039646746 |
| SEC61G          | -4.418753583 | 0.017734905 | 0.056430939 |
| PIK3CA          | -4.420578271 | 0.042288426 | 0.107850634 |
| HLA-DMB         | -4.420995077 | 0.005706474 | 0.023743574 |
| KDM4B           | -4.421886878 | 3.91E-05    | 0.000513309 |
| PILRA           | -4.421917317 | 0.026049718 | 0.075612898 |
| TMEM241         | -4.422247078 | 0.01595024  | 0.052098929 |
| CDK11B          | -4.422447114 | 0.000236773 | 0.002061802 |
| EEF1AKMT3       | -4.422463263 | 0.01236751  | 0.043003831 |
| KCNIP3          | -4.422682335 | 0.043916706 | 0.110905031 |
| GNL3            | -4.423352436 | 0.016460531 | 0.053315029 |
| CUL5            | -4.423724324 | 0.000661271 | 0.00449412  |
| CHMP6           | -4.424011729 | 0.016525691 | 0.053454559 |
| MUS81           | -4.424438612 | 0.002679332 | 0.013145779 |
| AZIN2           | -4.425645378 | 0.020448673 | 0.062819983 |
| ENSG00000283427 | -4.42586519  | 0.038566926 | 0.100780241 |
| HSPD1P11        | -4.426013008 | 0.007017896 | 0.027859829 |
| MYNN            | -4.426236998 | 0.000800668 | 0.005196399 |
| FAP             | -4.427031335 | 0.040728394 | 0.104732628 |
| SEPSECS         | -4.428140158 | 0.035839995 | 0.095550785 |
| EEF1B2P3        | -4.428657633 | 0.048562018 | 0.119689406 |
| ALG14           | -4.428699498 | 0.038291857 | 0.100217603 |



|          |              |             |             |
|----------|--------------|-------------|-------------|
| NAA40    | -4.429486699 | 0.000903383 | 0.005701013 |
| HLA-DMB  | -4.42974302  | 0.013511319 | 0.045966059 |
| C12orf29 | -4.429932684 | 0.050331225 | 0.123047696 |
| CIB1     | -4.430173608 | 0.00558998  | 0.023395959 |
| CD37     | -4.430691774 | 0.036400562 | 0.096451928 |
| MARCHF8  | -4.433299648 | 0.015243662 | 0.050442086 |
| WDR25    | -4.434233226 | 0.007613338 | 0.029621295 |
| TMEM102  | -4.434292221 | 0.036562154 | 0.096774178 |
| BCL3     | -4.43493367  | 0.002748258 | 0.013424096 |
| HMGNS    | -4.435281041 | 0.045923606 | 0.114870702 |
| RTN4R    | -4.435579405 | 0.01605549  | 0.052360437 |
| CATIP    | -4.435623707 | 0.022581001 | 0.0677542   |
| TMEM79   | -4.436899478 | 0.03161614  | 0.087268161 |
| LRRC1    | -4.437644725 | 0.021973259 | 0.066292204 |
| ARV1     | -4.437875286 | 0.035847333 | 0.095550785 |
| SLC25A25 | -4.438645779 | 0.00324782  | 0.015308259 |
| TSPAN31  | -4.439392232 | 0.00290774  | 0.014044409 |
| TYRO3    | -4.439910202 | 0.00380728  | 0.017285564 |
| SFXN1    | -4.44177391  | 0.040769871 | 0.104783611 |
| HDGFL3   | -4.443243602 | 3.54E-05    | 0.000478788 |
| DHX35    | -4.444016883 | 0.002054648 | 0.010696542 |
| RAB8A    | -4.444460552 | 0.010265405 | 0.037257112 |
| CNOT6L   | -4.445618207 | 0.035923053 | 0.09563266  |
| CHST4    | -4.445629517 | 0.018307228 | 0.057870573 |
| DSN1     | -4.446112708 | 0.012338322 | 0.042951696 |
| FCHO1    | -4.448280224 | 0.046402547 | 0.115663861 |
| C1orf74  | -4.448670049 | 0.036829226 | 0.097289601 |
| AK6      | -4.449102493 | 0.003871557 | 0.017545994 |
| ZBTB45P1 | -4.449724667 | 0.01005688  | 0.036764868 |
| ZNF785   | -4.449885999 | 0.001677315 | 0.00915339  |
| ZNF331   | -4.450162003 | 0.000877121 | 0.005575981 |
| TUBGCP4  | -4.450590026 | 0.000331762 | 0.002652339 |
| TBL1X    | -4.450687997 | 0.004483886 | 0.019749984 |
| DPEP2    | -4.450743249 | 0.006906357 | 0.027507252 |
| AGBL2    | -4.451005051 | 0.03993133  | 0.103365024 |
| DPCD     | -4.451714798 | 0.015206974 | 0.050359839 |
| GSTK1    | -4.452380475 | 0.000211425 | 0.001885844 |
| DHRS11   | -4.452401788 | 0.001246365 | 0.007333985 |
| DYRK4    | -4.453211675 | 0.006358768 | 0.025775798 |
| CSMD1    | -4.454061066 | 0.038839192 | 0.101273068 |
| CNTNAP3  | -4.455170644 | 0.002671221 | 0.013116614 |
| PTCD2    | -4.455880585 | 0.019116504 | 0.059681755 |
| NOMO1    | -4.456409635 | 0.00198362  | 0.010443554 |
| DCST2    | -4.456620007 | 0.042114087 | 0.107519279 |

|           |              |             |             |
|-----------|--------------|-------------|-------------|
| ZMAT1     | -4.458623389 | 3.68E-05    | 0.000489541 |
| USP35     | -4.459804099 | 0.000265074 | 0.002244302 |
| RNF166    | -4.460122037 | 0.007186455 | 0.028370792 |
| ZNF35     | -4.461972837 | 0.025688311 | 0.074654857 |
| IFT27     | -4.463666086 | 0.004293025 | 0.019103963 |
| RPL3P6    | -4.463752726 | 0.014047602 | 0.047323176 |
| RNF135    | -4.46409262  | 0.001501045 | 0.008437316 |
| TRIM68    | -4.465460087 | 0.007466712 | 0.029172718 |
| CNTFR     | -4.465865659 | 0.03787795  | 0.099365995 |
| HSP90AB2P | -4.466704689 | 0.010677816 | 0.038326521 |
| PTPN1     | -4.467072592 | 0.021485555 | 0.065276394 |
| PHACTR4   | -4.467977737 | 4.70E-06    | 8.80E-05    |
| PROSER2   | -4.469906025 | 0.011202412 | 0.039822023 |
| SALL4     | -4.470183847 | 0.02998995  | 0.084144264 |
| PXDC1     | -4.472987828 | 0.037493274 | 0.098591917 |
| UBALD2    | -4.473027691 | 0.006131733 | 0.025039979 |
| GRK4      | -4.473209314 | 0.0019854   | 0.010448384 |
| LARS2     | -4.473303311 | 0.001237201 | 0.007294241 |
| PPWD1     | -4.473311734 | 3.74E-05    | 0.00049685  |
| UBE3D     | -4.474705603 | 0.008639116 | 0.032585808 |
| TULP3     | -4.475089277 | 0.00266897  | 0.013115526 |
| LEPROT    | -4.476215963 | 0.001042731 | 0.00636471  |
| GLT8D2    | -4.476672859 | 0.039049985 | 0.101647532 |
| CHRD      | -4.476929306 | 0.005329736 | 0.02261168  |
| GEN1      | -4.478776742 | 0.016060749 | 0.052360437 |
| AATF      | -4.478937325 | 0.009910258 | 0.036349627 |
| TRMT61B   | -4.480085815 | 0.019955548 | 0.061681805 |
| COG6      | -4.482083734 | 0.000656571 | 0.004468577 |
| PLCB2     | -4.483210941 | 0.003723497 | 0.017026525 |
| RPS29     | -4.483794034 | 0.00161087  | 0.008874816 |
| CENPP     | -4.483818715 | 0.030018621 | 0.084205189 |
| OTUD4P1   | -4.484514096 | 0.001208571 | 0.007163833 |
| ZSCAN23   | -4.485166191 | 0.00941421  | 0.03491103  |
| TMEM8B    | -4.48551289  | 0.004373305 | 0.01938992  |
| CCDC110   | -4.486082739 | 0.036767054 | 0.097188998 |
| KIAA0753  | -4.48697745  | 0.000803094 | 0.005206564 |
| BBS7      | -4.487024065 | 0.004743322 | 0.020644794 |
| CTIF      | -4.488309221 | 0.000195718 | 0.001770535 |
| TMX3      | -4.48863177  | 0.000177478 | 0.001639845 |
| MED22     | -4.490108083 | 0.009434542 | 0.034943605 |
| STPG3     | -4.490289394 | 0.024189516 | 0.071387839 |
| DDX19A    | -4.493248043 | 0.000147153 | 0.00143611  |
| NPIPB7    | -4.49434458  | 0.023460906 | 0.069714462 |
| SEZ6L2    | -4.494957867 | 0.006632282 | 0.026670147 |

|                 |              |             |             |
|-----------------|--------------|-------------|-------------|
| CEACAM1         | -4.495300534 | 0.036745817 | 0.097154078 |
| APBA3           | -4.495479034 | 0.024748867 | 0.072603074 |
| BID             | -4.496902586 | 0.019003884 | 0.059435179 |
| HMBBOX1         | -4.498690447 | 0.000818715 | 0.005274307 |
| LDHAP4          | -4.500231447 | 0.03616604  | 0.096061828 |
| LYPLAL1         | -4.500946247 | 0.000416839 | 0.003121732 |
| ZNF565          | -4.501619927 | 0.005304915 | 0.022537976 |
| TAS2R19         | -4.502199828 | 0.043897294 | 0.110879142 |
| JAG2            | -4.502236734 | 0.006196561 | 0.025253596 |
| SLC25A15        | -4.502707936 | 0.021817241 | 0.065969493 |
| ENSG00000237115 | -4.503390073 | 0.000868711 | 0.005534148 |
| ZFP37           | -4.506409321 | 0.005719766 | 0.023764564 |
| TP53I3          | -4.507745491 | 8.02E-05    | 0.000908315 |
| RWDD3           | -4.508130836 | 0.009080113 | 0.033911041 |
| SLC9A1          | -4.509396771 | 0.001539777 | 0.00860455  |
| FBXO32          | -4.510258884 | 0.001770484 | 0.009528651 |
| EXOSC4          | -4.510309893 | 0.009548842 | 0.035291354 |
| HNRNPA1P45      | -4.5121705   | 0.040539069 | 0.10440104  |
| ENSG00000259079 | -4.513226466 | 0.043067414 | 0.109353467 |
| ANGPTL4         | -4.513429239 | 0.003850063 | 0.017466701 |
| SYF2            | -4.513564387 | 0.048023768 | 0.118691889 |
| IGHV4-4         | -4.514304694 | 0.042037055 | 0.107390569 |
| C9orf64         | -4.51501456  | 0.018442101 | 0.05817649  |
| CFAP92          | -4.516218699 | 0.002401444 | 0.012115876 |
| MXD4            | -4.51630601  | 0.006018879 | 0.024715577 |
| C18orf25        | -4.516517677 | 0.00187303  | 0.009982895 |
| POM121L14P      | -4.518174701 | 0.028257125 | 0.08051418  |
| SLC7A1          | -4.518719022 | 0.032460669 | 0.088872185 |
| ADPRH           | -4.518943154 | 0.017188075 | 0.055038217 |
| LRP2BP          | -4.519241344 | 0.000621418 | 0.004283764 |
| FAAP20          | -4.520155166 | 0.000784213 | 0.005128099 |
| ZNF660          | -4.520200615 | 1.43E-05    | 0.000227833 |
| RPS9            | -4.520235217 | 0.006757402 | 0.027047485 |
| MSH5            | -4.521244432 | 0.038886888 | 0.101333477 |
| MCRIP2          | -4.521268186 | 0.004380203 | 0.019413393 |
| VPS52           | -4.521960847 | 0.011973339 | 0.041970836 |
| MCM4            | -4.522378542 | 0.000903383 | 0.005701013 |
| VPS26C          | -4.523438477 | 0.012696428 | 0.043920424 |
| TADA2A          | -4.523487223 | 0.033180185 | 0.090331299 |
| FXVD6           | -4.524951093 | 0.00868801  | 0.032714817 |
| COL6A1          | -4.525399096 | 0.039468434 | 0.102460116 |
| KLHL8           | -4.527045206 | 0.000434562 | 0.003219054 |
| FAM227B         | -4.527224878 | 0.000715733 | 0.004765256 |
| SPAG16          | -4.528421629 | 0.008647379 | 0.032606813 |

|                 |              |             |             |
|-----------------|--------------|-------------|-------------|
| PCED1B          | -4.529073551 | 0.010636985 | 0.038238807 |
| STARD4          | -4.52961989  | 0.041577767 | 0.106464415 |
| USPL1           | -4.531287585 | 0.009011059 | 0.033736425 |
| ZNF699          | -4.531332617 | 0.001371413 | 0.007878302 |
| KCNQ5           | -4.531790007 | 0.003018164 | 0.014485272 |
| PNKD            | -4.531837479 | 0.001625736 | 0.008916133 |
| DUS4L           | -4.532058313 | 0.019069145 | 0.059595385 |
| L2HGDH          | -4.532095311 | 0.007357686 | 0.028861093 |
| DPY19L1P1       | -4.53239801  | 0.017638351 | 0.056256813 |
| RNASE1          | -4.533466183 | 0.025545422 | 0.074365481 |
| ARID5A          | -4.533816964 | 0.000428364 | 0.003190717 |
| SWI5            | -4.53568243  | 0.024707804 | 0.072570554 |
| GCSHP3          | -4.538178483 | 0.016279512 | 0.052894282 |
| FASTKD3         | -4.540382262 | 0.011163596 | 0.039725707 |
| RABPK           | -4.540865186 | 0.009255162 | 0.034426698 |
| SKAP2           | -4.543269861 | 0.034111593 | 0.092151948 |
| ABC9            | -4.544748693 | 0.002647815 | 0.013038713 |
| NAP1L4          | -4.545613147 | 0.001762342 | 0.009497501 |
| ZCCHC10         | -4.549562412 | 0.042986856 | 0.109194733 |
| ENSG00000243403 | -4.549706434 | 0.037393555 | 0.098393823 |
| PPP1R2          | -4.551105132 | 0.000873665 | 0.005559855 |
| CKS1B           | -4.551319045 | 0.032036509 | 0.088009522 |
| FCRL5           | -4.552863755 | 0.004816293 | 0.020894769 |
| EED             | -4.552931052 | 0.006015367 | 0.02471487  |
| COX18           | -4.553258634 | 0.003522459 | 0.016316817 |
| R3HCC1L         | -4.553592997 | 0.00281768  | 0.013718904 |
| ZNF439          | -4.554654634 | 0.000292605 | 0.002412987 |
| SPDYA           | -4.555341675 | 0.01170254  | 0.041248557 |
| TRIM27          | -4.555595954 | 0.020098936 | 0.061940999 |
| EVC             | -4.555735622 | 0.000760877 | 0.004991684 |
| RPL17P17        | -4.556744822 | 0.020845526 | 0.063780143 |
| ENSG00000215158 | -4.557472235 | 0.000292118 | 0.002411867 |
| TMEM255B        | -4.557978304 | 0.036655868 | 0.096937433 |
| TMEM147         | -4.559353376 | 0.008908186 | 0.033454757 |
| INO80B-WBP1     | -4.559476253 | 0.017358561 | 0.055496045 |
| TTC39A          | -4.560257805 | 0.009145162 | 0.034122393 |
| EIF1AX          | -4.560686564 | 0.009153888 | 0.03413434  |
| NAA50           | -4.56070734  | 0.003024385 | 0.014503628 |
| PKIA            | -4.561108851 | 0.031997588 | 0.088002455 |
| CATSPER2P1      | -4.561186391 | 0.022252755 | 0.067035178 |
| NR1H2           | -4.561895599 | 0.00018662  | 0.001709954 |
| ZNF324B         | -4.564039657 | 0.026256157 | 0.076047984 |
| MED31           | -4.564708676 | 0.032956212 | 0.089901608 |
| MINPP1          | -4.565729566 | 0.007483957 | 0.029221231 |

|                 |              |             |             |
|-----------------|--------------|-------------|-------------|
| JAZF1           | -4.566107511 | 0.014231677 | 0.04775801  |
| TP53RK          | -4.56632256  | 0.02624981  | 0.076047984 |
| ABHD10          | -4.567549856 | 0.007031689 | 0.027896283 |
| SPHK1           | -4.567851178 | 0.007946696 | 0.030642499 |
| FAXDC2          | -4.568056353 | 0.000612402 | 0.004233304 |
| ODAD4           | -4.568548992 | 0.012663986 | 0.043833253 |
| ABHD12          | -4.569311758 | 0.000392111 | 0.002971916 |
| TRAFD1          | -4.570251742 | 0.001974438 | 0.010417097 |
| CARD19          | -4.57084399  | 0.000293968 | 0.002417244 |
| CCDC107         | -4.571082439 | 0.03157078  | 0.087205095 |
| MANSC1          | -4.571501272 | 0.033445419 | 0.09088984  |
| LRRC37A15P      | -4.57160223  | 0.035925455 | 0.09563266  |
| RCC1L           | -4.572931442 | 0.00018341  | 0.001681817 |
| GSTA4           | -4.572958612 | 0.008120815 | 0.031145228 |
| COQ5            | -4.573158024 | 0.001197185 | 0.007113761 |
| PLA2G4F         | -4.574960031 | 0.02028244  | 0.062404334 |
| SLC39A4         | -4.574971957 | 0.00520732  | 0.022240436 |
| GLOD4           | -4.575600325 | 0.003639162 | 0.016710324 |
| ABR             | -4.576799079 | 0.002267057 | 0.011558744 |
| NDRG4           | -4.576963889 | 0.003297485 | 0.015478474 |
| IFFO2           | -4.577533701 | 0.010184471 | 0.037018869 |
| ZFP28           | -4.578596598 | 0.009021049 | 0.033742516 |
| RABL6           | -4.578854805 | 1.81E-05    | 0.000277786 |
| SERTAD2         | -4.57893393  | 0.001299331 | 0.00756111  |
| ENSG00000263620 | -4.579064964 | 0.008434227 | 0.032050033 |
| C16orf87        | -4.58061414  | 0.03853086  | 0.100707736 |
| TRAPPC2L        | -4.580969718 | 0.028510602 | 0.081026608 |
| NAA35           | -4.581338675 | 0.013684152 | 0.046356836 |
| ANGPT2          | -4.582570885 | 0.000163234 | 0.001542378 |
| LIPH            | -4.582682384 | 0.010414532 | 0.037629101 |
| PGRMC2          | -4.583287248 | 0.002491828 | 0.012468412 |
| MAPK14          | -4.583338193 | 0.000992573 | 0.006132321 |
| ENSG00000277400 | -4.586100865 | 0.043700721 | 0.11047484  |
| UBE2W           | -4.587227532 | 0.020059678 | 0.061876234 |
| NUP160          | -4.587250906 | 0.000336866 | 0.002675478 |
| IMMP2L          | -4.588285454 | 0.001105056 | 0.006654524 |
| PLXNA1          | -4.588988632 | 0.016835737 | 0.054268912 |
| IFT22           | -4.589630319 | 0.001702059 | 0.009249341 |
| LILRB4          | -4.589650904 | 0.038974736 | 0.101517153 |
| ZNF691          | -4.590023333 | 0.015498332 | 0.050976037 |
| POLR3D          | -4.590313023 | 0.002037658 | 0.010625287 |
| RPL10P16        | -4.590871875 | 0.002008669 | 0.010513099 |
| B3GAT1          | -4.590991931 | 0.000389622 | 0.002960446 |
| ZFPL1           | -4.594538613 | 0.019014316 | 0.05943938  |

|                 |              |             |             |
|-----------------|--------------|-------------|-------------|
| TCP11L2         | -4.594790109 | 0.003661814 | 0.016807962 |
| CREBZF          | -4.596537605 | 1.16E-05    | 0.000189988 |
| C1orf131        | -4.59657164  | 0.020670408 | 0.063388554 |
| TTC27           | -4.597766904 | 0.015918691 | 0.052061561 |
| GRIK1           | -4.598897346 | 0.018288879 | 0.057828786 |
| SRM             | -4.599365546 | 0.032426533 | 0.088839012 |
| RPS3AP20        | -4.599391303 | 0.008928301 | 0.033499338 |
| TMEM200A        | -4.599672153 | 0.02568882  | 0.074654857 |
| ZNF57           | -4.600359214 | 0.023261354 | 0.069297423 |
| TIMM9           | -4.600473065 | 0.007632737 | 0.02966816  |
| SCAMP3          | -4.600629086 | 0.000810856 | 0.005237249 |
| ZXDC            | -4.601312467 | 9.39E-05    | 0.00101587  |
| TUBA1C          | -4.603411849 | 0.000100326 | 0.001060674 |
| PRDM5           | -4.60590738  | 0.002311677 | 0.011761468 |
| TBXAS1          | -4.606028244 | 0.029058324 | 0.082090009 |
| DDX39B          | -4.608699025 | 0.000466354 | 0.003403809 |
| STOX1           | -4.608701637 | 0.032767104 | 0.089528899 |
| ZNF251          | -4.608930898 | 0.020793251 | 0.06370071  |
| DHRX            | -4.611132396 | 0.002248668 | 0.01150375  |
| AGGF1           | -4.611807545 | 0.015951638 | 0.052098929 |
| HERC2           | -4.611828867 | 0.007287036 | 0.028655714 |
| ADAMTSL2        | -4.612489235 | 0.000136155 | 0.001350833 |
| UMAD1           | -4.612634622 | 0.015445705 | 0.050834182 |
| YIPF5           | -4.615325547 | 0.003602136 | 0.016584351 |
| SMIM7           | -4.616654765 | 0.005299155 | 0.022528397 |
| COPZ2           | -4.617586731 | 0.032939477 | 0.089878141 |
| ATP8B4          | -4.617959042 | 0.006072554 | 0.024890687 |
| CXorf38         | -4.618365096 | 0.000646981 | 0.00441684  |
| MRPS16          | -4.618534026 | 0.002643592 | 0.013033822 |
| POLDIP2         | -4.619761274 | 0.016575415 | 0.053572448 |
| ELOB            | -4.620398181 | 0.001908065 | 0.010138374 |
| ZNF432          | -4.621361194 | 0.006558928 | 0.026410267 |
| HLA-DRA         | -4.624457963 | 0.003457121 | 0.016069507 |
| CHML            | -4.625174227 | 0.038072892 | 0.099742137 |
| EMP2            | -4.625305087 | 0.021775744 | 0.065893401 |
| IFT57           | -4.626003085 | 0.000242778 | 0.002103497 |
| RAVER2          | -4.626149126 | 0.009230656 | 0.034389177 |
| F11R            | -4.627557586 | 2.75E-05    | 0.000393897 |
| DCP1B           | -4.627833202 | 0.012362088 | 0.043003831 |
| LRRC28          | -4.628213849 | 0.008080311 | 0.031019375 |
| ENSG00000230953 | -4.628419064 | 0.009906406 | 0.036346512 |
| KIF3C           | -4.628684781 | 0.001077757 | 0.006541063 |
| RAB21           | -4.629825693 | 0.002104798 | 0.010906026 |
| ZNF283          | -4.63010662  | 0.006750055 | 0.027035959 |

|          |              |             |             |
|----------|--------------|-------------|-------------|
| TMEM38B  | -4.630545027 | 0.018026712 | 0.057209052 |
| FSCN1P1  | -4.631173606 | 0.001077847 | 0.006541063 |
| NOL9     | -4.631364378 | 0.030063729 | 0.084292653 |
| SLC2A3P4 | -4.631785142 | 0.029061111 | 0.082090009 |
| CFAP221  | -4.632157759 | 0.014436519 | 0.048265794 |
| C14orf93 | -4.634507755 | 0.001413603 | 0.008073283 |
| ATOX1    | -4.634627181 | 0.003361024 | 0.015731567 |
| ATG16L1  | -4.634675764 | 0.000933779 | 0.005850136 |
| SOCS3    | -4.635814201 | 0.000479566 | 0.003478316 |
| RFXANK   | -4.636072048 | 0.002061171 | 0.01072128  |
| PSMB9    | -4.636608472 | 0.016372338 | 0.053127941 |
| ARHGEF25 | -4.636896656 | 0.010164398 | 0.036983573 |
| SLCO2A1  | -4.636992515 | 0.002149951 | 0.011097233 |
| DNALI1   | -4.637238194 | 0.030979396 | 0.086062568 |
| VKORC1   | -4.638207144 | 0.004320506 | 0.019191415 |
| UBE2D1   | -4.639202434 | 0.007798292 | 0.030195306 |
| NAF1     | -4.639289302 | 0.002849197 | 0.013818275 |
| RECQL4   | -4.639644135 | 0.015194156 | 0.050331162 |
| CFAP20   | -4.640729445 | 0.00932676  | 0.034650431 |
| COL21A1  | -4.6413252   | 0.026607342 | 0.076844491 |
| STARD3NL | -4.642410754 | 0.001092309 | 0.006600753 |
| MFAP2    | -4.642720008 | 0.023213435 | 0.069188728 |
| JDP2     | -4.642959573 | 0.02731187  | 0.078455263 |
| ACOT9    | -4.643425049 | 0.003428983 | 0.015987831 |
| EXT2     | -4.646157304 | 0.000742315 | 0.004911109 |
| RHOBTB1  | -4.647132494 | 0.027761193 | 0.079517559 |
| KRT8P3   | -4.647354445 | 0.026076108 | 0.075671352 |
| AP4M1    | -4.650258809 | 6.88E-05    | 0.000808191 |
| PEX16    | -4.650980248 | 0.001111549 | 0.006690299 |
| BTN3A3   | -4.651029475 | 0.004845917 | 0.021000707 |
| TP53     | -4.653314662 | 0.000512431 | 0.003659275 |
| PLEKHO2  | -4.653351546 | 0.02878662  | 0.081599925 |
| DNAJC10  | -4.653584485 | 0.00021023  | 0.001876568 |
| FAM117A  | -4.654436134 | 9.24E-05    | 0.001003427 |
| SUGT1P3  | -4.654496901 | 0.002822919 | 0.013727846 |
| SHC2     | -4.655087678 | 0.013086712 | 0.045013231 |
| TXNRD1   | -4.655567179 | 0.00038672  | 0.002945789 |
| ALOX5    | -4.655655189 | 0.033922491 | 0.091774213 |
| PEA15    | -4.656182746 | 9.77E-05    | 0.001043187 |
| MVB12B   | -4.658020474 | 0.038972664 | 0.101517153 |
| GOLPH3L  | -4.659632023 | 0.00374088  | 0.01706485  |
| OSCP1    | -4.660555215 | 0.012749546 | 0.044051076 |
| FRMD4A   | -4.662230669 | 0.0054143   | 0.022890217 |
| MFSD2A   | -4.66459423  | 0.000813369 | 0.005250677 |

|                 |              |             |             |
|-----------------|--------------|-------------|-------------|
| PTPN7           | -4.666172624 | 0.018511059 | 0.058333211 |
| RNF216          | -4.666653001 | 7.59E-05    | 0.000870441 |
| POLR2F          | -4.66721873  | 0.003589204 | 0.016531098 |
| AFG3L1P         | -4.667456246 | 0.00387189  | 0.017545994 |
| AMN1            | -4.668137773 | 0.003263139 | 0.015356545 |
| ENSG00000255339 | -4.668147069 | 0.008661219 | 0.032638665 |
| PPP1R10         | -4.668194936 | 0.00327529  | 0.015401751 |
| ZNF610          | -4.668323457 | 0.018156946 | 0.057501119 |
| PANX1           | -4.669233803 | 0.013616111 | 0.046178035 |
| N6AMT1          | -4.669345118 | 0.002582716 | 0.012811965 |
| BDH1            | -4.669365709 | 0.001590073 | 0.008796272 |
| GLUD1           | -4.669913453 | 0.03375887  | 0.0914542   |
| PPAN-P2RY11     | -4.670685903 | 0.03048943  | 0.085150913 |
| ZNF789          | -4.671252978 | 0.000194366 | 0.001759615 |
| MTFR1           | -4.671502666 | 0.002947386 | 0.014218876 |
| TMEM243         | -4.672181915 | 0.001569165 | 0.008724473 |
| DHFR            | -4.672318191 | 0.011402657 | 0.040403907 |
| DDX27           | -4.67246626  | 6.58E-06    | 0.000117833 |
| BLCAP           | -4.672783102 | 0.000698839 | 0.0046811   |
| RCAN2           | -4.67316961  | 0.036321125 | 0.096325787 |
| NT5E            | -4.674213715 | 0.001495854 | 0.008417673 |
| ZCCHC17         | -4.674383508 | 0.004343226 | 0.019277746 |
| STEEP1          | -4.675731063 | 9.98E-06    | 0.000167662 |
| SMYD3           | -4.676522793 | 0.001228033 | 0.007254323 |
| GPD1L           | -4.677269347 | 0.00260598  | 0.012900932 |
| ENSG00000261884 | -4.677687275 | 0.001629176 | 0.008924495 |
| ZKSCAN8         | -4.678913486 | 0.000336423 | 0.002675089 |
| DCDC1           | -4.679898198 | 0.013398024 | 0.04573313  |
| TAS2R43         | -4.680744581 | 0.031881524 | 0.087782976 |
| RIPK3           | -4.682202908 | 0.00047727  | 0.003465431 |
| NDOR1           | -4.684934563 | 0.001999392 | 0.010486583 |
| SLC25A42        | -4.685783798 | 0.008077731 | 0.031019306 |
| YAF2            | -4.686042927 | 8.47E-05    | 0.000942384 |
| RABL3           | -4.686439741 | 0.005725753 | 0.023775135 |
| AIFM2           | -4.68684949  | 0.026999165 | 0.077771989 |
| ZMYM4           | -4.687573736 | 0.000202314 | 0.001818666 |
| GPATCH1         | -4.68865492  | 0.003527504 | 0.016333934 |
| FAM53A          | -4.688997246 | 0.001166444 | 0.00697561  |
| CNEP1R1         | -4.689240199 | 0.032036513 | 0.088009522 |
| CDKL1           | -4.689394205 | 0.019979971 | 0.061709001 |
| VAMP7           | -4.689529121 | 0.015275995 | 0.05049171  |
| NSMCE1          | -4.690395823 | 0.02776982  | 0.079518785 |
| UAP1L1          | -4.690971808 | 0.010534754 | 0.037984112 |
| FRMD8           | -4.69178951  | 0.007262308 | 0.028597607 |



|          |              |             |             |
|----------|--------------|-------------|-------------|
| TIMP2    | -4.692676937 | 3.56E-05    | 0.000479237 |
| DDX51    | -4.692944647 | 0.000910954 | 0.005739815 |
| SCAMP4   | -4.692992986 | 5.26E-05    | 0.000651884 |
| ABR      | -4.693607951 | 0.022091807 | 0.066600059 |
| SPRTN    | -4.693686538 | 0.035873243 | 0.095598795 |
| WDR48    | -4.694433234 | 4.36E-05    | 0.000559509 |
| HSPA4    | -4.697597187 | 0.000961768 | 0.005994675 |
| BTF3L4   | -4.69783548  | 0.002238618 | 0.011475209 |
| GBP1P1   | -4.698084671 | 0.018281307 | 0.057819947 |
| HMGAI1P2 | -4.698651236 | 0.048874673 | 0.120191652 |
| ODR4     | -4.698811601 | 0.000292652 | 0.002412987 |
| RAB4A    | -4.699315829 | 0.014116202 | 0.047501391 |
| BPNT2    | -4.699739055 | 0.014567142 | 0.04865361  |
| RCBTB2   | -4.700027694 | 0.000996123 | 0.006142166 |
| MRPL53   | -4.701111805 | 0.008526526 | 0.032291948 |
| PARP3    | -4.702259641 | 0.015083237 | 0.0500322   |
| PIK3IP1  | -4.702786989 | 0.007695857 | 0.029866313 |
| MPDU1    | -4.704601666 | 0.001445963 | 0.008205312 |
| STX10    | -4.705349771 | 0.002646039 | 0.013035267 |
| SRGAP1   | -4.70624037  | 6.62E-05    | 0.000786742 |
| FAM210A  | -4.706418614 | 0.012273511 | 0.042762975 |
| EBP      | -4.708332836 | 0.036854947 | 0.097336305 |
| UBN2     | -4.709100645 | 0.005963121 | 0.024558564 |
| RANGRF   | -4.710134529 | 0.02650723  | 0.076610198 |
| SLC38A6  | -4.711225639 | 0.003296819 | 0.015478474 |
| B4GALT5  | -4.711327543 | 7.10E-05    | 0.000827214 |
| STEAP3   | -4.711903428 | 0.002774373 | 0.013540732 |
| SDR39U1  | -4.713126792 | 0.000132933 | 0.001326477 |
| DNAL1    | -4.713507158 | 0.011096067 | 0.039560174 |
| MMP16    | -4.714179147 | 0.003632996 | 0.016694677 |
| YBX2     | -4.714523556 | 0.028093567 | 0.08016137  |
| TAS2R43  | -4.716798989 | 0.031702517 | 0.087469174 |
| SPAG5    | -4.717744797 | 0.006969832 | 0.027714469 |
| GRB14    | -4.71815561  | 0.023628047 | 0.069993609 |
| GRK3     | -4.718313434 | 0.030538137 | 0.085247604 |
| SWAP70   | -4.718667504 | 0.000230891 | 0.002020754 |
| AIMP2    | -4.718743697 | 0.027179136 | 0.078160197 |
| CCM2     | -4.72009157  | 0.000813996 | 0.005251924 |
| BYSL     | -4.720475029 | 0.030363886 | 0.084910501 |
| ZNF596   | -4.720895007 | 0.000377275 | 0.002890625 |
| NDUFA5   | -4.722175612 | 0.002663746 | 0.013099725 |
| SLC17A5  | -4.722487174 | 0.049499582 | 0.121382281 |
| GABRB3   | -4.724716084 | 0.018955136 | 0.059330998 |
| MTSS2    | -4.725295184 | 0.013220358 | 0.045279914 |

|              |              |             |             |
|--------------|--------------|-------------|-------------|
| SLC39A8      | -4.725373184 | 0.033498086 | 0.090951285 |
| IQSEC1       | -4.725836023 | 0.005300799 | 0.022528397 |
| POU6F1       | -4.727264013 | 0.007147869 | 0.028255325 |
| MRPL23       | -4.727769087 | 0.002837428 | 0.013787328 |
| BTBD9        | -4.728093816 | 0.000507693 | 0.003629721 |
| CYB561       | -4.728339339 | 0.001597369 | 0.008824536 |
| SLC3A1       | -4.728369425 | 0.012575808 | 0.043571169 |
| MORN1        | -4.728380375 | 0.000130436 | 0.001309946 |
| RFC4         | -4.731934042 | 0.006480274 | 0.026154464 |
| DNA2         | -4.732032339 | 0.039745557 | 0.103103349 |
| CD99L2       | -4.732953543 | 0.001396854 | 0.008005455 |
| AAR2         | -4.732994494 | 0.003065076 | 0.014646539 |
| MORN2        | -4.733291134 | 0.014979642 | 0.049756746 |
| NSRP1        | -4.733949793 | 0.000102558 | 0.001079403 |
| CFAP46       | -4.735509104 | 0.01890563  | 0.059221984 |
| SSR3         | -4.735856998 | 9.07E-05    | 0.000993261 |
| SNX16        | -4.736664771 | 0.030617499 | 0.0853707   |
| MEGF8        | -4.737515002 | 0.00629353  | 0.025579881 |
| TVP23C-CDRT4 | -4.737885936 | 0.03555529  | 0.095065438 |
| BAK1P1       | -4.739397722 | 0.020292433 | 0.062409813 |
| METTL15P1    | -4.739605376 | 0.031459851 | 0.087037721 |
| TARBP1       | -4.739776677 | 0.000406063 | 0.003058628 |
| MZT2A        | -4.740169809 | 0.000218122 | 0.001934172 |
| SPDYE7P      | -4.743423636 | 0.019733973 | 0.061183403 |
| SERAC1       | -4.744229669 | 0.000291004 | 0.002404305 |
| TUT1         | -4.744373891 | 0.00024768  | 0.002132236 |
| RAD21        | -4.747607438 | 0.001703216 | 0.009249341 |
| STEAP4       | -4.748193776 | 1.37E-06    | 2.99E-05    |
| DTX1         | -4.749710715 | 0.028581961 | 0.081172234 |
| EBF1         | -4.749713709 | 0.007256277 | 0.028597607 |
| SLC39A3      | -4.750049043 | 0.005563776 | 0.023318541 |
| SLC25A32     | -4.750326277 | 0.00076079  | 0.004991684 |
| PAIP2        | -4.750470473 | 0.000202058 | 0.001818371 |
| HSBP1        | -4.751391285 | 0.002321419 | 0.011796162 |
| TMED1        | -4.751515169 | 0.030133901 | 0.084430726 |
| CASP10       | -4.752143052 | 0.001600906 | 0.008836011 |
| RTKN         | -4.752669974 | 0.000731193 | 0.004846855 |
| PLAU         | -4.752767227 | 0.013465751 | 0.045873753 |
| DNAI7        | -4.752896747 | 0.028250939 | 0.08051418  |
| H2AC8        | -4.753972527 | 0.008569868 | 0.032415527 |
| CYP2A6       | -4.754563746 | 0.047947072 | 0.118608493 |
| NR5A2        | -4.755605389 | 0.027976927 | 0.07988505  |
| ANKRD46      | -4.755988007 | 0.015108493 | 0.050102247 |
| ZNF285       | -4.756610673 | 0.007798032 | 0.030195306 |

|                 |              |             |             |
|-----------------|--------------|-------------|-------------|
| GPD1            | -4.756945799 | 0.018473229 | 0.058259499 |
| FTH1P4          | -4.758315846 | 0.004986686 | 0.021481465 |
| CHMP1A          | -4.758347617 | 0.000809229 | 0.005232323 |
| TBC1D24         | -4.758685783 | 0.00010381  | 0.001088798 |
| CLCN2           | -4.760382669 | 0.000233853 | 0.002042248 |
| FUCA2           | -4.760567223 | 0.027028418 | 0.077837729 |
| AGER            | -4.761251323 | 0.003067412 | 0.014651917 |
| ENDOV           | -4.761900684 | 0.004479559 | 0.019745295 |
| TAGLN2P1        | -4.762834832 | 0.014292852 | 0.047922628 |
| PORCN           | -4.763119089 | 0.00955322  | 0.035296758 |
| DENND1A         | -4.763259769 | 8.44E-05    | 0.000941097 |
| TAF11           | -4.763927406 | 0.035628115 | 0.095168465 |
| NABP1           | -4.765662776 | 0.002497632 | 0.012487127 |
| KHDC1           | -4.765839047 | 0.007844002 | 0.030345374 |
| UGT8            | -4.765841757 | 0.000355312 | 0.002765719 |
| PSPH            | -4.766071163 | 0.01048308  | 0.037854177 |
| AK3             | -4.767605647 | 1.75E-07    | 4.90E-06    |
| FURIN           | -4.768243751 | 1.67E-05    | 0.000259647 |
| RPP38           | -4.768622329 | 0.006059655 | 0.024846228 |
| NDUFA9          | -4.768644789 | 0.003994551 | 0.017989865 |
| RYR3            | -4.770972453 | 0.000307932 | 0.002508727 |
| KPNA5           | -4.7712065   | 0.000144871 | 0.001417553 |
| MGST2           | -4.771959674 | 0.012746335 | 0.044051076 |
| RIOK2           | -4.772177638 | 0.000678014 | 0.004579622 |
| NUDCP1          | -4.773233662 | 0.013301347 | 0.045454406 |
| TMEM54          | -4.773238054 | 0.000597536 | 0.004144743 |
| CRYZ            | -4.773714807 | 0.000203966 | 0.00182974  |
| SLC2A8          | -4.774031506 | 0.025479859 | 0.074225804 |
| EXOSC10         | -4.7743384   | 9.44E-06    | 0.000159978 |
| RASGEF1B        | -4.77568664  | 0.004823222 | 0.020915385 |
| STK4            | -4.775941159 | 1.10E-05    | 0.000181766 |
| MRPL42          | -4.776990377 | 0.025625352 | 0.074559918 |
| SSBP3           | -4.77835415  | 0.005477176 | 0.023097508 |
| NQO2            | -4.779040211 | 0.015388293 | 0.050742451 |
| XPOT            | -4.780578855 | 0.000553609 | 0.003898885 |
| CHST15          | -4.780791745 | 0.000207113 | 0.001855582 |
| ZNF180          | -4.780793988 | 0.046725969 | 0.116300869 |
| ANO8            | -4.781846906 | 0.02464974  | 0.072470354 |
| ENSG00000256664 | -4.782360773 | 0.005729436 | 0.023782269 |
| LSM5            | -4.782439631 | 0.000295572 | 0.002427136 |
| ZNF570          | -4.782583082 | 0.01708572  | 0.054811969 |
| CCDC50          | -4.783277115 | 0.008186793 | 0.031338693 |
| LLPH            | -4.783833246 | 0.00451588  | 0.019847572 |
| VWA1            | -4.784924225 | 0.003543758 | 0.016384128 |

|                 |              |             |             |
|-----------------|--------------|-------------|-------------|
| PIM1            | -4.786025711 | 0.020294533 | 0.062409813 |
| RCN2            | -4.786100273 | 7.06E-05    | 0.000823904 |
| FLOT1           | -4.786622152 | 0.048029814 | 0.118691889 |
| EXT1            | -4.788531694 | 0.002847543 | 0.013818275 |
| WDR89           | -4.78961872  | 0.003911424 | 0.017681986 |
| EIF4BP2         | -4.790159111 | 0.012785955 | 0.044129228 |
| TSPAN32         | -4.790165334 | 0.007685944 | 0.029855798 |
| CYHR1           | -4.790560484 | 0.004973651 | 0.02145441  |
| NDUFV2          | -4.79077362  | 0.00960158  | 0.035442978 |
| MRPL24          | -4.790859811 | 0.001809712 | 0.009683797 |
| HLA-DMA         | -4.791707774 | 0.032033768 | 0.088009522 |
| SLC49A3         | -4.793445181 | 0.019386844 | 0.06038558  |
| CMC1            | -4.793673673 | 0.017382816 | 0.055554048 |
| HSD17B11        | -4.793704828 | 0.009051116 | 0.033834066 |
| PCDHGA9         | -4.793994423 | 8.58E-05    | 0.000951709 |
| FOSL1           | -4.797467602 | 0.005013478 | 0.021564726 |
| ATP5MKP1        | -4.797756966 | 0.012711179 | 0.043958889 |
| HNMT            | -4.79791504  | 0.002205679 | 0.011346169 |
| GFPT2           | -4.800396052 | 0.0160224   | 0.052273619 |
| TJP3            | -4.801682845 | 0.000573969 | 0.004015794 |
| COMMD5          | -4.803267034 | 0.012560542 | 0.043537459 |
| P3H1            | -4.804486557 | 0.001915537 | 0.01016469  |
| JOSD2           | -4.804586509 | 0.015014409 | 0.049838296 |
| DGAT1           | -4.804676185 | 0.00031539  | 0.002557598 |
| RASA2           | -4.80490204  | 0.016380823 | 0.053127941 |
| SRBD1           | -4.805270509 | 0.004588954 | 0.020088498 |
| ENSG00000258130 | -4.807163169 | 0.002070862 | 0.01074859  |
| LPXN            | -4.80864398  | 0.006789673 | 0.027140754 |
| RPA3            | -4.808780952 | 0.027870124 | 0.079711715 |
| UBE2Z           | -4.809101606 | 2.57E-05    | 0.000372677 |
| BHLHE40         | -4.809227409 | 0.009748682 | 0.035898403 |
| GUCY1A1         | -4.809261232 | 7.69E-05    | 0.000880955 |
| ZNF821          | -4.809407901 | 0.005610461 | 0.023449249 |
| SLC16A6P1       | -4.80981512  | 0.012342503 | 0.042953897 |
| MCOLN3          | -4.81050196  | 0.025394188 | 0.074029685 |
| CHAD            | -4.811331553 | 0.001773663 | 0.009541517 |
| IFFO1           | -4.811378952 | 0.004929281 | 0.021308579 |
| DNAI4           | -4.812077476 | 0.000889324 | 0.005636997 |
| REX1BD          | -4.812588058 | 0.000111996 | 0.00115567  |
| SDHAP3          | -4.813317471 | 0.004096192 | 0.018335912 |
| GBGT1           | -4.813855328 | 0.003720974 | 0.017026525 |
| MSRB2           | -4.814132324 | 0.047560007 | 0.117916084 |
| KIF20B          | -4.814403117 | 0.002062328 | 0.010722688 |
| UBE3C           | -4.814899284 | 3.11E-05    | 0.000432671 |

|                 |              |             |             |
|-----------------|--------------|-------------|-------------|
| ZNF205          | -4.816114977 | 0.008995302 | 0.033698278 |
| TRIM39          | -4.816704894 | 0.012459413 | 0.043261254 |
| WDR12           | -4.817147442 | 0.005467792 | 0.023084113 |
| MAF1            | -4.817517116 | 0.001878962 | 0.010010103 |
| VKORC1L1        | -4.817712115 | 0.026467263 | 0.076512957 |
| C12orf57        | -4.818153693 | 0.025148985 | 0.07352737  |
| ITIH4           | -4.823137056 | 0.001271646 | 0.007442944 |
| INSIG2          | -4.823392856 | 0.011760798 | 0.041393633 |
| EIF4HP1         | -4.823430807 | 0.045975702 | 0.114937642 |
| CD36            | -4.823732587 | 0.000432063 | 0.003206431 |
| TSPAN6          | -4.825741753 | 0.033959773 | 0.091834024 |
| MARK2           | -4.826083086 | 0.000950123 | 0.005938642 |
| UPRT            | -4.827109099 | 0.008393219 | 0.03194702  |
| RRM2            | -4.827547007 | 0.025183017 | 0.0735829   |
| SLC25A17        | -4.827845066 | 0.00642767  | 0.026002846 |
| SNX18           | -4.829490662 | 0.001305747 | 0.007587502 |
| ZNF721          | -4.829505312 | 0.008591021 | 0.03247524  |
| FAM185A         | -4.830653233 | 0.000643876 | 0.004403096 |
| PPP2R3B         | -4.831050943 | 0.002544688 | 0.012644048 |
| KLC2            | -4.831855712 | 0.002522409 | 0.01256947  |
| HSH2D           | -4.83215731  | 0.002532649 | 0.012606845 |
| MAP3K1          | -4.834053947 | 0.021504318 | 0.065308976 |
| KLF13           | -4.834301595 | 0.006505682 | 0.02623077  |
| REEP3           | -4.834386542 | 0.011849326 | 0.04163258  |
| RAP1GAP2        | -4.834942793 | 0.001358078 | 0.007820253 |
| ENSG00000219201 | -4.835433808 | 0.043391298 | 0.110009644 |
| ERCC2           | -4.835499971 | 0.00473578  | 0.020619381 |
| ISG20           | -4.837038103 | 0.022711892 | 0.068062576 |
| SLC9A7P1        | -4.837305264 | 0.000723228 | 0.004807224 |
| HIKESHI         | -4.837725646 | 0.016472813 | 0.053326271 |
| NSUN5P2         | -4.837838187 | 0.001395539 | 0.008001708 |
| NHEJ1           | -4.83798544  | 0.017385883 | 0.055554048 |
| MACIR           | -4.838422934 | 0.046054131 | 0.115078284 |
| MECOM           | -4.839462438 | 0.006200212 | 0.025259969 |
| LZTFL1          | -4.839922176 | 0.006250381 | 0.025438671 |
| THOC1           | -4.84026886  | 0.004070645 | 0.018241795 |
| RPS11P5         | -4.840389835 | 0.029712216 | 0.083481119 |
| PMF1-BGLAP      | -4.84050988  | 0.017805788 | 0.05659697  |
| EEF1A1          | -4.840519574 | 7.95E-05    | 0.00090428  |
| TIAM2           | -4.840608667 | 0.002533034 | 0.012606845 |
| LBH             | -4.840629393 | 0.003370426 | 0.015763385 |
| MCOLN2          | -4.840683307 | 0.043893253 | 0.110879142 |
| KLHL5           | -4.842358024 | 0.013199479 | 0.04525743  |
| TXNL4A          | -4.842864376 | 0.000322176 | 0.002598617 |

|            |              |             |             |
|------------|--------------|-------------|-------------|
| HSF2       | -4.843255491 | 0.044289981 | 0.11161481  |
| LTN1       | -4.843624432 | 0.001195867 | 0.007109415 |
| UNC13B     | -4.843940677 | 4.13E-05    | 0.000536661 |
| TAP2       | -4.844881446 | 0.000423093 | 0.00315996  |
| POC5       | -4.845396514 | 0.007564705 | 0.029507957 |
| ZNF562     | -4.845905551 | 0.000141312 | 0.001390604 |
| DNHD1      | -4.84601322  | 5.87E-06    | 0.000106984 |
| PSMC3IP    | -4.846497782 | 0.025467149 | 0.074206638 |
| VSIR       | -4.846554084 | 2.86E-05    | 0.000406028 |
| SLC25A24   | -4.847000354 | 0.000320865 | 0.002592622 |
| MAMDC4     | -4.84825644  | 0.000121174 | 0.001234589 |
| FAM53C     | -4.849071645 | 2.32E-06    | 4.72E-05    |
| SLC35B2    | -4.84996285  | 8.08E-05    | 0.000911812 |
| TSHZ2      | -4.850945904 | 0.00067461  | 0.004564268 |
| BLMH       | -4.851157808 | 0.000347372 | 0.002731085 |
| BRCA2      | -4.851878076 | 0.012967276 | 0.044665882 |
| LRRC75B    | -4.852103322 | 0.010091619 | 0.036812797 |
| EVA1C      | -4.852125427 | 0.026733189 | 0.07713433  |
| KIAA1143P1 | -4.852820445 | 0.006012394 | 0.024714715 |
| RPL17P25   | -4.852958347 | 0.010728275 | 0.038452781 |
| NDUFB5     | -4.853024597 | 0.000273711 | 0.002295908 |
| TMEM126B   | -4.853106623 | 0.004940899 | 0.021335939 |
| RPF2       | -4.853351366 | 0.028739025 | 0.081502385 |
| RUNX1T1    | -4.853813155 | 0.002209171 | 0.011354484 |
| ADAP2      | -4.854779817 | 0.003814007 | 0.017309613 |
| RHOG       | -4.856276519 | 0.001679047 | 0.009158712 |
| NEMP2      | -4.856445641 | 0.01156676  | 0.040841326 |
| MRPS7      | -4.856933231 | 0.024728861 | 0.072580512 |
| SMC5       | -4.859742893 | 0.031096502 | 0.086209817 |
| IQCB1      | -4.860035841 | 0.003939268 | 0.01779138  |
| SCLY       | -4.86017985  | 0.010642739 | 0.038239711 |
| ATXN7L1    | -4.860582093 | 0.0067487   | 0.027035959 |
| SMIM15     | -4.863071424 | 0.043256552 | 0.109741628 |
| GPR161     | -4.863514753 | 0.002034747 | 0.010615764 |
| ELMO3      | -4.863744966 | 0.002626681 | 0.012961007 |
| RHOQ       | -4.86611126  | 0.011593065 | 0.040910338 |
| SUMO2P8    | -4.866274244 | 0.043254806 | 0.109741628 |
| CLK2       | -4.866351914 | 5.39E-05    | 0.000664875 |
| NFATC2IP   | -4.866570061 | 0.000475145 | 0.003456223 |
| RUVBL1     | -4.867975592 | 4.94E-05    | 0.000617407 |
| USP42      | -4.868467323 | 0.000350477 | 0.002743968 |
| RDH10      | -4.868556461 | 0.017864504 | 0.056741677 |
| THRB       | -4.869234897 | 0.027300454 | 0.078453156 |
| ESS2       | -4.869263958 | 0.001043406 | 0.00636562  |

|           |              |             |             |
|-----------|--------------|-------------|-------------|
| PPAT      | -4.869646031 | 0.012682662 | 0.043885346 |
| DBP       | -4.86975575  | 0.001342585 | 0.007756381 |
| SNRPE     | -4.869857182 | 0.022033278 | 0.066456715 |
| HMCN1     | -4.870602539 | 0.043588933 | 0.110331944 |
| RORC      | -4.870917708 | 0.00975212  | 0.035900138 |
| RNF215    | -4.871188634 | 0.000596599 | 0.004140614 |
| SCML1     | -4.87147631  | 0.01124944  | 0.039965724 |
| RHNO1     | -4.871710975 | 0.001284575 | 0.007489644 |
| RPL36AP16 | -4.872137398 | 0.011133451 | 0.039646746 |
| ADAP1     | -4.872345829 | 0.00104967  | 0.006390951 |
| IRAG1     | -4.873317766 | 2.74E-05    | 0.000393073 |
| DENND2D   | -4.874141071 | 0.000791679 | 0.005160192 |
| BHMT2     | -4.87415564  | 0.013299186 | 0.045454406 |
| TXNDC17   | -4.874777431 | 0.015389585 | 0.050742451 |
| TOM1      | -4.875464772 | 0.00042319  | 0.00315996  |
| CMTM6     | -4.875749038 | 0.002135761 | 0.011041933 |
| TMEM30B   | -4.875895284 | 3.13E-05    | 0.000436021 |
| LRRC57    | -4.875896311 | 0.000286456 | 0.002376468 |
| POU5F1P3  | -4.876806333 | 0.043943593 | 0.110949781 |
| C6orf120  | -4.877727399 | 0.010661855 | 0.038294092 |
| SCO1      | -4.87789461  | 0.002586208 | 0.012824034 |
| HLA-DRB1  | -4.879148444 | 0.014976663 | 0.049756746 |
| PDE4A     | -4.88065187  | 0.000537883 | 0.003814022 |
| FAM107B   | -4.88069771  | 0.00604043  | 0.024784191 |
| DCUN1D3   | -4.880797731 | 0.000283966 | 0.002360661 |
| TAS2R15P  | -4.881841429 | 0.001944271 | 0.010281111 |
| MDK       | -4.882538388 | 0.028415964 | 0.080833567 |
| JAK2      | -4.884555015 | 0.003093433 | 0.01474711  |
| HSPA7     | -4.88546369  | 0.000799641 | 0.00519252  |
| VOPP1     | -4.885514004 | 0.004057532 | 0.018216754 |
| DCLRE1A   | -4.88592526  | 0.001209737 | 0.007167234 |
| TRAF7     | -4.886083695 | 0.000153207 | 0.001481162 |
| EMC7      | -4.886147225 | 0.010634527 | 0.038238807 |
| CYBRD1    | -4.887007663 | 0.000293667 | 0.002416415 |
| PAK4      | -4.887115538 | 8.55E-05    | 0.000949284 |
| ZBTB22    | -4.888152767 | 0.024171631 | 0.07135937  |
| CYCS      | -4.888986233 | 0.015244312 | 0.050442086 |
| ZBTB47    | -4.88910918  | 0.012524873 | 0.043438701 |
| SNAP23    | -4.889996418 | 0.000160664 | 0.001524042 |
| CHERP     | -4.890361544 | 0.00056048  | 0.003935256 |
| HLA-H     | -4.890980765 | 0.047630476 | 0.118066615 |
| CBX1      | -4.892365445 | 0.001924024 | 0.010196316 |
| MICA      | -4.892871825 | 0.008140803 | 0.031204378 |
| CYB5D1    | -4.893504066 | 0.006469514 | 0.026137181 |

|          |              |             |             |
|----------|--------------|-------------|-------------|
| PAK3     | -4.893789365 | 0.049396274 | 0.121202615 |
| ERI1     | -4.894841709 | 0.006947558 | 0.027644064 |
| C2CD2L   | -4.894996819 | 0.010338373 | 0.037438876 |
| ASNSD1   | -4.896042285 | 0.01791071  | 0.056870733 |
| PSTPIP1  | -4.896548582 | 0.007516495 | 0.029338811 |
| SPACA9   | -4.89793433  | 0.01459404  | 0.048730003 |
| DNASE2   | -4.89856444  | 0.012336459 | 0.042951696 |
| ZNF765   | -4.899881314 | 0.012396031 | 0.043090627 |
| SIRT2    | -4.900422228 | 9.53E-05    | 0.001024154 |
| CEP76    | -4.901657698 | 0.010792318 | 0.038647992 |
| GATA6    | -4.903437358 | 0.013703709 | 0.0464101   |
| TDRD3    | -4.90353433  | 1.08E-05    | 0.000179246 |
| PHETA1   | -4.90365092  | 0.000440342 | 0.003253908 |
| TGFB1    | -4.903796412 | 0.01096649  | 0.039178983 |
| LEPROTL1 | -4.904063612 | 0.00282031  | 0.013720671 |
| EPHA1    | -4.90587666  | 0.010893777 | 0.038976731 |
| MFSD6    | -4.906167624 | 7.57E-05    | 0.000870441 |
| FAM131A  | -4.907134122 | 0.001078108 | 0.006541063 |
| SMYD2    | -4.908409861 | 0.010158097 | 0.03697988  |
| SGCB     | -4.908504666 | 0.004608011 | 0.02015006  |
| CCNK     | -4.908784677 | 9.74E-06    | 0.000163904 |
| TSSC4    | -4.909154034 | 0.004939434 | 0.021335939 |
| ANKH     | -4.909361315 | 2.76E-05    | 0.00039451  |
| RPS6KA5  | -4.90955411  | 0.002866174 | 0.013887977 |
| LIPA     | -4.909934401 | 8.46E-05    | 0.000941619 |
| FERMT3   | -4.910284007 | 0.013081554 | 0.045008281 |
| SIN3A    | -4.910464626 | 8.51E-07    | 1.98E-05    |
| C21orf62 | -4.911284608 | 0.04259081  | 0.108416227 |
| NAPSA    | -4.911395661 | 0.041347533 | 0.105986983 |
| BCL2L2   | -4.91268148  | 0.044997268 | 0.112997289 |
| INSYN2A  | -4.913838605 | 0.006805054 | 0.027193258 |
| SLC7A8   | -4.913869908 | 0.001289687 | 0.007515826 |
| LINS1    | -4.914798567 | 4.20E-05    | 0.000543147 |
| SLC25A22 | -4.916143991 | 0.003218239 | 0.015206009 |
| ATAT1    | -4.916995619 | 0.000604821 | 0.004188077 |
| SEPTIN6  | -4.917358944 | 0.001097007 | 0.00661923  |
| CKAP2    | -4.917808992 | 0.002540769 | 0.012629759 |
| PHYHIP   | -4.917974321 | 0.008498928 | 0.032248097 |
| CCDC146  | -4.918884892 | 0.001444014 | 0.008198101 |
| TAB1     | -4.919244756 | 0.011294435 | 0.040102037 |
| ASF1A    | -4.920130067 | 0.011467    | 0.040588259 |
| MRPL15   | -4.921338055 | 0.022407993 | 0.067452461 |
| ZNF517   | -4.921340009 | 0.002644908 | 0.013035002 |
| SCN1B    | -4.921353236 | 0.020472807 | 0.062878166 |



|           |              |             |             |
|-----------|--------------|-------------|-------------|
| NFYB      | -4.921359865 | 0.002188357 | 0.011271437 |
| ZNF516    | -4.921447037 | 0.000282646 | 0.002351302 |
| PGAP2     | -4.921824571 | 0.002361355 | 0.011968946 |
| ZNF404    | -4.921877535 | 0.005976423 | 0.024604975 |
| EPHB1     | -4.92265291  | 0.023616258 | 0.069984025 |
| PIK3CD    | -4.922849079 | 0.021332033 | 0.064858812 |
| AGBL5     | -4.924553197 | 0.000351081 | 0.002746923 |
| ZNF776    | -4.926095689 | 0.01576576  | 0.051729128 |
| PPARGC1A  | -4.92694112  | 0.000187456 | 0.001713721 |
| DAZAP2    | -4.927477331 | 2.85E-05    | 0.000403853 |
| ODF3B     | -4.928908705 | 0.000111423 | 0.001150742 |
| CCL14     | -4.929586357 | 0.041393177 | 0.106059062 |
| ZNF614    | -4.93007382  | 0.004502684 | 0.019796763 |
| LIN37     | -4.930722406 | 0.042784064 | 0.108770912 |
| SERINC5   | -4.931358146 | 0.001600344 | 0.008836011 |
| CCDC189   | -4.931431979 | 0.011185472 | 0.039773489 |
| IFI44L    | -4.931630556 | 0.008803556 | 0.033092622 |
| CREB1     | -4.93278329  | 0.000274939 | 0.002301426 |
| POP5      | -4.93344202  | 0.012756033 | 0.044051076 |
| EAPP      | -4.934564782 | 0.023459764 | 0.069714462 |
| FAM98A    | -4.934778881 | 0.001014712 | 0.006240893 |
| BCAS2P2   | -4.935802256 | 0.002614731 | 0.012919084 |
| SEC14L2   | -4.936179718 | 2.66E-05    | 0.000383262 |
| ZNRD2     | -4.936781006 | 0.009578793 | 0.035380443 |
| RPL22     | -4.937323144 | 0.000699621 | 0.004683747 |
| RPL23AP18 | -4.937434314 | 0.045324374 | 0.11367721  |
| N4BP2L1   | -4.937697248 | 0.000246705 | 0.002126864 |
| GAB2      | -4.937739342 | 0.000622988 | 0.004291775 |
| METTL25B  | -4.938250071 | 0.000138752 | 0.001372104 |
| ZNF174    | -4.938880682 | 0.040135105 | 0.103687208 |
| TRIM47    | -4.939460403 | 0.022200495 | 0.066911054 |
| RNASEH2C  | -4.939483633 | 0.039788838 | 0.103127378 |
| CCDC150   | -4.939785371 | 0.00119913  | 0.007118241 |
| FSD1L     | -4.940646459 | 0.012093216 | 0.042244239 |
| STX2      | -4.941482781 | 0.030581309 | 0.08532876  |
| SLC30A7   | -4.942116252 | 0.001585254 | 0.008785676 |
| PIK3R2    | -4.945446158 | 0.028401529 | 0.080830129 |
| PLA2G15   | -4.946565284 | 0.005797947 | 0.024017233 |
| RPSAP9    | -4.946603495 | 0.003908969 | 0.017680929 |
| FOXO4     | -4.946648766 | 0.000153825 | 0.001483582 |
| PGAM5     | -4.946993975 | 0.02167298  | 0.065713864 |
| RHEB      | -4.947242307 | 0.000806839 | 0.005219656 |
| PA2G4     | -4.947661511 | 0.00626226  | 0.02547845  |
| KARS1     | -4.949848315 | 0.00093005  | 0.005838437 |

|            |              |             |             |
|------------|--------------|-------------|-------------|
| PPT2-EGFL8 | -4.950839966 | 0.010406294 | 0.037614533 |
| DHRS7      | -4.950926808 | 1.69E-05    | 0.000262173 |
| PRDM11     | -4.951392886 | 0.001792076 | 0.009606418 |
| CCDC157    | -4.951904931 | 0.000955602 | 0.00596832  |
| EDNRA      | -4.952080591 | 0.001572929 | 0.008733361 |
| PGLS       | -4.952182491 | 0.003483711 | 0.016162067 |
| TIMM17A    | -4.953430644 | 2.71E-05    | 0.000390522 |
| RAD51B     | -4.953530523 | 0.000726904 | 0.004829007 |
| PLEKHG3    | -4.95379313  | 0.004439198 | 0.019603085 |
| CUEDC2     | -4.954069552 | 0.000343183 | 0.002709646 |
| IRF4       | -4.954660815 | 0.008931684 | 0.033501427 |
| LDHAP2     | -4.955056985 | 0.007941455 | 0.030632051 |
| LDB2       | -4.956658019 | 0.000583421 | 0.004067813 |
| SLC2A9     | -4.957120282 | 0.024783613 | 0.072652179 |
| BLOC1S1    | -4.957445032 | 0.021709204 | 0.065765563 |
| PTTG1      | -4.957890124 | 0.001123821 | 0.006750733 |
| FAM118B    | -4.958803197 | 0.000332874 | 0.002657677 |
| PRR4       | -4.959487965 | 0.022969758 | 0.0686145   |
| AVL9       | -4.95973673  | 1.67E-05    | 0.000259338 |
| BIRC7      | -4.959894964 | 0.026838548 | 0.077364561 |
| ARL6IP1    | -4.960189044 | 9.48E-05    | 0.001020164 |
| PKN3       | -4.960314676 | 0.026453759 | 0.076492189 |
| CACNA1D    | -4.960914113 | 9.44E-05    | 0.001016584 |
| TNFRSF10A  | -4.96192699  | 0.02150707  | 0.065308976 |
| FAAP100    | -4.961945125 | 0.000132475 | 0.001323003 |
| SVEP1      | -4.962244174 | 0.014186616 | 0.04768531  |
| CASP7      | -4.962348576 | 0.020490951 | 0.062917928 |
| ALAS1      | -4.963402777 | 0.000317849 | 0.002573411 |
| TMCO3      | -4.963854658 | 0.000101768 | 0.001073091 |
| MUC4       | -4.964139394 | 0.009018006 | 0.033742516 |
| GRPEL1     | -4.965123324 | 0.018311657 | 0.057870573 |
| PITPNM3    | -4.965610358 | 0.006039314 | 0.024784191 |
| CNNM4      | -4.965969835 | 0.021282734 | 0.064790296 |
| CIAPIN1    | -4.968298428 | 0.006393909 | 0.025900895 |
| SMPD2      | -4.968615719 | 0.040813416 | 0.104849823 |
| BOP1       | -4.969149918 | 0.000925077 | 0.00581367  |
| DNAJC15    | -4.970185753 | 0.009264596 | 0.034451204 |
| ALKBH8     | -4.971892194 | 0.01039713  | 0.0375999   |
| ACY1       | -4.972124354 | 0.000273962 | 0.002296425 |
| ZNF767P    | -4.972636149 | 0.000169564 | 0.00158978  |
| PDE1C      | -4.973034007 | 0.029521352 | 0.08309808  |
| ETV6       | -4.973514829 | 0.005110764 | 0.02187436  |
| XYLB       | -4.976285533 | 0.030902536 | 0.085927932 |
| CCDC61     | -4.976668926 | 0.004958162 | 0.021402851 |

|                 |              |             |             |
|-----------------|--------------|-------------|-------------|
| TMEM214         | -4.977533815 | 0.001052192 | 0.006403083 |
| HINT1           | -4.978851879 | 0.042445186 | 0.108136504 |
| TGIF2           | -4.979108887 | 0.000621471 | 0.004283764 |
| IGLV3-25        | -4.979178022 | 0.039916271 | 0.103365024 |
| ESRRG           | -4.980013358 | 0.00249561  | 0.012482175 |
| KAT2B           | -4.98002666  | 0.000961803 | 0.005994675 |
| UTP11           | -4.980451099 | 0.013114741 | 0.045071215 |
| ACTG1P14        | -4.980762418 | 0.011116569 | 0.039621599 |
| ERO1B           | -4.981053177 | 0.004988797 | 0.021481465 |
| FAT2            | -4.981171076 | 0.044688653 | 0.112362164 |
| APLF            | -4.981907209 | 0.00031824  | 0.002574847 |
| ZNF859P         | -4.982701089 | 0.041291134 | 0.105887263 |
| OSBPL6          | -4.983395393 | 0.006289589 | 0.025572449 |
| SLC25A10        | -4.98373132  | 0.023475777 | 0.069714462 |
| MSH5            | -4.984636696 | 0.020590215 | 0.06319066  |
| ZHX2            | -4.984835075 | 0.022900999 | 0.068476702 |
| PCDH9           | -4.98557508  | 0.000138711 | 0.001372104 |
| ACSL5           | -4.985928163 | 0.001252412 | 0.007362408 |
| ZNF706          | -4.986655575 | 0.000344857 | 0.002719318 |
| COG5            | -4.98675913  | 0.023846229 | 0.070484678 |
| TCEA3           | -4.986820219 | 0.030601197 | 0.085363111 |
| GNE             | -4.986934211 | 0.00288319  | 0.013948094 |
| SMIM14          | -4.987213478 | 2.96E-06    | 5.86E-05    |
| MYOM1           | -4.988773194 | 0.020980779 | 0.064080583 |
| PRPSAP1         | -4.989613344 | 0.000295874 | 0.002427971 |
| KSR2            | -4.990777838 | 0.00408136  | 0.018283042 |
| DTNB            | -4.992034087 | 0.00431824  | 0.019191415 |
| ACAT1           | -4.992721464 | 0.000179818 | 0.001657672 |
| CYP2E1          | -4.993445807 | 0.004045118 | 0.018167757 |
| PRDM4           | -4.994650608 | 0.000155167 | 0.001490585 |
| ENSG00000269069 | -4.996715398 | 0.000449743 | 0.003308543 |
| SGMS2           | -4.996850467 | 0.000112536 | 0.001160252 |
| KCNJ13          | -4.997242835 | 0.027284353 | 0.078425505 |
| LZTR1           | -4.998143629 | 0.000169382 | 0.001589303 |
| CMAS            | -4.999032863 | 0.003037245 | 0.014542253 |
| TAS2R30         | -4.99904919  | 0.006992431 | 0.027786073 |
| RPS6KA1         | -4.99969007  | 6.23E-06    | 0.000112791 |
| NNMT            | -5.000014222 | 0.022766295 | 0.068162488 |
| INTU            | -5.000017849 | 0.000105484 | 0.001100669 |
| HAUS4           | -5.000255036 | 0.020915307 | 0.06392901  |
| PTDSS2          | -5.001333037 | 0.039048388 | 0.101647532 |
| KCTD5           | -5.001454486 | 0.0249329   | 0.073036743 |
| CTDSPL          | -5.001499411 | 0.000566645 | 0.003971433 |
| MS4A14          | -5.001566206 | 0.021141419 | 0.064473603 |

|              |              |             |             |
|--------------|--------------|-------------|-------------|
| ADGRB3       | -5.002632848 | 0.019596112 | 0.060818293 |
| TRDMT1       | -5.002682453 | 0.000337564 | 0.002679263 |
| FHIT         | -5.003014981 | 0.015125196 | 0.05014053  |
| PCGF1        | -5.003311786 | 0.026941572 | 0.077624564 |
| NUDC         | -5.003413781 | 0.010524572 | 0.037958708 |
| TRIM39       | -5.006772467 | 0.010571588 | 0.0380878   |
| LSS          | -5.007926726 | 0.000444906 | 0.003283621 |
| ITM2A        | -5.010054681 | 0.002448529 | 0.012297509 |
| WNK4         | -5.010237347 | 0.004894664 | 0.021196785 |
| TSPAN18      | -5.0107972   | 8.31E-05    | 0.000931315 |
| WRNIP1       | -5.011391374 | 8.25E-05    | 0.000926388 |
| FAM221A      | -5.013862898 | 2.00E-06    | 4.18E-05    |
| TMED7-TICAM2 | -5.01448852  | 0.006374833 | 0.025832265 |
| GNPNAT1      | -5.014573198 | 0.00147043  | 0.008312975 |
| IMPDH1P5     | -5.014589276 | 0.01050315  | 0.037904034 |
| ESR2         | -5.016215657 | 0.000540578 | 0.003826409 |
| NFE2L3P1     | -5.016495258 | 0.001462753 | 0.008273438 |
| ZNHIT3       | -5.017501272 | 0.018440322 | 0.05817649  |
| CBWD1        | -5.017821834 | 0.000188231 | 0.001718213 |
| MSR1         | -5.018253065 | 0.041504444 | 0.10629915  |
| AGTRAP       | -5.019638749 | 9.22E-05    | 0.001003427 |
| FIBP         | -5.020392945 | 9.34E-05    | 0.001013392 |
| ZNF654       | -5.020480914 | 0.009059207 | 0.033853858 |
| CCDC66       | -5.02148336  | 6.75E-05    | 0.000797729 |
| LRRC49       | -5.021602848 | 0.000575612 | 0.004020314 |
| SELENOW      | -5.02185768  | 3.70E-06    | 7.10E-05    |
| NAIP         | -5.021941642 | 0.01153344  | 0.040759346 |
| FCGR1B       | -5.022403604 | 0.040774191 | 0.104783611 |
| FBXW7        | -5.02308871  | 8.88E-06    | 0.000152364 |
| MCC          | -5.02334216  | 0.000329041 | 0.002635813 |
| ADARB1       | -5.025705779 | 0.000491115 | 0.003542584 |
| G2E3         | -5.026337316 | 0.00210885  | 0.010922344 |
| ARHGEF6      | -5.027473924 | 0.002170731 | 0.01119494  |
| UVSSA        | -5.02802177  | 4.93E-05    | 0.000616757 |
| PER2         | -5.028402995 | 0.000193117 | 0.001753824 |
| CD83         | -5.028708767 | 0.037555275 | 0.098690632 |
| HSD17B7P2    | -5.028963699 | 0.023804572 | 0.070378735 |
| DNAAF9       | -5.030129085 | 0.012419493 | 0.04315979  |
| IRF6         | -5.030288885 | 0.000393309 | 0.002979105 |
| PES1         | -5.032387666 | 0.001189982 | 0.007081387 |
| TEFM         | -5.034579922 | 0.011633869 | 0.041042364 |
| CEP44        | -5.035412128 | 0.000853798 | 0.005451339 |
| THYN1        | -5.036695566 | 0.004535549 | 0.01988348  |
| MFSD13A      | -5.037631751 | 0.00157139  | 0.008728824 |

|                 |              |             |             |
|-----------------|--------------|-------------|-------------|
| MAP3K10         | -5.038708421 | 0.004254858 | 0.018955025 |
| KCNN3           | -5.039306708 | 0.019568476 | 0.060748096 |
| PFDN5           | -5.04049655  | 7.04E-05    | 0.000822139 |
| NSMCE4A         | -5.041416244 | 0.003422743 | 0.01597104  |
| SPCS3           | -5.041648413 | 0.000547059 | 0.003865501 |
| ZNF23           | -5.04271126  | 0.000821704 | 0.005284756 |
| RPSAP36         | -5.043040945 | 0.011531309 | 0.040759346 |
| ENSG00000231181 | -5.043763107 | 0.019279275 | 0.060112403 |
| TMEM69          | -5.043837444 | 7.56E-05    | 0.000869807 |
| ZBTB12BP        | -5.044319277 | 7.49E-06    | 0.000131341 |
| SCYL1           | -5.044443585 | 2.19E-06    | 4.51E-05    |
| GGCT            | -5.044514477 | 8.80E-05    | 0.000971336 |
| RELN            | -5.044842523 | 0.00027454  | 0.002299675 |
| PPM1M           | -5.045019695 | 0.001224374 | 0.007237894 |
| ZNF175          | -5.045192924 | 0.009230869 | 0.034389177 |
| ARMC10          | -5.04546179  | 1.95E-05    | 0.000296843 |
| TCP11L1         | -5.046042418 | 0.004382757 | 0.019417604 |
| ENSG00000256966 | -5.047033434 | 0.003441865 | 0.016023204 |
| ASL             | -5.047171518 | 0.005586684 | 0.023390255 |
| MED27           | -5.047929158 | 0.00649001  | 0.026176303 |
| ENSG00000213976 | -5.048912362 | 0.023028589 | 0.068768273 |
| AKR1A1          | -5.050147928 | 1.43E-05    | 0.000227833 |
| CIAO2A          | -5.050196522 | 0.000411897 | 0.003092801 |
| TTC7B           | -5.050319657 | 0.002009857 | 0.010513099 |
| ANKMY2          | -5.050552853 | 0.019677309 | 0.061038992 |
| FRS2            | -5.051709479 | 0.005520739 | 0.02320344  |
| PFKFB2          | -5.051735588 | 0.001390542 | 0.007976834 |
| SNU13           | -5.052244213 | 0.001179935 | 0.007029502 |
| ADSS1           | -5.052657558 | 0.005527662 | 0.023215414 |
| RAMP2           | -5.05369274  | 0.010151291 | 0.03697988  |
| ARMCX7P         | -5.055769349 | 0.012073928 | 0.042225607 |
| GCFC2           | -5.056005658 | 0.000249017 | 0.002139176 |
| ENSG00000283782 | -5.057246333 | 0.015918586 | 0.052061561 |
| GPATCH4         | -5.057427101 | 0.012609144 | 0.043655914 |
| SLC5A9          | -5.058725397 | 0.003258943 | 0.015348733 |
| MRTFA           | -5.060226508 | 0.004481764 | 0.019747823 |
| MAGED4          | -5.060251693 | 0.015821968 | 0.051843286 |
| DNTTIP1         | -5.060274786 | 0.000169157 | 0.001588422 |
| RRP1            | -5.060621915 | 9.06E-05    | 0.000993154 |
| EXOSC7          | -5.061728664 | 1.60E-05    | 0.000249345 |
| FAM3A           | -5.062413313 | 0.000109279 | 0.001133808 |
| ORAI3           | -5.062575896 | 0.018651889 | 0.058588962 |
| ENSG00000213985 | -5.06277435  | 0.003732542 | 0.017042129 |
| NAT9            | -5.06279424  | 0.003950093 | 0.017833616 |

|          |              |             |             |
|----------|--------------|-------------|-------------|
| EHHADH   | -5.063461693 | 0.009520232 | 0.035207114 |
| NPIP14P  | -5.063591554 | 0.002939361 | 0.014185818 |
| NPM1P7   | -5.064130682 | 0.015312014 | 0.050563013 |
| PIAS3    | -5.065243601 | 5.32E-07    | 1.34E-05    |
| ZNF17    | -5.065286704 | 0.001410618 | 0.008063531 |
| METRNL   | -5.06595083  | 0.008903398 | 0.033447155 |
| CNOT3    | -5.067508595 | 0.022322319 | 0.067228003 |
| SLC19A1  | -5.067889149 | 0.004263217 | 0.018985273 |
| ZCCHC9   | -5.068818059 | 0.007532662 | 0.029392439 |
| RFK      | -5.069326028 | 0.005478598 | 0.023097508 |
| SMYD5    | -5.071124382 | 0.018533494 | 0.058373515 |
| PRKCZ    | -5.072076492 | 3.86E-05    | 0.000509838 |
| PPARA    | -5.072423259 | 0.000133555 | 0.001329377 |
| TSPAN7   | -5.07371833  | 0.023283758 | 0.069347097 |
| PHAF1    | -5.074374178 | 0.00145198  | 0.008227888 |
| MTERF3   | -5.075493427 | 0.014102145 | 0.04747124  |
| SF3B4    | -5.075780872 | 0.003706734 | 0.016981949 |
| HAUS5    | -5.077299148 | 0.000280609 | 0.002339183 |
| KIF3A    | -5.077520963 | 5.29E-05    | 0.000653437 |
| TTC39C   | -5.077707547 | 0.000118175 | 0.001209124 |
| CPPED1   | -5.078828797 | 0.02922268  | 0.082418041 |
| NDUFA10  | -5.078884137 | 1.30E-06    | 2.87E-05    |
| ENPP5    | -5.079175892 | 0.001997871 | 0.010486583 |
| JOSD1    | -5.080391534 | 0.004061709 | 0.018228746 |
| ZNF529   | -5.081148533 | 0.002556399 | 0.012697029 |
| SUPT4H1  | -5.081460546 | 0.006965063 | 0.027704607 |
| NAMPTP1  | -5.082505086 | 0.021049259 | 0.064260919 |
| WDR24    | -5.084283515 | 0.003242732 | 0.015290231 |
| MTG2     | -5.084667664 | 0.001409922 | 0.008063531 |
| AASDHPPT | -5.085171583 | 0.005140687 | 0.021986881 |
| GTPBP1   | -5.085949672 | 0.000146114 | 0.001428564 |
| CCDC82   | -5.085958138 | 0.000251334 | 0.00215145  |
| IGSF6    | -5.089108805 | 0.0066447   | 0.026702341 |
| CHD1L    | -5.089137684 | 2.99E-07    | 8.00E-06    |
| ARNT2    | -5.089547938 | 0.001141887 | 0.006849059 |
| COPE     | -5.089689933 | 0.000517269 | 0.003685123 |
| BLZF1    | -5.091147239 | 0.000249917 | 0.002143865 |
| RABL2B   | -5.092322281 | 0.000171446 | 0.001601252 |
| ETV3     | -5.092972277 | 0.011913462 | 0.041809379 |
| PEAR1    | -5.093258451 | 0.006045331 | 0.024795893 |
| DPY19L2  | -5.094205606 | 0.001592627 | 0.008802352 |
| ATP7B    | -5.095479631 | 0.009488347 | 0.035114508 |
| OSGIN2   | -5.096096199 | 0.000121826 | 0.001238104 |
| POLR2I   | -5.096237544 | 0.006128412 | 0.025034864 |

|          |              |             |             |
|----------|--------------|-------------|-------------|
| MACC1    | -5.097621618 | 6.90E-05    | 0.000809238 |
| TPST2    | -5.098059531 | 0.001352485 | 0.007793539 |
| IL12RB2  | -5.098313656 | 0.036632489 | 0.096896775 |
| RNF144B  | -5.098409845 | 0.009782987 | 0.035980939 |
| ROBO3    | -5.098624609 | 0.009429183 | 0.034934446 |
| TRIM73   | -5.099111012 | 0.00011059  | 0.00114311  |
| LUM      | -5.09962319  | 0.03589624  | 0.09563266  |
| TXK      | -5.100320969 | 0.008741587 | 0.032880101 |
| ZNF253   | -5.100841624 | 0.000312253 | 0.002538288 |
| GABPA    | -5.101497329 | 0.035487452 | 0.094988969 |
| L3MBTL2  | -5.101629452 | 0.000455439 | 0.003340993 |
| BTF3L4P2 | -5.102322111 | 0.003064834 | 0.014646539 |
| EXOSC1   | -5.103209781 | 0.000656775 | 0.004468577 |
| BRCC3    | -5.104005736 | 0.035736895 | 0.095361416 |
| CRELD1   | -5.104325667 | 0.017276258 | 0.05526211  |
| LRRC47   | -5.105095987 | 0.003080081 | 0.014695035 |
| KCTD20   | -5.105310078 | 0.00012275  | 0.001246448 |
| MINDY4   | -5.105570735 | 0.000898193 | 0.005674182 |
| MRPL58   | -5.109464838 | 0.036364831 | 0.096420573 |
| SAP30L   | -5.110384786 | 0.000242708 | 0.002103497 |
| CRYBG1   | -5.110547874 | 0.0119989   | 0.042023924 |
| IL11RA   | -5.111958376 | 0.000572133 | 0.00400526  |
| DHX34    | -5.112332087 | 0.01384504  | 0.046770964 |
| TMEM91   | -5.11293624  | 0.009427696 | 0.034934446 |
| ZNF66    | -5.113650879 | 0.012553238 | 0.043524605 |
| SHMT2    | -5.114369078 | 0.000728652 | 0.00483531  |
| RNF8     | -5.114655214 | 0.001976012 | 0.010417097 |
| SUFU     | -5.114664274 | 0.018692032 | 0.058674366 |
| NETO2    | -5.114847685 | 0.020029712 | 0.061815306 |
| MSRB3    | -5.114901569 | 0.000104597 | 0.001092356 |
| TMEM219  | -5.115548086 | 0.001920575 | 0.010182735 |
| SGK3     | -5.115710498 | 0.000128226 | 0.001292293 |
| GLMN     | -5.115799901 | 0.000121751 | 0.001238104 |
| TMEM237  | -5.115881657 | 0.008097801 | 0.031068379 |
| TUBGCP5  | -5.11627178  | 0.002012201 | 0.010520815 |
| RAB6A    | -5.117734851 | 3.18E-05    | 0.000438339 |
| MEST     | -5.11928392  | 0.018947402 | 0.059322129 |
| PHC2     | -5.120551701 | 0.001756443 | 0.009486832 |
| ZCRB1    | -5.120652846 | 0.034208568 | 0.092300603 |
| ZNF793   | -5.122563321 | 3.98E-05    | 0.000521403 |
| OCIAD2   | -5.122749795 | 0.002820049 | 0.013720671 |
| SUCLA2   | -5.122860554 | 0.004320605 | 0.019191415 |
| WDR83OS  | -5.124152606 | 0.000223334 | 0.001967423 |
| ALG1     | -5.124550537 | 0.003254606 | 0.015334274 |

|                 |              |             |             |
|-----------------|--------------|-------------|-------------|
| LRIF1           | -5.126500826 | 0.00703945  | 0.027904847 |
| ENSG00000268790 | -5.126653441 | 0.00631691  | 0.025649071 |
| TCF20           | -5.126828683 | 0.009067632 | 0.033874882 |
| TMEM176B        | -5.12694995  | 0.021933543 | 0.066238423 |
| COL4A3          | -5.127438558 | 0.0004959   | 0.003566473 |
| ZNF396          | -5.1275019   | 0.024524236 | 0.072197432 |
| HSD17B14        | -5.128069388 | 0.001199704 | 0.007118241 |
| C19orf54        | -5.128124781 | 0.008154251 | 0.031243766 |
| PRNP            | -5.128631364 | 0.000352246 | 0.002754252 |
| ZNF112          | -5.128829152 | 0.00239175  | 0.012082528 |
| CYB5R2          | -5.128923826 | 0.022769696 | 0.068162488 |
| C3orf52         | -5.130217997 | 6.34E-05    | 0.000760291 |
| TRIM6           | -5.13089404  | 0.00138275  | 0.007939659 |
| ENSG00000240695 | -5.131653888 | 0.003028973 | 0.014514129 |
| FSTL3           | -5.131914864 | 0.000819962 | 0.005276355 |
| POLG2           | -5.133028256 | 0.019554687 | 0.060720866 |
| SLC1A1          | -5.134259713 | 0.034122034 | 0.092151948 |
| ZFP2            | -5.134626531 | 0.017118609 | 0.054888381 |
| HLA-DRA         | -5.135006418 | 0.01589131  | 0.052010993 |
| SLC35F2         | -5.135033843 | 0.008321505 | 0.031753939 |
| DCUN1D1         | -5.135806394 | 7.46E-05    | 0.000860223 |
| SLC26A5         | -5.136133906 | 0.009960054 | 0.03646331  |
| ZFAND5          | -5.136942642 | 2.54E-05    | 0.000369257 |
| ANKRD20A1       | -5.139251976 | 0.005812397 | 0.024052395 |
| LYSMD4          | -5.141396902 | 0.009617264 | 0.035490049 |
| SLC4A3          | -5.142362382 | 0.017683171 | 0.056325554 |
| F8              | -5.142757618 | 0.00104693  | 0.006377474 |
| FLACC1          | -5.143078667 | 0.008284609 | 0.031643076 |
| PPP6C           | -5.143482508 | 3.20E-05    | 0.000439607 |
| ASB7            | -5.144006037 | 0.01877288  | 0.058882338 |
| QRICH2          | -5.145707072 | 0.003447162 | 0.016041696 |
| SENP1           | -5.148054149 | 0.000278298 | 0.002321512 |
| TGFBR1          | -5.149248051 | 6.67E-05    | 0.000791876 |
| CEP20           | -5.150014515 | 0.000910935 | 0.005739815 |
| LSM8            | -5.150594845 | 0.013562519 | 0.046065658 |
| CACYBP          | -5.153109248 | 0.001711348 | 0.009276378 |
| TMX4            | -5.153149915 | 0.008018112 | 0.030849086 |
| PAQR3           | -5.153631997 | 0.00740247  | 0.02898722  |
| NOTCH4          | -5.155342783 | 7.32E-05    | 0.000849081 |
| VWA5B1          | -5.155663858 | 0.003033779 | 0.014531404 |
| HS2ST1          | -5.15796543  | 0.002661078 | 0.013093369 |
| ENSG00000246596 | -5.15813215  | 0.001408911 | 0.008063531 |
| SNRPGP15        | -5.158132982 | 0.026395659 | 0.076397191 |
| ENSG00000235105 | -5.158631907 | 0.000486538 | 0.003517954 |



|                 |              |             |             |
|-----------------|--------------|-------------|-------------|
| ZNF551          | -5.158812775 | 0.002817235 | 0.013718904 |
| BTNL9           | -5.159049969 | 0.004411024 | 0.019507445 |
| RTL5            | -5.159421729 | 7.35E-05    | 0.000851526 |
| HSPB11          | -5.159795494 | 0.000611135 | 0.004226961 |
| BBS4            | -5.160726931 | 0.000183173 | 0.00168091  |
| DECR1           | -5.160736711 | 0.0002259   | 0.001985687 |
| MPP1            | -5.162961091 | 0.000436957 | 0.003233023 |
| TCHP            | -5.165362826 | 0.000114533 | 0.001176828 |
| RAD52           | -5.166069345 | 0.00366522  | 0.016817218 |
| ENSG00000283201 | -5.166644223 | 0.018804015 | 0.058955965 |
| AMOT            | -5.166657815 | 0.000683274 | 0.004610001 |
| EMID1           | -5.166886938 | 0.002487555 | 0.012457329 |
| FECH            | -5.167201761 | 0.000535137 | 0.003799004 |
| CHMP7           | -5.167459171 | 9.93E-05    | 0.001054296 |
| ICA1L           | -5.168295927 | 8.24E-05    | 0.000926388 |
| TREH            | -5.168677969 | 0.007007442 | 0.027834835 |
| SULT1A3         | -5.168985265 | 0.002831677 | 0.013764908 |
| TECR            | -5.169319851 | 0.000168412 | 0.001582652 |
| AXL             | -5.170975234 | 0.000645513 | 0.004409307 |
| SANBR           | -5.171351052 | 0.001911434 | 0.010147367 |
| PITPNA          | -5.171362218 | 0.000186973 | 0.001711798 |
| AGR2            | -5.171484055 | 0.018113514 | 0.057454396 |
| MTURN           | -5.17222271  | 0.001280285 | 0.007470701 |
| LRRC70          | -5.17285393  | 0.002250292 | 0.011507194 |
| MVK             | -5.173425518 | 0.002664534 | 0.013099725 |
| GPAT4           | -5.17429673  | 2.10E-05    | 0.000313777 |
| RPL7P57         | -5.174463135 | 0.006644421 | 0.026702341 |
| GATA3           | -5.175053408 | 0.011911358 | 0.041809379 |
| ZMAT4           | -5.176341343 | 0.03568742  | 0.0952714   |
| KY              | -5.176855517 | 0.000791223 | 0.005159999 |
| AAGAB           | -5.177633795 | 0.001934365 | 0.01023752  |
| PLPP5           | -5.178584921 | 1.60E-05    | 0.000249345 |
| REPS2           | -5.178938812 | 0.006835494 | 0.027296874 |
| SLC10A7         | -5.179062469 | 0.016943373 | 0.054498714 |
| SSBP1           | -5.180484697 | 0.00797724  | 0.030730909 |
| DUSP22          | -5.180574305 | 0.000326543 | 0.002625618 |
| KDM7A           | -5.18113065  | 0.038628284 | 0.100875243 |
| TCEAL1          | -5.181554551 | 0.00357969  | 0.016499834 |
| CCDC149         | -5.182881499 | 0.000438592 | 0.003242956 |
| TRPC1           | -5.182936427 | 0.008068676 | 0.030994369 |
| ZNRF3           | -5.182941351 | 0.002749953 | 0.013426959 |
| GALNT2          | -5.183180336 | 0.001512635 | 0.008476361 |
| PRDM15          | -5.183190384 | 0.010407392 | 0.037614533 |
| RRAGB           | -5.183546293 | 0.002181877 | 0.011247632 |

|                 |              |             |             |
|-----------------|--------------|-------------|-------------|
| SMO             | -5.184564872 | 0.010361356 | 0.03749293  |
| RAB7A           | -5.185846899 | 0.000157541 | 0.001505031 |
| STXBP4          | -5.186916497 | 0.000468762 | 0.00341595  |
| FAM72A          | -5.189220649 | 0.032139858 | 0.088253367 |
| GPR107          | -5.189515918 | 8.83E-05    | 0.000973601 |
| SMARCE1         | -5.189831973 | 0.021645032 | 0.065662022 |
| GPRC5D          | -5.190317671 | 0.009823222 | 0.036117945 |
| NDUFB4          | -5.191005198 | 0.001086752 | 0.006577023 |
| SELENOS         | -5.191288804 | 0.004614059 | 0.020161938 |
| GNPDA2          | -5.191556448 | 0.008595219 | 0.032480964 |
| CNTNAP3B        | -5.192632521 | 0.002649013 | 0.013039307 |
| BCS1L           | -5.192785008 | 0.003889973 | 0.017608164 |
| PSMD13          | -5.194191258 | 1.31E-05    | 0.000212204 |
| ENSG00000273047 | -5.196237613 | 0.002313891 | 0.011767791 |
| WDR87BP         | -5.196516303 | 0.004464664 | 0.019686812 |
| FKTN            | -5.197163647 | 0.002593383 | 0.012853444 |
| NAGS            | -5.197951782 | 0.005551697 | 0.023277264 |
| KLF3            | -5.198373892 | 0.000647606 | 0.004418613 |
| MUC20           | -5.198702975 | 0.012505813 | 0.043385026 |
| SPCS2           | -5.199111479 | 0.000416537 | 0.003121732 |
| RRN3P1          | -5.199805392 | 0.000377423 | 0.002890625 |
| CBR4            | -5.200091674 | 0.008611997 | 0.032513914 |
| FAM86DP         | -5.201442053 | 0.005945561 | 0.024502918 |
| TMOD2           | -5.201451871 | 0.004403579 | 0.019488452 |
| SLC26A6         | -5.201984382 | 0.003603965 | 0.016586461 |
| SEH1L           | -5.202337836 | 1.71E-05    | 0.000263492 |
| ADGRA2          | -5.203054128 | 0.017143588 | 0.054924826 |
| PHF6            | -5.20343133  | 0.002970484 | 0.014307496 |
| RPS4XP6         | -5.204399958 | 0.003449544 | 0.016045974 |
| AIDAP1          | -5.205413248 | 0.000113519 | 0.001169353 |
| CABYR           | -5.205799231 | 0.031711916 | 0.087475167 |
| YIPF4           | -5.207393928 | 0.001530687 | 0.008557707 |
| GPR176          | -5.207616491 | 0.004545072 | 0.019918013 |
| ATP6V1B2        | -5.21000202  | 4.88E-05    | 0.000613241 |
| TMEM37          | -5.210039222 | 0.001724335 | 0.009331675 |
| ULK4P2          | -5.210438804 | 0.013549954 | 0.046043976 |
| SMIM8           | -5.210816682 | 0.010946919 | 0.039132164 |
| VTI1B           | -5.210997233 | 3.58E-05    | 0.000482114 |
| SFXN4           | -5.211039164 | 0.010710781 | 0.038424214 |
| MMP19           | -5.21112516  | 0.001280709 | 0.007470701 |
| IDH3B           | -5.211309631 | 2.60E-05    | 0.000375053 |
| SMN2            | -5.213091411 | 0.021701348 | 0.065765563 |
| NGDN            | -5.214020425 | 0.007387864 | 0.028958128 |
| COPS4           | -5.214109176 | 0.000123524 | 0.001253257 |

|                 |              |             |             |
|-----------------|--------------|-------------|-------------|
| TAPBP           | -5.2152191   | 1.22E-06    | 2.72E-05    |
| ENSG00000237493 | -5.216904324 | 0.010276162 | 0.037284971 |
| TNFSF10         | -5.217686776 | 0.001316507 | 0.007620758 |
| QRSL1           | -5.21809182  | 0.001541262 | 0.008605565 |
| HCCS            | -5.218973757 | 0.009769156 | 0.035940991 |
| HR              | -5.21957186  | 0.009723197 | 0.035815453 |
| GLT8D1          | -5.219907093 | 0.000363655 | 0.00281078  |
| UXT             | -5.220114183 | 0.000316908 | 0.002567505 |
| HLA-DPB1        | -5.220567444 | 0.004491699 | 0.019770008 |
| OGFOD2          | -5.221216476 | 3.92E-05    | 0.000515043 |
| CDK19           | -5.22179484  | 0.001414025 | 0.008073283 |
| ANKRD20A21P     | -5.222165209 | 0.010327379 | 0.037415535 |
| IDNK            | -5.222887794 | 0.017845901 | 0.056709579 |
| DDAH1           | -5.223330765 | 0.031769773 | 0.087594421 |
| RMDN2           | -5.223973619 | 0.01995499  | 0.061681805 |
| TMEM163         | -5.224093701 | 0.009049147 | 0.033834066 |
| AGPAT1          | -5.22573478  | 0.000293404 | 0.002415894 |
| TSSK4           | -5.225794384 | 0.00063167  | 0.004341703 |
| TRAPPC12        | -5.226833392 | 0.005656412 | 0.023624987 |
| EAF1            | -5.227006739 | 0.009667614 | 0.035654114 |
| FUBP3           | -5.227785641 | 0.003773504 | 0.017157963 |
| CLYBL           | -5.22828787  | 0.010231754 | 0.037164803 |
| GSTT1           | -5.22842002  | 0.00151343  | 0.008476891 |
| RAE1            | -5.229232345 | 0.002027969 | 0.010584966 |
| HILPDA          | -5.231968264 | 0.000907793 | 0.005725858 |
| CDKN1A          | -5.232734416 | 1.03E-06    | 2.36E-05    |
| CFB             | -5.232968145 | 0.010717268 | 0.038436092 |
| RPP30           | -5.232996524 | 0.002787906 | 0.013601295 |
| WDR47           | -5.23364703  | 0.001389089 | 0.007972276 |
| IQCC            | -5.23383945  | 0.008292236 | 0.031662216 |
| IGHV4-34        | -5.234208134 | 0.033620168 | 0.091160062 |
| UBE2A           | -5.234454661 | 0.000363282 | 0.002810753 |
| NAGPA           | -5.234533591 | 0.008514572 | 0.032268153 |
| WDR53           | -5.234752463 | 0.010136985 | 0.036946122 |
| CYP7B1          | -5.234862121 | 0.016950666 | 0.054498714 |
| CEP89           | -5.237027523 | 0.001758407 | 0.009488593 |
| PPP3CC          | -5.23965243  | 0.000154335 | 0.001486135 |
| KRT86           | -5.240631159 | 0.002961609 | 0.014276111 |
| WDR3            | -5.241382749 | 0.00149883  | 0.00843022  |
| KCNQ3           | -5.241384387 | 0.000353321 | 0.002757314 |
| RFNG            | -5.241425681 | 0.000889295 | 0.005636997 |
| TRUB2           | -5.24146305  | 0.007255898 | 0.028597607 |
| MYRIP           | -5.243503261 | 0.016902689 | 0.054426748 |
| DCAF11          | -5.244325008 | 1.04E-05    | 0.00017367  |

|           |              |             |             |
|-----------|--------------|-------------|-------------|
| PRR29     | -5.244874269 | 0.007258675 | 0.028597607 |
| RGS14     | -5.245573085 | 0.002977594 | 0.014330339 |
| RAB29     | -5.245650307 | 0.000275483 | 0.002302994 |
| RPL13AP25 | -5.246168826 | 0.000663642 | 0.004502644 |
| MRPS34    | -5.246278345 | 0.01608353  | 0.052402153 |
| ATP5PD    | -5.247680328 | 0.000153711 | 0.001483582 |
| MUC20P1   | -5.247964325 | 0.002499527 | 0.012491444 |
| RPS19BP1  | -5.248917201 | 0.001473474 | 0.008326298 |
| CD9       | -5.251455766 | 0.021955902 | 0.066280267 |
| MFN1      | -5.252105374 | 3.27E-06    | 6.37E-05    |
| ACTG1P10  | -5.253458405 | 0.003611685 | 0.016609361 |
| RAB43     | -5.253787956 | 8.22E-05    | 0.000924414 |
| CPSF1P1   | -5.253846349 | 0.001442523 | 0.008197213 |
| DUSP23    | -5.253949162 | 0.016898242 | 0.054426748 |
| CGN       | -5.25440351  | 0.015812156 | 0.051839277 |
| RXRB      | -5.254436326 | 0.005442957 | 0.022995307 |
| VPS72     | -5.255309228 | 0.004114423 | 0.018383526 |
| POLR2B    | -5.255653107 | 1.70E-05    | 0.000262186 |
| B4GALT7   | -5.260267742 | 0.001931967 | 0.010233932 |
| GCSHP5    | -5.260306569 | 0.014400141 | 0.04818082  |
| KDM8      | -5.260321591 | 0.01015633  | 0.03697988  |
| TRMT44    | -5.260438322 | 0.000627283 | 0.004313998 |
| DCAF10    | -5.262156783 | 0.000980467 | 0.006084019 |
| PARD6G    | -5.262169498 | 0.015847805 | 0.051899846 |
| MYSM1     | -5.262319327 | 9.90E-05    | 0.001053003 |
| NLE1      | -5.262622052 | 8.41E-05    | 0.000938058 |
| PCYT2     | -5.263043938 | 0.00675398  | 0.027042729 |
| ARHGAP31  | -5.264800955 | 0.009244524 | 0.034426698 |
| MID2      | -5.265636035 | 0.001312444 | 0.007606273 |
| COX15     | -5.266767204 | 0.000180682 | 0.001664365 |
| CDIP1     | -5.266946065 | 0.004437198 | 0.019601404 |
| UBE2D4    | -5.270138376 | 0.002611149 | 0.012919084 |
| KIAA1755  | -5.270391408 | 0.00500406  | 0.021531867 |
| LARP1B    | -5.270407913 | 0.000155163 | 0.001490585 |
| ENTPD5    | -5.270546412 | 0.001672901 | 0.009135508 |
| SERPINB1  | -5.270835413 | 0.00050733  | 0.00362927  |
| JAM2      | -5.270850853 | 0.004606573 | 0.02015006  |
| ABHD14B   | -5.271636703 | 0.000298312 | 0.002444668 |
| UTP4      | -5.273225145 | 0.001830203 | 0.009776157 |
| CCDC59    | -5.273900889 | 0.015599317 | 0.051263154 |
| AJUBA     | -5.2765146   | 0.000209942 | 0.001875379 |
| THUMPD1   | -5.27652072  | 0.000925746 | 0.005814855 |
| UNG       | -5.27676124  | 0.006081351 | 0.024918305 |
| CATSPER2  | -5.277195214 | 0.000208828 | 0.001866804 |

|          |              |             |             |
|----------|--------------|-------------|-------------|
| ABHD17C  | -5.277313053 | 0.031337352 | 0.086738465 |
| FCGR2C   | -5.277569132 | 0.004528218 | 0.01986573  |
| TMEM167B | -5.277583077 | 0.015302355 | 0.050551228 |
| ITPRIP   | -5.27788947  | 3.71E-06    | 7.10E-05    |
| NKAPD1   | -5.278548844 | 5.28E-05    | 0.000652539 |
| SERINC2  | -5.280606383 | 0.000838036 | 0.005367897 |
| GUSBP2   | -5.280755439 | 0.000190347 | 0.001734909 |
| FAIM     | -5.280877534 | 0.003482404 | 0.016162067 |
| SCOC     | -5.28277369  | 0.001256614 | 0.007375924 |
| MBTPS1   | -5.284456319 | 4.13E-05    | 0.000536661 |
| DDIT3    | -5.284550248 | 0.00046745  | 0.003408441 |
| TMED4    | -5.28522003  | 2.97E-07    | 7.99E-06    |
| KMT5C    | -5.285659168 | 0.000456808 | 0.003346977 |
| RALGPS2  | -5.287768855 | 0.002450069 | 0.012300138 |
| PAICS    | -5.287994817 | 3.14E-06    | 6.15E-05    |
| RHPN2    | -5.288825159 | 0.019849218 | 0.061472535 |
| MGLL     | -5.289176049 | 9.41E-05    | 0.00101587  |
| RPL24P8  | -5.289973837 | 0.009843942 | 0.036172153 |
| DAPL1    | -5.290321365 | 0.030791403 | 0.085703245 |
| TRNAU1AP | -5.291826601 | 0.000829154 | 0.005322208 |
| LRRC37A  | -5.292321834 | 0.006297948 | 0.02558066  |
| ZIM2     | -5.293201208 | 0.031776859 | 0.087594421 |
| SRI      | -5.293690889 | 0.000277922 | 0.002319982 |
| FBXL2    | -5.298188976 | 0.002745458 | 0.013415836 |
| UBXN11   | -5.298644635 | 7.96E-05    | 0.00090428  |
| FGFR1OP2 | -5.300054161 | 0.000696561 | 0.004673703 |
| RNF216P1 | -5.300124634 | 0.001586261 | 0.008787232 |
| DEDD     | -5.301976985 | 4.07E-05    | 0.00053046  |
| TAF9B    | -5.303870283 | 0.007056211 | 0.027941525 |
| SUSD6    | -5.305045624 | 0.00610435  | 0.024978721 |
| PMS1     | -5.305430606 | 0.00206344  | 0.010723861 |
| SAMD1    | -5.306117359 | 0.000197873 | 0.001784691 |
| IL2RG    | -5.306249429 | 0.001974044 | 0.010417097 |
| SOX5     | -5.306926888 | 0.017698788 | 0.056345642 |
| SNAP29   | -5.307532639 | 0.002381932 | 0.012048017 |
| GMPPA    | -5.308142937 | 0.007642681 | 0.029697274 |
| TGM2     | -5.30842741  | 0.0005233   | 0.003725895 |
| ARHGEF28 | -5.309192065 | 5.49E-06    | 0.000100896 |
| GTF2F1   | -5.309253962 | 1.19E-05    | 0.000195366 |
| PPP4R1L  | -5.309452714 | 0.003534301 | 0.01634897  |
| WDHD1    | -5.310138761 | 0.013546391 | 0.046043976 |
| CASZ1    | -5.310222256 | 0.008000393 | 0.030790701 |
| PABPN1P1 | -5.310483246 | 0.000503729 | 0.003612046 |
| PA2G4P6  | -5.311203756 | 0.00087118  | 0.005546958 |

|           |              |             |             |
|-----------|--------------|-------------|-------------|
| SLC15A2   | -5.311260222 | 0.007401902 | 0.02898722  |
| ZNF607    | -5.312168016 | 0.000482409 | 0.003494365 |
| CHMP4BP1  | -5.312512755 | 0.003436576 | 0.016014585 |
| METTL2B   | -5.312855749 | 2.92E-05    | 0.000411979 |
| SLC66A3   | -5.313331145 | 0.009252617 | 0.034426698 |
| SLC49A4   | -5.313750169 | 8.79E-05    | 0.000971336 |
| PRDM10    | -5.313760626 | 0.001998923 | 0.010486583 |
| RSPH4A    | -5.314433097 | 0.015340271 | 0.050621221 |
| TMEM204   | -5.314484997 | 0.000584667 | 0.004071176 |
| UBE2V1    | -5.317648215 | 0.000697264 | 0.004673703 |
| DACT1     | -5.317701226 | 0.000103859 | 0.001088798 |
| ADHFE1    | -5.318253526 | 0.002219029 | 0.011395471 |
| ETNK1     | -5.31875522  | 0.001489199 | 0.008391648 |
| PRSS8     | -5.319376073 | 0.0065374   | 0.026332342 |
| SLC35C1   | -5.319415586 | 0.006870143 | 0.02738247  |
| EMC1      | -5.319540373 | 7.59E-05    | 0.000870441 |
| TM6SF1    | -5.320988448 | 0.005769325 | 0.023939632 |
| P2RY10    | -5.321048356 | 0.029360069 | 0.082733676 |
| SLC11A1   | -5.321332449 | 0.005409841 | 0.022879357 |
| TPGS2     | -5.322574184 | 2.16E-05    | 0.000321985 |
| ZNF16     | -5.322883125 | 0.001219083 | 0.00721554  |
| GCA       | -5.323116644 | 0.000493224 | 0.003555679 |
| ARHGAP42  | -5.325946873 | 0.000149659 | 0.001453826 |
| RBM38     | -5.326747472 | 0.000924214 | 0.005811265 |
| MORF4L1P1 | -5.327235308 | 0.005220133 | 0.02227566  |
| DPH5      | -5.327505404 | 0.014351482 | 0.048054671 |
| MAP4K1    | -5.327629073 | 0.004939081 | 0.021335939 |
| SMARCB1   | -5.327828013 | 0.031016562 | 0.086106528 |
| DENND1C   | -5.328689031 | 0.000289511 | 0.00239524  |
| COA1      | -5.3288918   | 0.000224659 | 0.001977655 |
| RTCB      | -5.329321356 | 0.003009211 | 0.014453764 |
| GTF3C6    | -5.32933799  | 0.00809821  | 0.031068379 |
| ADA       | -5.329666284 | 0.013110546 | 0.045071215 |
| QDPR      | -5.330232081 | 0.001300853 | 0.007566323 |
| PHKA2     | -5.332508954 | 0.000370647 | 0.002848969 |
| HAUS6     | -5.332512493 | 0.007863966 | 0.030391264 |
| PTS       | -5.33489716  | 0.001746374 | 0.009436654 |
| IGHV4-61  | -5.335714152 | 0.00832491  | 0.031756922 |
| ZNF674    | -5.335961907 | 0.000133663 | 0.001329377 |
| BOD1      | -5.336214271 | 0.002695993 | 0.013216809 |
| GBF1      | -5.337762229 | 0.001993941 | 0.010478705 |
| DDX39A    | -5.337797193 | 0.000254977 | 0.002174108 |
| BRMS1L    | -5.337868435 | 0.000950359 | 0.005938642 |
| GFRA2     | -5.338049262 | 0.002284444 | 0.011632695 |

|                 |              |             |             |
|-----------------|--------------|-------------|-------------|
| BCLAF3          | -5.341654143 | 0.000560507 | 0.003935256 |
| KBTBD11-OT1     | -5.34231362  | 0.007263598 | 0.028597607 |
| CASTOR2         | -5.34311321  | 0.027475104 | 0.078861433 |
| ZKSCAN2         | -5.34416057  | 0.000729829 | 0.004840467 |
| MRPL18          | -5.344937364 | 0.014318246 | 0.047967908 |
| SHQ1            | -5.347160438 | 8.95E-05    | 0.000983103 |
| FANK1           | -5.348388203 | 0.001309376 | 0.007597643 |
| U2AF1L4         | -5.348903028 | 6.06E-05    | 0.000732619 |
| AGK             | -5.349534814 | 0.013508285 | 0.045966059 |
| SLC43A2         | -5.349854079 | 8.37E-05    | 0.000934989 |
| ENSG00000284292 | -5.350752949 | 0.00725823  | 0.028597607 |
| WASHC3          | -5.350853601 | 0.000404351 | 0.003049384 |
| ENSG00000275495 | -5.350913932 | 0.006939999 | 0.027623067 |
| ZSCAN32         | -5.350994332 | 0.001511417 | 0.008475041 |
| ANKDD1A         | -5.351603298 | 0.008935823 | 0.033506567 |
| HSPB7           | -5.351965846 | 0.001239333 | 0.007303258 |
| AGPAT1          | -5.352071386 | 0.000254731 | 0.002174108 |
| AGPAT1          | -5.352071386 | 0.000254731 | 0.002174108 |
| TAF8            | -5.352212143 | 0.00160168  | 0.008836249 |
| ANO9            | -5.353540487 | 0.000981666 | 0.006084019 |
| PTPN22          | -5.353619198 | 0.029527829 | 0.08309808  |
| C1GALT1         | -5.354145514 | 0.014835309 | 0.049372171 |
| TPST1           | -5.354525634 | 0.007170629 | 0.028326794 |
| RCL1            | -5.356479537 | 0.002368436 | 0.011989774 |
| FBXO9           | -5.357977602 | 2.67E-07    | 7.30E-06    |
| PARP2           | -5.35798964  | 0.013241069 | 0.045338018 |
| RPS7P11         | -5.358342311 | 0.002197204 | 0.011312191 |
| ARHGAP10        | -5.35959358  | 0.001434923 | 0.008173323 |
| RBIS            | -5.359680357 | 0.002907275 | 0.014044409 |
| IFT74           | -5.360258    | 0.000805738 | 0.005218112 |
| THAP9           | -5.360342431 | 0.000434097 | 0.003217578 |
| IQCK            | -5.360918344 | 6.08E-05    | 0.000734593 |
| AFMID           | -5.362431089 | 5.49E-06    | 0.000100896 |
| UFM1            | -5.362540362 | 0.000567586 | 0.00397573  |
| DNASE1          | -5.366161754 | 0.000163529 | 0.001542754 |
| CEP170P1        | -5.3665607   | 0.003804162 | 0.017284377 |
| TSPAN5          | -5.366615156 | 0.002380967 | 0.012048017 |
| PSMB2           | -5.367423965 | 0.007407102 | 0.028995976 |
| SMURF1          | -5.367900703 | 0.005789224 | 0.024008324 |
| GHR             | -5.370023619 | 0.004489118 | 0.019765838 |
| SNAPIN          | -5.371579798 | 0.003177335 | 0.015052235 |
| CDH16           | -5.372020485 | 0.007275177 | 0.028618375 |
| CSKMT           | -5.372382396 | 0.000648535 | 0.004419968 |
| ANKEF1          | -5.37262656  | 0.002047276 | 0.010662748 |

|                 |              |             |             |
|-----------------|--------------|-------------|-------------|
| IFNAR2          | -5.37371531  | 0.000155649 | 0.001494035 |
| NAPEPLD         | -5.373860021 | 0.000395625 | 0.002992903 |
| NID2            | -5.374145886 | 0.000451135 | 0.003311422 |
| OR2A7           | -5.374348542 | 0.002491417 | 0.012468412 |
| NABP2           | -5.37527086  | 0.001312748 | 0.007606273 |
| CWF19L1         | -5.3763322   | 3.41E-05    | 0.000464755 |
| MRPL45          | -5.376912437 | 0.006887886 | 0.027442718 |
| EIF4A3          | -5.378763792 | 0.003115829 | 0.01481886  |
| CTU2            | -5.379744091 | 0.000406082 | 0.003058628 |
| CXCL12          | -5.381833722 | 0.003095451 | 0.01475092  |
| PUS3            | -5.382664657 | 0.002534817 | 0.012610534 |
| PMS2P7          | -5.383216958 | 0.028038077 | 0.080021901 |
| LTO1            | -5.383769283 | 3.27E-05    | 0.000447521 |
| SPTLC2          | -5.384270791 | 7.81E-05    | 0.000891369 |
| RAB10           | -5.38510417  | 4.73E-05    | 0.000598711 |
| KIF21B          | -5.385512123 | 0.005721244 | 0.023764564 |
| APOBEC3B        | -5.385619638 | 0.026450475 | 0.076492189 |
| ENSG00000271793 | -5.385925236 | 0.013620538 | 0.04618011  |
| RBMS1P1         | -5.385986821 | 0.011738851 | 0.04134043  |
| TTC8            | -5.38713187  | 0.000339564 | 0.002687386 |
| FTH1P23         | -5.387474648 | 3.24E-05    | 0.000444277 |
| POM121L9P       | -5.38821091  | 0.003912125 | 0.017681986 |
| IFITM1          | -5.388331887 | 0.003002627 | 0.014445073 |
| CACNB1          | -5.389168415 | 7.47E-07    | 1.80E-05    |
| ACRBP           | -5.390121547 | 0.002160729 | 0.011148109 |
| IDE             | -5.390229988 | 7.82E-06    | 0.00013657  |
| ECSIT           | -5.390371539 | 0.000554155 | 0.003899706 |
| PDIA3P1         | -5.391732268 | 0.000312604 | 0.002539437 |
| CTNS            | -5.396532052 | 0.02889036  | 0.081760327 |
| XPC             | -5.396657321 | 5.87E-05    | 0.000716198 |
| GOPC            | -5.396874176 | 0.014855568 | 0.04941242  |
| TRAF6           | -5.39689907  | 0.005298268 | 0.022528397 |
| KIAA0895        | -5.397609641 | 0.001617579 | 0.008883476 |
| MED8            | -5.39773603  | 0.006296994 | 0.02558066  |
| ENSG00000276393 | -5.400063897 | 0.003335408 | 0.015635856 |
| PLEK2           | -5.401744915 | 0.001561458 | 0.008689603 |
| ARHGAP19        | -5.401842976 | 0.001022454 | 0.006274295 |
| KLHL15          | -5.4038828   | 0.000156536 | 0.001498363 |
| ENSG00000270149 | -5.404164775 | 0.014645722 | 0.048862132 |
| GOLGA8J         | -5.404481446 | 0.008674734 | 0.032679421 |
| ZBED8           | -5.404543133 | 0.003141242 | 0.014916279 |
| TDRD10          | -5.405227509 | 0.000747563 | 0.004927238 |
| PARVG           | -5.405685791 | 0.003107865 | 0.014798426 |
| FILIP1          | -5.406004444 | 0.000119086 | 0.001216386 |



|                 |              |             |             |
|-----------------|--------------|-------------|-------------|
| MAP1LC3A        | -5.408214454 | 0.006450496 | 0.026069049 |
| TCFL5           | -5.40941169  | 0.001436552 | 0.008178753 |
| RAB3GAP1        | -5.410551813 | 1.95E-05    | 0.000296871 |
| HDDC2           | -5.411067856 | 1.36E-05    | 0.000218869 |
| RPSAP6          | -5.412100324 | 0.00176698  | 0.00951826  |
| ING5            | -5.412625828 | 0.00050254  | 0.003607797 |
| PFAS            | -5.416010741 | 0.000763829 | 0.00500562  |
| ENSG00000253882 | -5.416333063 | 0.020101144 | 0.061940999 |
| ZNF585A         | -5.416565116 | 0.000586314 | 0.004078589 |
| BTRC            | -5.416908374 | 0.000220704 | 0.001949927 |
| ARID3A          | -5.417699812 | 0.00302007  | 0.014488677 |
| UXS1            | -5.418135384 | 0.000352854 | 0.002757229 |
| IGLV3-19        | -5.41933671  | 0.028139448 | 0.080235542 |
| MANF            | -5.419894978 | 0.001620043 | 0.00889297  |
| CRISPLD1        | -5.422340173 | 0.013753106 | 0.04655134  |
| ENSG00000276005 | -5.423246511 | 0.0127539   | 0.044051076 |
| MAP2K3          | -5.423421159 | 0.00013975  | 0.001378942 |
| AR              | -5.424343638 | 0.000692594 | 0.004659901 |
| FAM219B         | -5.425957482 | 0.000147256 | 0.00143611  |
| PEPD            | -5.426004676 | 0.00108423  | 0.006565042 |
| ZNF48           | -5.427383676 | 0.001180101 | 0.007029502 |
| FBXW11          | -5.427693012 | 0.000130518 | 0.001309946 |
| ZSCAN25         | -5.432659196 | 0.000292882 | 0.002413239 |
| RBBP4P1         | -5.434273398 | 0.007695893 | 0.029866313 |
| PLAGL1          | -5.435574512 | 0.002514032 | 0.012548389 |
| PRKAR2A         | -5.436130137 | 7.72E-05    | 0.000882752 |
| TM2D3           | -5.440676518 | 2.92E-05    | 0.000411979 |
| DHPS            | -5.440751733 | 0.000668689 | 0.004529271 |
| CPEB2           | -5.440839307 | 0.000592566 | 0.004117349 |
| PDZK1P1         | -5.443291319 | 0.026706833 | 0.077095041 |
| ZNF343          | -5.445272935 | 1.23E-06    | 2.74E-05    |
| MRTO4           | -5.447806498 | 0.025637096 | 0.074576161 |
| FER1L6          | -5.447833526 | 0.01522071  | 0.050391541 |
| SELPLG          | -5.447900272 | 0.007698521 | 0.029866313 |
| ARHGEF10        | -5.448024668 | 0.000139785 | 0.001378942 |
| NUDT16L1        | -5.448482712 | 0.00214625  | 0.011082853 |
| GBP3            | -5.449178335 | 9.75E-05    | 0.001041603 |
| TPRA1           | -5.449397731 | 0.00154138  | 0.008605565 |
| DDX60L          | -5.449632355 | 8.89E-05    | 0.000976857 |
| NEXN            | -5.451573195 | 0.000127595 | 0.001288079 |
| CTAGE7P         | -5.452778841 | 0.005482441 | 0.023105664 |
| PRICKLE2        | -5.454244324 | 6.49E-06    | 0.000116364 |
| MYO7A           | -5.455525093 | 0.000988225 | 0.006111755 |
| FMO4            | -5.456098634 | 0.007249588 | 0.028597607 |

|                 |              |             |             |
|-----------------|--------------|-------------|-------------|
| HIRA            | -5.456330491 | 2.73E-05    | 0.000392531 |
| THBS2           | -5.457064276 | 0.006009897 | 0.024714715 |
| ZNF641          | -5.457880661 | 0.00157923  | 0.008764326 |
| AKAP7           | -5.458557793 | 0.003345977 | 0.015679327 |
| IGHG3           | -5.459162968 | 0.000243782 | 0.002109175 |
| RELT            | -5.459355726 | 0.000802595 | 0.005206115 |
| ZNF658          | -5.459506724 | 0.016869414 | 0.05436299  |
| CLOCK           | -5.459574173 | 0.000265148 | 0.002244302 |
| USP19           | -5.460539907 | 0.002738974 | 0.013389559 |
| KANK1           | -5.461877488 | 8.65E-05    | 0.000958062 |
| PRICKLE4        | -5.461976446 | 0.001474363 | 0.008327436 |
| KIAA1958        | -5.46321149  | 2.58E-06    | 5.19E-05    |
| BICDL2          | -5.464440305 | 0.000745787 | 0.00491935  |
| SUPT16HP1       | -5.464669497 | 0.000510502 | 0.003647645 |
| GPAM            | -5.465027551 | 0.000117328 | 0.00120249  |
| SH3BGRL         | -5.465194284 | 0.007995153 | 0.030780321 |
| PCDHGA10        | -5.465310647 | 0.007917343 | 0.030568266 |
| PUS10           | -5.466550914 | 0.001779005 | 0.009566005 |
| FAM76A          | -5.467361463 | 0.000709276 | 0.004735288 |
| PPP2R3A         | -5.468246523 | 0.003708386 | 0.01698309  |
| MSL3            | -5.468327867 | 0.000818708 | 0.005274307 |
| ERLIN1          | -5.468577049 | 0.000574851 | 0.004017316 |
| LRRC34          | -5.469372646 | 0.007794526 | 0.030195306 |
| INSIG1          | -5.470667293 | 0.002846177 | 0.013818275 |
| TMEM39B         | -5.47127244  | 0.000131805 | 0.001318484 |
| MCRIP1          | -5.471404279 | 0.000148247 | 0.001441272 |
| CDH26           | -5.472283609 | 0.02625409  | 0.076047984 |
| IGFBP2          | -5.473657139 | 0.000601757 | 0.004171629 |
| VRK2            | -5.474635796 | 5.02E-05    | 0.000625043 |
| FLAD1           | -5.474935374 | 0.00011648  | 0.001194808 |
| ELOF1           | -5.475331458 | 0.003082369 | 0.014700155 |
| C8orf44-SGK3    | -5.475529282 | 0.012117514 | 0.042314118 |
| TMEM25          | -5.476215879 | 0.00063467  | 0.004352433 |
| ATXN3           | -5.476793334 | 0.000348204 | 0.002731472 |
| BRSK1           | -5.477108182 | 0.002414616 | 0.012147343 |
| ARPIN-AP3S2     | -5.478386103 | 0.000420785 | 0.003145881 |
| ABHD16A         | -5.478694447 | 0.004963659 | 0.021418942 |
| GALNT12         | -5.478712544 | 0.003201757 | 0.015156071 |
| ENSG00000270099 | -5.481268476 | 0.015259099 | 0.050463423 |
| SEPTIN7P2       | -5.482508863 | 0.000393785 | 0.002980847 |
| MDH2            | -5.482557326 | 0.000329701 | 0.002637776 |
| CFAP97          | -5.482596281 | 0.002507667 | 0.012526949 |
| KLHL28          | -5.484289471 | 0.000120668 | 0.001230473 |
| SOCS2           | -5.484314658 | 0.002338765 | 0.01185941  |

|           |              |             |             |
|-----------|--------------|-------------|-------------|
| SYBU      | -5.485988394 | 0.003218589 | 0.015206009 |
| DHDDS     | -5.48675937  | 0.000229938 | 0.002015325 |
| CPSF4     | -5.487138164 | 0.000776377 | 0.005079603 |
| PGGT1B    | -5.487254326 | 0.000347929 | 0.002731085 |
| NFATC1    | -5.489012834 | 0.000160485 | 0.001524042 |
| C9orf72   | -5.489158545 | 0.002485902 | 0.012454206 |
| SLC4A7    | -5.489841628 | 1.96E-05    | 0.000297347 |
| ZNF681    | -5.490246786 | 0.000102643 | 0.001079403 |
| PSMC1P1   | -5.490865796 | 0.002721581 | 0.013320668 |
| GSS       | -5.492618725 | 0.011514499 | 0.040739987 |
| TNK1      | -5.494153951 | 0.013323522 | 0.04550449  |
| ARNTL2    | -5.495567973 | 0.002872909 | 0.013915044 |
| RGPD3     | -5.496822058 | 0.000340209 | 0.002687917 |
| EDF1      | -5.498147868 | 0.003011434 | 0.014458707 |
| TRMT12    | -5.498192045 | 0.002620035 | 0.012933483 |
| NOC2L     | -5.498234295 | 0.002100868 | 0.010890323 |
| IPCEF1    | -5.498241046 | 9.56E-05    | 0.001026303 |
| ZNF530    | -5.498751817 | 0.004432027 | 0.019585708 |
| TTF2      | -5.499060377 | 0.003294112 | 0.015478234 |
| SMTN      | -5.499433825 | 7.55E-07    | 1.81E-05    |
| TANK      | -5.499519762 | 2.83E-05    | 0.000402922 |
| LPCAT1    | -5.500617357 | 0.001616959 | 0.008883476 |
| DONSON    | -5.500694713 | 0.000449922 | 0.003308543 |
| KICS2     | -5.501190525 | 0.00640497  | 0.025928346 |
| TCAF1     | -5.501621324 | 0.000286753 | 0.002377304 |
| LCP1      | -5.501693926 | 0.001549549 | 0.008635238 |
| LIMS3     | -5.50261843  | 0.013174953 | 0.045239612 |
| ADGRE2    | -5.502751754 | 0.003311985 | 0.015538086 |
| TMEM205   | -5.502788785 | 3.32E-05    | 0.0004534   |
| TRIM36    | -5.503469321 | 0.000487574 | 0.003523338 |
| PANK4     | -5.50485098  | 0.000444496 | 0.003282599 |
| PRR5L     | -5.506366395 | 0.009489388 | 0.035114508 |
| PITHD1    | -5.506564854 | 0.007456626 | 0.02915213  |
| NOSTRIN   | -5.508128474 | 0.008171316 | 0.031299244 |
| GOLGA6L10 | -5.509184267 | 0.000923907 | 0.005811265 |
| USP46     | -5.510681249 | 0.001278571 | 0.007465421 |
| HFM1      | -5.510747249 | 0.002402355 | 0.012115876 |
| WASF3     | -5.511512558 | 0.025310883 | 0.073820468 |
| C1QTNF1   | -5.512246828 | 0.0011714   | 0.006991435 |
| OLFM2     | -5.512465072 | 0.001406372 | 0.008056186 |
| MCTP1     | -5.512559203 | 0.001246018 | 0.007333985 |
| NECAP2    | -5.512977015 | 0.000188109 | 0.001718213 |
| CCDC43    | -5.514031843 | 0.003111242 | 0.014805816 |
| PDZD8     | -5.514191198 | 0.004358703 | 0.019339347 |

|          |              |             |             |
|----------|--------------|-------------|-------------|
| BTBD8    | -5.516196071 | 0.013269879 | 0.045410975 |
| CASTOR3  | -5.51700172  | 0.000552347 | 0.003893774 |
| CBX3     | -5.517123951 | 0.000160413 | 0.001524042 |
| RAB31    | -5.517319409 | 0.000260913 | 0.002217764 |
| EPSTI1   | -5.51787937  | 0.007704536 | 0.029880073 |
| AP1S2    | -5.518015569 | 0.005790582 | 0.024008324 |
| ATPAF1   | -5.519159692 | 2.90E-05    | 0.000411097 |
| PIP4P1   | -5.519297429 | 0.001786152 | 0.009593938 |
| HLA-DMA  | -5.519450964 | 0.000269453 | 0.002268052 |
| RAB9A    | -5.521859734 | 0.004495995 | 0.019776246 |
| SALL1    | -5.523066854 | 0.000449798 | 0.003308543 |
| ZBTB34   | -5.524454409 | 0.000481033 | 0.003486482 |
| ZNF209P  | -5.524683031 | 0.001720569 | 0.009318018 |
| TMEM134  | -5.524801945 | 3.89E-05    | 0.000512103 |
| CHCHD7   | -5.524847143 | 2.83E-05    | 0.000402922 |
| PGAP6    | -5.526683437 | 3.17E-05    | 0.000438339 |
| GSTO1    | -5.527009396 | 0.001935182 | 0.01023752  |
| SKIDA1   | -5.527537817 | 0.00166654  | 0.009106907 |
| MAFK     | -5.527649879 | 0.00263708  | 0.013007014 |
| SMN2     | -5.529452426 | 0.000606086 | 0.004194432 |
| HAUS1    | -5.530030874 | 0.005597841 | 0.023420762 |
| MBD3     | -5.530557135 | 6.60E-05    | 0.000785307 |
| BNIPL    | -5.530657136 | 0.000312226 | 0.002538288 |
| ASPN     | -5.533492063 | 0.001703963 | 0.009249341 |
| MBNL3    | -5.533824429 | 0.000799182 | 0.005192326 |
| SEMA4F   | -5.534663297 | 1.30E-05    | 0.000211321 |
| UPK3B    | -5.535686667 | 0.001410985 | 0.008063531 |
| MYH11    | -5.537692593 | 0.002404557 | 0.012121931 |
| MRPL33   | -5.537732429 | 0.002799825 | 0.013653942 |
| ITGBL1   | -5.538935863 | 0.01285792  | 0.044352314 |
| POU5F1P4 | -5.54014634  | 0.005496481 | 0.023148714 |
| QTRT2    | -5.540850628 | 8.69E-06    | 0.00014977  |
| ZNF675   | -5.542518479 | 0.000244119 | 0.002109676 |
| MAP2K5   | -5.542692752 | 0.001067927 | 0.006492311 |
| RASSF5   | -5.543321543 | 0.000101777 | 0.001073091 |
| MTERF1   | -5.543356892 | 0.000239013 | 0.002075062 |
| NOTCH4   | -5.543996862 | 0.017141363 | 0.054924826 |
| H2AX     | -5.545498666 | 0.00584077  | 0.024145039 |
| VCAM1    | -5.547212954 | 0.007181988 | 0.028362408 |
| VWA5A    | -5.549409884 | 3.57E-05    | 0.00048057  |
| CRAMP1   | -5.549761208 | 8.10E-05    | 0.000914009 |
| RIMBP2   | -5.551550775 | 0.007202417 | 0.028424536 |
| KCTD13   | -5.552402266 | 0.000127957 | 0.001290659 |
| OR2A14   | -5.552440041 | 0.002242006 | 0.011479374 |

|                 |              |             |             |
|-----------------|--------------|-------------|-------------|
| MRPS21          | -5.55254306  | 0.02313847  | 0.069033286 |
| ZDHC18          | -5.553054452 | 0.000137526 | 0.001363325 |
| TMEM232         | -5.554546495 | 0.005018949 | 0.021572927 |
| WARS2           | -5.555556974 | 0.01193064  | 0.041853024 |
| ELP6            | -5.557616755 | 4.18E-05    | 0.000541911 |
| DTX3L           | -5.55804611  | 0.000434054 | 0.003217578 |
| STAT5A          | -5.558683958 | 6.42E-05    | 0.000765858 |
| AIF1L           | -5.561573214 | 0.00109899  | 0.006627889 |
| JMJD7           | -5.562457103 | 0.000957209 | 0.005975272 |
| LSM12P1         | -5.563569623 | 0.000339886 | 0.002687386 |
| TMED5           | -5.563782635 | 1.00E-04    | 0.001058744 |
| ARPP19          | -5.563934396 | 0.001191311 | 0.007085814 |
| EIF4E3          | -5.564302308 | 3.15E-05    | 0.000438182 |
| POU2F3          | -5.56460695  | 0.004774986 | 0.020737866 |
| PLPP1           | -5.564988935 | 0.003468453 | 0.016109804 |
| ARMC9           | -5.566779833 | 0.003079943 | 0.014695035 |
| PMS2CL          | -5.568345114 | 0.001042044 | 0.006363724 |
| ATG12           | -5.568376301 | 0.000417039 | 0.003121732 |
| CD200           | -5.568704276 | 7.30E-06    | 0.000129047 |
| WDR37           | -5.569915846 | 0.001989767 | 0.010462266 |
| IGDCC4          | -5.57063767  | 8.40E-05    | 0.000937759 |
| ENSG00000235036 | -5.570760279 | 0.011982434 | 0.041978403 |
| GJA4            | -5.571297585 | 0.000336596 | 0.002675089 |
| ITPA            | -5.57136393  | 0.00014296  | 0.001402263 |
| KIF21A          | -5.572036009 | 6.86E-06    | 0.000122228 |
| ENSG00000258150 | -5.572345582 | 0.005306859 | 0.022538322 |
| ZNF18           | -5.572827331 | 0.001588872 | 0.008793645 |
| STK16           | -5.573070741 | 0.000254626 | 0.002174108 |
| SGTA            | -5.573443816 | 0.002257161 | 0.011517992 |
| ANP32AP1        | -5.575573899 | 0.013538107 | 0.046029562 |
| CD320           | -5.577259055 | 0.00199959  | 0.010486583 |
| LY75-CD302      | -5.578290214 | 3.48E-05    | 0.000472038 |
| LYZ             | -5.578655512 | 0.003794711 | 0.017247909 |
| NUDT9           | -5.579203211 | 0.006659969 | 0.026745939 |
| RNF24           | -5.579535356 | 0.000138487 | 0.001371722 |
| APOBEC3F        | -5.580329231 | 0.012219189 | 0.042598231 |
| SRR             | -5.580980053 | 0.0049909   | 0.021482879 |
| ZNF100          | -5.58514542  | 0.00074562  | 0.00491935  |
| ZNF461          | -5.58633054  | 0.000158992 | 0.001516497 |
| ACTR6           | -5.587106975 | 0.000127246 | 0.001285634 |
| ATAD5           | -5.587174987 | 0.006162413 | 0.025144949 |
| SIAH1           | -5.588137093 | 0.001162985 | 0.006958362 |
| ACBD6           | -5.589037425 | 0.001789144 | 0.009603459 |
| TFF3            | -5.589614056 | 0.001780592 | 0.009570286 |

|                 |              |             |             |
|-----------------|--------------|-------------|-------------|
| ARHGAP36        | -5.590600123 | 0.002140075 | 0.011055685 |
| USP39           | -5.591098742 | 0.000275507 | 0.002302994 |
| DYRK2           | -5.595319311 | 0.001975607 | 0.010417097 |
| THOC7           | -5.596915773 | 0.003719118 | 0.017025798 |
| MICU1           | -5.597953412 | 6.70E-06    | 0.000119877 |
| GIPR            | -5.598967417 | 0.003159984 | 0.014981767 |
| LRRC42          | -5.599867241 | 0.003561292 | 0.01644978  |
| NSMCE3          | -5.600066617 | 0.001817532 | 0.009720687 |
| AGA             | -5.600583996 | 0.010066486 | 0.036766669 |
| GSK3A           | -5.600995319 | 1.24E-05    | 0.000203703 |
| NSL1            | -5.60132154  | 0.005710912 | 0.023746094 |
| EIF4E           | -5.602127157 | 5.58E-08    | 1.73E-06    |
| CINP            | -5.604123465 | 0.001343962 | 0.007757422 |
| TMEM129         | -5.605314054 | 1.73E-05    | 0.000266063 |
| ANO10           | -5.606215562 | 8.15E-05    | 0.000918352 |
| MLF1            | -5.607042302 | 0.006779943 | 0.027119773 |
| TOP3B           | -5.607602082 | 0.001545018 | 0.008617923 |
| HSPA1B          | -5.607954747 | 0.006783729 | 0.027125952 |
| SIGMAR1         | -5.609670285 | 0.007431273 | 0.029062402 |
| COLQ            | -5.611376278 | 0.002318195 | 0.011784725 |
| ENSG00000267952 | -5.611548517 | 0.00300577  | 0.014446959 |
| CFB             | -5.613156501 | 0.010093224 | 0.036812797 |
| TMEM258         | -5.613202727 | 0.000666053 | 0.004516473 |
| SNIP1           | -5.617102641 | 0.000489996 | 0.003536617 |
| ZNF605          | -5.617730889 | 1.25E-05    | 0.000204927 |
| EYA2            | -5.617735809 | 0.000322251 | 0.002598617 |
| ITGA2B          | -5.617813308 | 0.005856627 | 0.024202325 |
| SLU7            | -5.620588213 | 0.000357999 | 0.002782007 |
| GMFG            | -5.622423909 | 0.005064838 | 0.021731582 |
| RIMS2           | -5.623376149 | 1.48E-05    | 0.000233461 |
| RAF1            | -5.62350949  | 0.002673412 | 0.013122053 |
| OSTC            | -5.623560187 | 0.009765979 | 0.035940229 |
| SAAL1           | -5.625507497 | 0.002235754 | 0.011466766 |
| CYP2D6          | -5.625636346 | 0.001040432 | 0.006357089 |
| POP4            | -5.626785025 | 0.001315237 | 0.007617048 |
| MSMO1           | -5.627330299 | 0.000398214 | 0.003010608 |
| TTC38           | -5.627917638 | 0.000353126 | 0.002757314 |
| CYP2U1          | -5.629722408 | 0.005905256 | 0.024370004 |
| THRA            | -5.630535614 | 3.45E-05    | 0.000468057 |
| PGPEP1          | -5.631062171 | 0.001038331 | 0.006350661 |
| VPS33A          | -5.63130661  | 0.011002451 | 0.039272683 |
| TGFBR3          | -5.63312392  | 0.000142871 | 0.001402263 |
| ZNF880          | -5.633359559 | 0.005104003 | 0.021853148 |
| MLXIPL          | -5.634174744 | 3.67E-05    | 0.000488599 |

|          |              |             |             |
|----------|--------------|-------------|-------------|
| LAPTM5   | -5.634519157 | 0.000503432 | 0.003612046 |
| MRPL46   | -5.634564811 | 0.006774457 | 0.027106786 |
| HSD17B8  | -5.635267051 | 0.000450892 | 0.003311422 |
| SERPINH1 | -5.636055975 | 0.000427902 | 0.003189242 |
| SREBF2   | -5.636262318 | 0.000114459 | 0.001176828 |
| SNRPB2   | -5.638180335 | 0.000345867 | 0.002725502 |
| UBAC1    | -5.640251036 | 1.92E-05    | 0.00029291  |
| NPR2     | -5.641085351 | 0.007924405 | 0.030585778 |
| KATNAL1  | -5.641291173 | 0.002338007 | 0.01185941  |
| TM9SF4   | -5.641452051 | 0.004601015 | 0.020134016 |
| PDE1B    | -5.642806581 | 0.013199271 | 0.04525743  |
| ATP2C2   | -5.644419569 | 0.004750882 | 0.020662839 |
| PRELID3B | -5.645212121 | 0.000986237 | 0.006102972 |
| NANOGP4  | -5.645649015 | 0.002429629 | 0.01220765  |
| LY6E     | -5.648527583 | 0.002801226 | 0.013655273 |
| KAT6A    | -5.651803171 | 1.00E-05    | 0.000168133 |
| PCDHB3   | -5.652544256 | 0.013205236 | 0.04525743  |
| ADAMDEC1 | -5.652973865 | 0.034389061 | 0.092724637 |
| HLA-F    | -5.655538615 | 0.001449177 | 0.008218422 |
| CDC42SE1 | -5.656847535 | 1.28E-05    | 0.000209211 |
| ZNF398   | -5.659475082 | 0.000325822 | 0.002622173 |
| IMP4     | -5.661320768 | 0.00202424  | 0.010570061 |
| CEP57L1  | -5.662636126 | 0.000930465 | 0.005838437 |
| PIGV     | -5.662770633 | 0.031259726 | 0.086602821 |
| CERS6    | -5.664099535 | 0.002269038 | 0.011563972 |
| YIF1A    | -5.665012578 | 2.52E-05    | 0.000367646 |
| PPCDC    | -5.667690959 | 0.004197275 | 0.018726064 |
| ISY1     | -5.66903281  | 5.61E-05    | 0.000689681 |
| ZNF121   | -5.669629478 | 0.000327799 | 0.00262865  |
| LIAS     | -5.670039841 | 0.000113612 | 0.001169353 |
| GNG5     | -5.670624106 | 0.020953652 | 0.064030045 |
| LEF1     | -5.671456779 | 0.000749403 | 0.004929768 |
| MRPL21   | -5.672353654 | 0.006517713 | 0.026270529 |
| FN3K     | -5.672448456 | 3.51E-05    | 0.000474745 |
| SESTD1   | -5.673954085 | 0.000974335 | 0.006060304 |
| OSBP2    | -5.674310315 | 0.003437367 | 0.016014585 |
| PLEKHA8  | -5.675102172 | 0.000358094 | 0.002782007 |
| ECHDC3   | -5.675287005 | 0.003989672 | 0.017989865 |
| ATP2A1   | -5.675485699 | 0.005287939 | 0.02249744  |
| NUDT4P2  | -5.676201747 | 0.000717801 | 0.004776396 |
| AGFG2    | -5.676675587 | 0.011723432 | 0.041298143 |
| PRCP     | -5.676751708 | 0.000371185 | 0.002848969 |
| ATF7IP2  | -5.678525907 | 0.000171582 | 0.001601252 |
| TRIM23   | -5.679008674 | 6.88E-05    | 0.000808191 |

|                 |              |             |             |
|-----------------|--------------|-------------|-------------|
| CELF6           | -5.679379207 | 0.003965382 | 0.017895969 |
| SLC22A31        | -5.680060931 | 0.00252232  | 0.01256947  |
| TNFAIP8         | -5.680407376 | 0.001018962 | 0.006257494 |
| NUTM2G          | -5.681209246 | 0.002974426 | 0.014320783 |
| PLCH2           | -5.68364049  | 0.004069708 | 0.018241795 |
| BTN2A2          | -5.684938683 | 0.001760176 | 0.009490054 |
| LDAF1           | -5.687654336 | 0.020867834 | 0.063832264 |
| MAPK13          | -5.687974706 | 0.000163474 | 0.001542754 |
| FTH1P7          | -5.68850003  | 0.000382729 | 0.002922774 |
| RECQL           | -5.688527459 | 0.000175466 | 0.001627721 |
| PCDHAC1         | -5.691974557 | 0.000354632 | 0.002763982 |
| ELAPOR1         | -5.693762146 | 1.13E-06    | 2.55E-05    |
| CRADD           | -5.693855639 | 0.000285937 | 0.002373788 |
| CCDC18          | -5.697954571 | 0.004189937 | 0.018700222 |
| PLCG2           | -5.698086897 | 9.90E-05    | 0.001053003 |
| WDR75           | -5.698558777 | 0.000965413 | 0.006014078 |
| PDE6B           | -5.699954073 | 0.001240558 | 0.007306914 |
| ABCF2-H2BE1     | -5.701479067 | 0.000272344 | 0.002287287 |
| DNAJA4          | -5.702485841 | 0.000315266 | 0.002557598 |
| IKZF5           | -5.70439178  | 9.60E-05    | 0.001030365 |
| SH2D4A          | -5.705336522 | 0.000819486 | 0.005276096 |
| IL1RL1          | -5.705417435 | 0.005476885 | 0.023097508 |
| ESF1            | -5.706761632 | 0.005705947 | 0.023743574 |
| LRRC37BP1       | -5.707093111 | 0.000148079 | 0.001440799 |
| PIGB            | -5.707571343 | 9.38E-05    | 0.00101587  |
| GNAO1           | -5.707770587 | 6.62E-05    | 0.000786742 |
| STMN3           | -5.707819894 | 0.001582941 | 0.008776877 |
| ZNF317          | -5.709614182 | 0.00015432  | 0.001486135 |
| NDUFS2          | -5.710382147 | 0.000469243 | 0.003417396 |
| SARS2           | -5.710950595 | 0.000382247 | 0.00292275  |
| HLA-F           | -5.711605889 | 0.000161636 | 0.001532058 |
| TRAPPC4         | -5.712424454 | 5.63E-06    | 0.000102992 |
| SSX2IP          | -5.712511468 | 0.000765409 | 0.005013263 |
| PDCD10          | -5.712569412 | 8.76E-06    | 0.000150855 |
| UBE2B           | -5.713072293 | 0.000251268 | 0.00215145  |
| ATRNL1          | -5.713504929 | 0.003368708 | 0.015761439 |
| WDR77           | -5.713609447 | 0.000493999 | 0.003559148 |
| BRMS1           | -5.715790698 | 7.94E-05    | 0.00090428  |
| MED28           | -5.716579335 | 0.001089767 | 0.006588681 |
| ETNK2           | -5.716679144 | 0.000384002 | 0.00293062  |
| DLG2            | -5.718126484 | 0.000150308 | 0.001458963 |
| TMEM9B          | -5.719267948 | 0.000335703 | 0.002673256 |
| ENSG00000264187 | -5.71937795  | 0.000799128 | 0.005192326 |
| ABCA12          | -5.719554046 | 0.010589317 | 0.038124059 |



|                 |              |             |             |
|-----------------|--------------|-------------|-------------|
| FER1L4          | -5.721927059 | 9.73E-05    | 0.001040309 |
| PPIL6           | -5.722445594 | 4.80E-06    | 8.97E-05    |
| RELL1           | -5.723622435 | 0.001987127 | 0.010452925 |
| FAM86EP         | -5.72487705  | 0.005464317 | 0.023077491 |
| ALG12           | -5.727529328 | 0.004411094 | 0.019507445 |
| MPC2            | -5.728293853 | 0.005795528 | 0.024015431 |
| DBF4            | -5.729262003 | 0.001739182 | 0.009401991 |
| UBXN2A          | -5.72935795  | 0.000644278 | 0.004403351 |
| TIRAP           | -5.729390215 | 0.000718942 | 0.004781362 |
| AQP4            | -5.729577886 | 0.02043522  | 0.062794594 |
| MSH5            | -5.733153482 | 0.002619048 | 0.012933483 |
| AMPD2           | -5.733158598 | 0.000196907 | 0.001778626 |
| GAS7            | -5.733266915 | 4.71E-05    | 0.00059682  |
| ZBTB7C          | -5.73329162  | 2.79E-05    | 0.000398257 |
| ENSG00000255508 | -5.734583731 | 0.001007949 | 0.006202445 |
| ENSG00000262302 | -5.735498446 | 0.019365339 | 0.060334123 |
| ENSG00000229180 | -5.738467713 | 4.30E-08    | 1.36E-06    |
| SNRNP40         | -5.740664024 | 0.000334889 | 0.002670291 |
| DKK3            | -5.741654176 | 0.000225559 | 0.001984133 |
| CRYGN           | -5.743451525 | 0.0015431   | 0.008611196 |
| ASAH2           | -5.743535707 | 0.008689535 | 0.032714817 |
| CLN6            | -5.74402619  | 3.51E-05    | 0.000475231 |
| IQCG            | -5.744276528 | 0.002136501 | 0.011041933 |
| SYNPO           | -5.744326106 | 5.24E-06    | 9.72E-05    |
| SUPT3H          | -5.744461358 | 0.000207389 | 0.001856688 |
| PLCD4           | -5.744574221 | 0.001298888 | 0.00756111  |
| GNRHR2          | -5.745891793 | 0.000868627 | 0.005534148 |
| CCDC91          | -5.746251015 | 6.82E-05    | 0.000804835 |
| HNRNP70         | -5.746968154 | 0.000403637 | 0.003047693 |
| GOLT1B          | -5.747914661 | 0.0053121   | 0.022552668 |
| ESR1            | -5.749049228 | 0.00488229  | 0.021150766 |
| SPINDOC         | -5.749370826 | 0.001273923 | 0.007445466 |
| PDE7B           | -5.749380837 | 0.001481925 | 0.008354552 |
| ALAD            | -5.74955003  | 0.001409897 | 0.008063531 |
| RUBCNL          | -5.750843859 | 0.003738979 | 0.01706485  |
| TMEM106A        | -5.751014987 | 5.94E-05    | 0.000721565 |
| HADH            | -5.751425802 | 0.005376168 | 0.022776736 |
| HOMEZ           | -5.751883954 | 6.37E-05    | 0.000761617 |
| PPP2CB          | -5.752061791 | 2.57E-05    | 0.000372677 |
| PPP3CA          | -5.753688823 | 3.59E-05    | 0.000482658 |
| FN3KRP          | -5.753940912 | 0.003728634 | 0.017042129 |
| IGKV2D-29       | -5.754209726 | 0.019525927 | 0.060678261 |
| PNPLA4          | -5.754906494 | 0.001717851 | 0.009307462 |
| TP53INP1        | -5.756288748 | 4.30E-06    | 8.11E-05    |

|                 |              |             |             |
|-----------------|--------------|-------------|-------------|
| PCDHA10         | -5.757318414 | 0.00094423  | 0.005906441 |
| ARL16           | -5.757393247 | 6.15E-05    | 0.000740657 |
| ZNF600          | -5.757552459 | 0.000336218 | 0.002675089 |
| SCAPER          | -5.757650314 | 5.39E-06    | 9.94E-05    |
| CEP290          | -5.75903998  | 0.019966621 | 0.06168521  |
| MPZL1           | -5.759416996 | 0.00043155  | 0.003206431 |
| VWDE            | -5.760285513 | 7.09E-05    | 0.000826794 |
| ENSG00000268400 | -5.76113752  | 0.004269537 | 0.019006429 |
| DUSP10          | -5.761626521 | 0.004922073 | 0.021285018 |
| EML5            | -5.761637605 | 0.000202391 | 0.001818666 |
| JAML            | -5.762021027 | 0.019115685 | 0.059681755 |
| PDLIM4          | -5.76214719  | 9.61E-06    | 0.000162279 |
| HSPA9           | -5.76327645  | 3.24E-05    | 0.000444277 |
| ALDH3B1         | -5.763544923 | 0.001198163 | 0.007116079 |
| ENSG00000254509 | -5.76420905  | 0.001093945 | 0.006604047 |
| TENT4B          | -5.764264993 | 0.003155395 | 0.014971353 |
| SELENOI         | -5.764412249 | 0.003292728 | 0.015477739 |
| GCOM1           | -5.765264866 | 0.004762381 | 0.020690547 |
| ZP3             | -5.767006851 | 0.002240244 | 0.011475209 |
| PEG10           | -5.767179633 | 0.001442089 | 0.008197213 |
| METTL5          | -5.768178878 | 0.001187811 | 0.007071944 |
| TMEM184C        | -5.770263967 | 0.000152015 | 0.001471893 |
| CSNK1G2         | -5.773291198 | 1.36E-06    | 2.97E-05    |
| FAM13C          | -5.773303895 | 0.000810325 | 0.005236611 |
| RABEP2          | -5.773687025 | 0.000747797 | 0.004927238 |
| AOX1            | -5.77540175  | 0.008696518 | 0.032730924 |
| DCAF12          | -5.777617038 | 0.000464541 | 0.003397468 |
| ARMH3           | -5.778233676 | 0.009271581 | 0.03446659  |
| C2orf88         | -5.778298351 | 0.002056483 | 0.010701494 |
| ZFHX4           | -5.778634478 | 0.001907524 | 0.010138374 |
| CAB39L          | -5.779441992 | 0.001457475 | 0.008247444 |
| LSP1            | -5.782584984 | 0.002186938 | 0.011268924 |
| MTMR7           | -5.782928678 | 0.003998078 | 0.017989865 |
| SLC9A3R1        | -5.783152278 | 0.0015117   | 0.008475041 |
| ENO2            | -5.785653404 | 2.00E-05    | 0.000301839 |
| TMEM170A        | -5.787455396 | 3.04E-05    | 0.000425693 |
| TLK2P2          | -5.787568472 | 4.12E-07    | 1.07E-05    |
| ZNF473          | -5.787873581 | 0.000663295 | 0.004502644 |
| SLC9A7          | -5.788523312 | 8.02E-05    | 0.000908315 |
| PPT1            | -5.789005184 | 0.008561996 | 0.032395875 |
| YPEL3           | -5.789487684 | 8.55E-05    | 0.000949284 |
| SYS1            | -5.79045043  | 0.001080719 | 0.006547059 |
| SLC25A14        | -5.79631356  | 0.001415493 | 0.008077851 |
| ARPC4-TTLL3     | -5.797114102 | 0.004444521 | 0.019619431 |

|           |              |             |             |
|-----------|--------------|-------------|-------------|
| CEP164P1  | -5.799985072 | 0.003208148 | 0.015180384 |
| OLFM1     | -5.800743009 | 0.010327507 | 0.037415535 |
| FAM90A25P | -5.800763455 | 0.002135076 | 0.011041933 |
| COPS3     | -5.800841565 | 0.000399862 | 0.00302118  |
| LGI3      | -5.800942853 | 0.001231139 | 0.007269127 |
| RBM27     | -5.801034829 | 0.00860817  | 0.032513805 |
| PLA2G4B   | -5.802308505 | 0.000574459 | 0.004016898 |
| TAMM41    | -5.802877835 | 0.000189248 | 0.001726195 |
| ATP1A2    | -5.803770649 | 0.008422114 | 0.032016731 |
| PTBP3     | -5.804196022 | 8.26E-08    | 2.45E-06    |
| PSMD3     | -5.807263989 | 1.88E-05    | 0.000286903 |
| GFER      | -5.8074481   | 0.000424396 | 0.003167012 |
| RNF103    | -5.807597715 | 0.00078693  | 0.005137541 |
| DZIP1     | -5.807802015 | 0.001614361 | 0.008880007 |
| PPA1      | -5.808342884 | 6.10E-05    | 0.000735842 |
| UGGT2     | -5.808548275 | 1.16E-06    | 2.62E-05    |
| STN1      | -5.808752143 | 0.000977197 | 0.006071863 |
| PGM1      | -5.809659743 | 0.000175707 | 0.001627721 |
| TREX1     | -5.809799171 | 0.018497691 | 0.058321452 |
| EHMT2     | -5.811268872 | 0.002389788 | 0.012077658 |
| STRC      | -5.811405389 | 0.001212418 | 0.007179604 |
| SLC35B4   | -5.813383179 | 0.003354522 | 0.015707207 |
| MRPS33    | -5.814686877 | 0.000163063 | 0.001541967 |
| TRDC      | -5.814762547 | 0.00349531  | 0.016203458 |
| TTBK2     | -5.814889767 | 0.001666232 | 0.009106907 |
| STC1      | -5.815221562 | 0.000191091 | 0.001739068 |
| SWT1      | -5.81539607  | 0.003220034 | 0.015206902 |
| CCND3     | -5.815442856 | 2.07E-05    | 0.000310908 |
| DPAGT1    | -5.815508144 | 8.32E-05    | 0.00093206  |
| BABAM2    | -5.815607676 | 0.000154949 | 0.001490585 |
| ZNF124    | -5.81574277  | 6.03E-05    | 0.000730367 |
| USP20     | -5.820807147 | 2.00E-05    | 0.000301839 |
| SFMBT2    | -5.821504496 | 7.34E-05    | 0.000851051 |
| ABI1      | -5.82217425  | 0.000756365 | 0.004970165 |
| ZNF385A   | -5.822423581 | 1.15E-05    | 0.000189135 |
| SLC40A1   | -5.823561285 | 0.000662875 | 0.004502494 |
| NMD3      | -5.824311758 | 0.000489282 | 0.00353357  |
| POLR1G    | -5.825627836 | 0.001493462 | 0.008411753 |
| DHRS4     | -5.825951874 | 0.010184132 | 0.037018869 |
| TUFT1     | -5.827596959 | 0.000878373 | 0.005579402 |
| ZC3HC1    | -5.828864947 | 0.000284687 | 0.002365029 |
| GPX8      | -5.829020585 | 0.005137313 | 0.021980219 |
| TMOD1     | -5.829530881 | 0.00825225  | 0.031549348 |
| MOB1B     | -5.829565397 | 0.000558422 | 0.003925167 |

|                 |              |             |             |
|-----------------|--------------|-------------|-------------|
| CNIH1           | -5.83159474  | 0.000804541 | 0.005213151 |
| ZBTB41          | -5.831838088 | 1.31E-05    | 0.000213167 |
| XPA             | -5.832235661 | 8.06E-05    | 0.000911037 |
| ENSG00000285155 | -5.832494389 | 0.005960598 | 0.024556529 |
| IGLV3-1         | -5.834211498 | 0.009473307 | 0.035076449 |
| MGST1           | -5.835880959 | 5.68E-06    | 0.000103617 |
| PLCB1           | -5.837046013 | 9.42E-05    | 0.00101587  |
| ATP8B1          | -5.837862486 | 0.001983378 | 0.010443554 |
| FCGBP           | -5.839278803 | 0.008609282 | 0.032513805 |
| RAVER1          | -5.840057482 | 4.11E-08    | 1.31E-06    |
| IGLC2           | -5.840845768 | 0.000370106 | 0.002847908 |
| RNF34           | -5.841615497 | 0.000534899 | 0.003799004 |
| ENSG00000276805 | -5.84161919  | 8.95E-07    | 2.07E-05    |
| DGCR6           | -5.841732696 | 0.00491872  | 0.021278122 |
| MRPS35          | -5.841993143 | 0.00063806  | 0.004371298 |
| CR1             | -5.842315626 | 0.009154004 | 0.03413434  |
| ASCC1           | -5.842933814 | 8.87E-05    | 0.000975603 |
| CLCN4           | -5.844533581 | 0.000745335 | 0.00491935  |
| ZNF862          | -5.847548743 | 0.003181159 | 0.015064456 |
| RYKP1           | -5.849242654 | 2.29E-06    | 4.66E-05    |
| SLC2A1          | -5.850308548 | 3.63E-05    | 0.000486148 |
| ADSS2           | -5.850561863 | 0.000207579 | 0.001857013 |
| COQ9            | -5.851535598 | 0.000270937 | 0.002277374 |
| PFDN1           | -5.851860694 | 2.57E-05    | 0.000372677 |
| MRPS11          | -5.853350203 | 0.002903256 | 0.01403395  |
| KCNMB3          | -5.853445002 | 0.003741747 | 0.01706485  |
| AVIL            | -5.853497619 | 0.000638143 | 0.004371298 |
| BEX2            | -5.85380163  | 0.003004082 | 0.014446329 |
| CPED1           | -5.854932296 | 0.004427893 | 0.019574588 |
| PRPF31          | -5.855555503 | 0.047045993 | 0.116977135 |
| TBC1D3B         | -5.859227431 | 0.000214534 | 0.00190655  |
| IL17RE          | -5.860488548 | 0.000420411 | 0.003145028 |
| ZNF85           | -5.861231768 | 0.003501543 | 0.016226141 |
| PDXDC2P         | -5.861992957 | 0.000247358 | 0.002130973 |
| FGD2            | -5.862519243 | 0.000250399 | 0.002146482 |
| BOLA2B          | -5.865562486 | 0.007847077 | 0.030345374 |
| PIH1D1          | -5.868027469 | 0.000176397 | 0.00163235  |
| CDC40           | -5.86821443  | 0.000732011 | 0.004849623 |
| CCL3            | -5.869082669 | 0.009019651 | 0.033742516 |
| SNX12           | -5.872134889 | 3.16E-05    | 0.000438339 |
| FRRS1           | -5.877089209 | 0.00012129  | 0.001234731 |
| MYL9            | -5.877126156 | 0.000108661 | 0.001128953 |
| JADE2           | -5.878757692 | 2.30E-05    | 0.000341799 |
| ENSG00000256029 | -5.880199374 | 0.009211098 | 0.034336657 |

|                 |              |             |             |
|-----------------|--------------|-------------|-------------|
| TRIM27          | -5.880859947 | 0.000323465 | 0.00260667  |
| NCKAP1L         | -5.88105785  | 0.00110249  | 0.006645689 |
| MAN2B2          | -5.882897458 | 3.25E-06    | 6.35E-05    |
| FAM98B          | -5.885600407 | 6.10E-06    | 0.000110921 |
| MDM1            | -5.885840314 | 0.000430932 | 0.003203933 |
| NRF1            | -5.88647268  | 0.000104151 | 0.001090526 |
| ENSG00000267228 | -5.887150935 | 0.003261318 | 0.015353945 |
| WRAP73          | -5.887159502 | 0.005073439 | 0.021760773 |
| CDKN2AIP        | -5.887180591 | 0.000237655 | 0.002067855 |
| PYGL            | -5.888138268 | 0.00124771  | 0.007338331 |
| LMNB1           | -5.888173602 | 0.003997403 | 0.017989865 |
| LMBRD2          | -5.888762788 | 0.001646379 | 0.00900894  |
| HLA-DRB3        | -5.888782714 | 0.018419351 | 0.058135027 |
| OXCT2P1         | -5.889656425 | 0.008383596 | 0.031929099 |
| NAA20           | -5.889830944 | 6.59E-05    | 0.000784981 |
| ARHGAP24        | -5.892340071 | 7.10E-06    | 0.000125868 |
| VAMP8           | -5.895525353 | 0.006474919 | 0.026141569 |
| FAM234A         | -5.896880156 | 5.27E-05    | 0.000652077 |
| GTF2A2          | -5.898284983 | 0.000304523 | 0.002487142 |
| GJA1P1          | -5.898410348 | 0.000170607 | 0.001598317 |
| RPUSD3          | -5.900136291 | 9.90E-07    | 2.27E-05    |
| PTGES2          | -5.90021009  | 0.000245112 | 0.002116144 |
| ENSG00000267022 | -5.901108277 | 0.000932218 | 0.005846407 |
| PRPF38B         | -5.901973103 | 0.000501072 | 0.003599393 |
| TMEM50A         | -5.905188914 | 0.000368235 | 0.002837117 |
| TMEM199         | -5.906308372 | 0.003111863 | 0.014805816 |
| LYSMD3          | -5.907285973 | 0.000171278 | 0.001601252 |
| ODF2            | -5.907338576 | 0.000266538 | 0.00225292  |
| BACE2           | -5.90768061  | 2.33E-05    | 0.000343272 |
| JPT2            | -5.909491718 | 7.12E-05    | 0.000828792 |
| SDSL            | -5.909685902 | 1.54E-05    | 0.00024183  |
| DCK             | -5.909801893 | 0.002254263 | 0.011508055 |
| ARL14EP         | -5.912075677 | 0.001903619 | 0.01012809  |
| AATK            | -5.912318639 | 0.000517034 | 0.003685123 |
| PPM1D           | -5.912790141 | 0.000632682 | 0.004346186 |
| IGKV3-20        | -5.913173606 | 0.002327604 | 0.011822627 |
| ENSG00000267645 | -5.913610845 | 0.003697985 | 0.016948279 |
| CLPB            | -5.913617087 | 6.35E-05    | 0.000761257 |
| C11orf58        | -5.91436107  | 1.52E-06    | 3.29E-05    |
| ADAMTSL1        | -5.914492805 | 0.000347881 | 0.002731085 |
| RSU1            | -5.914806625 | 0.000786616 | 0.005137541 |
| WDFY4           | -5.91591479  | 0.00126168  | 0.007391758 |
| RB1             | -5.916888527 | 0.000100336 | 0.001060674 |
| KIAA1191        | -5.919024034 | 4.18E-11    | 1.90E-09    |

|                 |              |             |             |
|-----------------|--------------|-------------|-------------|
| PGM2            | -5.920415524 | 0.002511629 | 0.012541568 |
| METTL25         | -5.920660116 | 0.000748612 | 0.004927243 |
| NFASC           | -5.922498634 | 2.96E-05    | 0.000416749 |
| LRP12           | -5.923305873 | 1.44E-05    | 0.000228072 |
| VAMP4           | -5.923444062 | 3.36E-05    | 0.000458753 |
| ARHGAP26        | -5.923582401 | 7.41E-06    | 0.000130517 |
| LRGUK           | -5.92497018  | 0.008219772 | 0.031454984 |
| IKZF3           | -5.926591658 | 0.008062751 | 0.030991278 |
| THAP3           | -5.927762805 | 0.0013019   | 0.007568778 |
| KRI1            | -5.928277087 | 5.92E-06    | 0.000107679 |
| PCDHGB2         | -5.928503711 | 0.001319952 | 0.007637044 |
| TSPOAP1         | -5.929172666 | 0.000392114 | 0.002971916 |
| VAR51           | -5.933654421 | 9.18E-05    | 0.001001142 |
| RTL8C           | -5.934425234 | 0.000297634 | 0.002440759 |
| AGER            | -5.93515299  | 5.06E-06    | 9.39E-05    |
| ZMAT2           | -5.936109247 | 0.002005453 | 0.010506709 |
| TAS2R30         | -5.937919019 | 0.006843478 | 0.027310733 |
| EGFLAM          | -5.938641532 | 0.001150944 | 0.006889727 |
| FAM50A          | -5.939649469 | 0.000898119 | 0.005674182 |
| DNAJC8          | -5.939689064 | 8.40E-06    | 0.000145063 |
| ZBTB22          | -5.940140187 | 0.000958341 | 0.005979256 |
| TAMALIN         | -5.940503172 | 0.004388625 | 0.019436485 |
| SOCS6           | -5.94098244  | 0.000265113 | 0.002244302 |
| SLIRP           | -5.942753086 | 0.000300021 | 0.002455342 |
| SPOUT1          | -5.943156444 | 0.000272494 | 0.002287287 |
| RAMP3           | -5.944763536 | 0.00733731  | 0.028815966 |
| ERH             | -5.945259623 | 0.000139497 | 0.001378348 |
| SRPX2           | -5.945801894 | 0.001511359 | 0.008475041 |
| ENSG00000255330 | -5.945931092 | 0.001759121 | 0.009488593 |
| TSG101          | -5.946279625 | 0.001168488 | 0.006984387 |
| PRKCE           | -5.947524731 | 0.001022735 | 0.006274295 |
| XAF1            | -5.947746582 | 0.00010958  | 0.001134602 |
| TAF4            | -5.949089516 | 0.000660283 | 0.004489925 |
| TUFM            | -5.949466501 | 0.000387395 | 0.002946535 |
| HEXD            | -5.95015678  | 0.000258524 | 0.002199002 |
| MOSPD2          | -5.950403852 | 0.000243734 | 0.002109175 |
| FBXO16          | -5.95109269  | 0.003055944 | 0.014620217 |
| VASP            | -5.951380836 | 3.85E-05    | 0.00050883  |
| SFT2D2          | -5.952409136 | 0.000212559 | 0.001894563 |
| FLOT1           | -5.963398904 | 0.000941712 | 0.005893735 |
| JPH1            | -5.965464928 | 0.00082917  | 0.005322208 |
| CD82            | -5.967293117 | 2.08E-06    | 4.32E-05    |
| ATP5MJ          | -5.96765066  | 6.88E-05    | 0.000808191 |
| CNKSR3          | -5.968493427 | 0.000892035 | 0.005647066 |

|                 |              |             |             |
|-----------------|--------------|-------------|-------------|
| DIPK2A          | -5.968642519 | 0.000332351 | 0.0026553   |
| ZNF550          | -5.968705076 | 1.58E-05    | 0.000247231 |
| DNMT3B          | -5.970607233 | 0.000324575 | 0.002613878 |
| ENY2            | -5.970832781 | 0.000639298 | 0.00437673  |
| ABHD16A         | -5.97371037  | 0.000806835 | 0.005219656 |
| GSDME           | -5.973824731 | 0.003533779 | 0.01634897  |
| SP140           | -5.97459237  | 0.001613458 | 0.008880007 |
| RPS6KL1         | -5.975076299 | 0.002409568 | 0.012132034 |
| APH1B           | -5.975914323 | 2.75E-05    | 0.000393897 |
| ERMAP           | -5.978325476 | 0.003162669 | 0.014988622 |
| SEC22A          | -5.978924494 | 0.000981436 | 0.006084019 |
| SLC22A17        | -5.980506086 | 0.000175563 | 0.001627721 |
| BCAT2           | -5.98096618  | 4.04E-05    | 0.000527553 |
| FGR             | -5.982498958 | 0.003487245 | 0.016172265 |
| GOLGA8Q         | -5.985401972 | 0.002008991 | 0.010513099 |
| OSTM1           | -5.988984255 | 0.000414295 | 0.003106954 |
| KLHDC1          | -5.989202591 | 0.00086073  | 0.005491976 |
| USP30           | -5.989804428 | 0.002222713 | 0.011404712 |
| KCTD18          | -5.989955703 | 3.00E-05    | 0.000420067 |
| FAM118A         | -5.99084507  | 0.000616629 | 0.004255229 |
| RRAS2           | -5.991994636 | 0.000616368 | 0.004255229 |
| INPP5F          | -5.993113838 | 0.008509982 | 0.032268153 |
| TRAP1           | -5.994398618 | 7.83E-07    | 1.87E-05    |
| BCL6            | -5.997570219 | 0.000267838 | 0.002259172 |
| ITGA4           | -5.998555331 | 0.000705923 | 0.004715506 |
| ADAMTS3         | -5.999323264 | 0.0013652   | 0.007852952 |
| SV2A            | -6.000073965 | 0.0010395   | 0.006354601 |
| PYGM            | -6.000542715 | 0.004308568 | 0.019166082 |
| COX6C           | -6.000852926 | 4.24E-05    | 0.000547641 |
| NDUFS6          | -6.004037653 | 0.000200367 | 0.001805842 |
| BOD1L1          | -6.004329294 | 0.000194287 | 0.001759615 |
| TRIM44          | -6.004802835 | 0.002482017 | 0.012439887 |
| ADAM28          | -6.006046621 | 0.003105613 | 0.01479352  |
| PCOLCE          | -6.006948225 | 6.83E-09    | 2.53E-07    |
| CTDP1           | -6.007262713 | 0.001235124 | 0.007285543 |
| HLA-DQB1        | -6.009693636 | 0.00374982  | 0.017082356 |
| ENSG00000254704 | -6.010067663 | 0.000969091 | 0.00603389  |
| STX7            | -6.013988205 | 1.68E-05    | 0.000260355 |
| SLC16A9         | -6.013991573 | 1.39E-05    | 0.000222235 |
| PIGP            | -6.015391216 | 7.31E-07    | 1.77E-05    |
| TANC2           | -6.017469868 | 2.40E-06    | 4.87E-05    |
| PYROXD1         | -6.018542106 | 0.000369357 | 0.002843958 |
| TRMT112         | -6.018668107 | 2.08E-05    | 0.000312218 |
| PKIG            | -6.019399271 | 1.81E-05    | 0.000277786 |

|                 |              |             |             |
|-----------------|--------------|-------------|-------------|
| TFB1M           | -6.020149243 | 0.000471128 | 0.00342906  |
| MRRF            | -6.020181257 | 0.001017141 | 0.00624976  |
| ZNF772          | -6.020240174 | 9.35E-06    | 0.000158949 |
| ELOVL7          | -6.023296893 | 0.001418455 | 0.008090942 |
| MTRF1L          | -6.024247704 | 0.000245473 | 0.002117751 |
| PIGA            | -6.024271241 | 8.05E-07    | 1.89E-05    |
| SELE            | -6.024700441 | 0.008514911 | 0.032268153 |
| RPL12           | -6.025189755 | 2.24E-06    | 4.59E-05    |
| RAB8B           | -6.025203496 | 0.000643099 | 0.004400267 |
| SERPINB8        | -6.025652462 | 4.86E-05    | 0.000611539 |
| DHX36           | -6.026837326 | 0.006218406 | 0.025325566 |
| TAF6L           | -6.027434961 | 0.003147914 | 0.014942099 |
| DBF4B           | -6.028221626 | 0.001343141 | 0.007756381 |
| DNAJC7          | -6.02931791  | 0.003691376 | 0.016924398 |
| ARHGEF16        | -6.029953218 | 1.96E-05    | 0.000297347 |
| TCF3            | -6.03119494  | 0.000307019 | 0.00250415  |
| TTC5            | -6.031894417 | 0.000390798 | 0.002967513 |
| QPCT            | -6.032713304 | 0.002863713 | 0.013881611 |
| S100A14         | -6.033093057 | 4.12E-07    | 1.07E-05    |
| HERC2P4         | -6.035043162 | 0.002950966 | 0.014230475 |
| GPN2            | -6.040452092 | 0.001017187 | 0.00624976  |
| TOMM40          | -6.042609377 | 0.000193591 | 0.001755229 |
| CEP170          | -6.042955618 | 0.00617902  | 0.025199076 |
| GABRE           | -6.044311758 | 1.50E-05    | 0.000236267 |
| ENSG00000250848 | -6.044557893 | 0.000889683 | 0.005636997 |
| WDR17           | -6.044563186 | 3.09E-05    | 0.000430693 |
| DPP6            | -6.046523175 | 0.003407436 | 0.015911885 |
| DAGLB           | -6.047809773 | 0.000576382 | 0.004023374 |
| IMPA1           | -6.047827834 | 0.00016749  | 0.001575216 |
| SLC5A6          | -6.049258157 | 0.000769473 | 0.005037155 |
| H2BP1           | -6.049516901 | 0.008244573 | 0.031529957 |
| LRRC51          | -6.049816697 | 5.95E-05    | 0.000722275 |
| ANK2            | -6.050684139 | 0.002020817 | 0.010560407 |
| XYLT2           | -6.05096229  | 1.72E-05    | 0.000264453 |
| NPAS3           | -6.05119447  | 0.00071158  | 0.004745432 |
| AP3M2           | -6.051466604 | 0.000276238 | 0.002307509 |
| NTRK3           | -6.053469925 | 0.000350094 | 0.002742742 |
| IL7R            | -6.053746631 | 0.006870503 | 0.02738247  |
| PDZD11          | -6.055874736 | 0.002401661 | 0.012115876 |
| BACH2           | -6.05647105  | 0.003140975 | 0.014916279 |
| EMC8            | -6.057589995 | 4.30E-05    | 0.000554157 |
| ZNF763          | -6.05780791  | 0.00339449  | 0.015857546 |
| MRPL49          | -6.057903808 | 0.001046827 | 0.006377474 |
| RDH14           | -6.058320091 | 0.00071262  | 0.004749752 |



|                 |              |             |             |
|-----------------|--------------|-------------|-------------|
| ZBTB37          | -6.059543401 | 9.05E-06    | 0.000154487 |
| ENSG00000206356 | -6.064420804 | 0.000634404 | 0.004352433 |
| CYB5D2          | -6.067463848 | 8.83E-05    | 0.000973601 |
| POLR1D          | -6.068352747 | 9.08E-05    | 0.000993261 |
| MS4A7           | -6.068825482 | 0.000160652 | 0.001524042 |
| VPS50           | -6.070168309 | 3.60E-05    | 0.000483127 |
| DNAJB5          | -6.07034128  | 7.15E-05    | 0.000831871 |
| CBFB            | -6.071478004 | 0.000257474 | 0.002193151 |
| ZNF257          | -6.073049135 | 0.002521838 | 0.01256947  |
| TP53I11         | -6.0745199   | 0.000232635 | 0.002033079 |
| EXOC1           | -6.07453526  | 5.13E-08    | 1.60E-06    |
| FKBP11          | -6.075885807 | 1.24E-07    | 3.58E-06    |
| GASK1B          | -6.07597445  | 0.000761647 | 0.004994029 |
| ENGASE          | -6.076609833 | 1.06E-05    | 0.000176691 |
| EDEM2           | -6.076898413 | 0.001143279 | 0.00685401  |
| ENSG00000274559 | -6.080101087 | 0.001981237 | 0.010440094 |
| DHRS7B          | -6.080316256 | 4.65E-05    | 0.000591128 |
| JRK             | -6.083444353 | 1.67E-05    | 0.000259918 |
| AP3S1           | -6.084608219 | 9.20E-05    | 0.001002452 |
| SQLE            | -6.084995072 | 0.000191007 | 0.001739068 |
| GALM            | -6.085995829 | 0.000615797 | 0.004254342 |
| FBXW4           | -6.087578664 | 6.50E-05    | 0.000774578 |
| B4GALT3         | -6.089004044 | 0.000104366 | 0.001091764 |
| RASA4B          | -6.091502971 | 0.000304795 | 0.00248769  |
| OR7E13P         | -6.092046232 | 0.002597981 | 0.012866594 |
| ABCB7           | -6.092904987 | 1.10E-05    | 0.000181766 |
| TIMM21          | -6.094248045 | 0.000695081 | 0.004668845 |
| MXRA7P1         | -6.096387148 | 1.42E-05    | 0.000227521 |
| ZSWIM4          | -6.09932109  | 6.32E-05    | 0.000759003 |
| CAMK2G          | -6.100137947 | 4.78E-05    | 0.000603903 |
| SCN3A           | -6.100455375 | 0.000378335 | 0.00289467  |
| MPV17L          | -6.101363531 | 0.000333088 | 0.002657677 |
| ARMCX6          | -6.101474165 | 4.82E-05    | 0.000607941 |
| DUS2            | -6.1037624   | 4.65E-05    | 0.000591128 |
| FOXP1           | -6.10456089  | 6.10E-05    | 0.000735994 |
| GATAD1          | -6.105886813 | 0.000462857 | 0.003387193 |
| KATNB1          | -6.10608138  | 0.002474404 | 0.012406869 |
| NBPF3           | -6.111078516 | 0.001104291 | 0.006653229 |
| RPS6KA4         | -6.111882857 | 2.92E-05    | 0.000411979 |
| APOLD1          | -6.112880798 | 0.007358339 | 0.028861093 |
| MRPL9           | -6.113038507 | 3.00E-05    | 0.000420067 |
| GRB7            | -6.113886242 | 0.000651364 | 0.004436753 |
| PPP2R2D         | -6.113918831 | 0.000119785 | 0.001222498 |
| POLR2M          | -6.114977342 | 0.00023786  | 0.002067855 |

|          |              |             |             |
|----------|--------------|-------------|-------------|
| SDHAF2   | -6.115086658 | 0.016956469 | 0.054498714 |
| NEDD8    | -6.116566272 | 0.00017132  | 0.001601252 |
| IGLC1    | -6.11727111  | 0.000539799 | 0.003825368 |
| GLI3     | -6.120366757 | 9.94E-05    | 0.001054911 |
| TPH1     | -6.124417005 | 2.57E-05    | 0.000372677 |
| PLEKHH3  | -6.125815324 | 9.18E-07    | 2.11E-05    |
| SPTLC1   | -6.126437385 | 3.55E-05    | 0.000479091 |
| ZNF286A  | -6.126690103 | 0.000101718 | 0.001073091 |
| CAPZA1P2 | -6.127253103 | 0.000214717 | 0.001906772 |
| NDFIP2   | -6.128583007 | 0.006007102 | 0.024714715 |
| PTAR1    | -6.128974186 | 4.36E-05    | 0.000559509 |
| TMEM164  | -6.129456048 | 0.00399263  | 0.017989865 |
| DDX19B   | -6.130193848 | 3.95E-05    | 0.00051805  |
| TMEM132B | -6.131252502 | 0.000231374 | 0.002023521 |
| ALG11    | -6.132951841 | 2.96E-05    | 0.000416749 |
| PIGK     | -6.134952532 | 8.34E-06    | 0.000144154 |
| TSTD2    | -6.135594216 | 0.00028896  | 0.002392318 |
| CLIP3    | -6.13676277  | 0.002097997 | 0.010880102 |
| VPS11    | -6.137307236 | 0.001507376 | 0.008462559 |
| UFSP2    | -6.139148542 | 8.17E-05    | 0.000920174 |
| DNPEP    | -6.140898727 | 1.95E-05    | 0.000296871 |
| FYCO1    | -6.144197781 | 0.005703254 | 0.023743574 |
| PLVAP    | -6.144865129 | 1.37E-05    | 0.000219865 |
| PCYT1A   | -6.14589255  | 1.15E-07    | 3.36E-06    |
| CDK2     | -6.146335845 | 1.42E-07    | 4.02E-06    |
| COMMD6   | -6.148681421 | 1.67E-06    | 3.57E-05    |
| TMEM183A | -6.150684657 | 0.00012985  | 0.001305403 |
| PARVB    | -6.151006308 | 0.000159846 | 0.001522244 |
| PLCL2    | -6.151131009 | 0.000193273 | 0.001753824 |
| RGS1     | -6.151783629 | 0.006570566 | 0.02644833  |
| CAPN5    | -6.15248385  | 0.000366261 | 0.002825505 |
| DDX54    | -6.152518041 | 1.17E-06    | 2.63E-05    |
| TUBG1P   | -6.152524318 | 0.000109315 | 0.001133808 |
| PDE4B    | -6.15309524  | 1.13E-06    | 2.55E-05    |
| PRPF40A  | -6.154431324 | 0.000162805 | 0.001540731 |
| ALOX15B  | -6.156449782 | 0.000182027 | 0.001674203 |
| GTF2E1   | -6.160491395 | 0.00067655  | 0.004572283 |
| TM4SF1   | -6.163751026 | 5.88E-05    | 0.000716198 |
| AGPAT1   | -6.164930988 | 1.84E-07    | 5.16E-06    |
| SDHD     | -6.169649761 | 0.000236061 | 0.002057434 |
| ARMC2    | -6.170253014 | 0.001057662 | 0.006433133 |
| P4HA1    | -6.171668241 | 0.00010445  | 0.001091764 |
| B3GALNT1 | -6.173585423 | 4.65E-05    | 0.000591128 |
| GMEB1    | -6.175294272 | 8.98E-05    | 0.000985148 |

|                 |              |             |             |
|-----------------|--------------|-------------|-------------|
| ATP6V0A2        | -6.176712118 | 8.25E-07    | 1.92E-05    |
| GKAP1           | -6.180400169 | 0.000514763 | 0.00367159  |
| LYN             | -6.180760739 | 0.001257758 | 0.007375924 |
| STK38L          | -6.182671276 | 1.55E-08    | 5.40E-07    |
| ENSG00000255730 | -6.183233028 | 0.005917028 | 0.024410263 |
| SPOCK2          | -6.187835018 | 0.000212816 | 0.001895455 |
| CRISPLD2        | -6.188376214 | 2.31E-05    | 0.000342208 |
| AMACR           | -6.189644345 | 0.00014076  | 0.001387421 |
| FBXL6           | -6.190309727 | 0.000553716 | 0.003898885 |
| ZNF500          | -6.191778762 | 4.88E-05    | 0.000613241 |
| NCAPG2          | -6.19182603  | 0.000251743 | 0.002153427 |
| TOPBP1          | -6.193040396 | 0.002709869 | 0.01327408  |
| ZNF267          | -6.193101998 | 0.000694839 | 0.004668845 |
| MAGT1           | -6.193760586 | 1.39E-05    | 0.00022228  |
| RPRD1B          | -6.193824695 | 0.00013321  | 0.001328153 |
| CSTF1           | -6.194537129 | 9.79E-05    | 0.00104454  |
| NUDCD1          | -6.194734805 | 0.000146783 | 0.001433953 |
| ARMC10          | -6.196421042 | 5.21E-05    | 0.0006467   |
| TMEM62          | -6.199001343 | 0.000676061 | 0.004571531 |
| ECM2            | -6.199536227 | 9.44E-05    | 0.001016584 |
| NEB             | -6.199711978 | 0.000736723 | 0.004878172 |
| SLC7A7          | -6.201100336 | 2.27E-06    | 4.63E-05    |
| WDFY1           | -6.201998898 | 0.000102181 | 0.001076413 |
| LCA5            | -6.204343175 | 0.000257919 | 0.002195392 |
| DHRS12          | -6.20502947  | 0.002877849 | 0.013933392 |
| FRS3            | -6.206040176 | 8.04E-05    | 0.000909011 |
| RWDD2B          | -6.206110313 | 0.000886994 | 0.005629874 |
| ZNF559-ZNF177   | -6.207365025 | 0.000742509 | 0.004911109 |
| SH3BP1          | -6.207393954 | 0.002839127 | 0.013790044 |
| TXNRD2          | -6.207579848 | 0.000797366 | 0.005186094 |
| NDUFAF4         | -6.210611811 | 0.00195616  | 0.010339457 |
| TSPAN12         | -6.212387742 | 0.000584912 | 0.004071176 |
| SNRPF           | -6.213046869 | 0.000863358 | 0.005505843 |
| HARS1           | -6.215707884 | 4.30E-05    | 0.000554052 |
| CDK5RAP1        | -6.217609349 | 7.44E-05    | 0.000858919 |
| SLBP            | -6.218634666 | 2.55E-05    | 0.000370721 |
| NEU1            | -6.220687182 | 3.83E-06    | 7.31E-05    |
| GABPB2          | -6.223717    | 0.000403875 | 0.003047693 |
| PLEKHF2         | -6.224871882 | 8.33E-05    | 0.000932201 |
| HMGN3           | -6.225126758 | 4.49E-05    | 0.000573885 |
| BIVM            | -6.226324591 | 0.000172    | 0.001603178 |
| PEX3            | -6.227658174 | 0.000548754 | 0.003870865 |
| ZNF92           | -6.22904776  | 0.000321338 | 0.002594717 |
| AGAP7P          | -6.2316903   | 0.000102936 | 0.001081541 |

|            |              |             |             |
|------------|--------------|-------------|-------------|
| POMT1      | -6.23254901  | 9.87E-05    | 0.001051287 |
| PDZRN4     | -6.232680324 | 0.015820959 | 0.051843286 |
| MALLP1     | -6.233498747 | 0.002021519 | 0.010560407 |
| HSD17B10   | -6.234845255 | 0.000482935 | 0.003496082 |
| ZFPM2      | -6.234900203 | 6.77E-05    | 0.000799074 |
| FLCN       | -6.238877528 | 2.57E-08    | 8.72E-07    |
| WTIP       | -6.239770797 | 0.000690326 | 0.004647222 |
| C5orf51    | -6.239964285 | 0.005552004 | 0.023277264 |
| ST20-MTHFS | -6.240409288 | 0.000705748 | 0.004715506 |
| TDP1       | -6.242114453 | 0.001684254 | 0.009170585 |
| SMNDC1     | -6.24257458  | 0.000144225 | 0.001413517 |
| KCTD9      | -6.247059532 | 9.40E-06    | 0.00015953  |
| IQUB       | -6.248110996 | 3.17E-05    | 0.000438339 |
| ACADSB     | -6.248808873 | 0.001865454 | 0.009946894 |
| PLSCR4     | -6.250172793 | 0.000265803 | 0.002248272 |
| SERPINE2   | -6.25109641  | 5.85E-05    | 0.00071471  |
| ZNF256     | -6.252766794 | 0.005024163 | 0.021587671 |
| RAB25      | -6.254383315 | 0.00093602  | 0.005861141 |
| MICOS10    | -6.254440955 | 2.58E-05    | 0.000373564 |
| NAIP       | -6.258444113 | 1.24E-07    | 3.58E-06    |
| TMEM184A   | -6.260006582 | 0.000109548 | 0.001134602 |
| ZNF737     | -6.260969003 | 2.38E-05    | 0.000349893 |
| LDAH       | -6.262491021 | 0.000156677 | 0.001498363 |
| ZNF548     | -6.263578802 | 7.39E-05    | 0.000855072 |
| CFB        | -6.263869139 | 0.00012933  | 0.001301258 |
| DNAJB12    | -6.269681348 | 4.95E-05    | 0.000617444 |
| RALA       | -6.271566193 | 3.57E-06    | 6.87E-05    |
| CIBAR1     | -6.273312846 | 6.46E-06    | 0.000116239 |
| COA8       | -6.275628426 | 4.03E-05    | 0.000525626 |
| P2RX4      | -6.278680265 | 8.00E-09    | 2.94E-07    |
| TENT5A     | -6.280134195 | 0.000347609 | 0.002731085 |
| DDOST      | -6.280497635 | 0.001437739 | 0.008181664 |
| SLC25A11   | -6.284946522 | 0.00054632  | 0.003862536 |
| MAPRE2     | -6.28751404  | 9.73E-06    | 0.000163904 |
| RAD54L     | -6.290359243 | 0.001806573 | 0.009671278 |
| CYP2D6     | -6.292350812 | 0.00616367  | 0.025144949 |
| PLXNA4     | -6.293136356 | 9.61E-05    | 0.001030585 |
| SH3BP4     | -6.294625036 | 8.11E-06    | 0.000140882 |
| MST1L      | -6.298873882 | 0.001029215 | 0.006304463 |
| EMG1       | -6.299102869 | 0.000175763 | 0.001627721 |
| ZNF799     | -6.300997106 | 0.000429727 | 0.003196936 |
| OLFML1     | -6.302419138 | 0.00182814  | 0.009769449 |
| GNPDA1     | -6.303095692 | 5.85E-05    | 0.00071471  |
| CLPP       | -6.303530534 | 0.000694159 | 0.004667831 |

|                 |              |             |             |
|-----------------|--------------|-------------|-------------|
| ARSG            | -6.30473807  | 0.000465771 | 0.003403809 |
| B2M             | -6.305504007 | 3.05E-08    | 1.01E-06    |
| HMG2N2P20       | -6.30869497  | 0.000534731 | 0.003799004 |
| ALKBH6          | -6.309426625 | 0.000362492 | 0.002807168 |
| SGPL1           | -6.311358729 | 0.000177433 | 0.001639845 |
| APOC1           | -6.313175738 | 0.000367419 | 0.002832637 |
| TRIM27          | -6.316977932 | 0.001547288 | 0.00862661  |
| HLA-DRA         | -6.318001083 | 0.002261256 | 0.011534025 |
| RNF6            | -6.322211609 | 8.48E-07    | 1.97E-05    |
| SETD7           | -6.323515175 | 1.54E-05    | 0.00024183  |
| NT5C            | -6.325924227 | 3.91E-06    | 7.42E-05    |
| SEM1            | -6.327026837 | 0.000448787 | 0.003306297 |
| ZFYVE21         | -6.328336057 | 4.08E-06    | 7.73E-05    |
| CCDC191         | -6.329762455 | 5.94E-05    | 0.000721565 |
| EEF1A1P4        | -6.331183027 | 7.95E-05    | 0.00090428  |
| RCC1            | -6.33229854  | 0.000174176 | 0.001619688 |
| HSD17B7         | -6.332368498 | 0.001269013 | 0.007431126 |
| FIS1            | -6.334902163 | 0.000219253 | 0.001941359 |
| CCNT1           | -6.335615406 | 1.56E-05    | 0.000245025 |
| MPHOSPH9        | -6.335887666 | 2.89E-09    | 1.13E-07    |
| SEC63P1         | -6.336584585 | 0.000244188 | 0.002109676 |
| DCAF4           | -6.338267173 | 9.39E-05    | 0.00101587  |
| BMPR2           | -6.339263938 | 0.003723043 | 0.017026525 |
| MRFAP1          | -6.341392736 | 2.62E-07    | 7.18E-06    |
| GARNL3          | -6.341747384 | 2.31E-05    | 0.000342208 |
| ZNF74           | -6.344648256 | 1.07E-05    | 0.000178246 |
| DNAAF1          | -6.345502921 | 1.35E-05    | 0.000218284 |
| UQCRH           | -6.346090731 | 1.45E-06    | 3.15E-05    |
| SPAG7           | -6.352376567 | 1.52E-05    | 0.000239099 |
| MDFIC           | -6.352789774 | 0.00147957  | 0.008345162 |
| PTPN9           | -6.355906635 | 0.000346936 | 0.002730376 |
| FAM169A         | -6.356223247 | 0.00011007  | 0.001138707 |
| SLC29A2         | -6.357878425 | 8.12E-06    | 0.000140894 |
| CYB5A           | -6.360326743 | 3.62E-05    | 0.000484826 |
| NTAN1           | -6.36661681  | 4.23E-07    | 1.09E-05    |
| COQ7            | -6.368174592 | 0.001621589 | 0.008897423 |
| AAAS            | -6.368676121 | 7.00E-06    | 0.000124217 |
| ENSG00000280518 | -6.36873073  | 0.000294832 | 0.00242271  |
| SMIM29          | -6.371613372 | 3.07E-05    | 0.000428103 |
| DHODH           | -6.374055561 | 7.24E-05    | 0.000840454 |
| HLA-DPB1        | -6.375041275 | 0.000984661 | 0.006096334 |
| NSDHL           | -6.375780659 | 0.000506155 | 0.003625954 |
| HYAL2           | -6.377037045 | 0.000182895 | 0.001679636 |
| SYVN1           | -6.377319257 | 2.36E-08    | 8.08E-07    |

|                 |              |             |             |
|-----------------|--------------|-------------|-------------|
| SMC1A           | -6.377560098 | 0.000106087 | 0.001106011 |
| SURF1           | -6.378384872 | 0.001614695 | 0.008880007 |
| AKAP17A         | -6.38131518  | 9.57E-06    | 0.000161954 |
| HAT1            | -6.381432335 | 0.000456496 | 0.003346719 |
| PDGFRA          | -6.381928332 | 0.00225359  | 0.011508055 |
| DERL1           | -6.386673107 | 7.80E-05    | 0.000891369 |
| STAG3L5P        | -6.387084156 | 2.45E-06    | 4.94E-05    |
| BCL7B           | -6.389155054 | 9.17E-07    | 2.11E-05    |
| TAF4B           | -6.389467415 | 0.000213779 | 0.001901231 |
| TRPM2           | -6.390069427 | 0.00012366  | 0.001253587 |
| RING1           | -6.390363627 | 0.004236344 | 0.018879493 |
| AFAP1L1         | -6.392759567 | 1.52E-06    | 3.28E-05    |
| FAM114A2        | -6.392820297 | 4.83E-08    | 1.51E-06    |
| ENSG00000271741 | -6.393406053 | 6.05E-05    | 0.000732619 |
| COG2            | -6.395983363 | 1.43E-05    | 0.000227833 |
| ADAM22          | -6.39672071  | 0.000431913 | 0.003206431 |
| ATG4C           | -6.39679457  | 0.00013362  | 0.001329377 |
| ZNF555          | -6.397698479 | 0.000386027 | 0.002944219 |
| PLAAT4          | -6.398359837 | 0.00157137  | 0.008728824 |
| RGPD2           | -6.401392843 | 0.001933184 | 0.010235897 |
| C11orf80        | -6.405131905 | 0.000140979 | 0.001388455 |
| FHOD3           | -6.406259502 | 0.001476381 | 0.008334944 |
| ENSG00000215493 | -6.408218524 | 0.001278333 | 0.007465421 |
| MCU             | -6.408523812 | 0.000123808 | 0.001254039 |
| ENSG00000284431 | -6.409994903 | 0.004526825 | 0.01986573  |
| ENSG00000286185 | -6.412734509 | 2.01E-05    | 0.00030243  |
| COX10           | -6.418427153 | 0.001786578 | 0.009593938 |
| CLMN            | -6.418464828 | 1.08E-07    | 3.17E-06    |
| KRTCAP3         | -6.418854476 | 0.001629472 | 0.008924495 |
| KIRREL1         | -6.421104536 | 0.000193292 | 0.001753824 |
| MRPS18B         | -6.42186219  | 9.99E-06    | 0.000167662 |
| CATSPERG        | -6.427131622 | 5.72E-05    | 0.000702401 |
| DHX33           | -6.428315925 | 4.95E-05    | 0.000617444 |
| EBF4            | -6.431271685 | 0.000165394 | 0.001559135 |
| SCAND2P         | -6.431935588 | 0.000221018 | 0.001951279 |
| KMT2B           | -6.434157429 | 0.002612195 | 0.012919084 |
| MRPL37          | -6.437754355 | 2.47E-06    | 4.98E-05    |
| SLC10A3         | -6.438869108 | 0.000353576 | 0.002757524 |
| SNX11           | -6.441112776 | 0.000382733 | 0.002922774 |
| DRG1            | -6.443143619 | 8.61E-05    | 0.000954459 |
| ITK             | -6.445031063 | 0.000748418 | 0.004927243 |
| DCTN6           | -6.445191954 | 7.54E-05    | 0.000868649 |
| ABHD3           | -6.445766152 | 7.58E-05    | 0.000870441 |
| ACAA2           | -6.4474061   | 4.35E-07    | 1.11E-05    |

|                 |              |             |             |
|-----------------|--------------|-------------|-------------|
| DPYD            | -6.447614754 | 0.000235648 | 0.002056438 |
| GNA13           | -6.448385928 | 8.05E-06    | 0.000139969 |
| JHY             | -6.453544276 | 0.001256675 | 0.007375924 |
| ZNF563          | -6.455198276 | 0.004522244 | 0.019861117 |
| SMIM30          | -6.456052628 | 0.00233354  | 0.011842837 |
| KCTD2           | -6.460829003 | 0.000633093 | 0.004346546 |
| DTWD1           | -6.462639602 | 1.71E-06    | 3.64E-05    |
| EDN3            | -6.464249566 | 0.004165842 | 0.01859954  |
| ZC2HC1A         | -6.466314993 | 9.41E-05    | 0.00101587  |
| IGKV4-1         | -6.469495314 | 0.001757707 | 0.009488593 |
| ZNF569          | -6.471492165 | 3.57E-08    | 1.15E-06    |
| RAB24           | -6.472672002 | 0.000236102 | 0.002057434 |
| CTNBL1          | -6.473047471 | 6.36E-05    | 0.000761537 |
| EHD1            | -6.476085282 | 1.48E-07    | 4.18E-06    |
| ENSG00000250424 | -6.477531485 | 0.004104695 | 0.018360393 |
| ZFP64           | -6.479222088 | 0.001769205 | 0.009526006 |
| ULK4            | -6.481371592 | 4.86E-06    | 9.07E-05    |
| MTIF3           | -6.483258682 | 4.25E-05    | 0.000549014 |
| NFKB2           | -6.487830352 | 5.74E-07    | 1.43E-05    |
| IGHV3-21        | -6.488067256 | 0.004987658 | 0.021481465 |
| MINDY3          | -6.489709353 | 2.74E-08    | 9.22E-07    |
| MED6            | -6.489943715 | 1.59E-06    | 3.41E-05    |
| CC2D1B          | -6.490151554 | 3.25E-08    | 1.05E-06    |
| LDLR            | -6.494842087 | 1.64E-09    | 6.58E-08    |
| TOMM70          | -6.496992313 | 3.17E-05    | 0.000438339 |
| MIIP            | -6.502909719 | 0.000847225 | 0.005414369 |
| WDR76           | -6.503768918 | 3.64E-05    | 0.000486171 |
| GPR171          | -6.515448318 | 0.001614747 | 0.008880007 |
| IL3RA           | -6.5160614   | 0.00049446  | 0.003560344 |
| GLDN            | -6.516109745 | 0.001628453 | 0.008924495 |
| CCDC25          | -6.518022532 | 0.000548778 | 0.003870865 |
| IARS1           | -6.519256317 | 0.000834986 | 0.00535311  |
| NCBP2           | -6.520188646 | 1.32E-05    | 0.000213186 |
| TMEM150A        | -6.522035613 | 2.20E-05    | 0.000326825 |
| ACTL6A          | -6.523285386 | 5.06E-06    | 9.39E-05    |
| RSRC1           | -6.524993261 | 6.21E-06    | 0.000112615 |
| TSGA10          | -6.527475246 | 8.27E-08    | 2.45E-06    |
| OR7E38P         | -6.529742744 | 0.000182563 | 0.001677862 |
| MSANTD2         | -6.530553794 | 0.000196047 | 0.00177218  |
| TSPAN9          | -6.533741501 | 0.000267195 | 0.00225689  |
| MGAT4A          | -6.534260298 | 9.30E-09    | 3.33E-07    |
| ZNF25           | -6.53490095  | 6.49E-06    | 0.000116364 |
| SMN1            | -6.540271319 | 0.000409069 | 0.003077301 |
| CYP1B1          | -6.541264262 | 0.000319403 | 0.002582534 |

|          |              |             |             |
|----------|--------------|-------------|-------------|
| TEX10    | -6.54279163  | 4.17E-07    | 1.07E-05    |
| EMP3     | -6.54486494  | 6.72E-05    | 0.000796263 |
| STAT4    | -6.545322204 | 0.000684908 | 0.004615883 |
| PIK3CG   | -6.553710013 | 0.000514449 | 0.003671515 |
| LTF      | -6.553849877 | 0.001003803 | 0.006180076 |
| ARHGAP9  | -6.564132118 | 2.68E-06    | 5.36E-05    |
| EOLA2    | -6.564634034 | 0.000156053 | 0.001496487 |
| GXYLT1   | -6.566420064 | 6.97E-07    | 1.70E-05    |
| EEF2KMT  | -6.567716574 | 0.000531902 | 0.003784918 |
| TMEM127  | -6.568627863 | 4.55E-07    | 1.16E-05    |
| NEU1     | -6.570875098 | 0.000793401 | 0.005167592 |
| DCTD     | -6.571545107 | 0.000191879 | 0.001744931 |
| WDR91    | -6.575003253 | 4.14E-05    | 0.000537223 |
| SIRT3    | -6.577010732 | 2.07E-05    | 0.00031027  |
| RAB23    | -6.578918784 | 3.66E-06    | 7.03E-05    |
| TYW5     | -6.579026378 | 1.03E-08    | 3.68E-07    |
| RCOR1    | -6.585985245 | 0.000507315 | 0.00362927  |
| NDUFB8   | -6.586414148 | 8.89E-06    | 0.000152364 |
| PPP1R7   | -6.59145662  | 2.50E-07    | 6.88E-06    |
| FOXJ2    | -6.596383459 | 2.23E-06    | 4.58E-05    |
| YIPF1    | -6.597867603 | 5.05E-05    | 0.000626556 |
| ZNF704   | -6.599846858 | 9.26E-06    | 0.000157811 |
| PDZK1    | -6.603951935 | 0.000387315 | 0.002946535 |
| TBP      | -6.606951711 | 1.24E-07    | 3.58E-06    |
| CD47     | -6.607547458 | 3.03E-07    | 8.06E-06    |
| THAP6    | -6.611335114 | 0.000133878 | 0.001330429 |
| SYCP3    | -6.614168011 | 6.53E-07    | 1.61E-05    |
| ZC3H15   | -6.614977345 | 3.94E-05    | 0.000516303 |
| ADAM19   | -6.616194909 | 4.19E-05    | 0.000542417 |
| CCDC7    | -6.616338015 | 1.64E-06    | 3.50E-05    |
| INPP5D   | -6.617170866 | 8.27E-06    | 0.000143224 |
| KLHL18   | -6.617206392 | 5.77E-05    | 0.000708061 |
| SDHA     | -6.618986992 | 4.13E-08    | 1.31E-06    |
| PLPBP    | -6.620159535 | 7.48E-06    | 0.000131341 |
| C19orf12 | -6.625646061 | 6.44E-06    | 0.000115972 |
| TXN2     | -6.626999624 | 1.58E-06    | 3.39E-05    |
| FADS3    | -6.628339223 | 1.64E-06    | 3.50E-05    |
| ARHGAP18 | -6.630246162 | 0.000370938 | 0.002848969 |
| GFM2     | -6.631604868 | 3.72E-05    | 0.000494653 |
| ANKRD49  | -6.631713283 | 4.77E-05    | 0.000603758 |
| GCDH     | -6.632737892 | 3.85E-05    | 0.00050883  |
| CWC22    | -6.633507779 | 0.001179393 | 0.007029502 |
| HACD3    | -6.637220411 | 1.31E-08    | 4.60E-07    |
| PSMD6    | -6.638705366 | 2.04E-06    | 4.25E-05    |



|                 |              |             |             |
|-----------------|--------------|-------------|-------------|
| CA2             | -6.640091802 | 5.32E-05    | 0.000656262 |
| CYP4B1          | -6.640632597 | 4.68E-05    | 0.000593828 |
| AP1M2           | -6.642188536 | 0.000363419 | 0.002810753 |
| SLC27A6         | -6.642239372 | 0.00356486  | 0.016450274 |
| PLOD3           | -6.642583553 | 5.43E-10    | 2.30E-08    |
| DEPDC5          | -6.643116726 | 6.86E-05    | 0.000807857 |
| RXRB            | -6.644271619 | 7.84E-06    | 0.00013658  |
| LDLRAP1         | -6.646608349 | 8.66E-08    | 2.56E-06    |
| TLR3            | -6.646753566 | 7.45E-06    | 0.000131086 |
| POLD3           | -6.64691557  | 0.000315474 | 0.002557598 |
| DRAM2           | -6.647416089 | 0.000344586 | 0.00271895  |
| TECTA           | -6.648469977 | 6.86E-05    | 0.000807857 |
| TTC23           | -6.649229511 | 1.56E-06    | 3.36E-05    |
| RNF14           | -6.650722403 | 2.61E-06    | 5.24E-05    |
| POP1            | -6.65133047  | 0.000355758 | 0.002767413 |
| NEK8            | -6.651734646 | 4.54E-05    | 0.000579016 |
| NR2F1           | -6.651841527 | 0.000229161 | 0.002009977 |
| GIPC1           | -6.652706875 | 2.10E-09    | 8.38E-08    |
| ZNF322          | -6.654449181 | 3.06E-05    | 0.000427258 |
| EPC2            | -6.654630572 | 3.20E-06    | 6.26E-05    |
| C6orf136        | -6.654806073 | 2.28E-06    | 4.66E-05    |
| PLIN3           | -6.661495461 | 9.76E-09    | 3.49E-07    |
| ENSG00000212664 | -6.66371024  | 5.33E-06    | 9.87E-05    |
| TFAM            | -6.66613479  | 9.93E-05    | 0.001054296 |
| ACADM           | -6.668225903 | 1.08E-06    | 2.46E-05    |
| TVP23B          | -6.672505425 | 2.71E-07    | 7.38E-06    |
| H2BC18          | -6.67506939  | 0.002214896 | 0.011379076 |
| OSBPL3          | -6.678374728 | 8.09E-07    | 1.89E-05    |
| CCS             | -6.679522432 | 1.39E-05    | 0.000222522 |
| COPS2           | -6.682535373 | 4.07E-10    | 1.75E-08    |
| CDK18           | -6.685319634 | 4.52E-06    | 8.50E-05    |
| ZNF589          | -6.685481885 | 0.000162493 | 0.001538981 |
| B3GNT5          | -6.686436456 | 3.90E-05    | 0.000513309 |
| TEDC1           | -6.687503044 | 3.51E-06    | 6.77E-05    |
| LRMDA           | -6.687511883 | 0.00015374  | 0.001483582 |
| MAP3K11         | -6.691932325 | 3.02E-09    | 1.18E-07    |
| UBE2L6          | -6.694325419 | 5.38E-06    | 9.94E-05    |
| HNRNPAB         | -6.695230604 | 4.99E-06    | 9.28E-05    |
| CAPZA2          | -6.702367606 | 1.50E-08    | 5.26E-07    |
| MRPL1           | -6.705481737 | 3.67E-05    | 0.000488599 |
| ARMCX5          | -6.707594341 | 1.91E-07    | 5.32E-06    |
| BMS1P2          | -6.709357323 | 0.001272337 | 0.007443389 |
| CENPO           | -6.710764008 | 5.04E-05    | 0.000626037 |
| LNPB            | -6.716031283 | 0.001093179 | 0.006602715 |

|                 |              |             |             |
|-----------------|--------------|-------------|-------------|
| ZDHC13          | -6.717027698 | 1.80E-06    | 3.80E-05    |
| KLF7            | -6.718043361 | 3.64E-05    | 0.000486171 |
| IKZF1           | -6.718256218 | 0.00021958  | 0.001941414 |
| LAMTOR2         | -6.720162004 | 0.00112961  | 0.006778782 |
| ADAL            | -6.72814464  | 0.000371018 | 0.002848969 |
| GOLGA6L3        | -6.733764878 | 9.23E-05    | 0.001003427 |
| CEP85L          | -6.736657199 | 1.54E-05    | 0.00024183  |
| CSRNP3          | -6.738230993 | 0.000626576 | 0.004311584 |
| TPCN2           | -6.741130279 | 0.000131186 | 0.001313375 |
| ANKRD36BP2      | -6.741497517 | 7.41E-05    | 0.000856945 |
| DHTKD1          | -6.744876481 | 2.21E-06    | 4.53E-05    |
| RPL17P3         | -6.747458176 | 1.79E-08    | 6.16E-07    |
| DNAJC5          | -6.749352647 | 0.000789656 | 0.005152558 |
| ENSG00000244716 | -6.753223063 | 1.82E-06    | 3.84E-05    |
| SP1             | -6.758726144 | 8.08E-07    | 1.89E-05    |
| POLR2C          | -6.758903114 | 3.67E-05    | 0.00048915  |
| CDK14           | -6.760561089 | 1.56E-06    | 3.35E-05    |
| CHCHD2          | -6.761485206 | 0.000876703 | 0.005575981 |
| IL32            | -6.762505478 | 4.82E-05    | 0.000607944 |
| DCUN1D4         | -6.762940709 | 1.73E-06    | 3.68E-05    |
| ANAPC7          | -6.774449465 | 1.27E-07    | 3.64E-06    |
| RCE1            | -6.778310734 | 4.22E-07    | 1.08E-05    |
| INMT-MINDY4     | -6.780967986 | 0.000197248 | 0.00178038  |
| ZNF732          | -6.782398146 | 0.000290704 | 0.002403473 |
| PRMT3           | -6.78321972  | 3.03E-06    | 5.99E-05    |
| UBE2L3          | -6.784466162 | 6.77E-07    | 1.66E-05    |
| OGDHL           | -6.788957946 | 5.84E-05    | 0.00071471  |
| PEX26           | -6.789076756 | 4.57E-10    | 1.95E-08    |
| PIM2            | -6.790040374 | 0.000359029 | 0.002787481 |
| MTMR2           | -6.791188124 | 0.00026152  | 0.002221361 |
| UTP25           | -6.792237993 | 5.81E-05    | 0.000711827 |
| ZNF28           | -6.792695521 | 0.000126981 | 0.00128403  |
| PREB            | -6.796490909 | 1.14E-07    | 3.32E-06    |
| IPO13           | -6.79662635  | 2.16E-05    | 0.000322224 |
| PIGO            | -6.797314784 | 1.35E-05    | 0.000217425 |
| RAB1B           | -6.802549136 | 4.00E-05    | 0.000522544 |
| VPS26A          | -6.805744519 | 1.07E-06    | 2.45E-05    |
| FANCD2          | -6.806093579 | 0.000178625 | 0.00164918  |
| FRG1            | -6.807137728 | 9.58E-06    | 0.000161974 |
| CYP2C8          | -6.81588168  | 3.78E-05    | 0.000500953 |
| PGM3            | -6.816874929 | 1.76E-06    | 3.72E-05    |
| TTLL7           | -6.8189133   | 2.92E-08    | 9.70E-07    |
| SPCS1           | -6.819866224 | 0.000540363 | 0.003826409 |
| KNSTRN          | -6.822177615 | 9.17E-05    | 0.00100059  |

|                 |              |             |             |
|-----------------|--------------|-------------|-------------|
| ANKRD27         | -6.823099325 | 0.000160042 | 0.001522912 |
| ACSS2           | -6.823675634 | 0.000270888 | 0.002277374 |
| ALDH5A1         | -6.823918837 | 3.81E-05    | 0.000503916 |
| HDAC9           | -6.824086755 | 1.84E-06    | 3.87E-05    |
| DCAF13          | -6.825557692 | 7.05E-08    | 2.13E-06    |
| FCGR2B          | -6.825567915 | 0.001205248 | 0.007147632 |
| PTPRQ           | -6.826228682 | 0.000106811 | 0.001112603 |
| VAR51           | -6.828586725 | 1.37E-06    | 2.99E-05    |
| CAAP1           | -6.834989869 | 4.90E-05    | 0.00061479  |
| ABHD2           | -6.835107919 | 7.28E-08    | 2.19E-06    |
| GBP1            | -6.836329758 | 0.000796893 | 0.005185801 |
| MAP9            | -6.839637995 | 7.15E-06    | 0.000126485 |
| ALK             | -6.840505354 | 0.000298846 | 0.002447383 |
| MS4A6A          | -6.841750816 | 2.41E-05    | 0.000354825 |
| TTLL4           | -6.84645991  | 1.47E-05    | 0.000232801 |
| FANCC           | -6.848465084 | 0.000391337 | 0.002969745 |
| FAM247A         | -6.850448246 | 0.006737814 | 0.027004802 |
| MAN1B1          | -6.850689995 | 4.45E-05    | 0.000569431 |
| TEK             | -6.852667604 | 0.000171495 | 0.001601252 |
| DENND11         | -6.853146066 | 6.66E-09    | 2.47E-07    |
| PEDS1           | -6.856054992 | 0.000338325 | 0.002681162 |
| PAPSS1          | -6.858269983 | 4.90E-05    | 0.00061479  |
| ENSG00000258461 | -6.860097218 | 0.001292344 | 0.007527687 |
| MTMR9           | -6.862156755 | 2.36E-06    | 4.78E-05    |
| COX4I1          | -6.862456793 | 3.28E-06    | 6.38E-05    |
| PEF1            | -6.86320757  | 7.22E-07    | 1.75E-05    |
| SLC66A2         | -6.863363335 | 2.91E-06    | 5.78E-05    |
| TEX2            | -6.864194481 | 1.96E-06    | 4.11E-05    |
| UBXN2B          | -6.865174991 | 5.78E-05    | 0.000709294 |
| BBS2            | -6.865304032 | 0.000426836 | 0.003183255 |
| DMPK            | -6.865808515 | 3.73E-08    | 1.19E-06    |
| NME7            | -6.867790044 | 2.05E-06    | 4.27E-05    |
| RGPD1           | -6.868944008 | 0.000179326 | 0.001654392 |
| SCARB1          | -6.86894556  | 1.86E-05    | 0.000285357 |
| EFNA1           | -6.870669212 | 2.32E-06    | 4.71E-05    |
| PHYHD1          | -6.878901726 | 0.000157879 | 0.001507068 |
| YME1L1          | -6.879550508 | 1.31E-06    | 2.89E-05    |
| DDR2            | -6.880537051 | 0.000213159 | 0.001897118 |
| ENSG00000234742 | -6.882458747 | 8.85E-06    | 0.000152138 |
| CNTLN           | -6.88470605  | 3.45E-05    | 0.000468057 |
| NMT1            | -6.885818994 | 0.000288036 | 0.002386304 |
| SLC35B3         | -6.886198367 | 3.90E-08    | 1.25E-06    |
| CHCHD10         | -6.887244821 | 1.06E-08    | 3.76E-07    |
| MACROD2         | -6.890873301 | 2.45E-05    | 0.000359378 |

|                 |              |             |             |
|-----------------|--------------|-------------|-------------|
| BCL2L11         | -6.8967171   | 5.42E-07    | 1.36E-05    |
| LHPP            | -6.899463812 | 3.29E-08    | 1.07E-06    |
| NUP42           | -6.899680975 | 7.47E-08    | 2.24E-06    |
| ST3GAL3         | -6.903053564 | 0.001079772 | 0.006544595 |
| LETM1           | -6.90408596  | 2.82E-05    | 0.000402203 |
| BET1L           | -6.904675363 | 2.83E-05    | 0.000402922 |
| ENSG00000274944 | -6.906649773 | 0.000932718 | 0.005846513 |
| CTTNBP2         | -6.908370369 | 3.32E-06    | 6.45E-05    |
| CFB             | -6.908576375 | 2.72E-06    | 5.43E-05    |
| GPT             | -6.909476864 | 0.000269418 | 0.002268052 |
| EVC2            | -6.913558307 | 0.000228152 | 0.002002577 |
| ARHGAP33        | -6.92056721  | 6.77E-06    | 0.000120829 |
| ITGB6           | -6.922384602 | 1.56E-05    | 0.000244149 |
| NUDT5           | -6.923407636 | 0.000107932 | 0.001122339 |
| ENSG00000239969 | -6.928547246 | 1.30E-06    | 2.87E-05    |
| NMRK1           | -6.929361169 | 1.30E-05    | 0.000211321 |
| TAS2R19         | -6.930523563 | 0.000187104 | 0.001711798 |
| TYW3            | -6.932405657 | 5.53E-09    | 2.08E-07    |
| NEMP1           | -6.939270181 | 3.19E-05    | 0.000439352 |
| MARK4           | -6.939291634 | 0.000204077 | 0.00182974  |
| USP24           | -6.944960682 | 1.83E-09    | 7.32E-08    |
| STX3            | -6.945532899 | 1.82E-08    | 6.25E-07    |
| GPR89B          | -6.95958776  | 0.001477096 | 0.008335091 |
| SART3           | -6.960122763 | 4.25E-11    | 1.91E-09    |
| ANAPC15         | -6.96136017  | 1.34E-06    | 2.95E-05    |
| INCENP          | -6.961402382 | 3.58E-09    | 1.39E-07    |
| MID1            | -6.972240358 | 7.52E-05    | 0.000867182 |
| GMFB            | -6.972662089 | 3.76E-06    | 7.20E-05    |
| MYO3B           | -6.973229715 | 4.19E-06    | 7.93E-05    |
| KIAA1143        | -6.977463941 | 5.59E-06    | 0.000102516 |
| USO1            | -6.98508345  | 0.000361526 | 0.002801482 |
| ZMYM1           | -6.989667358 | 5.19E-07    | 1.31E-05    |
| LANCL2          | -6.990505268 | 1.38E-06    | 3.01E-05    |
| NBPF1           | -6.991374619 | 1.38E-07    | 3.92E-06    |
| ARMC6           | -6.991875707 | 2.13E-05    | 0.000318904 |
| STX5            | -6.995807697 | 1.61E-05    | 0.000250607 |
| GATD3B          | -6.996769318 | 8.84E-05    | 0.000973601 |
| IRAG2           | -6.997944815 | 6.74E-05    | 0.000797375 |
| EIF2B3          | -7.002073497 | 2.93E-07    | 7.91E-06    |
| CACNB3          | -7.00598883  | 1.71E-05    | 0.000263492 |
| EIF4H           | -7.007040811 | 7.93E-10    | 3.32E-08    |
| HEBP2           | -7.011058562 | 1.07E-09    | 4.43E-08    |
| SPRED2          | -7.012225892 | 1.45E-08    | 5.09E-07    |
| EMC2            | -7.014611778 | 0.000338468 | 0.002681162 |

|          |              |             |             |
|----------|--------------|-------------|-------------|
| ACVR2B   | -7.015000323 | 5.02E-07    | 1.27E-05    |
| NRG1     | -7.016260625 | 0.00083818  | 0.005367897 |
| BPNT1    | -7.016624107 | 6.91E-05    | 0.000809946 |
| NPIP6    | -7.021678831 | 0.001030701 | 0.006310374 |
| UAP1     | -7.025296398 | 5.31E-13    | 2.98E-11    |
| DPM1     | -7.030265645 | 2.46E-05    | 0.000360759 |
| GPM6B    | -7.032492653 | 3.30E-07    | 8.75E-06    |
| TBC1D3B  | -7.033912062 | 2.85E-05    | 0.000403853 |
| RNF180   | -7.03473725  | 2.55E-06    | 5.14E-05    |
| CRABP2   | -7.03489282  | 2.34E-12    | 1.16E-10    |
| DGAT2    | -7.036432401 | 6.40E-06    | 0.000115416 |
| SMPDL3A  | -7.03906106  | 2.48E-05    | 0.000362743 |
| VMA21    | -7.040301941 | 0.000239153 | 0.002075062 |
| ZNF630   | -7.040311355 | 8.18E-07    | 1.91E-05    |
| DPP3     | -7.041976387 | 1.06E-06    | 2.42E-05    |
| PRTG     | -7.044625959 | 0.000281634 | 0.00234611  |
| PIP4K2B  | -7.044872235 | 1.90E-07    | 5.30E-06    |
| SNRPA1   | -7.045061854 | 5.63E-06    | 0.000102992 |
| EXD2     | -7.047243309 | 6.01E-08    | 1.84E-06    |
| TRMT1L   | -7.048946162 | 2.51E-05    | 0.000366534 |
| IFI27    | -7.049231544 | 3.89E-05    | 0.000512103 |
| COX7A2   | -7.049398425 | 3.14E-06    | 6.15E-05    |
| TMEM167A | -7.050601516 | 0.003575544 | 0.016487005 |
| IGLV1-40 | -7.050874342 | 0.001515892 | 0.008486426 |
| TWSG1    | -7.052094348 | 9.31E-06    | 0.000158477 |
| PA2G4P4  | -7.052277    | 2.49E-05    | 0.000363382 |
| RAB13    | -7.053310151 | 3.40E-05    | 0.000463738 |
| OXSRI    | -7.055874736 | 6.45E-07    | 1.59E-05    |
| DIABLO   | -7.059558953 | 0.000584274 | 0.004071176 |
| SOAT1    | -7.060986577 | 1.30E-06    | 2.87E-05    |
| TBC1D3L  | -7.061834005 | 0.000898002 | 0.005674182 |
| TUBE1    | -7.063157512 | 0.000166147 | 0.001565011 |
| PTDSS2   | -7.066174762 | 7.59E-07    | 1.81E-05    |
| ZNF480   | -7.073103596 | 7.41E-08    | 2.23E-06    |
| CARF     | -7.073343964 | 1.40E-11    | 6.56E-10    |
| COPS6    | -7.073850417 | 3.01E-07    | 8.03E-06    |
| INO80B   | -7.074280557 | 6.22E-05    | 0.000747229 |
| SNRPA    | -7.078057769 | 8.06E-10    | 3.37E-08    |
| ITGAL    | -7.084328027 | 0.00098361  | 0.006092945 |
| UQCC2    | -7.085339528 | 6.16E-05    | 0.000740657 |
| OXNAD1   | -7.087865459 | 2.67E-08    | 9.00E-07    |
| RAB5IF   | -7.087926335 | 1.30E-06    | 2.87E-05    |
| RNF2     | -7.088375712 | 3.64E-06    | 7.01E-05    |
| RALB     | -7.088941186 | 8.01E-08    | 2.39E-06    |

|            |              |             |             |
|------------|--------------|-------------|-------------|
| MAP2K7     | -7.092171052 | 2.15E-06    | 4.45E-05    |
| ZNF774     | -7.096712562 | 4.97E-05    | 0.000618468 |
| E2F5       | -7.099207678 | 1.16E-06    | 2.62E-05    |
| SERF1B     | -7.099416426 | 0.000262563 | 0.002228651 |
| SLC38A5    | -7.104409595 | 2.85E-06    | 5.69E-05    |
| PRODH      | -7.104734288 | 0.002453201 | 0.012310756 |
| PUS1       | -7.106813255 | 2.21E-06    | 4.53E-05    |
| ING3       | -7.10990909  | 0.000666903 | 0.004519707 |
| RALGAPA1P1 | -7.111623267 | 4.29E-06    | 8.10E-05    |
| RBMS1      | -7.112726192 | 1.03E-07    | 3.04E-06    |
| TBC1D8     | -7.115082994 | 2.96E-08    | 9.78E-07    |
| FAM135A    | -7.11617106  | 3.68E-09    | 1.42E-07    |
| PNP        | -7.119399744 | 5.93E-05    | 0.000721565 |
| DAGLA      | -7.120348152 | 0.000303804 | 0.002482947 |
| CHN2       | -7.122800736 | 1.05E-06    | 2.40E-05    |
| ACTR1A     | -7.12326292  | 3.09E-08    | 1.02E-06    |
| FMNL2      | -7.132861727 | 4.52E-05    | 0.000576749 |
| CAD        | -7.132885464 | 1.28E-07    | 3.66E-06    |
| G3BP1      | -7.133026573 | 0.000107641 | 0.001120279 |
| RBM34      | -7.135572014 | 4.46E-08    | 1.40E-06    |
| FAM149B1   | -7.136835794 | 2.63E-08    | 8.89E-07    |
| PNRC2      | -7.13949472  | 1.48E-11    | 6.93E-10    |
| TAPBP      | -7.140983983 | 3.82E-10    | 1.65E-08    |
| RPAP1      | -7.150723516 | 1.04E-05    | 0.00017367  |
| EFCAB2     | -7.152602338 | 3.51E-06    | 6.77E-05    |
| INPP5B     | -7.155794068 | 5.65E-08    | 1.75E-06    |
| CYP51A1    | -7.165410978 | 6.26E-08    | 1.91E-06    |
| RPA1       | -7.165506514 | 1.08E-06    | 2.45E-05    |
| CEP68      | -7.175788445 | 5.48E-09    | 2.07E-07    |
| HLF        | -7.177741651 | 0.000103896 | 0.001088798 |
| TTC26      | -7.177919179 | 1.09E-09    | 4.48E-08    |
| CYRIA      | -7.178412943 | 7.92E-09    | 2.91E-07    |
| MLYCD      | -7.181297052 | 1.25E-07    | 3.58E-06    |
| CCDC93     | -7.182942945 | 1.72E-08    | 5.97E-07    |
| BANF1      | -7.188840538 | 8.09E-11    | 3.63E-09    |
| PLCXD1     | -7.189124912 | 1.21E-06    | 2.71E-05    |
| ATG4A      | -7.189579205 | 0.000117467 | 0.001202899 |
| CLCNKA     | -7.192129884 | 0.001453412 | 0.008232146 |
| FANCG      | -7.194170053 | 4.41E-05    | 0.000564497 |
| ZNF496     | -7.19738906  | 9.58E-10    | 3.97E-08    |
| ABCE1      | -7.201992251 | 9.29E-09    | 3.33E-07    |
| IL1RAP     | -7.203474168 | 4.96E-09    | 1.89E-07    |
| COPS7A     | -7.204136583 | 3.47E-06    | 6.71E-05    |
| NCK1       | -7.20420627  | 8.09E-09    | 2.96E-07    |

|                 |              |             |             |
|-----------------|--------------|-------------|-------------|
| RAB5B           | -7.212363262 | 4.03E-11    | 1.83E-09    |
| MMP9            | -7.213840374 | 0.000327599 | 0.00262865  |
| ENSG00000278019 | -7.215860419 | 0.002365318 | 0.011978998 |
| CALU            | -7.223286932 | 9.17E-05    | 0.00100059  |
| PWWP3A          | -7.223818554 | 8.16E-11    | 3.65E-09    |
| TRPC6           | -7.224687539 | 7.83E-06    | 0.00013658  |
| SEC61A2         | -7.233241367 | 1.11E-05    | 0.000183422 |
| RPL36A-HNRNPH2  | -7.236232261 | 0.000148067 | 0.001440799 |
| ZNF326          | -7.236335342 | 1.14E-07    | 3.32E-06    |
| DHCR7           | -7.23893493  | 4.65E-06    | 8.72E-05    |
| SLC41A3         | -7.243000532 | 2.95E-08    | 9.78E-07    |
| FER             | -7.246968324 | 3.69E-08    | 1.18E-06    |
| SPECC1L-ADORA2A | -7.24780107  | 0.000346711 | 0.002730376 |
| CASP9           | -7.262232391 | 8.04E-07    | 1.89E-05    |
| MRPL20          | -7.271229439 | 1.26E-07    | 3.60E-06    |
| CERCAM          | -7.271855635 | 7.45E-07    | 1.80E-05    |
| NDUFV3          | -7.273176573 | 5.43E-08    | 1.68E-06    |
| IPO8            | -7.277294843 | 4.23E-11    | 1.91E-09    |
| ZNF568          | -7.282498135 | 2.09E-08    | 7.18E-07    |
| TMEM14B         | -7.287941202 | 8.27E-05    | 0.000928212 |
| SLC16A2         | -7.302949884 | 7.16E-07    | 1.74E-05    |
| BCKDHB          | -7.303183795 | 7.96E-05    | 0.00090428  |
| NCAM1           | -7.303853216 | 8.68E-07    | 2.01E-05    |
| MMAB            | -7.304147621 | 0.000181114 | 0.001667078 |
| STON2           | -7.304257247 | 3.17E-08    | 1.04E-06    |
| TADA2A          | -7.304273372 | 5.59E-07    | 1.40E-05    |
| CCT4            | -7.306764839 | 4.86E-10    | 2.07E-08    |
| FGGY            | -7.309986316 | 5.49E-06    | 0.000100896 |
| CDKL5           | -7.32389072  | 6.28E-08    | 1.91E-06    |
| GOLM1           | -7.33202778  | 6.90E-06    | 0.00012268  |
| LMBR1L          | -7.332848255 | 3.53E-07    | 9.32E-06    |
| FAM76B          | -7.333493439 | 3.11E-06    | 6.14E-05    |
| IL6R            | -7.334906455 | 4.92E-05    | 0.000615975 |
| RSPRY1          | -7.339011464 | 2.79E-11    | 1.28E-09    |
| SUMO1           | -7.34422306  | 6.53E-09    | 2.43E-07    |
| DCBLD1          | -7.347694458 | 6.22E-06    | 0.000112615 |
| MRPS15          | -7.348741162 | 0.005358882 | 0.022727368 |
| PIP4K2C         | -7.35178863  | 1.27E-05    | 0.000207625 |
| CAPN3           | -7.353572172 | 0.000349772 | 0.002741991 |
| MEMO1           | -7.357103735 | 8.01E-07    | 1.89E-05    |
| GOLGA6L9        | -7.364489277 | 0.000436982 | 0.003233023 |
| BIRC3           | -7.365844261 | 0.000386363 | 0.002944922 |
| PARP1           | -7.372754186 | 2.80E-08    | 9.37E-07    |
| ZNF808          | -7.377754146 | 1.76E-05    | 0.000269986 |

|                 |              |             |             |
|-----------------|--------------|-------------|-------------|
| ENSG00000283515 | -7.382051935 | 1.40E-09    | 5.67E-08    |
| BCO2            | -7.383236933 | 8.96E-06    | 0.000153365 |
| ENSG00000205236 | -7.38412297  | 0.000506268 | 0.003625954 |
| PAFAH2          | -7.384766499 | 1.24E-07    | 3.58E-06    |
| DIP2C           | -7.385672744 | 5.71E-09    | 2.14E-07    |
| TMEM185A        | -7.394031197 | 9.06E-09    | 3.26E-07    |
| DCLK2           | -7.399938414 | 4.34E-06    | 8.16E-05    |
| MCM2            | -7.410073925 | 9.28E-05    | 0.001007633 |
| ENPP2           | -7.410778295 | 4.15E-07    | 1.07E-05    |
| COMMD10         | -7.413352634 | 5.97E-07    | 1.48E-05    |
| SRGAP2D         | -7.41847055  | 8.70E-05    | 0.000962919 |
| KPNA2P3         | -7.42123607  | 2.93E-06    | 5.81E-05    |
| TRIP4           | -7.421809259 | 5.91E-07    | 1.47E-05    |
| HSP90AB1        | -7.430709572 | 0.003769211 | 0.017144882 |
| PARG            | -7.433348003 | 2.06E-06    | 4.27E-05    |
| TRIB2           | -7.438360826 | 1.13E-06    | 2.55E-05    |
| EFR3B           | -7.440534698 | 7.32E-06    | 0.000129236 |
| BRCA1           | -7.440910462 | 4.33E-09    | 1.66E-07    |
| AIMP1           | -7.448937017 | 7.49E-07    | 1.80E-05    |
| GPATCH2L        | -7.450764702 | 2.66E-09    | 1.05E-07    |
| FAM153A         | -7.451344259 | 0.000429681 | 0.003196936 |
| NSFP1           | -7.455895976 | 9.64E-05    | 0.00103234  |
| PRUNE1          | -7.464472397 | 2.81E-07    | 7.60E-06    |
| GOLGA6L17P      | -7.469646911 | 2.45E-07    | 6.74E-06    |
| IGHV3-30        | -7.470957073 | 0.000411458 | 0.003091427 |
| UVRAG           | -7.474451649 | 3.94E-07    | 1.03E-05    |
| FBXO42          | -7.483424912 | 5.45E-13    | 3.04E-11    |
| CAMSAP3         | -7.485767032 | 1.06E-05    | 0.000176777 |
| IGHGP           | -7.49589977  | 0.000307995 | 0.002508727 |
| EML6            | -7.498927761 | 3.27E-09    | 1.27E-07    |
| CEP83           | -7.511966137 | 1.60E-11    | 7.44E-10    |
| MAOA            | -7.517696788 | 6.59E-07    | 1.62E-05    |
| PICK1           | -7.5180897   | 2.94E-05    | 0.000414951 |
| TRNT1           | -7.520116792 | 1.43E-06    | 3.10E-05    |
| HFE             | -7.522753985 | 5.20E-07    | 1.31E-05    |
| RAB11A          | -7.524110216 | 1.10E-09    | 4.51E-08    |
| DCXR            | -7.525855899 | 4.36E-05    | 0.000559509 |
| RPGR            | -7.526966828 | 9.46E-08    | 2.79E-06    |
| PHLPP1          | -7.531375954 | 1.91E-06    | 4.02E-05    |
| INPP4B          | -7.540552722 | 3.20E-08    | 1.04E-06    |
| TRAK2           | -7.540602865 | 1.89E-05    | 0.000288937 |
| CCDC144A        | -7.541718711 | 0.000466248 | 0.003403809 |
| METTL15         | -7.542395793 | 4.13E-08    | 1.31E-06    |
| VANGL1          | -7.545479959 | 1.11E-05    | 0.000183422 |



|                 |              |             |             |
|-----------------|--------------|-------------|-------------|
| MTRR            | -7.54731958  | 5.89E-08    | 1.81E-06    |
| MOCS2           | -7.547958907 | 2.45E-08    | 8.34E-07    |
| CAMK1D          | -7.553126582 | 3.60E-07    | 9.49E-06    |
| ZBTB43          | -7.553175548 | 1.47E-09    | 5.95E-08    |
| HLA-DQA1        | -7.556844164 | 0.001495903 | 0.008417673 |
| SHISA5P2        | -7.558052738 | 4.67E-07    | 1.19E-05    |
| WVOX            | -7.559836693 | 3.13E-06    | 6.15E-05    |
| MTERF2          | -7.560690146 | 1.95E-12    | 9.94E-11    |
| KCNMA1          | -7.561371818 | 3.97E-07    | 1.04E-05    |
| SRPRB           | -7.561720464 | 6.32E-08    | 1.92E-06    |
| CHI3L2          | -7.568777757 | 0.000136144 | 0.001350833 |
| GPS1            | -7.582482106 | 3.72E-11    | 1.70E-09    |
| NAIP            | -7.583887084 | 1.84E-06    | 3.87E-05    |
| APPBP2          | -7.587127314 | 2.15E-07    | 5.98E-06    |
| NPHP3-ACAD11    | -7.589292853 | 4.83E-06    | 9.01E-05    |
| NSFP1           | -7.595971165 | 1.10E-05    | 0.000181766 |
| PCDHB14         | -7.610353423 | 4.10E-05    | 0.000533109 |
| ARIH1           | -7.622923901 | 2.32E-09    | 9.23E-08    |
| NUDT4           | -7.623527688 | 6.75E-08    | 2.04E-06    |
| CAP2            | -7.631392466 | 6.34E-06    | 0.000114545 |
| LMLN            | -7.632698686 | 3.12E-06    | 6.14E-05    |
| AKR7A2          | -7.632920831 | 2.06E-05    | 0.000309758 |
| TECRP1          | -7.636089714 | 0.000969864 | 0.006035594 |
| GABBR1          | -7.636503819 | 9.02E-06    | 0.000154149 |
| ATG7            | -7.641891226 | 2.13E-11    | 9.86E-10    |
| DAB2            | -7.653470551 | 2.64E-11    | 1.22E-09    |
| FAM204A         | -7.660501557 | 2.87E-07    | 7.76E-06    |
| UBE2G2          | -7.663576022 | 3.10E-08    | 1.02E-06    |
| SYK             | -7.676792117 | 1.54E-10    | 6.81E-09    |
| VPS26B          | -7.677979737 | 2.98E-07    | 7.99E-06    |
| ENSG00000250461 | -7.679297734 | 1.49E-06    | 3.23E-05    |
| IGKV1D-39       | -7.680801214 | 0.008993981 | 0.033698278 |
| SDCBP           | -7.687118523 | 1.61E-14    | 1.19E-12    |
| METTL13         | -7.688796477 | 2.01E-06    | 4.19E-05    |
| MKKS            | -7.700139341 | 5.75E-08    | 1.77E-06    |
| RYBP            | -7.701134232 | 4.42E-08    | 1.39E-06    |
| ENSG00000262633 | -7.704915865 | 8.49E-09    | 3.09E-07    |
| COLGALT1        | -7.706243893 | 1.27E-06    | 2.83E-05    |
| FCGR2A          | -7.706766369 | 2.74E-06    | 5.48E-05    |
| EPB41L3         | -7.708201661 | 1.17E-06    | 2.62E-05    |
| DNAJC2          | -7.711958813 | 1.49E-09    | 6.03E-08    |
| MTA2            | -7.717173754 | 5.46E-12    | 2.61E-10    |
| USP14           | -7.72584661  | 5.61E-10    | 2.37E-08    |
| MLLT3           | -7.739489503 | 4.98E-09    | 1.89E-07    |

|                 |              |             |             |
|-----------------|--------------|-------------|-------------|
| SPATA6          | -7.742043905 | 2.46E-10    | 1.08E-08    |
| AHSA1           | -7.751240298 | 1.31E-08    | 4.60E-07    |
| RRN3P2          | -7.768262086 | 7.10E-07    | 1.73E-05    |
| RAB3GAP2        | -7.780928104 | 4.57E-09    | 1.74E-07    |
| VHL             | -7.782227311 | 7.61E-07    | 1.82E-05    |
| IGLV3-21        | -7.782748414 | 6.70E-05    | 0.000793732 |
| ZNF440          | -7.786627636 | 1.44E-05    | 0.000228831 |
| ADAMTS13        | -7.790999626 | 3.62E-08    | 1.16E-06    |
| RAB11FIP4       | -7.791869065 | 1.13E-12    | 5.96E-11    |
| BTN3A2          | -7.795229151 | 6.76E-07    | 1.66E-05    |
| MTAP            | -7.796122943 | 2.19E-07    | 6.07E-06    |
| CLCN5           | -7.807062361 | 3.16E-05    | 0.000438339 |
| PRKRA           | -7.816474784 | 1.35E-06    | 2.97E-05    |
| RBM8A           | -7.819435503 | 1.30E-06    | 2.87E-05    |
| RAI14           | -7.82580119  | 1.15E-07    | 3.35E-06    |
| TAF10           | -7.835609511 | 7.50E-07    | 1.80E-05    |
| MPHOSPH10       | -7.84130289  | 0.000219472 | 0.001941414 |
| ENSG00000241057 | -7.841656248 | 0.000479619 | 0.003478316 |
| UBA6            | -7.843325413 | 2.54E-12    | 1.25E-10    |
| CD59            | -7.844015265 | 6.00E-05    | 0.000727567 |
| EBAG9           | -7.844028219 | 5.23E-08    | 1.63E-06    |
| ARL8B           | -7.848217446 | 1.81E-10    | 7.96E-09    |
| ENSG00000277802 | -7.86386914  | 0.005708344 | 0.023743574 |
| ACOX2           | -7.864183966 | 5.05E-09    | 1.91E-07    |
| ENSG00000234353 | -7.868423407 | 3.19E-06    | 6.24E-05    |
| CD163L1         | -7.870439879 | 0.000920268 | 0.005792474 |
| ZNF826P         | -7.879114881 | 4.36E-07    | 1.11E-05    |
| RNASET2         | -7.882957288 | 2.34E-07    | 6.48E-06    |
| UTP14A          | -7.88460868  | 2.98E-05    | 0.000418554 |
| RAB18           | -7.889801722 | 2.57E-07    | 7.04E-06    |
| ZNF135          | -7.890545356 | 2.64E-10    | 1.15E-08    |
| GTF2H2C_2       | -7.894725595 | 1.27E-08    | 4.48E-07    |
| NPTN            | -7.894959903 | 2.70E-07    | 7.35E-06    |
| CASP8           | -7.900461224 | 1.86E-13    | 1.16E-11    |
| CDH6            | -7.902957106 | 1.36E-07    | 3.87E-06    |
| PHBP19          | -7.903001322 | 3.03E-07    | 8.06E-06    |
| ZNF98           | -7.94791889  | 8.66E-07    | 2.01E-05    |
| NGLY1           | -7.949184583 | 1.74E-16    | 1.73E-14    |
| SP3             | -7.962851565 | 3.87E-06    | 7.36E-05    |
| TAS2R31         | -7.969336744 | 4.16E-07    | 1.07E-05    |
| GGTLC3          | -7.970393544 | 0.000360919 | 0.002800365 |
| TXNDC5          | -7.970810966 | 2.03E-12    | 1.03E-10    |
| ACTR3C          | -7.971811452 | 0.000230768 | 0.002020754 |
| C17orf49        | -7.979100695 | 5.72E-07    | 1.43E-05    |

|           |              |             |             |
|-----------|--------------|-------------|-------------|
| IGFBP6    | -7.980751115 | 2.44E-07    | 6.74E-06    |
| IFT43     | -7.98100132  | 3.13E-08    | 1.02E-06    |
| BTN2A3P   | -7.982863622 | 6.87E-06    | 0.00012233  |
| TRAF3     | -7.984337788 | 3.21E-07    | 8.52E-06    |
| INTS13    | -7.98822107  | 9.40E-11    | 4.18E-09    |
| DLAT      | -7.992423873 | 1.37E-05    | 0.000220275 |
| ALG9      | -7.995168269 | 8.88E-09    | 3.21E-07    |
| RABGGTB   | -8.001020891 | 3.02E-12    | 1.47E-10    |
| PCDHA12   | -8.002662602 | 2.62E-05    | 0.000378503 |
| CLN8      | -8.012852926 | 7.08E-07    | 1.73E-05    |
| FANCI     | -8.016535381 | 1.21E-11    | 5.70E-10    |
| TMCO4     | -8.018997324 | 6.84E-10    | 2.87E-08    |
| RNASEH2B  | -8.02812328  | 2.45E-05    | 0.000359278 |
| ALDH6A1   | -8.028880602 | 2.80E-08    | 9.37E-07    |
| NUP153    | -8.037414678 | 3.90E-06    | 7.41E-05    |
| IGHV3-48  | -8.043049342 | 0.000129042 | 0.001299435 |
| HLA-DPB1  | -8.046365159 | 0.000219169 | 0.001941359 |
| MS4A1     | -8.064776151 | 0.000151219 | 0.001465455 |
| NEK1      | -8.072962091 | 3.42E-13    | 2.01E-11    |
| CAMK2D    | -8.07629257  | 1.22E-11    | 5.75E-10    |
| FOXRED1   | -8.077700087 | 4.03E-07    | 1.05E-05    |
| SMAD1     | -8.07920639  | 6.09E-07    | 1.51E-05    |
| PPIAP40   | -8.082845422 | 5.59E-07    | 1.40E-05    |
| LRSAM1    | -8.089753535 | 3.86E-07    | 1.01E-05    |
| GK3P      | -8.094062032 | 1.46E-05    | 0.000230765 |
| FBXO25    | -8.104301076 | 7.63E-09    | 2.82E-07    |
| ZNF208    | -8.121755063 | 6.39E-05    | 0.000763938 |
| PDLIM3    | -8.13363127  | 7.98E-07    | 1.89E-05    |
| PTPRC     | -8.140667962 | 1.30E-05    | 0.000211398 |
| NUS1P1    | -8.143360892 | 2.34E-09    | 9.30E-08    |
| FLI1      | -8.169013983 | 9.27E-10    | 3.85E-08    |
| CACHD1    | -8.176171618 | 3.25E-05    | 0.000445775 |
| PTP4A3    | -8.185929115 | 8.66E-09    | 3.14E-07    |
| TMEM106C  | -8.211839103 | 3.44E-10    | 1.49E-08    |
| FAN1      | -8.223042451 | 0.000466533 | 0.003403809 |
| NOTCH2NLA | -8.260298044 | 6.05E-08    | 1.85E-06    |
| FGF7P6    | -8.295635256 | 2.83E-08    | 9.45E-07    |
| MDH1      | -8.318483195 | 4.14E-14    | 2.98E-12    |
| FAH       | -8.320907894 | 8.01E-07    | 1.89E-05    |
| KIF2A     | -8.3259142   | 2.26E-11    | 1.04E-09    |
| RYR1      | -8.32833745  | 1.07E-05    | 0.000177394 |
| BCKDHA    | -8.337016519 | 1.51E-07    | 4.27E-06    |
| NADK      | -8.371933767 | 1.58E-07    | 4.45E-06    |
| RUNX2     | -8.387934973 | 5.18E-10    | 2.20E-08    |

|                 |              |             |             |
|-----------------|--------------|-------------|-------------|
| IGLV1-51        | -8.428135026 | 7.97E-07    | 1.89E-05    |
| ZNF69           | -8.450847929 | 0.001147448 | 0.006872198 |
| ZNF248          | -8.452245995 | 3.20E-12    | 1.54E-10    |
| GSR             | -8.458821751 | 4.19E-09    | 1.61E-07    |
| CHRNA7          | -8.459863529 | 4.09E-07    | 1.06E-05    |
| ZNF44           | -8.46568408  | 8.16E-09    | 2.98E-07    |
| DGKH            | -8.475608491 | 2.93E-15    | 2.27E-13    |
| TPTEP2-CSNK1E   | -8.536869698 | 0.00066958  | 0.00453277  |
| CENPJ           | -8.557147779 | 0.000221384 | 0.001953086 |
| BCL2L2-PABPN1   | -8.563563972 | 7.72E-06    | 0.000134969 |
| ENSG00000282034 | -8.578630714 | 0.000476041 | 0.003458587 |
| ANTXR1          | -8.596848417 | 6.83E-12    | 3.24E-10    |
| SLC37A1         | -8.599851685 | 1.25E-09    | 5.12E-08    |
| JAM3            | -8.615213638 | 2.67E-09    | 1.05E-07    |
| GABBR2          | -8.634705003 | 4.56E-10    | 1.95E-08    |
| BTN2A1          | -8.641436976 | 1.61E-10    | 7.10E-09    |
| JCHAIN          | -8.655856033 | 7.92E-07    | 1.88E-05    |
| IGHV3-23        | -8.656492021 | 0.000268578 | 0.002263835 |
| GPI             | -8.665405034 | 0.000237981 | 0.002067855 |
| C4B             | -8.673523042 | 0.000387548 | 0.002946535 |
| WASH9P          | -8.70286082  | 1.72E-08    | 5.97E-07    |
| IGHV3-11        | -8.716515686 | 2.19E-06    | 4.51E-05    |
| TRAM1           | -8.722302157 | 9.79E-25    | 3.20E-22    |
| TULP4           | -8.778220354 | 4.20E-13    | 2.41E-11    |
| WDR70           | -8.805524919 | 1.29E-09    | 5.26E-08    |
| HNRNPA1P48      | -8.813801381 | 2.58E-08    | 8.76E-07    |
| RPP14           | -8.828541424 | 2.78E-07    | 7.54E-06    |
| FMNL3           | -8.843945211 | 4.21E-15    | 3.22E-13    |
| ENAH            | -9.003434719 | 1.04E-13    | 6.88E-12    |
| BMS1P15         | -9.006438162 | 2.32E-05    | 0.000343212 |
| IGKV3-11        | -9.049497839 | 0.000172053 | 0.001603178 |
| NPIPA1          | -9.165596075 | 2.65E-16    | 2.43E-14    |
| PMS2P6          | -9.169864735 | 7.74E-08    | 2.31E-06    |
| NUP85           | -9.19949465  | 4.29E-14    | 3.08E-12    |
| RNF128          | -9.263528857 | 3.34E-05    | 0.000456368 |
| GTF2IP12        | -9.283603834 | 5.80E-14    | 4.10E-12    |
| GOLGA6L9        | -9.354835389 | 3.28E-06    | 6.38E-05    |
| RPE             | -9.478416894 | 1.96E-12    | 9.98E-11    |
| RPL9            | -9.509708446 | 5.96E-09    | 2.22E-07    |
| AGAP12P         | -9.583822291 | 3.63E-07    | 9.56E-06    |
| TBC1D3I         | -9.769616107 | 0.00022645  | 0.001989075 |
| IGHV3-7         | -9.850375515 | 2.00E-05    | 0.000301839 |
| FAM86B1         | -10.06050365 | 3.77E-06    | 7.20E-05    |
| WASH7P          | -10.54106027 | 5.12E-08    | 1.60E-06    |

|                 |              |          |          |
|-----------------|--------------|----------|----------|
| AGAP10P         | -10.84845473 | 3.69E-09 | 1.42E-07 |
| IGKV1-16        | -10.97410754 | 5.30E-07 | 1.34E-05 |
| IGLC3           | -11.37656039 | 2.39E-12 | 1.18E-10 |
| C4B             | -11.40561144 | 1.73E-08 | 6.00E-07 |
| TEAD1           | -11.51472184 | 6.03E-12 | 2.87E-10 |
| IGKV1-5         | -12.89978581 | 2.38E-09 | 9.41E-08 |
| ABHD16A         | -18.64551523 | 2.58E-10 | 1.13E-08 |
| FAM86JP         | -19.31214319 | 2.97E-12 | 1.45E-10 |
| MGMT            | -19.91809952 | 6.04E-13 | 3.34E-11 |
| PHGDH           | -20.22964612 | 3.47E-13 | 2.02E-11 |
| IGHV1-46        | -20.57593069 | 3.03E-12 | 1.47E-10 |
| DENND10P1       | -20.64470202 | 2.56E-12 | 1.26E-10 |
| TBC1D3I         | -20.64934927 | 2.53E-12 | 1.25E-10 |
| GOLGA8Q         | -20.68855227 | 2.30E-12 | 1.15E-10 |
| IGKV1-8         | -20.69949017 | 2.24E-12 | 1.13E-10 |
| IGHV7-4-1       | -20.72186452 | 2.12E-12 | 1.07E-10 |
| LRP1B           | -20.78972374 | 1.78E-12 | 9.16E-11 |
| FAM86GP         | -20.79032461 | 1.79E-12 | 9.19E-11 |
| PPIAP19         | -20.82123629 | 1.66E-12 | 8.59E-11 |
| MSN             | -20.85698592 | 1.52E-12 | 7.89E-11 |
| IGKV2-28        | -20.86831583 | 1.48E-12 | 7.71E-11 |
| FLG2            | -20.95367226 | 1.20E-12 | 6.27E-11 |
| SRGAP2C         | -20.95459747 | 1.19E-12 | 6.27E-11 |
| ENSG00000278066 | -21.02953815 | 9.92E-13 | 5.27E-11 |
| SPDYE2B         | -21.03726588 | 9.57E-13 | 5.10E-11 |
| IGKV2D-30       | -21.04365351 | 9.57E-13 | 5.10E-11 |
| USP17L3         | -21.08275617 | 8.69E-13 | 4.67E-11 |
| C2              | -21.0870009  | 8.59E-13 | 4.64E-11 |
| ENSG00000260537 | -21.08752599 | 8.57E-13 | 4.64E-11 |
| SFRP1           | -21.09571931 | 8.41E-13 | 4.59E-11 |
| GGTLC5P         | -21.14052215 | 7.52E-13 | 4.12E-11 |
| IGHV4-34        | -21.19802181 | 6.51E-13 | 3.58E-11 |
| NCF1C           | -21.21532589 | 9.71E-15 | 7.26E-13 |
| NOL4            | -21.24738991 | 5.76E-13 | 3.20E-11 |
| HLA-DPB1        | -21.31797427 | 4.82E-13 | 2.71E-11 |
| STRIP2          | -21.33518498 | 4.62E-13 | 2.61E-11 |
| IGKV1D-12       | -21.34750332 | 4.48E-13 | 2.54E-11 |
| CNTNAP3P2       | -21.35872637 | 4.35E-13 | 2.48E-11 |
| CYP21A1P        | -21.42638529 | 3.67E-13 | 2.11E-11 |
| ZNF804B         | -21.42792326 | 3.65E-13 | 2.11E-11 |
| ALOX5           | -21.45286654 | 3.43E-13 | 2.01E-11 |
| TNXA            | -21.45563051 | 3.41E-13 | 2.01E-11 |
| DDT             | -21.45723399 | 3.39E-13 | 2.01E-11 |
| PKP2            | -21.47524942 | 3.21E-13 | 1.92E-11 |

|                 |              |          |          |
|-----------------|--------------|----------|----------|
| CETP            | -21.50062531 | 3.04E-13 | 1.82E-11 |
| PSG1            | -21.50529186 | 3.00E-13 | 1.81E-11 |
| SH3BGR          | -21.50644985 | 2.99E-13 | 1.81E-11 |
| RGL1            | -21.51831026 | 2.91E-13 | 1.77E-11 |
| TNFRSF11A       | -21.52072791 | 2.89E-13 | 1.77E-11 |
| IGHV4-39        | -21.55117248 | 2.67E-13 | 1.64E-11 |
| ENSG00000284128 | -21.57637472 | 2.51E-13 | 1.55E-11 |
| SLC7A5          | -21.59980356 | 2.37E-13 | 1.47E-11 |
| BBOF1           | -21.63271449 | 3.00E-20 | 5.01E-18 |
| BAG6            | -21.65135042 | 9.02E-18 | 1.11E-15 |
| IGKV1-6         | -21.69349466 | 1.86E-13 | 1.16E-11 |
| COLEC11         | -21.69566722 | 1.85E-13 | 1.16E-11 |
| HLA-DRB1        | -21.69768065 | 4.73E-15 | 3.60E-13 |
| MRPS9           | -21.69845674 | 1.84E-13 | 1.16E-11 |
| PPIAP26         | -21.73841686 | 1.66E-13 | 1.06E-11 |
| USP17L1         | -21.80288696 | 1.41E-13 | 9.05E-12 |
| IGHV2-5         | -21.80304539 | 1.41E-13 | 9.05E-12 |
| FAM90A1         | -21.84716343 | 1.26E-13 | 8.17E-12 |
| LRRC37A         | -21.89599636 | 1.11E-13 | 7.24E-12 |
| HLA-DQA2        | -21.89764834 | 1.10E-13 | 7.24E-12 |
| DNAH2           | -21.92903609 | 1.30E-15 | 1.06E-13 |
| CLDN16          | -21.95376486 | 9.54E-14 | 6.34E-12 |
| ENSG00000255556 | -21.9715074  | 9.11E-14 | 6.09E-12 |
| PLP1            | -21.97721543 | 8.99E-14 | 6.04E-12 |
| IGLL5           | -21.98593836 | 8.78E-14 | 5.97E-12 |
| ENSG00000277125 | -22.00881461 | 8.27E-14 | 5.66E-12 |
| IGHV3-7         | -22.01765955 | 8.09E-14 | 5.56E-12 |
| LMOD1           | -22.02062446 | 8.02E-14 | 5.55E-12 |
| ABCB1           | -22.02431652 | 8.04E-16 | 6.76E-14 |
| EXO1            | -22.0681102  | 7.09E-14 | 4.93E-12 |
| C19orf33        | -22.07166323 | 7.03E-14 | 4.92E-12 |
| IGHV3-20        | -22.08384105 | 6.81E-14 | 4.79E-12 |
| ANKRD20A4P      | -22.12573758 | 1.30E-15 | 1.06E-13 |
| NOSTRIN         | -22.19291277 | 1.06E-15 | 8.80E-14 |
| IGKV1D-13       | -22.23511542 | 1.92E-15 | 1.54E-13 |
| AKR1E2          | -22.26983382 | 2.23E-18 | 2.94E-16 |
| PRDX1           | -22.29007239 | 3.98E-14 | 2.88E-12 |
| MAMLD1          | -22.29124242 | 6.28E-16 | 5.35E-14 |
| ENSG00000266997 | -22.29451734 | 1.43E-15 | 1.16E-13 |
| KIF17           | -22.3015739  | 2.44E-16 | 2.29E-14 |
| CFAP47          | -22.30292935 | 2.39E-16 | 2.26E-14 |
| CD3E            | -22.30407994 | 7.27E-16 | 6.15E-14 |
| IGF1            | -22.31543401 | 2.93E-16 | 2.67E-14 |
| MYO15A          | -22.36342152 | 2.64E-16 | 2.43E-14 |

|                 |              |          |          |
|-----------------|--------------|----------|----------|
| AURKC           | -22.37555232 | 3.02E-16 | 2.71E-14 |
| TSEN54          | -22.39389154 | 1.79E-16 | 1.76E-14 |
| IGKV3D-20       | -22.4079699  | 2.92E-14 | 2.13E-12 |
| PCDHA2          | -22.40982766 | 1.38E-15 | 1.12E-13 |
| CYP2S1          | -22.41909958 | 1.82E-16 | 1.78E-14 |
| SAMD8           | -22.42429151 | 3.61E-22 | 8.91E-20 |
| EEF1B2P1        | -22.45994713 | 2.55E-16 | 2.38E-14 |
| NCF4            | -22.47074839 | 1.89E-16 | 1.82E-14 |
| PNMA6B          | -22.52183226 | 8.88E-23 | 2.34E-20 |
| LSS             | -22.53589922 | 1.74E-19 | 2.45E-17 |
| IGKV1OR2-1      | -22.56941509 | 1.31E-16 | 1.38E-14 |
| TSEN34          | -22.58575741 | 2.35E-16 | 2.24E-14 |
| IGKV2-30        | -22.59757733 | 1.47E-16 | 1.49E-14 |
| ENSG00000249624 | -22.61803549 | 1.46E-19 | 2.13E-17 |
| SNX29P2         | -22.66183542 | 5.01E-16 | 4.33E-14 |
| IGKV1D-16       | -22.67378193 | 8.36E-19 | 1.12E-16 |
| VAMP5           | -22.69824877 | 5.00E-16 | 4.33E-14 |
| CDADC1          | -22.69985496 | 9.40E-20 | 1.41E-17 |
| USP17L4         | -22.72422044 | 1.26E-14 | 9.39E-13 |
| CD274           | -22.74617237 | 1.85E-16 | 1.79E-14 |
| ENSG00000254979 | -22.74855837 | 2.01E-19 | 2.79E-17 |
| AMY1A           | -22.75374511 | 3.68E-16 | 3.22E-14 |
| ENSG00000256210 | -22.75382713 | 1.38E-16 | 1.43E-14 |
| GRAP            | -22.75400819 | 8.77E-17 | 9.74E-15 |
| MIS12           | -22.76033032 | 1.55E-19 | 2.23E-17 |
| HSPE1-MOB4      | -22.80017098 | 1.05E-16 | 1.13E-14 |
| FAM90A2P        | -22.80620611 | 1.86E-21 | 4.09E-19 |
| KDELR3          | -22.83465212 | 7.44E-20 | 1.13E-17 |
| FAM106A         | -22.8347046  | 7.95E-17 | 8.99E-15 |
| TMTC1           | -22.85830888 | 8.04E-23 | 2.21E-20 |
| KLRC4-KLRK1     | -22.85928253 | 1.12E-16 | 1.19E-14 |
| SRGN            | -22.88970173 | 2.90E-19 | 3.94E-17 |
| IGHV1-3         | -22.91871233 | 8.70E-23 | 2.34E-20 |
| FAM90A20P       | -22.92923255 | 9.63E-17 | 1.06E-14 |
| ACOT2           | -22.93273    | 1.02E-16 | 1.11E-14 |
| NAMPT           | -22.94123311 | 5.20E-20 | 8.28E-18 |
| NSFP1           | -22.9505605  | 2.01E-22 | 5.07E-20 |
| UBASH3B         | -22.99177737 | 1.24E-19 | 1.83E-17 |
| IKBKG           | -23.00080392 | 2.43E-23 | 6.84E-21 |
| PGA3            | -23.0182236  | 5.75E-15 | 4.32E-13 |
| NUTM2E          | -23.03816632 | 8.31E-17 | 9.32E-15 |
| RPSAP58         | -23.04891258 | 6.31E-20 | 9.80E-18 |
| TWINK           | -23.06194904 | 3.62E-20 | 5.84E-18 |
| PGAM1           | -23.08963628 | 1.74E-23 | 5.02E-21 |

|                 |              |          |          |
|-----------------|--------------|----------|----------|
| IGHV5-51        | -23.09237488 | 1.73E-16 | 1.73E-14 |
| TAS2R31         | -23.10418532 | 2.06E-20 | 3.56E-18 |
| TUBBP5          | -23.12249767 | 9.90E-17 | 1.08E-14 |
| CD84            | -23.14054129 | 1.63E-19 | 2.32E-17 |
| USP17L30        | -23.16208398 | 3.89E-15 | 3.00E-13 |
| IGHV3-53        | -23.18750841 | 1.01E-15 | 8.43E-14 |
| ENSG00000249319 | -23.23677532 | 7.26E-21 | 1.46E-18 |
| STAG3L1         | -23.23998406 | 1.05E-20 | 1.93E-18 |
| CKMT1A          | -23.2470531  | 5.17E-17 | 6.02E-15 |
| IGKV1D-33       | -23.26792668 | 2.92E-15 | 2.27E-13 |
| C1orf21         | -23.28629855 | 1.82E-20 | 3.20E-18 |
| IGHV3-73        | -23.3048948  | 3.01E-16 | 2.71E-14 |
| KIFAP3          | -23.30764718 | 7.00E-20 | 1.07E-17 |
| TBC1D3L         | -23.31469111 | 2.57E-15 | 2.02E-13 |
| ENSG00000280852 | -23.31622273 | 1.28E-20 | 2.31E-18 |
| ENSG00000281561 | -23.31988264 | 5.48E-20 | 8.62E-18 |
| AMY1C           | -23.32639059 | 4.11E-22 | 9.95E-20 |
| IGHD            | -23.35557031 | 3.56E-20 | 5.83E-18 |
| MT1X            | -23.36283655 | 1.32E-20 | 2.34E-18 |
| APOE            | -23.38124155 | 5.72E-24 | 1.73E-21 |
| GPC6            | -23.38414739 | 2.13E-15 | 1.69E-13 |
| RAB6B           | -23.40014968 | 3.18E-27 | 1.84E-24 |
| ENSG00000233170 | -23.55209756 | 8.19E-21 | 1.60E-18 |
| NOTCH4          | -23.57765393 | 8.55E-21 | 1.64E-18 |
| ENSG00000161103 | -23.62627358 | 1.63E-16 | 1.64E-14 |
| RPS26P11        | -23.65689296 | 3.72E-27 | 2.05E-24 |
| ENSG00000263020 | -23.66335064 | 1.25E-27 | 7.54E-25 |
| SIGLEC10        | -23.6798181  | 2.35E-28 | 1.77E-25 |
| NTM             | -23.69360332 | 2.94E-25 | 1.11E-22 |
| ZNF658B         | -23.70979752 | 4.52E-31 | 6.07E-28 |
| COL11A1         | -23.71409019 | 1.62E-23 | 4.77E-21 |
| TYW1B           | -23.78663684 | 1.31E-24 | 4.18E-22 |
| FADS2           | -23.81032213 | 5.58E-29 | 5.19E-26 |
| HLA-DRB1        | -23.84451033 | 5.95E-16 | 5.11E-14 |
| TNXB            | -23.8518348  | 3.02E-20 | 5.01E-18 |
| SERF1A          | -23.86714632 | 6.68E-27 | 3.26E-24 |
| ALS2            | -23.89531231 | 2.57E-20 | 4.37E-18 |
| PPIAP51         | -23.92526559 | 8.84E-25 | 2.97E-22 |
| KRT87P          | -23.95726449 | 7.92E-26 | 3.55E-23 |
| CCL4L2          | -23.967578   | 2.34E-24 | 7.27E-22 |
| TNXB            | -24.02448252 | 2.81E-21 | 5.96E-19 |
| IGHV1-46        | -24.03113863 | 3.16E-17 | 3.79E-15 |
| IMPDH1          | -24.04931068 | 3.86E-29 | 3.89E-26 |
| GOLGA80         | -24.07730722 | 7.92E-17 | 8.99E-15 |



|                 |              |          |          |
|-----------------|--------------|----------|----------|
| IGHV4-39        | -24.08429947 | 3.04E-16 | 2.71E-14 |
| SLX4            | -24.11866389 | 4.62E-28 | 3.11E-25 |
| FRMPD2B         | -24.15767457 | 8.21E-26 | 3.55E-23 |
| IGHV3-13        | -24.18594312 | 4.04E-21 | 8.44E-19 |
| CEP63           | -24.19137289 | 1.19E-21 | 2.73E-19 |
| NT5C3A          | -24.22169473 | 2.81E-25 | 1.10E-22 |
| IGHV3-66        | -24.28226077 | 1.11E-25 | 4.63E-23 |
| DPY19L2P2       | -24.31382293 | 6.24E-21 | 1.28E-18 |
| AGAP4           | -24.38360667 | 4.48E-26 | 2.09E-23 |
| MUC20           | -24.43277044 | 7.11E-29 | 5.74E-26 |
| ENSG00000198211 | -24.47273062 | 5.51E-25 | 1.91E-22 |
| TNXB            | -24.59148823 | 1.23E-25 | 4.97E-23 |
| ZNF225          | -24.62401682 | 3.53E-31 | 5.34E-28 |
| CASP4           | -24.62759827 | 1.87E-30 | 2.06E-27 |
| CLCNKB          | -24.82118718 | 7.90E-21 | 1.57E-18 |
| SMN2            | -24.89478293 | 2.13E-21 | 4.60E-19 |
| IGKV3-15        | -24.93386947 | 9.89E-21 | 1.85E-18 |
| USP17L22        | -24.94744487 | 2.57E-17 | 3.11E-15 |
| IGHV1-69D       | -24.94924749 | 8.83E-22 | 2.05E-19 |
| MCCC2           | -25.00898867 | 4.41E-25 | 1.57E-22 |
| ENSG00000267740 | -25.02167051 | 4.15E-25 | 1.52E-22 |
| IGLV2-8         | -25.03158279 | 3.18E-31 | 5.34E-28 |
| GBP2            | -25.06461801 | 2.58E-28 | 1.84E-25 |
| IGHV1-2         | -25.20022657 | 6.55E-29 | 5.66E-26 |
| IGHV3-15        | -25.21093474 | 1.65E-21 | 3.70E-19 |
| GOLGA8N         | -25.21425166 | 7.17E-39 | 2.89E-35 |
| IGHV1-18        | -25.26957996 | 8.61E-18 | 1.07E-15 |
| IGHV3-74        | -25.32055379 | 6.73E-27 | 3.26E-24 |
| GOLGA8M         | -25.49279606 | 5.16E-18 | 6.57E-16 |
| ENSG00000278082 | -25.59073233 | 4.25E-22 | 1.01E-19 |
| IGHGP           | -25.70975925 | 2.70E-18 | 3.51E-16 |
| IGKV1-9         | -25.85392793 | 1.12E-27 | 7.11E-25 |
| SELENON         | -26.01930999 | 9.42E-35 | 2.85E-31 |
| IGKV1-33        | -26.21564108 | 1.83E-22 | 4.70E-20 |
| IGKV1-17        | -26.34775493 | 6.60E-27 | 3.26E-24 |
| IGLV2-23        | -27.22971786 | 1.41E-33 | 3.42E-30 |
| IGLV2-14        | -27.70033901 | 1.96E-42 | 2.38E-38 |
| IGKV1-39        | -27.80176336 | 4.23E-33 | 8.54E-30 |
| LRRC37A3        | -28.00707455 | 3.73E-40 | 2.26E-36 |

**Supplementary Table-S5:** Differentially expressed genes in *Cutibacterium acne* high versus low sub-group of anaplastic thyroid cancer samples (n=30). Padj is p-values, adjusted for multiple testing with the Benjamini-Hochberg procedure.

| Gene name | log2FoldChange | pvalue | padj |
|-----------|----------------|--------|------|
|-----------|----------------|--------|------|

|                 |          |          |          |
|-----------------|----------|----------|----------|
| POTEE           | 30       | 7.15E-19 | 2.06E-16 |
| MYO5BP1         | 28.6535  | 2.45E-17 | 5.00E-15 |
| FAM90A24P       | 28.43761 | 4.25E-17 | 7.71E-15 |
| TRPM1           | 27.62053 | 3.35E-16 | 4.12E-14 |
| GTF2IP20        | 27.61689 | 3.37E-16 | 4.12E-14 |
| REXO1L1P        | 26.7711  | 2.69E-15 | 2.39E-13 |
| ENSG00000257175 | 26.59888 | 4.09E-15 | 3.52E-13 |
| IGSF8           | 26.30813 | 8.41E-15 | 6.86E-13 |
| SPATA31D5P      | 26.04483 | 1.55E-14 | 1.25E-12 |
| AMPH            | 25.97162 | 1.85E-14 | 1.44E-12 |
| CMTM3           | 25.94926 | 1.92E-14 | 1.47E-12 |
| ENSG00000246203 | 25.85827 | 2.41E-14 | 1.81E-12 |
| AGAP7P          | 25.63136 | 4.09E-14 | 3.04E-12 |
| FAM27E3         | 25.36934 | 7.48E-14 | 5.31E-12 |
| ENSG00000253882 | 25.22506 | 1.05E-13 | 7.34E-12 |
| ENSG00000196656 | 25.20389 | 1.11E-13 | 7.63E-12 |
| LILRB4          | 25.20196 | 1.12E-13 | 7.63E-12 |
| PYROXD1         | 25.02497 | 1.69E-13 | 1.12E-11 |
| UBE2V1P1        | 25.01316 | 1.70E-13 | 1.12E-11 |
| ACAP3           | 24.96695 | 1.87E-13 | 1.22E-11 |
| POM121L9P       | 24.93659 | 2.02E-13 | 1.30E-11 |
| LILRB4          | 24.90988 | 2.15E-13 | 1.37E-11 |
| CCN4            | 24.78466 | 2.73E-13 | 1.72E-11 |
| LILRB4          | 24.67774 | 3.62E-13 | 2.24E-11 |
| ALPL            | 24.6626  | 3.79E-13 | 2.32E-11 |
| CPT1A           | 24.612   | 4.30E-13 | 2.60E-11 |
| PTHLH           | 24.55325 | 4.85E-13 | 2.90E-11 |
| TSC22D2         | 24.4786  | 5.61E-13 | 3.31E-11 |
| H2AZ1           | 24.44093 | 5.86E-13 | 3.42E-11 |
| DIPK2A          | 24.42619 | 6.33E-13 | 3.65E-11 |
| ENSG00000225871 | 24.34174 | 7.59E-13 | 4.33E-11 |
| PLA1A           | 24.32136 | 7.90E-13 | 4.45E-11 |
| PPP2R3A         | 24.26934 | 8.83E-13 | 4.92E-11 |
| RAB15           | 24.13364 | 1.20E-12 | 6.61E-11 |
| EEFSEC          | 24.13272 | 1.22E-12 | 6.63E-11 |
| FAM110B         | 23.85697 | 2.19E-12 | 1.18E-10 |
| GOLGA6L10       | 14.82497 | 1.07E-05 | 0.000568 |
| DUX4L19         | 12.11562 | 0.000317 | 0.014364 |
| OSBPL5          | 12.01442 | 0.000353 | 0.015584 |
| GAPDHP61        | 11.83179 | 0.000377 | 0.016361 |
| PIEZO1          | 11.80675 | 0.000358 | 0.015661 |
| HABP2           | 11.67335 | 0.000577 | 0.023956 |
| FLG2            | 11.62419 | 0.000161 | 0.007641 |
| PKD1P5          | 11.5426  | 0.000533 | 0.022506 |

|                 |          |          |          |
|-----------------|----------|----------|----------|
| FAM205BP        | 11.39178 | 0.000757 | 0.030075 |
| EPS8L1          | 11.28576 | 0.000797 | 0.030902 |
| TRAF2           | 11.17716 | 0.000799 | 0.030902 |
| OR4F7P          | 10.98756 | 0.001138 | 0.041312 |
| ALG2            | 10.92287 | 0.000137 | 0.006706 |
| MCTP2           | 10.67409 | 0.001558 | 0.054517 |
| SUCLA2P1        | 10.50172 | 0.001825 | 0.061245 |
| SUCLA2P1        | 10.50172 | 0.001825 | 0.061245 |
| RPSAP2          | 10.05529 | 0.002851 | 0.086508 |
| SERINC2         | 10.0405  | 0.002897 | 0.086519 |
| PRLR            | 9.997701 | 0.002944 | 0.086519 |
| SHMT1           | 9.99329  | 0.001811 | 0.061245 |
| NOS3            | 9.972923 | 0.002804 | 0.086403 |
| TTC31           | 9.919204 | 0.003088 | 0.089534 |
| DDT             | 9.808056 | 0.003355 | 0.09613  |
| DMBT1           | 9.786505 | 0.003693 | 0.10399  |
| CCDC88B         | 9.758439 | 0.002765 | 0.08574  |
| TFIP11          | 9.722446 | 0.004202 | 0.114999 |
| HAVCR2          | 9.643832 | 0.004238 | 0.114999 |
| SNX29P2         | 9.640091 | 0.004078 | 0.113526 |
| CCNE1           | 9.637477 | 0.004257 | 0.114999 |
| ELP4            | 9.627316 | 0.001097 | 0.040394 |
| ALOX5           | 9.553998 | 0.004601 | 0.121217 |
| ALDH5A1         | 9.523841 | 0.004449 | 0.117833 |
| KLHL29          | 9.433163 | 0.004971 | 0.127527 |
| AHCYL2          | 9.385253 | 0.001939 | 0.06333  |
| ENSG00000286220 | 9.37374  | 0.005365 | 0.136209 |
| MAN1B1          | 9.366737 | 0.004861 | 0.126038 |
| FBXL15          | 9.360027 | 0.005517 | 0.138631 |
| RPL12P4         | 9.319974 | 0.005724 | 0.142045 |
| SYNE4           | 9.31922  | 0.005728 | 0.142045 |
| PPP2R2B         | 9.229869 | 0.006109 | 0.147464 |
| MYO1E           | 9.220118 | 0.003235 | 0.093234 |
| CYP21A1P        | 9.148513 | 0.006381 | 0.148174 |
| TXNDC2          | 9.111569 | 0.006915 | 0.1575   |
| GLI2            | 9.107992 | 0.006702 | 0.154903 |
| KANSL1L         | 9.072157 | 0.006358 | 0.148174 |
| MECR            | 9.056644 | 0.007267 | 0.161837 |
| DNAJC6          | 9.007113 | 0.006943 | 0.1575   |
| WWP1P1          | 8.997062 | 0.007667 | 0.168101 |
| PDPN            | 8.986976 | 0.007719 | 0.168101 |
| FCAR            | 8.971778 | 0.007299 | 0.161837 |
| CHD1L           | 8.954484 | 0.007916 | 0.170506 |
| CEACAM5         | 8.949587 | 0.007124 | 0.159397 |

|                 |          |          |          |
|-----------------|----------|----------|----------|
| WDR81           | 8.926924 | 0.00816  | 0.17087  |
| ENSG00000226268 | 8.888956 | 0.008438 | 0.173007 |
| TFCP2           | 8.870061 | 0.006023 | 0.146102 |
| LYAR            | 8.861636 | 0.008145 | 0.17087  |
| GALNT11         | 8.838298 | 0.00883  | 0.175197 |
| AREG            | 8.835756 | 0.007999 | 0.170506 |
| NETO1           | 8.818548 | 0.008977 | 0.175197 |
| MCMD2           | 8.818548 | 0.008977 | 0.175197 |
| HDGFL3P1        | 8.818548 | 0.008977 | 0.175197 |
| ZNF75BP         | 8.818548 | 0.008977 | 0.175197 |
| ANKRD20A21P     | 8.778435 | 0.009296 | 0.175197 |
| BBS1            | 8.777922 | 0.009286 | 0.175197 |
| RFC2            | 8.774425 | 0.0062   | 0.148174 |
| WDR17           | 8.755008 | 0.009499 | 0.176308 |
| ENSG00000283963 | 8.754079 | 0.006263 | 0.148174 |
| LRRC66          | 8.726817 | 0.009109 | 0.175197 |
| PSPN            | 8.716595 | 0.009809 | 0.179343 |
| ABHD12          | 8.71245  | 0.009955 | 0.180668 |
| RPL39           | 8.686652 | 0.009789 | 0.179343 |
| SCN11A          | 8.668882 | 0.010221 | 0.181497 |
| CEP131          | 8.661547 | 0.010008 | 0.180948 |
| ADGRB3          | 8.634772 | 0.009472 | 0.176308 |
| SIRPB2          | 8.616912 | 0.010682 | 0.183581 |
| ARID3B          | 8.614658 | 0.010715 | 0.183581 |
| STK31           | 8.601439 | 0.010815 | 0.184641 |
| IQSEC2          | 8.585444 | 0.010978 | 0.185491 |
| ZNF747          | 8.578195 | 0.010639 | 0.183561 |
| PANK4           | 8.543782 | 0.008915 | 0.175197 |
| EVI5            | 8.535936 | 0.007939 | 0.170506 |
| YWHAQP5         | 8.532824 | 0.011481 | 0.18878  |
| SIPA1L2         | 8.529567 | 0.011427 | 0.18878  |
| PRIM1           | 8.510628 | 0.011778 | 0.18908  |
| PEX7            | 8.499712 | 0.011808 | 0.18908  |
| ARMC3           | 8.499712 | 0.011808 | 0.18908  |
| TXN2P1          | 8.499712 | 0.011808 | 0.18908  |
| ENSG00000280171 | 8.499712 | 0.011808 | 0.18908  |
| ADAMTS7         | 8.498454 | 0.011172 | 0.187472 |
| REXO1L6P        | 8.493668 | 0.011894 | 0.189218 |
| GTF2A1          | 8.479409 | 0.011996 | 0.190233 |
| RNASE10         | 8.477034 | 0.003418 | 0.097366 |
| WNT5A           | 8.462969 | 0.012148 | 0.191401 |
| HARS2           | 8.441385 | 0.012403 | 0.194791 |
| COL24A1         | 8.413605 | 0.01275  | 0.195907 |
| ATG12P2         | 8.404568 | 0.012794 | 0.195907 |

|                 |          |          |          |
|-----------------|----------|----------|----------|
| ATRN1           | 8.404568 | 0.012794 | 0.195907 |
| FOXN4           | 8.404568 | 0.012794 | 0.195907 |
| BCL2L14         | 8.399181 | 0.009233 | 0.175197 |
| ENSG00000218426 | 8.388633 | 0.001903 | 0.062592 |
| CAMK2G          | 8.350985 | 0.00221  | 0.070779 |
| FOXA1           | 8.336213 | 0.013547 | 0.19951  |
| ABO             | 8.333816 | 0.013574 | 0.19951  |
| AKR1B10         | 8.333816 | 0.013574 | 0.19951  |
| USP12P1         | 8.333816 | 0.013574 | 0.19951  |
| BRIP1           | 8.330021 | 0.013617 | 0.19951  |
| DCAF15          | 8.320631 | 0.013731 | 0.19951  |
| PRR23C          | 8.314945 | 0.013108 | 0.19702  |
| ATF6B           | 8.313077 | 0.013811 | 0.19951  |
| CD200R1         | 8.309887 | 0.013771 | 0.19951  |
| FIBCD1          | 8.300477 | 0.013956 | 0.19951  |
| ENSG00000212952 | 8.300477 | 0.013956 | 0.19951  |
| ENSG00000254506 | 8.300477 | 0.013956 | 0.19951  |
| PRAMEF22        | 8.300477 | 0.013956 | 0.19951  |
| PYGO1           | 8.299263 | 0.01397  | 0.19951  |
| CCDC175         | 8.294355 | 0.014034 | 0.19951  |
| RNFT1           | 8.288543 | 0.010518 | 0.183207 |
| ENSG00000278594 | 8.287634 | 0.014106 | 0.199762 |
| TOMM40P2        | 8.269134 | 0.014325 | 0.200754 |
| CDC27P3         | 8.260306 | 0.014429 | 0.200962 |
| TMEM39B         | 8.259042 | 0.01434  | 0.200754 |
| FOXK2           | 8.256471 | 0.009643 | 0.177858 |
| EVC2            | 8.249417 | 0.014559 | 0.200962 |
| TTI2            | 8.238519 | 0.01467  | 0.201349 |
| SHMT2           | 8.235287 | 0.014752 | 0.201705 |
| LRIG3           | 8.229277 | 0.009194 | 0.175197 |
| CFAP20DC        | 8.218846 | 0.008692 | 0.175197 |
| ZNF774          | 8.208436 | 0.009046 | 0.175197 |
| FAM86B1         | 8.205314 | 0.014509 | 0.200962 |
| ALKBH4          | 8.204518 | 0.010192 | 0.181497 |
| CARD9           | 8.203315 | 0.015223 | NA       |
| POLRMTP1        | 8.189572 | 0.015296 | 0.205344 |
| GOLGA6L10       | 8.18516  | 0.01349  | 0.19951  |
| QSER1           | 8.17893  | 0.008006 | 0.170506 |
| TCAF1           | 8.156192 | 0.015734 | 0.206767 |
| AKR7A2P1        | 8.154757 | 0.01574  | 0.206767 |
| ZRANB3          | 8.151402 | 0.012984 | 0.19702  |
| AMPD3           | 8.128877 | 0.006317 | 0.148174 |
| TESMIN          | 8.110041 | 0.016338 | 0.21123  |
| CCNB3P1         | 8.085523 | 0.016656 | 0.21477  |

|                 |          |          |          |
|-----------------|----------|----------|----------|
| CLUHP3          | 8.071531 | 0.016846 | NA       |
| GNA13           | 8.060892 | 0.016993 | NA       |
| HIF3A           | 8.057124 | 0.017045 | NA       |
| GAD2            | 8.057124 | 0.017045 | NA       |
| FOXH1           | 8.057124 | 0.017045 | NA       |
| TTC16           | 8.057124 | 0.017045 | NA       |
| EIF4A1P5        | 8.057124 | 0.017045 | NA       |
| ENGASE          | 8.05697  | 0.017076 | NA       |
| NR4A3           | 8.047968 | 0.0169   | 0.216305 |
| RBM14-RBM4      | 8.035687 | 0.017343 | NA       |
| SFXN4           | 8.03567  | 0.017305 | NA       |
| ZC3H12D         | 8.026732 | 0.017484 | NA       |
| CD74            | 8.019299 | 0.015578 | 0.206527 |
| CCND1           | 8.017856 | 0.017593 | NA       |
| TRIB3           | 8.010686 | 0.017685 | 0.223338 |
| DNAJC22         | 7.995348 | 0.003999 | 0.111978 |
| KIF24           | 7.988747 | 0.015847 | 0.207072 |
| PPIF            | 7.987132 | 0.01804  | NA       |
| TDRD10          | 7.9808   | 0.018133 | NA       |
| IDSP1           | 7.974683 | 0.017916 | 0.225676 |
| TMEM163         | 7.973707 | 0.018234 | NA       |
| ZHX3            | 7.969468 | 0.000691 | 0.028222 |
| SHC2            | 7.969173 | 0.01826  | 0.228838 |
| ACSS1           | 7.956702 | 0.018485 | NA       |
| AHI1            | 7.947117 | 0.018533 | 0.230103 |
| LZTR1           | 7.936474 | 0.018763 | NA       |
| TBXAS1          | 7.935251 | 0.018807 | 0.230103 |
| PPP1R1B         | 7.935251 | 0.018807 | 0.230103 |
| TUBG1           | 7.932154 | 0.009194 | 0.175197 |
| TLE6            | 7.926265 | 0.018943 | NA       |
| EIF3G           | 7.923517 | 0.012658 | 0.195907 |
| SIGLEC8         | 7.911583 | 0.019167 | NA       |
| CCK             | 7.911583 | 0.019167 | NA       |
| BLOC1S3         | 7.911583 | 0.019167 | NA       |
| RPL17P22        | 7.911583 | 0.019167 | NA       |
| MFSD6           | 7.901348 | 0.015454 | 0.206527 |
| NDUFAF8         | 7.897944 | 0.019379 | NA       |
| CPED1           | 7.888316 | 0.019501 | NA       |
| FAAP100         | 7.880011 | 0.019726 | NA       |
| CLEC18C         | 7.878724 | 0.018418 | 0.230103 |
| CEACAM22P       | 7.875767 | 0.000333 | 0.014982 |
| ZFAND2B         | 7.874849 | 0.002256 | 0.071323 |
| ENSG00000260404 | 7.871389 | 0.012697 | 0.195907 |
| ABC5            | 7.869188 | 0.019237 | 0.231606 |

|                 |          |          |          |
|-----------------|----------|----------|----------|
| TBC1D31         | 7.866154 | 0.018831 | 0.230103 |
| MAD2L1P1        | 7.863015 | 0.019927 | NA       |
| ZNF329          | 7.846859 | 0.001633 | 0.056365 |
| PHF14           | 7.84497  | 0.020254 | 0.236302 |
| HNRNPA1P22      | 7.839951 | 0.020293 | NA       |
| ERF             | 7.837736 | 0.020325 | NA       |
| HLA-B           | 7.834021 | 0.018699 | 0.230103 |
| GOLGA8R         | 7.831779 | 0.010581 | 0.183207 |
| HMGB1P39        | 7.829828 | 0.020457 | NA       |
| RELB            | 7.823544 | 0.020529 | NA       |
| ADH5            | 7.820302 | 0.008038 | 0.170506 |
| TRAV8-6         | 7.816598 | 0.020671 | NA       |
| C2CD2           | 7.816502 | 0.020638 | NA       |
| PRR27           | 7.814456 | 0.020706 | NA       |
| POLR3H          | 7.810306 | 0.020726 | NA       |
| HOOK3           | 7.810032 | 0.006843 | 0.157425 |
| AP5S1           | 7.805478 | 0.020176 | 0.236138 |
| ENDOV           | 7.803188 | 0.020891 | NA       |
| TMPRSS9         | 7.792917 | 0.021062 | NA       |
| BBS7            | 7.778993 | 0.021249 | NA       |
| CENPJ           | 7.776313 | 0.021342 | NA       |
| LILRA6          | 7.764766 | 0.021535 | NA       |
| AMT             | 7.759469 | 0.002949 | 0.086519 |
| ESRP2           | 7.74727  | 0.02211  | NA       |
| NOP14           | 7.744324 | 0.021844 | NA       |
| PDCD6IPP2       | 7.743906 | 0.02146  | 0.245684 |
| ACVRL1          | 7.742317 | 0.021663 | NA       |
| ENSG00000268434 | 7.739972 | 0.021958 | NA       |
| PGR             | 7.738019 | 0.021522 | 0.245824 |
| DIAPH3          | 7.736152 | 0.022001 | NA       |
| GNA12           | 7.727938 | 0.022067 | NA       |
| ZNF440          | 7.724855 | 0.011596 | 0.18908  |
| PHC1            | 7.719539 | 0.02238  | NA       |
| MARCHF9         | 7.707034 | 0.022655 | NA       |
| ZNF554          | 7.705888 | 0.000517 | 0.022036 |
| POLE3           | 7.698932 | 0.022563 | NA       |
| DNAH5           | 7.696993 | 0.022801 | 0.252768 |
| GASK1B          | 7.696018 | 0.023048 | NA       |
| ATXN1           | 7.691339 | 0.021782 | 0.247773 |
| BTBD7P1         | 7.655743 | 0.023448 | NA       |
| LRPAP1          | 7.643065 | 0.023672 | NA       |
| CCNYL1          | 7.640812 | 0.023745 | NA       |
| B3GALNT2        | 7.63678  | 0.017591 | 0.222732 |
| KMT5A           | 7.636762 | 0.023721 | NA       |

|                 |          |          |          |
|-----------------|----------|----------|----------|
| CASTOR1         | 7.635242 | 0.023823 | NA       |
| DUX4L32         | 7.635242 | 0.023823 | NA       |
| ATP8B2          | 7.624142 | 0.024082 | NA       |
| S100A10         | 7.618374 | 0.024138 | NA       |
| TJP1            | 7.614536 | 0.024103 | NA       |
| ACADSB          | 7.61222  | 0.02448  | NA       |
| SEMA4B          | 7.61082  | 0.023738 | 0.259629 |
| ZNF12           | 7.610186 | 0.024279 | NA       |
| ENSG00000258417 | 7.610051 | 0.024292 | NA       |
| LRRC61          | 7.608841 | 0.024313 | 0.262632 |
| PARD3B          | 7.608225 | 0.022635 | 0.251856 |
| HNF4A           | 7.607495 | 0.024339 | 0.262632 |
| GPR35           | 7.607495 | 0.024339 | 0.262632 |
| ENSG00000277983 | 7.607495 | 0.024339 | 0.262632 |
| RPF1            | 7.607495 | 0.024339 | NA       |
| PCGF6           | 7.607495 | 0.024339 | NA       |
| NLRP4           | 7.607495 | 0.024339 | NA       |
| EN2             | 7.607495 | 0.024339 | NA       |
| MSRB1P1         | 7.607495 | 0.024339 | NA       |
| PTMAP1          | 7.607495 | 0.024339 | NA       |
| RPS3AP8         | 7.607495 | 0.024339 | NA       |
| ENSG00000233820 | 7.607495 | 0.024339 | NA       |
| LONRF2P5        | 7.607495 | 0.024339 | NA       |
| YBX2            | 7.599032 | 0.024499 | NA       |
| DRG2            | 7.596216 | 0.024504 | NA       |
| RASGEF1B        | 7.571783 | 0.024045 | 0.262402 |
| MAT2B           | 7.569416 | 0.025204 | NA       |
| RWDD4           | 7.568604 | 0.025147 | NA       |
| CADPS2          | 7.567446 | 0.022667 | 0.251856 |
| BHLHE41         | 7.567338 | 0.025123 | NA       |
| TRIM27          | 7.556247 | 0.025692 | NA       |
| PMCHL2          | 7.553712 | 0.024514 | 0.263414 |
| SEMA6C          | 7.548847 | 0.024648 | 0.26428  |
| QPRT            | 7.542323 | 0.024893 | 0.264584 |
| IL31RA          | 7.542201 | 0.025553 | NA       |
| BAGE2           | 7.540834 | 0.02562  | NA       |
| LPCAT4          | 7.53484  | 0.025689 | NA       |
| AXIN2           | 7.514073 | 0.023373 | 0.257411 |
| GLCCI1          | 7.512508 | 0.02489  | 0.264584 |
| SCPEP1          | 7.50657  | 0.026208 | NA       |
| SELENBP1        | 7.504147 | 0.026307 | NA       |
| PFKFB4          | 7.498403 | 0.026409 | NA       |
| RXFP2           | 7.486563 | 0.026704 | NA       |
| MYO7A           | 7.486457 | 0.026665 | NA       |



|                 |          |          |          |
|-----------------|----------|----------|----------|
| BTN2A3P         | 7.481531 | 0.026716 | NA       |
| PTDSS1          | 7.476569 | 0.026885 | NA       |
| ENSG00000281759 | 7.475881 | 0.026923 | NA       |
| AIPL1           | 7.472181 | 0.008614 | 0.175197 |
| PMS2            | 7.471079 | 0.027001 | NA       |
| FRMD8           | 7.47009  | 0.027078 | NA       |
| ZNF583          | 7.466483 | 0.011285 | 0.188732 |
| DTNA            | 7.459625 | 0.027132 | NA       |
| PRR19           | 7.459121 | 0.000153 | 0.007339 |
| RARRES2P4       | 7.455452 | 0.027344 | NA       |
| ST13P5          | 7.453674 | 0.026862 | NA       |
| SMG1P6          | 7.45108  | 0.027435 | NA       |
| SNAI2           | 7.450177 | 0.027456 | NA       |
| COL19A1         | 7.449825 | 0.022027 | 0.24869  |
| HIC1            | 7.445563 | 0.027593 | NA       |
| PES1            | 7.444906 | 0.02765  | NA       |
| TXNL1           | 7.444047 | 0.027502 | NA       |
| MERTK           | 7.438673 | 0.02779  | NA       |
| TBCK            | 7.431152 | 0.027607 | NA       |
| ENSG00000233406 | 7.414881 | 0.021929 | NA       |
| PTTG3P          | 7.413151 | 0.028236 | NA       |
| NAGS            | 7.411982 | 0.027245 | 0.283437 |
| TIMM13          | 7.411121 | 0.027481 | 0.283885 |
| DOK1            | 7.410872 | 0.027417 | 0.283885 |
| BUD31           | 7.408109 | 0.014778 | 0.201705 |
| RER1            | 7.406318 | 0.011395 | 0.18878  |
| NUBP1           | 7.406206 | 0.026973 | 0.281245 |
| SRGAP3          | 7.403065 | 0.028439 | NA       |
| POU2F2          | 7.393979 | 0.02841  | NA       |
| CENPNP1         | 7.39165  | 0.028462 | NA       |
| C5orf22         | 7.387465 | 0.028998 | NA       |
| HYLS1           | 7.385477 | 0.028832 | NA       |
| RNF149          | 7.378613 | 0.028956 | NA       |
| DCHS2           | 7.376649 | 0.029025 | NA       |
| GRAMD4P3        | 7.374052 | 0.029081 | NA       |
| SCRN2           | 7.372417 | 0.029137 | NA       |
| MRPL2           | 7.370535 | 0.029189 | NA       |
| CSPG4P13        | 7.369652 | 0.029059 | NA       |
| NLGN1           | 7.368058 | 0.029053 | NA       |
| MRPL30          | 7.365546 | 0.0293   | NA       |
| KCND3           | 7.362502 | 0.029452 | NA       |
| GPR173          | 7.358982 | 0.029409 | NA       |
| SMIM29          | 7.35827  | 0.029428 | NA       |
| CMSS1           | 7.355985 | 0.011524 | NA       |

|                 |          |          |          |
|-----------------|----------|----------|----------|
| JPT2            | 7.352789 | 0.019224 | 0.231606 |
| ZBTB7A          | 7.351677 | 0.029576 | NA       |
| CD47            | 7.348926 | 0.028689 | 0.289511 |
| ANKRD29         | 7.348159 | 0.029447 | NA       |
| CCDC18          | 7.34569  | 0.029454 | NA       |
| RCN3            | 7.338882 | 0.029863 | NA       |
| APC2            | 7.331418 | 0.023435 | NA       |
| CSTB            | 7.33066  | 0.030048 | 0.295994 |
| ITFG2           | 7.328891 | 0.029932 | NA       |
| TSPOAP1         | 7.328457 | 0.030453 | NA       |
| TMUB1           | 7.327498 | 0.029426 | 0.292554 |
| HLA-A           | 7.327035 | 0.030121 | 0.295994 |
| SNX22           | 7.323352 | 0.010968 | 0.185491 |
| LUZP2           | 7.322137 | 0.030237 | 0.295994 |
| LTB4R2          | 7.322137 | 0.030237 | NA       |
| RPL21P134       | 7.322137 | 0.030237 | NA       |
| ENSG00000249495 | 7.322137 | 0.030237 | NA       |
| GARRE1          | 7.322137 | 0.030237 | NA       |
| FBXO5           | 7.322137 | 0.030237 | NA       |
| TRPM8           | 7.322137 | 0.030237 | NA       |
| MAP1A           | 7.322137 | 0.030237 | NA       |
| PHBP8           | 7.322137 | 0.030237 | NA       |
| BDP1P           | 7.322137 | 0.030237 | NA       |
| MIX23P3         | 7.322137 | 0.030237 | NA       |
| LGMNP1          | 7.322137 | 0.030237 | NA       |
| EEF1DP3         | 7.322137 | 0.030237 | NA       |
| RPL10P7         | 7.322137 | 0.030237 | NA       |
| STAT5A          | 7.31852  | 0.030446 | NA       |
| SNX18           | 7.318274 | 0.028103 | 0.28688  |
| ZSCAN20         | 7.314276 | 0.030409 | NA       |
| TRABD           | 7.312947 | 0.030444 | NA       |
| C1orf43         | 7.30709  | 0.030546 | NA       |
| GAMT            | 7.306898 | 0.030685 | NA       |
| NSMCE4A         | 7.305577 | 0.030714 | NA       |
| MROH6           | 7.303538 | 0.030661 | NA       |
| ERLIN2          | 7.302089 | 0.030757 | NA       |
| TNFRSF9         | 7.301806 | 0.030701 | NA       |
| HNRNPA1P52      | 7.300083 | 0.03074  | NA       |
| ZNF480          | 7.293681 | 0.030866 | NA       |
| TSPAN32         | 7.291897 | 0.030929 | NA       |
| HLA-F           | 7.291122 | 0.03093  | NA       |
| ZNF350          | 7.290941 | 0.030952 | 0.299146 |
| CELP            | 7.290927 | 0.015928 | 0.207577 |
| NAAA            | 7.289159 | 0.025337 | NA       |

|                 |          |          |          |
|-----------------|----------|----------|----------|
| NR5A2           | 7.284868 | 0.030432 | NA       |
| MAFF            | 7.281244 | 0.03086  | NA       |
| RPL7P21         | 7.280686 | 0.03119  | NA       |
| AKAP6           | 7.280449 | 0.020192 | 0.236138 |
| SAXO1           | 7.279935 | 0.031206 | NA       |
| GNL3LP1         | 7.277099 | 0.031273 | NA       |
| GAREM2          | 7.268795 | 0.031481 | NA       |
| SLC1A7          | 7.268699 | 0.031601 | NA       |
| ZNF684          | 7.266708 | 0.031516 | NA       |
| OCEL1           | 7.264506 | 0.03158  | NA       |
| TRIM44          | 7.262668 | 0.03161  | NA       |
| INTS14          | 7.259611 | 0.030531 | 0.2967   |
| GPR132          | 7.257648 | 0.031712 | NA       |
| HTT             | 7.251017 | 0.03183  | NA       |
| AMZ1            | 7.24696  | 0.031982 | NA       |
| UPK3BL1         | 7.243548 | 0.024047 | NA       |
| ZNF844          | 7.240564 | 0.032135 | NA       |
| AMBP            | 7.239646 | 0.032157 | NA       |
| LRRC74B         | 7.236509 | 0.014961 | 0.202004 |
| LITAFD          | 7.235933 | 0.028196 | NA       |
| HEXD            | 7.235837 | 0.032351 | NA       |
| TCF7L1          | 7.234468 | 0.03228  | NA       |
| GPSM2           | 7.230982 | 0.032408 | NA       |
| DHRS2           | 7.230582 | 0.008275 | 0.171876 |
| KBTBD8          | 7.228172 | 0.032432 | NA       |
| DHCR7           | 7.226014 | 0.032466 | NA       |
| ZNF317          | 7.216194 | 0.032716 | NA       |
| CBWD4P          | 7.208769 | 0.03253  | NA       |
| ENSG00000267640 | 7.208202 | 0.032915 | NA       |
| C1orf127        | 7.208044 | 0.032919 | NA       |
| CHCHD4          | 7.20679  | 0.03295  | NA       |
| ENSG00000218418 | 7.20529  | 0.032986 | NA       |
| ATL3            | 7.203066 | 0.032038 | 0.303987 |
| IL11            | 7.201067 | 0.033091 | NA       |
| ANO3            | 7.197398 | 0.033179 | NA       |
| EEF1A1P27       | 7.196853 | 0.033193 | NA       |
| PCDHGC3         | 7.195976 | 0.033308 | NA       |
| GABBR1          | 7.189012 | 0.033386 | NA       |
| ZNF510          | 7.184977 | 0.033485 | NA       |
| IGFLR1          | 7.18457  | 0.033522 | NA       |
| SEMA7A          | 7.180557 | 0.033595 | NA       |
| C19orf48        | 7.175598 | 0.033766 | NA       |
| DGKQ            | 7.172023 | 0.026784 | NA       |
| B4GALNT3        | 7.163384 | 0.03242  | 0.304907 |

|                 |          |          |          |
|-----------------|----------|----------|----------|
| ENSG00000260092 | 7.16237  | 0.034048 | NA       |
| MYO1G           | 7.15935  | 0.03307  | 0.307706 |
| FBXW9           | 7.159042 | 0.034133 | NA       |
| IL2RA           | 7.156965 | 0.032413 | 0.304907 |
| LZTFL1          | 7.153443 | 0.034378 | NA       |
| UTY             | 7.152792 | 0.02222  | 0.249723 |
| MIGA2           | 7.14992  | 0.027084 | NA       |
| BMPR1AP2        | 7.146992 | 0.034436 | NA       |
| CNTD1           | 7.145404 | 0.034476 | NA       |
| BTBD2           | 7.14378  | 0.034559 | NA       |
| BCL2L15         | 7.143734 | 0.034341 | NA       |
| PSMA7           | 7.142884 | 0.034611 | NA       |
| CCDC200         | 7.141371 | 0.033578 | 0.308918 |
| RPL24P4         | 7.139107 | 0.034636 | NA       |
| MOSPD2          | 7.138702 | 0.034706 | NA       |
| FGFR2           | 7.135515 | 0.0303   | NA       |
| SSR4            | 7.124979 | 0.034915 | NA       |
| YIPF2           | 7.124945 | 0.034998 | NA       |
| SLC5A6          | 7.116338 | 0.033028 | 0.307706 |
| ANTKMT          | 7.115089 | 0.035255 | NA       |
| B4GALT4         | 7.114445 | 0.033247 | 0.307961 |
| LRRC14          | 7.107857 | 0.035413 | NA       |
| SLC23A3         | 7.106253 | 0.035481 | 0.316885 |
| ENSG00000265798 | 7.102603 | 0.035575 | NA       |
| BCAS1           | 7.101624 | 0.034904 | NA       |
| XPC             | 7.099375 | 0.034272 | 0.312724 |
| MAP3K6          | 7.097733 | 0.035704 | NA       |
| COL11A2         | 7.095508 | 0.035761 | NA       |
| BZW2            | 7.092972 | 0.035858 | NA       |
| MTRES1          | 7.088895 | 0.035936 | NA       |
| SFT2D1          | 7.08657  | 0.012747 | 0.195907 |
| PPP1R15A        | 7.081589 | 0.036127 | NA       |
| COLGALT2        | 7.079947 | 0.036171 | NA       |
| LCMT1           | 7.078428 | 0.036193 | NA       |
| RTN2            | 7.077282 | 0.036219 | NA       |
| TBX3            | 7.072347 | 0.014605 | 0.201021 |
| CTSB            | 7.065293 | 0.03656  | NA       |
| ASB13           | 7.063071 | 0.036134 | NA       |
| ENSG00000203262 | 7.058457 | 0.036742 | 0.319112 |
| KANSL1          | 7.055315 | 0.016136 | 0.20972  |
| ENSG00000227948 | 7.051819 | 0.036922 | NA       |
| ARHGEF4         | 7.049744 | 0.037272 | 0.319112 |
| NADK            | 7.047072 | 0.037211 | NA       |
| RRAGC           | 7.046489 | 0.036831 | NA       |

|                 |          |          |          |
|-----------------|----------|----------|----------|
| NUDT4           | 7.045896 | 0.031387 | NA       |
| PKIG            | 7.04471  | 0.037056 | NA       |
| ZNF282          | 7.043185 | 0.037154 | NA       |
| IMP4            | 7.042176 | 0.03716  | NA       |
| HIRA            | 7.041443 | 0.03736  | NA       |
| CRABP2          | 7.041331 | 0.037264 | NA       |
| IL15            | 7.037836 | 0.025981 | 0.274371 |
| ENSG00000255639 | 7.037421 | 0.037309 | 0.319112 |
| ENSG00000213067 | 7.037421 | 0.037309 | 0.319112 |
| ENSG00000225869 | 7.037421 | 0.037309 | 0.319112 |
| MRPS33P3        | 7.037421 | 0.037309 | 0.319112 |
| KRT83           | 7.037421 | 0.037309 | 0.319112 |
| YWHAEP1         | 7.037421 | 0.037309 | NA       |
| EI24P4          | 7.037421 | 0.037309 | NA       |
| NPAP1P3         | 7.037421 | 0.037309 | NA       |
| NECTIN1         | 7.036698 | 0.03731  | NA       |
| RTEL1-TNFRSF6B  | 7.034874 | 0.037378 | NA       |
| ENSG00000271355 | 7.032922 | 0.037431 | NA       |
| CDIPT           | 7.032734 | 0.037394 | NA       |
| TMEM201         | 7.029186 | 0.037661 | NA       |
| ELOVL6          | 7.019275 | 0.037804 | NA       |
| NPHP3           | 7.017978 | 0.032151 | 0.303987 |
| PPP1R18         | 7.017216 | 0.037992 | NA       |
| CHPF2           | 7.016698 | 0.037875 | NA       |
| GPR137C         | 7.016007 | 0.037422 | NA       |
| MST1            | 7.015817 | 0.037934 | NA       |
| GZF1            | 7.0149   | 0.037923 | NA       |
| PPP2CA          | 7.012368 | 0.028519 | NA       |
| BMPR1AP1        | 7.009443 | 0.037658 | NA       |
| RPS21           | 7.007754 | 0.038123 | NA       |
| ENSG00000285476 | 7.006411 | 0.038159 | NA       |
| KRT17P1         | 7.005674 | 0.038179 | NA       |
| GFI1B           | 7.005674 | 0.038179 | NA       |
| FBLIM1P1        | 7.005674 | 0.038179 | NA       |
| TINCR           | 7.002573 | 0.014854 | 0.201743 |
| PDIA3P1         | 7.00006  | 0.038333 | NA       |
| RIN1            | 6.998683 | 0.03833  | NA       |
| DAAM2           | 6.995846 | 0.005415 | 0.136765 |
| ENSG00000283399 | 6.995487 | 0.038462 | NA       |
| SLIRP           | 6.995325 | 0.038784 | NA       |
| PMEPA1          | 6.994723 | 0.038781 | NA       |
| MDFI            | 6.993642 | 0.038533 | NA       |
| OGFOD2          | 6.993145 | 0.038539 | NA       |
| CKAP2L          | 6.989144 | 0.03883  | NA       |

|                 |          |          |          |
|-----------------|----------|----------|----------|
| HMMR            | 6.983951 | 0.038682 | NA       |
| DENND1A         | 6.983148 | 0.006381 | 0.148174 |
| ENSG00000224600 | 6.981917 | 0.038841 | NA       |
| C2CD5           | 6.981233 | 0.014308 | 0.200754 |
| TRPC6           | 6.978444 | 0.038939 | NA       |
| CYTH4           | 6.97707  | 0.039047 | NA       |
| RBAK            | 6.973675 | 0.039073 | NA       |
| ASL             | 6.970522 | 0.039043 | NA       |
| NUDT14          | 6.969072 | 0.039449 | NA       |
| CHERP           | 6.96874  | 0.028905 | 0.289639 |
| ZNF514          | 6.965111 | 0.037507 | 0.319112 |
| STAG3L2         | 6.963765 | 0.019107 | 0.231606 |
| GPR68           | 6.956111 | 0.039571 | NA       |
| EXOSC4          | 6.953625 | 0.039642 | NA       |
| INGX            | 6.952016 | 0.022517 | NA       |
| BAG6            | 6.944654 | 0.039909 | NA       |
| RBKS            | 6.936199 | 0.040143 | NA       |
| B3GNT4          | 6.934122 | 0.040192 | NA       |
| ENSG00000258134 | 6.932031 | 0.040263 | NA       |
| TMEM132B        | 6.93043  | 0.039135 | 0.327928 |
| FAR1            | 6.930023 | 0.038961 | 0.32746  |
| DEAF1           | 6.93001  | 0.040329 | NA       |
| HAT1            | 6.929287 | 0.016734 | NA       |
| ENSG00000260776 | 6.929222 | 0.040345 | NA       |
| NTNG1           | 6.927388 | 0.040529 | NA       |
| B3GAT1          | 6.92729  | 0.040397 | NA       |
| ENSG00000203546 | 6.926501 | 0.01342  | NA       |
| FYTTD1P1        | 6.924828 | 0.040472 | NA       |
| NCK2            | 6.922148 | 0.040256 | NA       |
| OIP5            | 6.921705 | 0.040563 | NA       |
| RXRB            | 6.921705 | 0.040563 | NA       |
| SAPCD2P3        | 6.921705 | 0.040563 | NA       |
| RPS15AP16       | 6.921705 | 0.040563 | NA       |
| DDX31           | 6.920613 | 0.040099 | NA       |
| NHSL2           | 6.920157 | 0.040692 | NA       |
| LRRFIP1P1       | 6.917371 | 0.040691 | NA       |
| SLC25A51P1      | 6.917054 | 0.040699 | NA       |
| KCTD1           | 6.916947 | 0.04084  | NA       |
| LRRC46          | 6.915601 | 0.040739 | NA       |
| EZH2            | 6.915538 | 0.040194 | NA       |
| WTAPP1          | 6.912653 | 0.040088 | NA       |
| POP1            | 6.91228  | 0.041166 | NA       |
| TCAF2P1         | 6.911256 | 0.040868 | NA       |
| NEK2            | 6.910047 | 0.022649 | 0.251856 |

|                 |          |          |          |
|-----------------|----------|----------|----------|
| EEF1E1          | 6.909297 | 0.040918 | NA       |
| MED13           | 6.907698 | 0.040937 | NA       |
| SHOX            | 6.905278 | 0.034059 | NA       |
| MED29           | 6.905216 | 0.041045 | NA       |
| TPTE2P1         | 6.903984 | 0.041082 | NA       |
| GPRC5C          | 6.902239 | 0.040631 | NA       |
| YJU2B           | 6.897498 | 0.041297 | NA       |
| KIAA1755        | 6.896674 | 0.041605 | NA       |
| CFAP44          | 6.894996 | 0.039647 | 0.330957 |
| GRK6P1          | 6.891558 | 0.041449 | NA       |
| PCDHA4          | 6.884914 | 0.008969 | 0.175197 |
| FOXK1           | 6.884223 | 0.041666 | NA       |
| MOCS1           | 6.882792 | 0.042006 | NA       |
| PIK3R2          | 6.881467 | 0.041742 | NA       |
| SOGA3           | 6.87615  | 0.041909 | NA       |
| MICALL2         | 6.874543 | 0.017076 | 0.217897 |
| ENSG00000260537 | 6.873235 | 0.042117 | NA       |
| TNRC18P2        | 6.873086 | 0.042001 | NA       |
| FLVCR1          | 6.872103 | 0.042223 | NA       |
| BRMS1           | 6.871645 | 0.042017 | NA       |
| NDST2           | 6.867127 | 0.04137  | NA       |
| PGAM1P7         | 6.859702 | 0.042404 | NA       |
| SLC9A6          | 6.859591 | 0.042332 | NA       |
| SDCCAG8         | 6.855645 | 0.042503 | NA       |
| ENSG00000248401 | 6.855071 | 0.042544 | NA       |
| NEIL1           | 6.85086  | 0.014476 | 0.200962 |
| SLC17A4         | 6.850416 | 0.042685 | NA       |
| FAM170A         | 6.850416 | 0.042685 | NA       |
| NEDD8-MDP1      | 6.849313 | 0.042719 | NA       |
| ENSG00000254595 | 6.849119 | 0.042725 | NA       |
| TBL2            | 6.84619  | 0.042814 | NA       |
| OR7A3P          | 6.843385 | 0.0429   | NA       |
| PTPN21          | 6.841337 | 0.042821 | NA       |
| BTNL9           | 6.841304 | 0.041292 | 0.33825  |
| ZSCAN4          | 6.840218 | 0.042997 | NA       |
| TAS2R20         | 6.839875 | 0.043006 | NA       |
| KCTD9P5         | 6.838659 | 0.042202 | NA       |
| MSH5            | 6.837418 | 0.02751  | 0.283885 |
| KLRC1           | 6.837266 | 0.043094 | NA       |
| IL11RA          | 6.835271 | 0.043441 | NA       |
| ITPRIPL2        | 6.834078 | 0.043186 | NA       |
| AIFM1           | 6.833459 | 0.043151 | NA       |
| DNAH8           | 6.831965 | 0.043264 | NA       |
| KLRG1           | 6.83162  | 0.043261 | NA       |

|                 |          |          |          |
|-----------------|----------|----------|----------|
| REEP5           | 6.831572 | 0.043364 | NA       |
| PPTC7           | 6.829786 | 0.043317 | NA       |
| CYP2E1          | 6.829148 | 0.043337 | NA       |
| ENSG00000237846 | 6.828599 | 0.041313 | 0.33825  |
| MICB            | 6.82837  | 0.043148 | 0.344343 |
| CIBAR1P2        | 6.82619  | 0.043428 | NA       |
| OLFM2           | 6.824263 | 0.043753 | NA       |
| MTM1            | 6.822807 | 0.043532 | NA       |
| UBE2L2          | 6.820782 | 0.043595 | NA       |
| RPS6P20         | 6.820555 | 0.001102 | 0.040394 |
| GEMIN4          | 6.818967 | 0.043652 | NA       |
| NDUFS3          | 6.815955 | 0.043876 | 0.346305 |
| SNAPC2          | 6.815391 | 0.043721 | NA       |
| ENSG00000265690 | 6.814672 | 0.043785 | NA       |
| ENSG00000270400 | 6.814672 | 0.043785 | NA       |
| MCU             | 6.812324 | 0.044026 | NA       |
| BCL2L12         | 6.810775 | 0.044156 | NA       |
| ZKSCAN5         | 6.808346 | 0.044037 | NA       |
| SNRNP48         | 6.80712  | 0.043649 | NA       |
| LRFN3           | 6.806048 | 0.044053 | NA       |
| FHIT            | 6.806    | 0.044055 | NA       |
| NME3            | 6.805701 | 0.044064 | NA       |
| NLRP6           | 6.804015 | 0.044117 | NA       |
| ERICH3          | 6.803007 | 0.044115 | NA       |
| TTC12           | 6.799082 | 0.044475 | NA       |
| DTWD1           | 6.796016 | 0.044503 | NA       |
| MXRA7P1         | 6.7951   | 0.0444   | NA       |
| SLC43A1         | 6.793831 | 0.044719 | NA       |
| SYNGR2          | 6.792885 | 0.044636 | NA       |
| KHDRBS3         | 6.792487 | 0.044479 | NA       |
| PPP2R3B         | 6.792449 | 0.04448  | NA       |
| TPMTP1          | 6.789986 | 0.044558 | NA       |
| TOB2            | 6.787478 | 0.044637 | NA       |
| PARD6A          | 6.787151 | 0.044647 | NA       |
| IKZF3           | 6.787151 | 0.044647 | NA       |
| SERPINA3        | 6.786398 | 0.044621 | NA       |
| INSIG2          | 6.784982 | 0.044721 | NA       |
| UBN2            | 6.784962 | 0.044716 | NA       |
| PIPSL           | 6.783209 | 0.039072 | NA       |
| UGCG            | 6.782838 | 0.042984 | 0.343749 |
| MRPL16          | 6.782819 | 0.04479  | NA       |
| GLRX3P2         | 6.781331 | 0.04483  | NA       |
| ENSG00000213605 | 6.779014 | 0.044904 | NA       |
| PIMREG          | 6.778927 | 0.044908 | NA       |



|                 |          |          |          |
|-----------------|----------|----------|----------|
| CCT6P3          | 6.777771 | 0.04496  | NA       |
| EBLN2           | 6.776726 | 0.044978 | NA       |
| RPL19P16        | 6.774825 | 0.045038 | NA       |
| IZUMO1          | 6.770927 | 0.045162 | NA       |
| EFCAB12         | 6.769063 | 0.045529 | NA       |
| ENSG00000254851 | 6.768152 | 0.045251 | NA       |
| RPL4P5          | 6.7668   | 0.045294 | NA       |
| ZNF85           | 6.76551  | 0.043767 | NA       |
| DUX4L18         | 6.764965 | 0.045351 | NA       |
| ADGRF3          | 6.763031 | 0.045415 | NA       |
| KMO             | 6.762948 | 0.045417 | NA       |
| ENSG00000229399 | 6.762948 | 0.045417 | NA       |
| ST6GALNAC5      | 6.762435 | 0.045433 | NA       |
| KLHL17          | 6.761838 | 0.045438 | NA       |
| MOSPD1          | 6.761502 | 0.044773 | NA       |
| DHX9            | 6.761319 | 0.040078 | 0.332287 |
| ITGBL1          | 6.759984 | 0.045488 | NA       |
| SEMA4G          | 6.759415 | 0.045618 | NA       |
| PGK1P1          | 6.758724 | 0.045552 | NA       |
| ARHGAP10        | 6.758336 | 0.045739 | NA       |
| FAM90A22P       | 6.758073 | 0.045573 | NA       |
| AMER2           | 6.757442 | 0.045594 | NA       |
| CDKN2D          | 6.756799 | 0.045614 | NA       |
| RAB27A          | 6.756635 | 0.045649 | NA       |
| POC1B-GALNT4    | 6.756243 | 0.045632 | NA       |
| FN3K            | 6.756    | 0.04564  | NA       |
| XPOTP1          | 6.755292 | 0.045663 | NA       |
| RPL6P24         | 6.755116 | 0.045668 | NA       |
| ENSG00000261457 | 6.754921 | 0.045675 | NA       |
| RPSAP47         | 6.754796 | 0.045679 | 0.349972 |
| ENSG00000232502 | 6.754796 | 0.045679 | 0.349972 |
| SPATS1          | 6.754796 | 0.045679 | 0.349972 |
| GOLGA6L6        | 6.754796 | 0.045679 | 0.349972 |
| COX6B2          | 6.754796 | 0.045679 | 0.349972 |
| RPL12P40        | 6.754796 | 0.045679 | NA       |
| MEIOC           | 6.754796 | 0.045679 | NA       |
| HEPACAM2        | 6.754796 | 0.045679 | NA       |
| RPS4XP7         | 6.754796 | 0.045679 | NA       |
| CLCA3P          | 6.754796 | 0.045679 | NA       |
| RPL12P42        | 6.754796 | 0.045679 | NA       |
| OR2J4P          | 6.754796 | 0.045679 | NA       |
| OR2J4P          | 6.754796 | 0.045679 | NA       |
| ENSG00000248824 | 6.754796 | 0.045679 | NA       |
| CTNNA1P1        | 6.754796 | 0.045679 | NA       |

|                 |          |          |          |
|-----------------|----------|----------|----------|
| DUX4L17         | 6.754796 | 0.045679 | NA       |
| ENSG00000280172 | 6.754796 | 0.045679 | NA       |
| ENSG00000280569 | 6.754796 | 0.045679 | NA       |
| SYT2            | 6.754796 | 0.045679 | NA       |
| SCD5            | 6.753228 | 0.044236 | NA       |
| ZDHHC12         | 6.751249 | 0.045792 | NA       |
| PROSER3         | 6.750962 | 0.023657 | 0.259629 |
| CPNE7           | 6.750425 | 0.045801 | NA       |
| ENSG00000267022 | 6.750003 | 0.045833 | NA       |
| SINHCAFP1       | 6.749997 | 0.045833 | NA       |
| POP7            | 6.748375 | 0.045887 | NA       |
| ENSG00000230026 | 6.747867 | 0.045902 | NA       |
| C3orf52         | 6.747733 | 0.045906 | NA       |
| C8orf82         | 6.747437 | 0.045991 | NA       |
| SMG9            | 6.746464 | 0.045992 | NA       |
| STKLD1          | 6.745768 | 0.04597  | NA       |
| NPM1P48         | 6.745768 | 0.04597  | NA       |
| ENSG00000274775 | 6.745768 | 0.04597  | NA       |
| OR5C1           | 6.745257 | 0.045986 | NA       |
| EFCAB7          | 6.745257 | 0.045986 | NA       |
| VWA7            | 6.745151 | 0.04598  | NA       |
| RLIMP1          | 6.742315 | 0.046082 | NA       |
| MORN3           | 6.739821 | 0.004406 | 0.117334 |
| MMP25           | 6.738985 | 0.046189 | NA       |
| SMC3            | 6.738985 | 0.046189 | NA       |
| ENSG00000205976 | 6.738985 | 0.046189 | NA       |
| NOL4L           | 6.738936 | 0.046728 | NA       |
| APBB3           | 6.735982 | 0.046207 | NA       |
| LINC00933       | 6.735827 | 0.046292 | NA       |
| GSTCD           | 6.735535 | 0.046545 | NA       |
| KRTAP1-1        | 6.732766 | 0.046391 | NA       |
| PDCL3           | 6.73271  | 0.04639  | NA       |
| CREBZF          | 6.731416 | 0.043425 | 0.345427 |
| CHKA            | 6.731336 | 0.032045 | 0.303987 |
| ZBTB22          | 6.730703 | 0.046458 | NA       |
| ERFE            | 6.730108 | 0.044559 | 0.349972 |
| ICMT            | 6.728987 | 0.046473 | NA       |
| RNF14P1         | 6.727716 | 0.046556 | NA       |
| SMURF1          | 6.727695 | 0.046557 | NA       |
| SLCO1A2         | 6.725411 | 0.033099 | 0.307706 |
| ENSG00000261717 | 6.722636 | 0.046722 | NA       |
| FRMD1           | 6.721663 | 0.04491  | NA       |
| PRSS55          | 6.721413 | 0.046953 | NA       |
| CLTB            | 6.720996 | 0.046785 | NA       |

|                 |          |          |    |
|-----------------|----------|----------|----|
| KLHDC2          | 6.719173 | 0.046714 | NA |
| ZNF441          | 6.717524 | 0.04689  | NA |
| METTL25         | 6.716338 | 0.046914 | NA |
| ZNF25           | 6.716181 | 0.046935 | NA |
| CENPF           | 6.714964 | 0.046975 | NA |
| LRATD1          | 6.714957 | 0.046975 | NA |
| DIRAS1          | 6.714957 | 0.046975 | NA |
| TNFAIP3         | 6.714318 | 0.046636 | NA |
| LIPG            | 6.71395  | 0.047211 | NA |
| ANKRD65         | 6.712381 | 0.04706  | NA |
| SERF1B          | 6.709901 | 0.039342 | NA |
| ALDH1B1         | 6.709797 | 0.047145 | NA |
| ANO7            | 6.709797 | 0.047145 | NA |
| PDIK1L          | 6.708773 | 0.047179 | NA |
| MRM3            | 6.708349 | 0.047189 | NA |
| FER             | 6.708215 | 0.047276 | NA |
| PAICSP1         | 6.707206 | 0.04723  | NA |
| BCAS2P1         | 6.707206 | 0.04723  | NA |
| SAT2            | 6.706414 | 0.047244 | NA |
| FGF22           | 6.704596 | 0.047317 | NA |
| MZB1            | 6.702177 | 0.047397 | NA |
| ENSG00000233990 | 6.702177 | 0.047397 | NA |
| ENSG00000251229 | 6.701997 | 0.047403 | NA |
| LMF1            | 6.699315 | 0.046011 | NA |
| CBR4            | 6.698974 | 0.047627 | NA |
| FAM193B         | 6.698698 | 0.046466 | NA |
| FCF1P7          | 6.698018 | 0.047535 | NA |
| TBC1D25         | 6.697677 | 0.047547 | NA |
| GLIPR1          | 6.696527 | 0.047585 | NA |
| GABPAP          | 6.694293 | 0.047659 | NA |
| ENSG00000220412 | 6.694123 | 0.047665 | NA |
| MYCBPAP         | 6.692825 | 0.048224 | NA |
| RPS2P45         | 6.690754 | 0.047777 | NA |
| FAF2            | 6.690259 | 0.047794 | NA |
| MSTO2P          | 6.689409 | 0.047822 | NA |
| KCNS2           | 6.689098 | 0.047832 | NA |
| TMC4            | 6.686173 | 0.04793  | NA |
| GXYLT2          | 6.685984 | 0.047937 | NA |
| GDI2P2          | 6.684534 | 0.047985 | NA |
| HYAL3           | 6.683506 | 0.04802  | NA |
| PLEKHG3         | 6.68311  | 0.047946 | NA |
| ENSG00000205485 | 6.682372 | 0.047055 | NA |
| BAALC           | 6.682028 | 0.048069 | NA |
| C2orf78         | 6.680861 | 0.048111 | NA |

|                 |          |          |          |
|-----------------|----------|----------|----------|
| GPAM            | 6.68083  | 0.048109 | NA       |
| CARMIL3         | 6.68083  | 0.048109 | NA       |
| SERPINH1P1      | 6.68083  | 0.048109 | NA       |
| ENSG00000239392 | 6.679553 | 0.048152 | NA       |
| PCSK2           | 6.678368 | 0.048191 | NA       |
| SLC50A1         | 6.678238 | 0.019213 | 0.231606 |
| EFCAB13         | 6.676677 | 0.048249 | NA       |
| CHORDC1P1       | 6.676565 | 0.048253 | NA       |
| RPL22P11        | 6.676565 | 0.048253 | NA       |
| ENSG00000283563 | 6.675632 | 0.048285 | NA       |
| ATP5PDP4        | 6.675422 | 0.048294 | NA       |
| POM121L7P       | 6.6753   | 0.048296 | NA       |
| ENSG00000278633 | 6.6753   | 0.048296 | NA       |
| CNTNAP3         | 6.674948 | 0.038621 | 0.325873 |
| ENSG00000219273 | 6.674223 | 0.048332 | NA       |
| CFL1P3          | 6.672749 | 0.048382 | NA       |
| RPL4P3          | 6.670038 | 0.048473 | NA       |
| KLC2            | 6.669267 | 0.046145 | 0.35013  |
| ENSG00000285329 | 6.667318 | 0.048565 | NA       |
| COX5BP6         | 6.667064 | 0.048574 | NA       |
| TYRO3P          | 6.66639  | 0.048597 | NA       |
| FUOM            | 6.665844 | 0.048719 | NA       |
| ZNF287          | 6.663455 | 0.048696 | NA       |
| FAM217B         | 6.662015 | 0.048745 | NA       |
| PSG6            | 6.66185  | 0.04875  | NA       |
| HAMP            | 6.661502 | 0.048762 | NA       |
| KCNQ4           | 6.660881 | 0.046717 | 0.351097 |
| C1orf122        | 6.659731 | 0.048824 | NA       |
| RAB4A           | 6.659581 | 0.039693 | NA       |
| B3GALT4         | 6.659466 | 0.048832 | NA       |
| B3GALT4         | 6.659466 | 0.048832 | NA       |
| EFNA5           | 6.658573 | 0.048938 | NA       |
| ARHGEF6         | 6.658317 | 0.048871 | NA       |
| ABHD16B         | 6.655643 | 0.048963 | NA       |
| AGAP3           | 6.655344 | 0.049041 | NA       |
| PAFAH1B1P2      | 6.653579 | 0.049032 | NA       |
| TCF19           | 6.651696 | 0.049085 | NA       |
| DOCK11P1        | 6.650804 | 0.049127 | NA       |
| HLA-DMB         | 6.649286 | 0.048922 | NA       |
| HDHD5           | 6.649049 | 0.03458  | 0.314368 |
| HMGXB4          | 6.648287 | 0.049086 | NA       |
| HSDL1           | 6.644896 | 0.049329 | NA       |
| SLC46A3         | 6.643185 | 0.049388 | NA       |
| CDSN            | 6.64242  | 0.049414 | NA       |

|                 |          |          |          |
|-----------------|----------|----------|----------|
| SH3GL1P3        | 6.64242  | 0.049414 | NA       |
| ADAMTSL5        | 6.641647 | 0.049363 | NA       |
| DMC1            | 6.639037 | 0.045692 | NA       |
| CNOT7           | 6.637424 | 0.049518 | NA       |
| RPL17P26        | 6.6361   | 0.04963  | NA       |
| RAPGEF3         | 6.635945 | 0.048703 | NA       |
| PLXNC1          | 6.635193 | 0.049739 | NA       |
| STX12           | 6.63452  | 0.049688 | NA       |
| BEAN1           | 6.633757 | 0.049713 | NA       |
| NIPSNAP1        | 6.632294 | 0.038335 | NA       |
| CCNY            | 6.631893 | 0.04978  | NA       |
| ZFP90           | 6.631619 | 0.049786 | NA       |
| ATPAF1          | 6.631406 | 0.049637 | NA       |
| WDR41           | 6.630558 | 0.049791 | NA       |
| SKIV2L          | 6.630168 | 0.049837 | NA       |
| HLA-V           | 6.629699 | 0.032622 | 0.305636 |
| TUBGCP5         | 6.628251 | 0.049903 | NA       |
| SKIV2L          | 6.627753 | 0.049923 | NA       |
| ADORA2A         | 6.626694 | 0.049798 | NA       |
| DEAF1           | 6.625388 | 0.050002 | NA       |
| PLEKHG4B        | 6.625213 | 0.044787 | NA       |
| ENSG00000242299 | 6.625125 | 0.04817  | 0.354939 |
| METTL25B        | 6.623978 | 0.049924 | NA       |
| EMG1            | 6.623753 | 0.049478 | NA       |
| HES6            | 6.622514 | 0.050102 | NA       |
| HCFC2           | 6.621254 | 0.049997 | NA       |
| COX7C           | 6.614118 | 0.04307  | NA       |
| ADAM32          | 6.610766 | 0.019552 | 0.233665 |
| DIPK2B          | 6.594908 | 0.049785 | NA       |
| MLKL            | 6.581308 | 0.034948 | 0.315366 |
| LAPTM4B         | 6.581095 | 0.015037 | 0.202415 |
| FAM133B         | 6.570703 | 0.035504 | 0.316885 |
| COG4            | 6.570632 | 0.045134 | 0.349972 |
| SPATA21         | 6.542416 | 0.043702 | NA       |
| ESPL1           | 6.538013 | 0.0379   | NA       |
| LINC01347       | 6.51775  | 0.020856 | 0.24159  |
| NOCT            | 6.494241 | 0.008313 | 0.171876 |
| CWC25           | 6.489171 | 0.007957 | 0.170506 |
| CCDC120         | 6.479959 | 0.037467 | 0.319112 |
| ZNF513          | 6.476556 | 0.049284 | 0.360971 |
| ZNF273          | 6.468602 | 0.001973 | 0.064019 |
| KCNJ15          | 6.456679 | 0.0162   | 0.209999 |
| LAMP2           | 6.453023 | 0.012592 | 0.195907 |
| MAGIX           | 6.434512 | 0.03488  | NA       |

|                 |          |          |          |
|-----------------|----------|----------|----------|
| ENSG00000270518 | 6.429393 | 0.039764 | 0.33137  |
| PPP3R1          | 6.374317 | 0.013957 | 0.19951  |
| TMEM130         | 6.373646 | 0.041206 | 0.33825  |
| ENSG00000255330 | 6.362014 | 0.035112 | NA       |
| ZCCHC4          | 6.353355 | 0.048749 | NA       |
| KCP             | 6.336436 | 0.011476 | 0.18878  |
| ZC3H7B          | 6.316859 | 0.019365 | 0.232565 |
| TNRC6C          | 6.308952 | 0.033949 | 0.310939 |
| C12orf50        | 6.306779 | 0.008119 | 0.17087  |
| ENSG00000217120 | 6.30293  | 0.008368 | 0.172285 |
| CCDC158         | 6.29848  | 0.01294  | 0.19702  |
| ANKRD36BP2      | 6.285863 | 0.034802 | 0.31489  |
| TMEM266         | 6.26124  | 0.00929  | 0.175197 |
| MRS2            | 6.259708 | 0.001244 | 0.044504 |
| MARK2           | 6.257656 | 0.046968 | 0.351899 |
| UEVLD           | 6.219918 | 0.047609 | 0.353463 |
| HRK             | 6.170516 | 0.042449 | 0.342106 |
| ARID4A          | 6.144978 | 0.031596 | 0.302383 |
| ANXA3           | 6.124238 | 0.045491 | 0.349972 |
| C12orf4         | 6.120561 | 0.021148 | 0.243826 |
| ECD             | 6.109706 | 0.031571 | 0.302383 |
| AKAP1           | 6.076349 | 0.036025 | 0.319112 |
| FCRL2           | 6.073035 | 0.035446 | 0.316885 |
| ACBD4           | 6.066247 | 0.018097 | 0.227369 |
| QRSL1           | 6.062203 | 0.029449 | 0.292554 |
| CNTNAP1         | 6.060917 | 0.046697 | 0.351097 |
| ZNF286A         | 6.057236 | 0.044292 | NA       |
| ARL2            | 6.05047  | 0.002938 | 0.086519 |
| UBOX5           | 5.994502 | 0.030191 | 0.295994 |
| GRM6            | 5.993258 | 0.022206 | 0.249723 |
| MROH7           | 5.978249 | 0.00169  | 0.0579   |
| PKD1L2          | 5.971108 | 0.011864 | 0.189218 |
| KLC3            | 5.970267 | 0.028532 | 0.288856 |
| VPS52           | 5.940762 | 0.046315 | NA       |
| RNF207          | 5.939115 | 0.034206 | 0.312708 |
| COMMD4          | 5.934881 | 0.015845 | 0.207072 |
| C9orf85         | 5.934176 | 0.031922 | NA       |
| STAG3L3         | 5.906239 | 0.029012 | 0.290122 |
| AKAP9           | 5.896981 | 0.02779  | 0.284896 |
| EDRF1           | 5.886038 | 0.019934 | 0.234804 |
| OTUB1           | 5.881317 | 0.023264 | 0.257319 |
| SMG1P7          | 5.856812 | 0.013177 | NA       |
| EMC4            | 5.846921 | 0.00901  | 0.175197 |
| RPTOR           | 5.804327 | 0.036645 | 0.319112 |

|                 |          |          |          |
|-----------------|----------|----------|----------|
| UGGT2           | 5.793939 | 0.017674 | NA       |
| IL10            | 5.762829 | 0.028774 | 0.289511 |
| TMEM182         | 5.750263 | 0.008287 | 0.171876 |
| ZDHHC8          | 5.749939 | 0.04371  | NA       |
| TRANK1          | 5.737498 | 0.033605 | 0.308918 |
| RDH13           | 5.733148 | 0.030444 | 0.2967   |
| DDX27           | 5.724672 | 0.002666 | 0.083195 |
| DCUN1D2         | 5.721004 | 0.000565 | 0.023647 |
| HACD2           | 5.695773 | 0.031932 | 0.303987 |
| RBM17           | 5.68431  | 0.044743 | 0.349972 |
| ETF1P2          | 5.666872 | 0.046609 | 0.351097 |
| GBP5            | 5.650952 | 0.038195 | NA       |
| SLC35E1         | 5.645815 | 0.023377 | 0.257411 |
| EIF4E2          | 5.632991 | 0.027519 | 0.283885 |
| LINC02210       | 5.62796  | 0.047267 | NA       |
| CUL4A           | 5.615505 | 0.047531 | 0.353463 |
| ACVR2B          | 5.61498  | 0.024875 | 0.264584 |
| VPS11           | 5.611004 | 0.048828 | 0.358708 |
| MECOM           | 5.597782 | 0.00574  | 0.142045 |
| NAV3            | 5.563866 | 0.001542 | 0.054355 |
| NUCB2           | 5.55886  | 0.047423 | NA       |
| FAM98C          | 5.548663 | 0.007035 | 0.158153 |
| GPALPP1         | 5.529947 | 0.046177 | 0.35013  |
| ERBB2           | 5.521294 | 0.016886 | 0.216305 |
| MAST1           | 5.516402 | 0.033666 | 0.308918 |
| MZT2A           | 5.510935 | 0.03336  | 0.308194 |
| LRRD1           | 5.491281 | 0.047266 | 0.353053 |
| LUC7L3          | 5.480248 | 0.044872 | 0.349972 |
| AMDHD1          | 5.479612 | 0.01902  | 0.231256 |
| NOPCHAP1        | 5.44879  | 0.031524 | 0.302383 |
| PRRG3           | 5.447182 | 0.026238 | NA       |
| VWA5B1          | 5.421713 | 0.037882 | 0.321699 |
| SEC14L1         | 5.42053  | 0.049795 | 0.364175 |
| MINDY2          | 5.411908 | 0.043004 | 0.343749 |
| BBS5            | 5.41148  | 0.029301 | 0.292418 |
| IFT81           | 5.403183 | 0.038362 | 0.324655 |
| MCFD2           | 5.358529 | 0.013098 | 0.19702  |
| ENSG00000283384 | 5.346971 | 0.026719 | 0.280955 |
| TAOK2           | 5.343829 | 0.04331  | 0.345074 |
| CHCHD5          | 5.322163 | 0.041567 | 0.33825  |
| HLA-DQA1        | 5.308903 | 0.002135 | 0.06884  |
| ZMAT3           | 5.308295 | 0.030578 | 0.2967   |
| HLA-V           | 5.27329  | 8.23E-05 | 0.004199 |
| PLAAT3          | 5.236782 | 0.030264 | 0.295994 |

|                 |          |          |          |
|-----------------|----------|----------|----------|
| ADPGK           | 5.213476 | 0.032102 | 0.303987 |
| GOT2            | 5.202143 | 0.041714 | 0.33825  |
| ENSG00000229180 | 5.187778 | 0.04002  | 0.332287 |
| RBM47           | 5.139247 | 0.024322 | 0.262632 |
| G3BP2           | 5.13353  | 0.025532 | 0.270791 |
| BORCS8          | 5.106819 | 0.041277 | 0.33825  |
| METTL14         | 5.091947 | 0.048095 | 0.354939 |
| COL28A1         | 5.071748 | 0.023925 | NA       |
| TOP3A           | 5.066953 | 0.04793  | 0.354772 |
| HLA-A           | 5.061369 | 0.044793 | 0.349972 |
| CDKL5           | 5.037718 | 0.035647 | 0.317579 |
| ZKSCAN1         | 5.029733 | 0.028867 | 0.289639 |
| GPATCH1         | 5.014273 | 0.038137 | NA       |
| DUOX1           | 4.990631 | 0.036523 | 0.319112 |
| NUB1            | 4.985747 | 0.043931 | NA       |
| GABRG2          | 4.985355 | 0.001601 | 0.055635 |
| ATXN3           | 4.922354 | 0.046816 | 0.351298 |
| ZNF200          | 4.913822 | 0.045012 | NA       |
| KANK1           | 4.862336 | 0.032198 | 0.303987 |
| MGST3           | 4.823912 | 0.047087 | NA       |
| TMEM106B        | 4.821949 | 0.044707 | NA       |
| CEP43           | 4.800881 | 0.026977 | 0.281245 |
| TSSC2           | 4.792753 | 0.036853 | NA       |
| TBXA2R          | 4.763989 | 0.032174 | 0.303987 |
| CYB5RL          | 4.712482 | 0.024802 | 0.264584 |
| ATP5MC2         | 4.709559 | 0.028199 | 0.286892 |
| ABHD18          | 4.705499 | 0.039361 | NA       |
| IRS3P           | 4.705292 | 0.044927 | 0.349972 |
| HLA-F           | 4.698466 | 0.026946 | 0.281245 |
| DPP9            | 4.663249 | 0.018772 | 0.230103 |
| KBTBD12         | 4.660446 | 0.007036 | 0.158153 |
| ENSG00000188897 | 4.653995 | 0.030674 | 0.297039 |
| CRX             | 4.648538 | 0.01965  | 0.233738 |
| PDE6A           | 4.490844 | 0.018971 | 0.231244 |
| MNT             | 4.473008 | 0.012073 | 0.190828 |
| TPGS1           | 4.461623 | 0.041763 | 0.33825  |
| RUNDC3A         | 4.458015 | 0.034831 | 0.31489  |
| E2F3P2          | 4.437976 | 0.009273 | 0.175197 |
| FAM228B         | 4.416144 | 0.041508 | 0.33825  |
| MRNIP           | 4.384345 | 0.014965 | 0.202004 |
| REL             | 4.362625 | 0.011124 | 0.18731  |
| TGFBRAP1        | 4.360829 | 0.022292 | 0.249954 |
| ZNF724          | 4.340182 | 0.045702 | 0.349972 |
| CAMKK1          | 4.306746 | 0.040965 | 0.33825  |



|                 |          |          |          |
|-----------------|----------|----------|----------|
| RBFA            | 4.264978 | 0.042053 | 0.339469 |
| HLA-V           | 4.23255  | 0.036557 | 0.319112 |
| ACTE1P          | 4.23155  | 0.028736 | 0.289511 |
| GOSR1           | 4.15962  | 0.021981 | 0.24869  |
| RASEF           | 4.114291 | 0.024387 | 0.262632 |
| NEDD4           | 4.073041 | 0.01088  | 0.185106 |
| CYP3A5          | 3.97124  | 0.047907 | 0.354772 |
| POLR2J3         | 3.890211 | 0.03733  | 0.319112 |
| EXD1            | 3.816708 | 0.039896 | 0.331899 |
| HLA-F           | 3.768677 | 0.046398 | 0.350848 |
| CFLAR           | 3.758253 | 0.036988 | 0.319112 |
| GTDC1           | 3.736401 | 0.035356 | 0.316885 |
| ZNF850          | 3.727195 | 0.045637 | 0.349972 |
| ATP7B           | 3.626247 | 0.006001 | 0.146102 |
| PLEKHH1         | 3.530615 | 0.048147 | 0.354939 |
| MT-ND2          | 3.472961 | 0.036808 | 0.319112 |
| TBC1D8B         | 3.46032  | 0.01752  | 0.222409 |
| RICTOR          | 3.39002  | 0.037424 | 0.319112 |
| SIAE            | 3.356105 | 0.026844 | 0.281245 |
| BLOC1S6         | 3.326941 | 0.013091 | 0.19702  |
| METTL21A        | 3.294999 | 0.036486 | 0.319112 |
| CCL5            | 3.272568 | 0.035981 | 0.319112 |
| TMEM45A         | 3.066914 | 0.041705 | 0.33825  |
| PGF             | 3.036034 | 0.045847 | 0.349972 |
| NEK7            | -30      | 1.33E-25 | 6.53E-22 |
| ENSG00000283738 | -30      | 1.77E-19 | 6.68E-17 |
| DYNC2H1         | -29.6974 | 1.17E-21 | 1.15E-18 |
| BUB1            | -29.6745 | 7.42E-21 | 4.04E-18 |
| DKC1            | -29.4752 | 3.89E-21 | 2.38E-18 |
| CALM2P2         | -29.4057 | 3.55E-21 | 2.38E-18 |
| ACTA1           | -29.3009 | 1.19E-18 | 3.23E-16 |
| LRRC37A2        | -29.2653 | 8.79E-22 | 1.08E-18 |
| PLXNA1          | -29.1854 | 3.80E-25 | 9.31E-22 |
| PDE4B           | -28.8628 | 3.81E-18 | 9.83E-16 |
| XPA             | -28.8202 | 4.27E-18 | 1.05E-15 |
| GUSBP9          | -28.5968 | 1.35E-23 | 2.20E-20 |
| NPHP1           | -28.545  | 7.47E-20 | 3.05E-17 |
| FEM1B           | -28.5165 | 9.49E-18 | 2.21E-15 |
| ABI1            | -28.2541 | 1.88E-17 | 4.20E-15 |
| RRAS2P1         | -28.1808 | 2.28E-17 | 4.85E-15 |
| PIK3AP1         | -28.1556 | 1.70E-20 | 8.34E-18 |
| ANKRD36         | -28.0459 | 2.93E-20 | 1.30E-17 |
| FOLR2           | -28.0359 | 3.31E-17 | 6.46E-15 |
| COMMD7          | -28.0224 | 3.43E-17 | 6.46E-15 |

|                 |          |          |          |
|-----------------|----------|----------|----------|
| LLPH            | -27.9228 | 4.43E-17 | 7.74E-15 |
| WDR27           | -27.9141 | 3.15E-19 | 1.03E-16 |
| NPTN            | -27.878  | 4.97E-17 | 8.39E-15 |
| AKR1C2          | -27.8259 | 5.67E-17 | 9.23E-15 |
| PHC1P1          | -27.8146 | 5.84E-17 | 9.23E-15 |
| NCKAP5          | -27.7567 | 6.77E-17 | 1.04E-14 |
| TNXB            | -27.7042 | 7.73E-17 | 1.15E-14 |
| VSIG4           | -27.6756 | 8.32E-17 | 1.20E-14 |
| LSG1            | -27.5902 | 1.03E-16 | 1.44E-14 |
| SHLD2P3         | -27.4834 | 3.90E-19 | 1.19E-16 |
| ARMCX5          | -27.4593 | 2.64E-19 | 9.25E-17 |
| L3MBTL3         | -27.3779 | 2.12E-21 | 1.73E-18 |
| KATNIP          | -27.2913 | 1.53E-16 | 2.08E-14 |
| PRKCD           | -27.2769 | 2.28E-16 | 3.02E-14 |
| STX8P1          | -27.0896 | 3.64E-16 | 4.35E-14 |
| ENSG00000243554 | -27.0513 | 4.01E-16 | 4.67E-14 |
| PKD1P3          | -26.9755 | 4.84E-16 | 5.40E-14 |
| IGKV3D-20       | -26.9743 | 4.85E-16 | 5.40E-14 |
| KDM8            | -26.945  | 5.22E-16 | 5.68E-14 |
| MTG1            | -26.8871 | 6.00E-16 | 6.39E-14 |
| WASHC2C         | -26.859  | 2.77E-16 | 3.57E-14 |
| COMMD2          | -26.662  | 9.14E-16 | 9.53E-14 |
| TRPV4           | -26.6602 | 1.05E-15 | 1.08E-13 |
| DNAH17          | -26.6245 | 1.15E-15 | 1.15E-13 |
| CHCHD6          | -26.5702 | 1.31E-15 | 1.29E-13 |
| ENSG00000232702 | -26.5298 | 1.45E-15 | 1.37E-13 |
| TMEM87B         | -26.5291 | 1.45E-15 | 1.37E-13 |
| POFUT1          | -26.3712 | 2.14E-15 | 1.97E-13 |
| TNXA            | -26.3286 | 2.37E-15 | 2.15E-13 |
| MT1G            | -26.1125 | 4.00E-15 | 3.50E-13 |
| UBE2SP2         | -26.0736 | 4.39E-15 | 3.71E-13 |
| ANKRD20A5P      | -25.9804 | 5.49E-15 | 4.56E-13 |
| RAD21           | -25.5314 | 1.60E-14 | 1.26E-12 |
| ENSG00000282444 | -25.0788 | 4.63E-14 | 3.38E-12 |
| CLEC2B          | -25.0253 | 5.23E-14 | 3.77E-12 |
| SEC23IP         | -13.1215 | 7.77E-05 | 0.00401  |
| TNNT3           | -12.6847 | 4.47E-05 | 0.002357 |
| UBE2V1          | -12.1759 | 0.000133 | 0.006562 |
| NPIPA1          | -12.0681 | 9.16E-05 | 0.004626 |
| CFAP69          | -11.8679 | 0.000144 | 0.006997 |
| FAS             | -11.5993 | 6.05E-05 | 0.003152 |
| EP400P1         | -11.3572 | 0.000628 | 0.02585  |
| FRMD4A          | -11.1047 | 0.000337 | 0.014999 |
| CABYR           | -10.5483 | 0.000849 | 0.032492 |

|          |          |          |          |
|----------|----------|----------|----------|
| BOP1     | -10.3435 | 0.001849 | 0.061629 |
| ROBO3    | -10.2099 | 0.001164 | 0.041954 |
| IGKV1-16 | -10.1653 | 0.001105 | 0.040394 |
| WASH2P   | -10.1566 | 0.001877 | 0.062148 |
| ZNF776   | -9.97382 | 0.00241  | 0.075707 |
| BTN3A2   | -9.96991 | 0.000958 | 0.035836 |
| RHD      | -9.90826 | 0.002858 | 0.086508 |
| GIGYF2   | -9.56281 | 0.000266 | 0.012534 |
| EIF2B5   | -9.47191 | 0.00286  | 0.086508 |
| EXT1     | -9.39462 | 0.002919 | 0.086519 |
| TBC1D15  | -9.25291 | 0.000739 | 0.029687 |
| BPNT1    | -9.13243 | 0.000801 | 0.030902 |
| GNPNAT1  | -9.09881 | 0.003014 | 0.087899 |
| CUTC     | -9.07527 | 0.004252 | 0.114999 |
| PUM2     | -9.05    | 0.00536  | 0.136209 |
| HSP90AA1 | -8.93166 | 0.000127 | 0.006345 |
| ARL17B   | -8.92203 | 0.004384 | 0.117334 |
| IWS1     | -8.85648 | 0.00634  | 0.148174 |
| PRELID2  | -8.83874 | 0.000314 | 0.014364 |
| NPIPB13  | -8.60568 | 0.000729 | 0.029515 |
| OXCT1    | -8.51266 | 0.010175 | 0.181497 |
| ROBO1    | -8.43272 | 0.0005   | 0.021479 |
| KIF14    | -8.38603 | 0.00492  | 0.126881 |
| LPAL2    | -8.37124 | 0.010223 | 0.181497 |
| INTS13   | -8.16075 | 0.011399 | 0.18878  |
| RPL7P9   | -8.14214 | 0.006895 | 0.1575   |
| PSMB9    | -8.06875 | 0.014863 | 0.201743 |
| PRSS23   | -8.04653 | 0.000761 | 0.030075 |
| GPX8     | -7.86957 | 0.010275 | 0.181757 |
| ENAH     | -7.63136 | 0.000314 | 0.014364 |
| TP53I11  | -7.51981 | 0.007706 | 0.168101 |
| SOD1     | -7.50105 | 0.015637 | 0.206527 |
| UAP1     | -7.44744 | 0.002256 | 0.071323 |
| KLC1     | -7.35095 | 0.000269 | 0.012545 |
| DCAF13   | -7.34343 | 0.003565 | 0.10098  |
| CPS1     | -7.31632 | 0.010391 | 0.183151 |
| RPL5     | -7.301   | 0.018803 | 0.230103 |
| FAP      | -7.26769 | 0.009356 | 0.175657 |
| CR1      | -7.1815  | 0.009465 | 0.176308 |
| CBWD5    | -7.17685 | 0.000888 | 0.033717 |
| DDX3Y    | -7.17514 | 0.021426 | 0.245684 |
| PIK3C3   | -7.15926 | 0.010204 | 0.181497 |
| SMAD5    | -7.1093  | 0.004271 | 0.114999 |
| BUB1B    | -6.9884  | 0.007695 | 0.168101 |

|          |          |          |          |
|----------|----------|----------|----------|
| EDEM1    | -6.98158 | 0.033105 | 0.307706 |
| CHPT1    | -6.90933 | 0.037247 | 0.319112 |
| USF2     | -6.88582 | 0.025723 | 0.27223  |
| MYO5B    | -6.8835  | 0.021346 | 0.245524 |
| MAPK9    | -6.86547 | 0.008775 | 0.175197 |
| PXDN     | -6.8565  | 0.005935 | 0.145408 |
| TP53     | -6.78988 | 0.010579 | 0.183207 |
| ABI3BP   | -6.73527 | 0.011691 | 0.18908  |
| CDH13    | -6.70551 | 0.014047 | 0.19951  |
| ITGA11   | -6.6806  | 0.028287 | 0.286967 |
| ZC3H6    | -6.65853 | 0.009867 | 0.179726 |
| PRKACB   | -6.58567 | 0.018597 | 0.230103 |
| SMIM4    | -6.54913 | 0.045967 | 0.35013  |
| DOCK11   | -6.44679 | 0.036155 | 0.319112 |
| ERO1A    | -6.39498 | 0.0089   | 0.175197 |
| C4B      | -6.35773 | 0.038214 | 0.323962 |
| ACOX1    | -6.35062 | 0.016907 | 0.216305 |
| IDE      | -6.31702 | 0.019693 | 0.233738 |
| PSAP     | -6.31359 | 0.004145 | 0.114761 |
| RNF2     | -6.28554 | 0.019529 | 0.233665 |
| ARHGEF28 | -6.26624 | 0.045039 | 0.349972 |
| USP14    | -6.2322  | 0.026192 | 0.275999 |
| EIF5B    | -6.19799 | 0.021015 | 0.242858 |
| ADAMTS6  | -6.18616 | 0.019903 | 0.234804 |
| CLEC7A   | -6.17365 | 0.000955 | 0.035836 |
| AVIL     | -6.15561 | 0.01977  | 0.233996 |
| TIMP1    | -6.10794 | 0.011556 | 0.18908  |
| TOP2A    | -6.10663 | 0.046231 | 0.35013  |
| EEF1A1P6 | -6.10557 | 0.043889 | 0.346305 |
| TANGO6   | -6.07709 | 0.036354 | 0.319112 |
| QARS1    | -6.03162 | 0.004842 | 0.126038 |
| IRF9     | -6.02853 | 0.041433 | 0.33825  |
| NOMO1    | -6.02653 | 0.020571 | 0.238854 |
| EIF2A    | -6.00106 | 0.028221 | 0.286892 |
| NPM1     | -5.96455 | 0.005858 | 0.144244 |
| SLC39A10 | -5.95524 | 0.029494 | 0.292554 |
| PTGES3   | -5.93979 | 0.022598 | 0.251856 |
| HNRNPK   | -5.91695 | 0.001356 | 0.048131 |
| CD163    | -5.91107 | 0.033398 | 0.308194 |
| RELA     | -5.78948 | 0.043599 | 0.345692 |
| EPS15    | -5.74042 | 0.036707 | 0.319112 |
| DROSHA   | -5.71771 | 0.014555 | 0.200962 |
| ARHGDIB  | -5.71094 | 0.042776 | 0.343592 |
| NBPF8    | -5.67251 | 0.009655 | 0.177858 |

|                 |          |          |          |
|-----------------|----------|----------|----------|
| POLR2B          | -5.66607 | 0.004658 | 0.122056 |
| NDUFV3          | -5.65127 | 0.013549 | 0.19951  |
| MIDEAS          | -5.63795 | 0.015637 | 0.206527 |
| NADK2           | -5.63261 | 0.030464 | 0.2967   |
| QRICH1          | -5.6272  | 0.034485 | 0.314083 |
| HNRNPDL         | -5.59186 | 0.035264 | 0.316885 |
| TUFM            | -5.56766 | 0.01877  | 0.230103 |
| NFX1            | -5.5051  | 0.020146 | 0.236138 |
| NRP1            | -5.50132 | 0.006226 | 0.148174 |
| NBN             | -5.49487 | 0.019701 | 0.233738 |
| BDP1            | -5.4158  | 0.029605 | 0.293055 |
| MAT2A           | -5.40769 | 0.02794  | 0.285817 |
| PGD             | -5.3607  | 0.044262 | 0.348686 |
| AZIN1           | -5.3274  | 0.015488 | 0.206527 |
| GNL2            | -5.30868 | 0.013252 | 0.198581 |
| CLU             | -5.30336 | 0.029896 | 0.295347 |
| TTC14           | -5.2993  | 0.021794 | 0.247773 |
| TNFRSF1B        | -5.29845 | 0.035409 | 0.316885 |
| DDX46           | -5.28152 | 0.023699 | 0.259629 |
| ARAP1           | -5.28106 | 0.036188 | 0.319112 |
| TM9SF3          | -5.19545 | 0.037512 | 0.319112 |
| NDUFA10         | -5.19508 | 0.013103 | 0.19702  |
| CRYAB           | -5.17109 | 0.045735 | 0.349972 |
| PARVA           | -5.14381 | 0.033157 | 0.307706 |
| RGPD5           | -5.13548 | 0.03123  | 0.301234 |
| ESYT1           | -5.07989 | 0.027638 | 0.28451  |
| RBM28           | -5.06696 | 0.010515 | 0.183207 |
| ECT2            | -4.99663 | 0.010506 | 0.183207 |
| USP34           | -4.98439 | 0.041693 | 0.33825  |
| ABCE1           | -4.97498 | 0.015589 | 0.206527 |
| PLS3            | -4.96685 | 0.04488  | 0.349972 |
| DYNLL1          | -4.93838 | 0.048471 | 0.356618 |
| PRUNE2          | -4.93153 | 0.042634 | 0.343032 |
| ELP2            | -4.91324 | 0.049237 | 0.360971 |
| CEP76           | -4.89955 | 0.041888 | 0.338695 |
| EIF2AK4         | -4.88422 | 0.020443 | 0.237937 |
| RAD50           | -4.87777 | 0.04138  | 0.33825  |
| RBBP6           | -4.85283 | 0.038825 | 0.326878 |
| NAPG            | -4.84444 | 0.050014 | 0.364686 |
| TXNDC15         | -4.82837 | 0.038639 | 0.325873 |
| ENSG00000273807 | -4.74557 | 0.042844 | 0.343592 |
| SAR1A           | -4.73465 | 0.017222 | 0.219191 |
| CKAP5           | -4.67258 | 0.046148 | 0.35013  |
| ULK2            | -4.63347 | 0.046619 | 0.351097 |

|          |          |          |          |
|----------|----------|----------|----------|
| SIPA1    | -4.57044 | 0.045602 | 0.349972 |
| P4HA1    | -4.50047 | 0.03259  | 0.305636 |
| TIMM50   | -4.48389 | 0.031538 | 0.302383 |
| CCZ1B    | -4.35903 | 0.047134 | 0.352606 |
| AP4E1    | -4.33253 | 0.034674 | 0.31463  |
| FLNA     | -4.32562 | 0.027792 | 0.284896 |
| FAM177A1 | -4.28813 | 0.02196  | 0.24869  |
| PPP2R1A  | -4.26041 | 0.039625 | 0.330957 |
| SREBF1   | -4.24365 | 0.039151 | 0.327928 |
| RYK      | -4.23775 | 0.041135 | 0.33825  |
| IGFBP7   | -4.13518 | 0.014177 | 0.200195 |
| HMGN1    | -4.0662  | 0.045853 | 0.349972 |
| LRCH3    | -4.04019 | 0.036155 | 0.319112 |
| NASP     | -3.96019 | 0.047567 | 0.353463 |
| ALMS1    | -3.93691 | 0.047458 | 0.353463 |
| PRRC2C   | -3.93337 | 0.043803 | 0.346305 |
| ENTPD1   | -3.88059 | 0.043553 | 0.345692 |
| GSN      | -3.82693 | 0.049974 | 0.364686 |

**Supplementary Table S6:** Reactome pathway analysis result listing the enriched pathways represented by the up-regulated gene list in the *Cutibacterium*-high subgroup of thyroid cancer tumors.

| Pathway identifier | Pathway name                                                                | #Entities found | #Entities total | Entities ratio | Entities pValue | Entities FDR | #Reactions found | #Reactions total | Reactions ratio | Species identifier | Species name | Submitted entities found |
|--------------------|-----------------------------------------------------------------------------|-----------------|-----------------|----------------|-----------------|--------------|------------------|------------------|-----------------|--------------------|--------------|--------------------------|
| R-HSA-73780        | RNA Polymerase III Chain Elongation                                         | 1               | 19              | 0.001          | 0.027           | 0.164        | 3                | 3                | 0.000           | 9606               | Homo sapiens | POLR3H                   |
| R-HSA-909733       | Interferon alpha/beta signaling                                             | 2               | 190             | 0.013          | 0.031           | 0.164        | 2                | 25               | 0.002           | 9606               | Homo sapiens | HLA-F                    |
| R-HSA-73980        | RNA Polymerase III Transcription Termination                                | 1               | 23              | 0.002          | 0.033           | 0.164        | 2                | 2                | 0.000           | 9606               | Homo sapiens | POLR3H                   |
| R-HSA-9609523      | Insertion of tail-anchored proteins into the endoplasmic reticulum membrane | 1               | 25              | 0.002          | 0.036           | 0.164        | 3                | 7                | 0.001           | 9606               | Homo sapiens | BAG6                     |
| R-HSA-76066        | RNA Polymerase III Transcription Initiation From Type 2 Promoter            | 1               | 27              | 0.002          | 0.039           | 0.164        | 2                | 4                | 0.000           | 9606               | Homo sapiens | POLR3H                   |
| R-HSA-76071        | RNA Polymerase III Transcription Initiation From Type 3 Promoter            | 1               | 28              | 0.002          | 0.040           | 0.164        | 2                | 4                | 0.000           | 9606               | Homo sapiens | POLR3H                   |
| R-HSA-76061        | RNA Polymerase III Transcription Initiation From Type 1 Promoter            | 1               | 28              | 0.002          | 0.040           | 0.164        | 2                | 5                | 0.000           | 9606               | Homo sapiens | POLR3H                   |
| R-HSA-1296059      | G protein gated Potassium channels                                          | 1               | 31              | 0.002          | 0.044           | 0.164        | 3                | 3                | 0.000           | 9606               | Homo sapiens | GABBR1                   |

|               |                                                                                |   |     |       |       |       |   |    |       |      |              |        |
|---------------|--------------------------------------------------------------------------------|---|-----|-------|-------|-------|---|----|-------|------|--------------|--------|
| R-HSA-1296041 | Activation of G protein gated Potassium channels                               | 1 | 31  | 0.002 | 0.044 | 0.164 | 3 | 3  | 0.000 | 9606 | Homo sapiens | GABBR1 |
| R-HSA-997272  | Inhibition of voltage gated Ca <sup>2+</sup> channels via Gbeta/gamma subunits | 1 | 31  | 0.002 | 0.044 | 0.164 | 3 | 3  | 0.000 | 9606 | Homo sapiens | GABBR1 |
| R-HSA-76046   | RNA Polymerase III Transcription Initiation                                    | 1 | 36  | 0.002 | 0.051 | 0.164 | 6 | 13 | 0.001 | 9606 | Homo sapiens | POLR3H |
| R-HSA-877300  | Interferon gamma signaling                                                     | 2 | 252 | 0.017 | 0.051 | 0.164 | 2 | 18 | 0.001 | 9606 | Homo sapiens | HLA-F  |
| R-HSA-1296065 | Inwardly rectifying K <sup>+</sup> channels                                    | 1 | 38  | 0.003 | 0.054 | 0.164 | 3 | 7  | 0.001 | 9606 | Homo sapiens | GABBR1 |
| R-HSA-5365859 | RA biosynthesis pathway                                                        | 1 | 41  | 0.003 | 0.058 | 0.164 | 1 | 11 | 0.001 | 9606 | Homo sapiens | RDH13  |

**Supplementary Table S7:** Reactome pathway analysis result listing the downregulated pathways represented by the down-regulated gene list in the *Cutibacterium*-high subgroup of thyroid cancer tumors.

| Pathway identifier | Pathway name                                 | #Entities found | #Entities total | Entities ratio | Entities pValue | Entities FDR | #Reactions found | #Reactions total | Reactions ratio | Species identifier | Species name | Submitted entities found |
|--------------------|----------------------------------------------|-----------------|-----------------|----------------|-----------------|--------------|------------------|------------------|-----------------|--------------------|--------------|--------------------------|
| R-HSA-445989       | TAK1-dependent IKK and NF-kappa-B activation | 4               | 55              | 0.004          | 0.000           | 0.011        | 9                | 17               | 0.001           | 9606               | Homo sapiens | USP14;UBE2V1;TP53;RELA   |



|               |                                            |   |     |       |       |       |    |    |       |      |              |                                      |
|---------------|--------------------------------------------|---|-----|-------|-------|-------|----|----|-------|------|--------------|--------------------------------------|
| R-HSA-6804754 | Regulation of TP53 Expression              | 2 | 4   | 0.000 | 0.000 | 0.011 | 5  | 5  | 0.000 | 9606 | Homo sapiens | TP53                                 |
| R-HSA-168138  | Toll Like Receptor 9 (TLR9) Cascade        | 5 | 121 | 0.008 | 0.000 | 0.022 | 14 | 80 | 0.006 | 9606 | Homo sapiens | USP14;PIK3C3;UBE2V1;TP53;RELA        |
| R-HSA-9020702 | Interleukin-1 signaling                    | 5 | 125 | 0.008 | 0.001 | 0.023 | 20 | 59 | 0.004 | 9606 | Homo sapiens | USP14;UBE2V1;TP53;RELA;PSMB9         |
| R-HSA-8853884 | Transcriptional Regulation by VENTX        | 3 | 48  | 0.003 | 0.002 | 0.064 | 4  | 13 | 0.001 | 9606 | Homo sapiens | TP53;RELA                            |
| R-HSA-2871837 | FCERI mediated NF-kB activation            | 5 | 175 | 0.012 | 0.002 | 0.064 | 7  | 19 | 0.001 | 9606 | Homo sapiens | IGKV1-16;IGKV3D-20;UBE2V1;RELA;PSMB9 |
| R-HSA-975871  | MyD88 cascade initiated on plasma membrane | 4 | 109 | 0.007 | 0.003 | 0.064 | 12 | 70 | 0.005 | 9606 | Homo sapiens | USP14;UBE2V1;TP53;RELA               |
| R-HSA-168176  | Toll Like Receptor 5 (TLR5) Cascade        | 4 | 109 | 0.007 | 0.003 | 0.064 | 12 | 71 | 0.005 | 9606 | Homo sapiens | USP14;UBE2V1;TP53;RELA               |
| R-HSA-168142  | Toll Like Receptor 10 (TLR10) Cascade      | 4 | 109 | 0.007 | 0.003 | 0.064 | 12 | 71 | 0.005 | 9606 | Homo sapiens | USP14;UBE2V1;TP53;RELA               |

|               |                                                                              |   |     |       |       |       |    |    |       |      |              |                              |
|---------------|------------------------------------------------------------------------------|---|-----|-------|-------|-------|----|----|-------|------|--------------|------------------------------|
| R-HSA-446652  | Interleukin-1 family signaling                                               | 5 | 183 | 0.012 | 0.003 | 0.064 | 21 | 92 | 0.007 | 9606 | Homo sapiens | USP14;UBE2V1;TP53;RELA;PSMB9 |
| R-HSA-975138  | TRAF6 mediated induction of NFkB and MAP kinases upon TLR7/8 or 9 activation | 4 | 116 | 0.008 | 0.003 | 0.064 | 12 | 60 | 0.004 | 9606 | Homo sapiens | USP14;UBE2V1;TP53;RELA       |
| R-HSA-168164  | Toll Like Receptor 3 (TLR3) Cascade                                          | 4 | 116 | 0.008 | 0.003 | 0.064 | 12 | 73 | 0.005 | 9606 | Homo sapiens | USP14;UBE2V1;TP53;RELA       |
| R-HSA-975155  | MyD88 dependent cascade initiated on endosome                                | 4 | 117 | 0.008 | 0.003 | 0.064 | 13 | 75 | 0.005 | 9606 | Homo sapiens | USP14;UBE2V1;TP53;RELA       |
| R-HSA-168181  | Toll Like Receptor 7/8 (TLR7/8) Cascade                                      | 4 | 118 | 0.008 | 0.003 | 0.064 | 13 | 79 | 0.006 | 9606 | Homo sapiens | USP14;UBE2V1;TP53;RELA       |
| R-HSA-8877330 | RUNX1 and FOXP3 control the development of regulatory T lymphocytes (Tregs)  | 2 | 17  | 0.001 | 0.004 | 0.064 | 2  | 20 | 0.001 | 9606 | Homo sapiens | CR1                          |
